# Supplementary material for: Genome Survey and SSR Analysis of Camellia nitidissima Chi (Theaceae)
Source: Genet Res (Camb). 2022 Nov 2;2022:5417970. doi: 10.1155/2022/5417970 (PMC9646326; doi:10.1155/2022/5417970)
Supplement: Supplementary Materials — Supplementary Table 1. SSR primers pairs of the CNC genome. [file 5417970.f1.txt]

Supplementary Table 1. SSR primers pairs of the CNC genome
ID	SSR type	SSR	size	start	end	FORWARD PRIMER1 (5'-3')	Tm(��C)	size	REVERSE PRIMER1 (5'-3')	Tm(��C)	size	PRODUCT1 size (bp)	start (bp)	end (bp)	FORWARD PRIMER2 (5'-3')	Tm(��C)	size	REVERSE PRIMER2 (5'-3')	Tm(��C)	size	PRODUCT2 size (bp)	start (bp)	end (bp)	FORWARD PRIMER3 (5'-3')	Tm(��C)	size	REVERSE PRIMER3 (5'-3')	Tm(��C)	size	PRODUCT3 size (bp)	start (bp)	end (bp)
scaf_0000001_6	p3	(ATT)8	24	151	174	GGCGACACCTTCTCTTCTCT	59.108	20	ACTACCACAAGCCTCCAACA	58.863	20	237	71	307	GGCGACACCTTCTCTTCTCT	59.108	20	ACACTACCACAAGCCTCCAA	58.863	20	239	71	309	GGCGACACCTTCTCTTCTCT	59.108	20	CACAAGCCTCCAACAGCAAA	59.254	20	232	71	302
scaf_0000001_54	p3	(AAG)5	15	151	165	TGGACCAAATTGACACATCGT	58.143	21	GCCCATTCAAAAAGCCCGTA	59.108	20	147	92	238	TGGACCAAATTGACACATCGT	58.143	21	TAGCCCATTCAAAAAGCCCG	58.818	20	149	92	240	TGGACCAAATTGACACATCGT	58.143	21	GGCAACACATAAGCTGGTCC	59.189	20	184	92	275
scaf_0000001_71	p3	(AAT)5	15	151	165	TTGATCGCGGATTTTCTGGA	57.605	20	AGTTCGTCAGGTTAGCTCGT	58.754	20	154	74	227	GATCGCGGATTTTCTGGATCA	58.516	21	AGTTCGTCAGGTTAGCTCGT	58.754	20	152	76	227	TGATCGCGGATTTTCTGGATC	58.516	21	AGTTCGTCAGGTTAGCTCGT	58.754	20	153	75	227
scaf_0000002_10	p3	(TCA)5	15	151	165	CCCACCAGGTGCATCAAAAA	58.953	20	GCGGTTGCGATTAGAATTGC	58.533	20	186	128	313	ATACTTTATGCCGCCCACCA	59.451	20	GCAATAGTCGGTTTGGCGAA	59.2	20	105	115	219	TTCGCCAAACCGACTATTGC	59.2	20	GCGGTTGCGATTAGAATTGC	58.533	20	114	200	313
scaf_0000002_13	p3	(CCA)5	15	151	165	CTGCCACCATCATGACATCG	59.058	20	GCTTGGTGGTGGTAGTGATG	58.547	20	124	130	253	ACCGCTACCACTATCACCAC	59.178	20	GCTTGGTGGTGGTAGTGATG	58.547	20	146	108	253	CACCGCTACCACTATCACCA	59.178	20	GCTTGGTGGTGGTAGTGATG	58.547	20	147	107	253
scaf_0000002_33	p3	(TCT)5	15	151	165	CCCAATCCATTGTTGCGCAT	59.824	20	AGCACCAACTTTTCCCTTCA	57.547	20	269	1	269	CCCAATCCATTGTTGCGCAT	59.824	20	AGCACCAACTTTTCCCTTCAT	58.037	21	269	1	269	ACCCAATCCATTGTTGCGC	59.409	19	AGCACCAACTTTTCCCTTCA	57.547	20	270	0	269
scaf_0000002_35	p4	(TAAA)6	24	151	174	TCACCGAAGACTCACTGGAA	58.3	20	CTGAGATCTCCACAATCACTGC	58.804	22	274	32	305	TCACCGAAGACTCACTGGAA	58.3	20	GAGATCTCCACAATCACTGCA	57.743	21	272	32	303	TCACCGAAGACTCACTGGAA	58.3	20	TGAGATCTCCACAATCACTGC	57.743	21	273	32	304
scaf_0000002_40	p3	(AGA)5	15	151	165	GAGGGTGATAGGGAGGGAGA	59.139	20	AACCACCTTTAGCCTCCCAT	58.617	20	100	13	112	AGGGTGATAGGGAGGGAGAG	59.136	20	ACGACAACTACCCTCACTGT	58.299	20	120	14	133	GGTGATAGGGAGGGAGAGGA	59.139	20	ACGACAACTACCCTCACTGT	58.299	20	118	16	133
scaf_0000003_8	p3	(TTA)5	15	151	165	CCTCACATCCACATCTCGGA	58.885	20	TCTCATGTATCCGCGCAATT	57.761	20	128	80	207	CCTCACATCCACATCTCGGA	58.885	20	TTCTCATGTATCCGCGCAAT	57.761	20	129	80	208	CCTCACATCCACATCTCGGA	58.885	20	ATTCTCATGTATCCGCGCAA	57.761	20	130	80	209
scaf_0000003_9	p3	(TTA)5	15	19	33	TGCGCGGATACATGAGAATT	57.761	20	TTTCCCCCTAGTGACAGCAC	59.309	20	222	59	280	TTGCGCGGATACATGAGAAT	57.761	20	TTTCCCCCTAGTGACAGCAC	59.309	20	223	58	280	ATTGCGCGGATACATGAGAA	57.761	20	TTTCCCCCTAGTGACAGCAC	59.309	20	224	57	280
scaf_0000005_10	p4	(TTGG)6	24	151	174	GGTTGGTTGGTTGGTTGGTT	59.094	20	TAGGAATGCAAATGCGGGTG	58.898	20	112	152	263	TTGGTTGGTTGGTTGGTTGG	59.095	20	TAGGAATGCAAATGCGGGTG	58.898	20	110	154	263	TTGGTTGGTTGGTTGGTTGG	59.095	20	TAGGAATGCAAATGCGGGTG	58.898	20	114	150	263
scaf_0000005_22	p3	(GGA)8	24	151	174	CCGTTGGGGTAGAGACAACT	59.026	20	CCCCTGAACTTGTTCCCTCT	58.932	20	126	91	216	TGCAACAGGATCAGAGTCGT	59.031	20	CCCCATGAATCTCCTCCTCC	58.937	20	132	53	184	TGCAACAGGATCAGAGTCGT	59.031	20	CCCCCATGAATCTCCTCCTC	58.937	20	133	53	185
scaf_0000006_26	p3	(AAG)5	15	151	165	AGAAGAAGCACTCCAGGCAT	59.01	20	CTAATGGCCCGGCTTGATTC	59.046	20	105	178	282	GAGACAAACCTGCCATGTGG	59.116	20	CTAATGGCCCGGCTTGATTC	59.046	20	178	105	282	AAGAAGAAGCACTCCAGGCA	59.233	20	CTAATGGCCCGGCTTGATTC	59.046	20	106	177	282
scaf_0000006_35	p4	(ATAA)5	20	151	170	CCCACTGCATCATAACCAGC	58.973	20	GTCCACGCTGTCCACAAATT	59.048	20	121	83	203	GCCCACTGCATCATAACCAG	58.973	20	GTCCACGCTGTCCACAAATT	59.048	20	122	82	203	CCCACTGCATCATAACCAGC	58.973	20	GAAGCTCCAAGGATGTGCAG	58.907	20	158	83	240
scaf_0000008_23	p3	(TTG)11	33	151	183	TGATCACTACGGGAAGAACTGA	58.572	22	CACGTAATCAACACTTCCACGA	58.946	22	114	6	119	TGATCACTACGGGAAGAACTGA	58.572	22	TCACGTAATCAACACTTCCACG	58.946	22	115	6	120	TGATCACTACGGGAAGAACTGA	58.572	22	ACGTAATCAACACTTCCACGA	57.626	21	113	6	118
scaf_0000008_30	p3	(TTC)5	15	151	165	ACTTCACCCTACACTGCCTC	59.023	20	GAACCATGTTCCACACCATGT	58.761	21	178	15	192	TACACTGCCTCGCTTTCTCA	59.034	20	GAACCATGTTCCACACCATGT	58.761	21	169	24	192	CTGCCTCGCTTTCTCACTTC	58.925	20	GAACCATGTTCCACACCATGT	58.761	21	165	28	192
scaf_0000008_31	p3	(GGT)6	18	151	168	GCTCATGGTGGCAGTAATGG	58.973	20	TCACCACCACCAAACTCCAT	59.15	20	110	177	286	GGTAATGCTCATGGTGGCAG	58.973	20	TCACCACCACCAAACTCCAT	59.15	20	116	171	286	TGTTGTAAGGTGGTGGTGGT	59.08	20	GCATTACCATCACCACCACC	58.897	20	111	142	252
scaf_0000008_32	p3	(CAT)5	15	151	165	CATCATGTAGCCTCCTCCGA	58.668	20	TGCAGAGGAGTATGAGGGGA	59.363	20	128	159	286	TCATCATGTAGCCTCCTCCG	58.668	20	TGCAGAGGAGTATGAGGGGA	59.363	20	129	158	286	CATCATGTAGCCTCCTCCGA	58.668	20	TTGCAGAGGAGTATGAGGGG	58.5	20	129	159	287
scaf_0000008_64	p3	(AGA)15	45	151	195	TGCTTGTAAATGTTGGGCACA	58.965	21	ATCCAAACTTCCTAAGGCTTCT	57.063	22	100	39	138	TGCTTGTAAATGTTGGGCAC	57.19	20	ATCCAAACTTCCTAAGGCTTCT	57.063	22	100	39	138	ATGCTTGTAAATGTTGGGCAC	57.682	21	ATCCAAACTTCCTAAGGCTTCT	57.063	22	101	38	138
scaf_0000009_20	p3	(AGA)5	15	151	165	CTGCTCTCCCCAAACCCTAA	59.008	20	CTCCCACCATTCCTCACACT	59.013	20	242	21	262	TCTCCCCAAACCCTAACACC	58.93	20	CTCCCACCATTCCTCACACT	59.013	20	238	25	262	CTGCTCTCCCCAAACCCTAA	59.008	20	AGAAACCACCCTTGCAACAC	58.889	20	262	21	282
scaf_0000009_27	p4	(CCTC)5	20	151	170	TATAGCAGGTGTGGGCCAAA	59.004	20	AGGGAGGGAGGAAAGAAACG	59.015	20	136	25	160	TTATAGCAGGTGTGGGCCAA	59.004	20	AGGGAGGGAGGAAAGAAACG	59.015	20	137	24	160	TTTATAGCAGGTGTGGGCCA	59.004	20	AGGGAGGGAGGAAAGAAACG	59.015	20	138	23	160
scaf_0000009_32	p4	(TGTT)5	20	151	170	GAAGGTGGTCAGGTCTAGGG	58.804	20	CAGTGACGCTGGAAACTGTT	58.7	20	146	68	213	GAAGGTGGTCAGGTCTAGGG	58.804	20	AGATGTGTGACAGTGACGCT	59.324	20	156	68	223	GGTGGTCAGGTCTAGGGTTT	58.641	20	CAGTGACGCTGGAAACTGTT	58.7	20	143	71	213
scaf_0000010_25	p4	(AAAT)5	20	6	25	CCCCGTTTGTCCCCATTTTT	58.947	20	TTGCTAAAAAGCTGTAGGAAGC	57.234	22	186	182	367	ATCCGTGTCCGTGTTCCTAC	59.471	20	TTGCTAAAAAGCTGTAGGAAGC	57.234	22	132	236	367	CATCCGTGTCCGTGTTCCTA	59.471	20	TTGCTAAAAAGCTGTAGGAAGC	57.234	22	133	235	367
scaf_0000010_28	p3	(TTA)7	21	151	171	CACATTGGAGGTGGAAAGGTG	59.111	21	AAGAGCTTCCTCCATGGCAT	59.075	20	232	17	248	CACATTGGAGGTGGAAAGGTG	59.111	21	CAAAGAGCTTCCTCCATGGC	58.899	20	234	17	250	ACATTGGAGGTGGAAAGGTGA	59.22	21	AAGAGCTTCCTCCATGGCAT	59.075	20	231	18	248
scaf_0000011_4	p4	(AAAT)5	20	273	292	GCACAAGCTTCACGGGTAAA	59.051	20	TATTGCTGGGCTGGTGAAAG	58.162	20	221	17	237	TGAGTTGTACGGCTGTGTGA	59.252	20	TATTGCTGGGCTGGTGAAAG	58.162	20	196	42	237	AGGATGAGTTGTACGGCTGT	58.733	20	TATTGCTGGGCTGGTGAAAG	58.162	20	200	38	237
scaf_0000011_14	p3	(TTC)6	18	151	168	GAACTGCCTCCCAATTTGCA	59.032	20	CACACGGAGAAACAGTAAGCA	58.52	21	187	55	241	GAACTGCCTCCCAATTTGCA	59.032	20	ACACACGGAGAAACAGTAAGC	58.519	21	188	55	242	GTGATGCCTCCAGTTGGTTG	59.116	20	CACACGGAGAAACAGTAAGCA	58.52	21	134	108	241
scaf_0000011_22	p3	(TAT)5	15	151	165	TTTGAGCAGTCAGTTGGGAA	57.273	20	ACCATCAGAGATGCCCTAGC	58.945	20	110	26	135	TTTTGAGCAGTCAGTTGGGA	57.273	20	ACCATCAGAGATGCCCTAGC	58.945	20	111	25	135	TTGAGCAGTCAGTTGGGAAT	57.043	20	ACCATCAGAGATGCCCTAGC	58.945	20	109	27	135
scaf_0000011_33	p4	(AAAG)7	28	151	178	AAAACAGTGACAAGTCCGGC	58.978	20	TAGTGACTACCAAACGCGAC	57.663	20	100	208	307	AAAACAGTGACAAGTCCGGC	58.978	20	TTAGTGACTACCAAACGCGAC	58.335	21	101	208	308	AAAACAGTGACAAGTCCGGC	58.978	20	TAGTGACTACCAAACGCGACC	60.068	21	100	208	307
scaf_0000013_7	p3	(AAT)6	18	151	168	GAGTTGTTGATTCTCCTTGAGCT	58.677	23	TCTCTCACTGAATGCATTGTGTC	59.001	23	274	34	307	AGAGTTGTTGATTCTCCTTGAGC	58.677	23	TCTCTCACTGAATGCATTGTGTC	59.001	23	275	33	307	GAGTTGTTGATTCTCCTTGAGCT	58.677	23	CTCTCACTGAATGCATTGTGTCT	58.998	23	273	34	306
scaf_0000013_8	p4	(AAAT)5	20	151	170	TGGTGAGTAGCCTGCTTTCA	58.944	20	GCGCGATTCTCAGTTTCTGA	58.65	20	231	29	259	TGGTGAGTAGCCTGCTTTCA	58.944	20	AGCGCGATTCTCAGTTTCTG	58.646	20	232	29	260	TGGTGAGTAGCCTGCTTTCA	58.944	20	CAGCGCGATTCTCAGTTTCT	58.646	20	233	29	261
scaf_0000013_25	p3	(TCC)8	24	151	174	GAACGAACAGATCAGCAGCC	59.276	20	AGGAGGAGGAAGAGAGGAGG	59.066	20	103	57	159	GAACGAACAGATCAGCAGCC	59.276	20	AGGAGGAGGAGGAAGAGAGG	59.066	20	106	57	162	GAACGAACAGATCAGCAGCC	59.276	20	AGGAGGAGGAGGAGGAAGAG	59.066	20	109	57	165
scaf_0000013_31	p4	(CAAT)5	20	151	170	ATCATCACCCCCTAAGGCAC	59.153	20	GATCTCTTCGCACCAGCTTG	58.995	20	121	116	236	ATCATCACCCCCTAAGGCAC	59.153	20	CAAGATCTCTTCGCACCAGC	58.995	20	124	116	239	ATCATCACCCCCTAAGGCAC	59.153	20	AGATCTCTTCGCACCAGCTT	59.099	20	122	116	237
scaf_0000014_10	p4	(ATTT)6	24	151	174	CCAATGATCAGCCCACAACA	58.452	20	TGGAGCCCAACACAACAAAG	58.89	20	164	131	294	ACCAATGATCAGCCCACAAC	58.451	20	TGGAGCCCAACACAACAAAG	58.89	20	165	130	294	AGTGGACTAAGTGGTTGCCC	59.599	20	TGGAGCCCAACACAACAAAG	58.89	20	237	58	294
scaf_0000014_15	p3	(ACC)7	21	364	384	AAGGAAATGTGTTTCGCCCG	59.404	20	GGAGATTGTAGCGTTGGCAG	58.99	20	270	80	349	GGAAATGTGTTTCGCCCGAA	59.406	20	GGAGATTGTAGCGTTGGCAG	58.99	20	268	82	349	AAGGAAATGTGTTTCGCCCG	59.404	20	ATTGTAGCGTTGGCAGTGTC	58.843	20	266	80	345
scaf_0000015_3	p3	(ATT)7	21	151	171	TGCTAGCTTGTCGCGTTTTT	59.058	20	AACAACACCGTCCAATGTGG	58.971	20	132	110	241	TGCTAGCTTGTCGCGTTTTT	59.058	20	CCAACAACACCGTCCAATGT	58.971	20	134	110	243	TGCTAGCTTGTCGCGTTTTT	59.058	20	CATTGACCCAACAACACCGT	58.971	20	141	110	250
scaf_0000015_20	p3	(AAT)5	15	151	165	CGCATCCGTACCTGTATCCA	59.328	20	TCAATGAAACACAGGTGCGG	59.049	20	106	7	112	CCGCACCTGTGTTTCATTGA	59.049	20	ATGTTTCGCCCGTGTATTGC	59.55	20	176	93	268	CGCATCCGTACCTGTATCCA	59.328	20	ATGTTTCGCCCGTGTATTGC	59.55	20	262	7	268
scaf_0000016_12	p3	(AAG)8	24	151	174	GTTAGCCCTGTGAGAGCTCA	59.102	20	CTTTTCTTTCTTCCCGCCCC	59.111	20	149	57	205	GTTAGCCCTGTGAGAGCTCA	59.102	20	CCTTTTCTTTCTTCCCGCCC	59.111	20	150	57	206	TGTTAGCCCTGTGAGAGCTC	59.102	20	CTTTTCTTTCTTCCCGCCCC	59.111	20	150	56	205
scaf_0000017_3	p3	(AGA)5	15	151	165	TAGATCAAGGCGAACCACCA	58.728	20	TCACGTGAGGCCATAAGGTT	59.019	20	127	105	231	TAGATCAAGGCGAACCACCA	58.728	20	TTCACGTGAGGCCATAAGGT	59.019	20	128	105	232	TAGATCAAGGCGAACCACCA	58.728	20	AGTGTTCACGTGAGGCCATA	59.026	20	132	105	236
scaf_0000017_7	p3	(ATC)6	18	151	168	TATCCCAACAAGCAGCAGGA	59.009	20	TGATGTGCCTGATGAACCCT	59.006	20	118	30	147	TATCCCAACAAGCAGCAGGA	59.009	20	GATGGAGCTGCTTTGCTTGT	59.113	20	183	30	212	TATCCCAACAAGCAGCAGGA	59.009	20	ACAAGATGGAGCTGCTTTGC	59.113	20	187	30	216
scaf_0000017_10	p3	(ATA)7	21	7	27	TGGGCCATAAGGTAATTAGGCT	58.939	22	GCTTGTTATAGCAATGCCACC	57.916	21	109	186	294	TGGGCCATAAGGTAATTAGGCT	58.939	22	GCTTGTTATAGCAATGCCACCT	59.31	22	109	186	294	TGGGCCATAAGGTAATTAGGC	57.481	21	GCTTGTTATAGCAATGCCACC	57.916	21	109	186	294
scaf_0000017_11	p3	(AAT)6	18	151	168	GTGTCTACCCAGCAACATGG	58.547	20	TCGTCCTTAGGTTGTGAGCT	58.371	20	103	38	140	GGTGTCTACCCAGCAACATG	58.547	20	TCGTCCTTAGGTTGTGAGCT	58.371	20	104	37	140	CCAGCAACATGGGAGGTCTA	59.088	20	TGAACCTTTTTCACCTCTGCC	58.693	21	175	46	220
scaf_0000017_34	p3	(TTG)7	21	151	171	TGGTGTGTACACTGCAGCTA	58.955	20	ACAGGATTCCCCTTGATGCA	58.998	20	170	70	239	TGGTGTGTACACTGCAGCTA	58.955	20	TGGTTCCTGACAGGATTCCC	59.008	20	179	70	248	CATGAGGAAGTGGAGGGTCA	58.721	20	ACAGGATTCCCCTTGATGCA	58.998	20	210	30	239
scaf_0000017_35	p3	(TTG)7	21	16	36	GGATGCATCAAGGGGAATCC	58.374	20	AAATGACCACAAAAGCCGCT	58.96	20	237	82	318	GGATGCATCAAGGGGAATCC	58.374	20	CCACAAAAGCCGCTACAAGT	59.048	20	231	82	312	GGATGCATCAAGGGGAATCC	58.374	20	ACCACAAAAGCCGCTACAAG	59.048	20	232	82	313
scaf_0000018_26	p3	(GGA)9	27	151	177	AAGAAGTGTGTGGGAGGAGG	58.94	20	TGAAAAACCCCCAACCTCCT	59.062	20	143	50	192	AAGAAGTGTGTGGGAGGAGG	58.94	20	ATACACCCCAGTAAAGGCCC	59.076	20	203	50	252	AGATGGAGGTGTTGGGGATG	59.078	20	TGAAAAACCCCCAACCTCCT	59.062	20	173	20	192
scaf_0000018_43	p4	(ATTT)5	20	151	170	GCTCAATTGCAAGGACAAAATCG	59.634	23	GCTTAACTATCACCCATCACATG	57.32	23	226	4	229	CAATTGCAAGGACAAAATCGTC	57.109	22	GCTTAACTATCACCCATCACATG	57.32	23	223	7	229	GCTCAATTGCAAGGACAAAATC	57.084	22	GCTTAACTATCACCCATCACATG	57.32	23	226	4	229
scaf_0000020_33	p3	(AGA)7	21	151	171	CGTGCTATGTTGCCCGAAAA	59.48	20	TTTGAGAGAGAGGGGCAAGG	59.013	20	101	28	128	AAGAGTCGTGCTATGTTGCC	58.273	20	TTTGAGAGAGAGGGGCAAGG	59.013	20	107	22	128	CGTGCTATGTTGCCCGAAAA	59.48	20	GTGTTTGAGAGAGAGGGGCA	59.313	20	104	28	131
scaf_0000020_34	p3	(AGA)7	21	3	23	CGATACCCACCGTCGATCTT	59.333	20	GAGAGAAACAGAGAGGCCAGA	58.825	21	100	205	304	CGATACCCACCGTCGATCTT	59.333	20	GAGAGAGAAACAGAGAGGCCA	58.825	21	102	205	306	CGATACCCACCGTCGATCTT	59.333	20	AGAGAGAAACAGAGAGGCCAG	58.821	21	101	205	305
scaf_0000020_41	p3	(TAT)6	18	151	168	TGAAATTCAGAGGACGGAGGA	58.464	21	ACCTAAAACCATGACCCCACA	59.216	21	119	98	216	TGAAATTCAGAGGACGGAGGA	58.464	21	ACCATGACCCCACAATCAAG	57.779	20	112	98	209	TGAAATTCAGAGGACGGAGGA	58.464	21	ACCATGACCCCACAATCAAGA	59.29	21	112	98	209
scaf_0000021_1	p3	(AAT)13	39	151	189	AGGCCAGGTCTTCTTCGTTA	58.359	20	AGCAGAAGAGTTGTTCCCAGA	58.95	21	107	225	331	GAGGCCAGGTCTTCTTCGTT	59.678	20	AGCAGAAGAGTTGTTCCCAGA	58.95	21	108	224	331	AGGCCAGGTCTTCTTCGTTA	58.359	20	GCAGAAGAGTTGTTCCCAGAC	58.853	21	106	225	330
scaf_0000023_8	p3	(GAA)5	15	151	165	TTTTCCCCATCCCCTACACA	58.238	20	TGCAACACAAGAGGGAATACT	57.212	21	201	74	274	TTTCCCCATCCCCTACACAT	58.006	20	TGCAACACAAGAGGGAATACT	57.212	21	200	75	274	AGAACATTTTCCCCATCCCCT	58.989	21	TGCAACACAAGAGGGAATACT	57.212	21	207	68	274
scaf_0000024_8	p3	(TCT)7	21	151	171	CGAGGCGAGTGAAAATGGAG	58.998	20	AGCATCGAATCAACAGCGTC	58.998	20	273	40	312	CGAGGCGAGTGAAAATGGAG	58.998	20	GAGCATCGAATCAACAGCGT	58.998	20	274	40	313	CGAGGCGAGTGAAAATGGAG	58.998	20	GAGCAACAATGGTGTGCAGA	59.046	20	196	40	235
scaf_0000026_6	p3	(AGA)5	15	151	165	GCAAAAGAGAAAGGCCCACA	58.96	20	CAGCATCTGTGGGAAGTTGG	58.829	20	145	84	228	GCAAAAGAGAAAGGCCCACA	58.96	20	ATTGACCTCCTTGGCCTGTT	59.22	20	198	84	281	GCAAAAGAGAAAGGCCCACA	58.96	20	AACATTGACCTCCTTGGCCT	59.22	20	201	84	284
scaf_0000027_1	p3	(AAG)10	30	151	180	TGCATGTTAGGGTCGTCACA	59.318	20	TTGCACGTACGACATCATGC	59.281	20	141	95	235	TGCATGTTAGGGTCGTCACA	59.318	20	CCCGCAAATGGTTGTCGAAA	59.688	20	122	95	216	GCATGTTAGGGTCGTCACAA	58.197	20	TTGCACGTACGACATCATGC	59.281	20	140	96	235
scaf_0000027_2	p3	(AAG)9	27	1	27	GCATGATGTCGTACGTGCAA	59.281	20	ACAAAGTTGCAAAGCCATGT	57.014	20	186	63	248	TTTCGACAACCATTTGCGGG	59.688	20	ACAAAGTTGCAAAGCCATGT	57.014	20	205	44	248	AACCATTTGCGGGCATGATG	59.824	20	ACAAAGTTGCAAAGCCATGT	57.014	20	198	51	248
scaf_0000029_19	p3	(TTC)13	39	151	189	TACCCACCTCTCTCCCTCTC	59.072	20	TGGTGTTGAAAGCAGACTGC	58.976	20	176	105	280	ACAAGCCATACCCACCTCTC	59.088	20	TGGTGTTGAAAGCAGACTGC	58.976	20	184	97	280	TACCCACCTCTCTCCCTCTC	59.072	20	ACGGTAGTGTTGGTGGTGAT	58.947	20	195	105	299
scaf_0000029_27	p3	(ATA)5	15	151	165	ATCTCAGATCGCCGGAGAAG	59.042	20	TGCTTATGAGACCTTGCATCA	57.367	21	112	0	111	ATCTCAGATCGCCGGAGAAG	59.042	20	ACATTGCTTATGAGACCTTGCA	58.311	22	116	0	115	AGATCGCCGGAGAAGTCAAA	59.104	20	TGCTTATGAGACCTTGCATCA	57.367	21	107	5	111
scaf_0000029_32	p3	(AAT)5	15	284	298	GCGCGAGTTTGACAATAGGT	58.924	20	TCCTTGGGGTCACCGATTTT	59.225	20	179	87	265	AAACCCTAAGCGCGAGTTTG	59.128	20	TCCTTGGGGTCACCGATTTT	59.225	20	188	78	265	CAAACCCTAAGCGCGAGTTT	59.128	20	TCCTTGGGGTCACCGATTTT	59.225	20	189	77	265
scaf_0000029_34	p3	(AAT)13	39	151	189	GCCTAGCCACATGCCAAATT	59.174	20	GCTCAAAACCAAGCAAGCCT	59.61	20	143	97	239	GCCTAGCCACATGCCAAATT	59.174	20	TGGCTCAAAACCAAGCAAGC	59.895	20	145	97	241	GCCTAGCCACATGCCAAATT	59.174	20	CTCAAAACCAAGCAAGCCTCT	59.041	21	142	97	238
scaf_0000030_8	p3	(GGA)8	24	151	174	GTGCAGCAGGATCAGAATCG	59.064	20	TCTTCCTCCTCCTCCTCCTC	59.069	20	125	52	176	GCGCTCGAGTAGGATATCGA	58.923	20	TCTTCCTCCTCCTCCTCCTC	59.069	20	146	31	176	CTATTTGGAGGATGACGCGC	59.138	20	TCTTCCTCCTCCTCCTCCTC	59.069	20	162	15	176
scaf_0000031_3	p3	(ATA)13	39	151	189	AAATCTCGAGGAAGCCTAATGT	57.238	22	TGTGATTGAAGAGGTCCTTGC	58.217	21	250	12	261	AAATCTCGAGGAAGCCTAATGT	57.238	22	GTGATTGAAGAGGTCCTTGCT	57.935	21	249	12	260	AAATCTCGAGGAAGCCTAATGT	57.238	22	AGAGGTCCTTGCTTACACATCA	59.094	22	241	12	252
scaf_0000033_14	p4	(TTTA)6	24	151	174	CATTGTCTTGCCTCCCATCG	58.98	20	GAGACCTAGGTGCAATTGGC	58.616	20	261	47	307	CATCGCTATTGCCACTCACC	59.06	20	GAGACCTAGGTGCAATTGGC	58.616	20	280	28	307	TCTTGCCTCCCATCGACATT	59.088	20	GAGACCTAGGTGCAATTGGC	58.616	20	256	52	307
scaf_0000034_18	p3	(AGG)7	21	151	171	AACGCTAGTGCTCATGGAGT	59.102	20	ACTTCTCCTTCTCCTGCTGC	59.387	20	102	48	149	AACGCTAGTGCTCATGGAGT	59.102	20	ATTCCTCCTCCTCCTCCTCC	59.434	20	126	48	173	AACGCTAGTGCTCATGGAGT	59.102	20	CCTCCTCCTCCTCCTCCTAC	59.519	20	120	48	167
scaf_0000034_18	p3	(AGA)13	39	277	315	AACGCTAGTGCTCATGGAGT	59.102	20	ACTTCTCCTTCTCCTGCTGC	59.387	20	102	48	149	AACGCTAGTGCTCATGGAGT	59.102	20	ATTCCTCCTCCTCCTCCTCC	59.434	20	126	48	173	AACGCTAGTGCTCATGGAGT	59.102	20	CCTCCTCCTCCTCCTCCTAC	59.519	20	120	48	167
scaf_0000034_19	p3	(AGG)7	21	25	45	GCAGCAGGAGAAGGAGAAGT	59.387	20	ACCTCGTTCTCCTTCTCCTC	58.158	20	207	4	210	GGAGGAGGAGGAGGAGGAAT	59.434	20	ACCTCGTTCTCCTTCTCCTC	58.158	20	183	28	210	GTAGGAGGAGGAGGAGGAGG	59.519	20	ACCTCGTTCTCCTTCTCCTC	58.158	20	189	22	210
scaf_0000034_19	p3	(AGA)13	39	151	189	GCAGCAGGAGAAGGAGAAGT	59.387	20	ACCTCGTTCTCCTTCTCCTC	58.158	20	207	4	210	GGAGGAGGAGGAGGAGGAAT	59.434	20	ACCTCGTTCTCCTTCTCCTC	58.158	20	183	28	210	GTAGGAGGAGGAGGAGGAGG	59.519	20	ACCTCGTTCTCCTTCTCCTC	58.158	20	189	22	210
scaf_0000034_31	p4	(TTTA)5	20	151	170	TCCTACTCCAGTGGACTCCA	58.919	20	CGTCTAAATCGACCCGGACT	59.263	20	116	0	115	CTACTCCAGTGGACTCCAGC	59.179	20	CGTCTAAATCGACCCGGACT	59.263	20	114	2	115	CCTACTCCAGTGGACTCCAG	58.52	20	CGTCTAAATCGACCCGGACT	59.263	20	115	1	115
scaf_0000035_11	p3	(CCA)6	18	151	168	CGTCGTCTTACCCCTCTACC	58.98	20	GAGGGGTAGAGGAGGAAAGC	58.875	20	144	108	251	TTACCAAGGACGAAGACCCC	59.021	20	GAGGGGTAGAGGAGGAAAGC	58.875	20	217	35	251	CGTCGTCTTACCCCTCTACC	58.98	20	TTGGATGTGGTTGAGGTGGA	58.855	20	190	108	297
scaf_0000035_27	p4	(TTTA)5	20	151	170	CAGCATAACCCGCCCAATAC	59.048	20	GATAAAACCCGCAACCAGCA	59.115	20	113	18	130	CAGCATAACCCGCCCAATAC	59.048	20	ACCCGCAACCAGCAATAATG	59.183	20	107	18	124	CAGCATAACCCGCCCAATAC	59.048	20	GGGATAAAACCCGCAACCAG	59.185	20	115	18	132
scaf_0000035_44	p3	(AAT)5	15	151	165	CCTCCAACCCAGTCCAGAAA	59.229	20	TCATTTGGGACGGTGCTAGT	59.019	20	105	112	216	CCTCCAACCCAGTCCAGAAA	59.229	20	TTTGGGACGGTGCTAGTAGG	59.1	20	102	112	213	TTTCAAGCCTCCAACCCAGT	59.444	20	TCATTTGGGACGGTGCTAGT	59.019	20	112	105	216
scaf_0000036_2	p4	(TTTA)5	20	151	170	TGAATTCTGCTGGCAAATCTGT	58.841	22	CCCAAGCCGCCTATCATTTC	59.046	20	220	24	243	TGAATTCTGCTGGCAAATCTGT	58.841	22	TCTCTTCAAGCCACCACTGA	58.576	20	173	24	196	TGAATTCTGCTGGCAAATCTGT	58.841	22	ACTCTCTTCAAGCCACCACT	58.571	20	175	24	198
scaf_0000036_16	p3	(ATC)5	15	151	165	CCTCAAGATCAACAACACGCA	59.127	21	CAAGGCCAAGGGGTTCTAGA	59.008	20	147	164	310	TCCTCAAGATCAACAACACGC	58.857	21	CAAGGCCAAGGGGTTCTAGA	59.008	20	148	163	310	CCTCAAGATCAACAACACGCA	59.127	21	GGCCAAGGGGTTCTAGATCA	58.787	20	144	164	307
scaf_0000036_18	p3	(GAA)7	21	151	171	AGACGAAGGAGAGAAGGCTG	58.818	20	CCAGGAGCTTTGAATGTGCA	58.75	20	101	205	305	AGACGAAGGAGAGAAGGCTG	58.818	20	GTCCAGTCCAGGAGCTTTGA	59.313	20	108	205	312	GGAGAGAAGGCTGGCGAATA	59.247	20	GTCCAGTCCAGGAGCTTTGA	59.313	20	101	212	312
scaf_0000036_35	p3	(TAT)9	27	151	177	GTTTTCCATGCCGGGCTAAT	58.889	20	AGAGTTCACGTGCAAGAACA	57.69	20	276	19	294	GTTTTCCATGCCGGGCTAAT	58.889	20	TCAAGAGTTCACGTGCAAGA	57.405	20	279	19	297	GTTTTCCATGCCGGGCTAAT	58.889	20	AAGAGTTCACGTGCAAGAACA	58.372	21	277	19	295
scaf_0000036_40	p3	(AAT)8	24	151	174	TTAACCGAAGCACCGAGGAG	59.754	20	TCGATCCAACCCTTAGGCTG	59.169	20	123	0	122	TTAACCGAAGCACCGAGGAG	59.754	20	AACCCTTAGGCTGCCTTCTC	59.379	20	116	0	115	GAAGCACCGAGGAGCTAAAA	57.905	20	TCGATCCAACCCTTAGGCTG	59.169	20	117	6	122
scaf_0000040_26	p3	(ATA)13	39	151	189	ACGCCATGACAGACGTATCA	59.185	20	ACTTTGGCCCAGTTCTTTAACA	58.362	22	276	41	316	CAGACACCAAAACACAGCAGA	58.984	21	GCGGTAATTATACTTTGGCCCA	58.784	22	256	72	327	CAGACACCAAAACACAGCAGA	58.984	21	TGCGGTAATTATACTTTGGCCC	58.784	22	257	72	328
scaf_0000040_28	p3	(ATA)8	24	151	174	CAAATACCCGCACCTCTTCG	58.993	20	GCGGTATTTATACTTTGGCCCA	58.784	22	265	35	299	CAAATACCCGCACCTCTTCG	58.993	20	TGCGGTATTTATACTTTGGCCC	58.784	22	266	35	300	ATACCCGCACCTCTTCGAAA	59.1	20	GCGGTATTTATACTTTGGCCCA	58.784	22	262	38	299
scaf_0000040_29	p3	(TAT)7	21	151	171	CTTTGGCCCAGTTCTTCAACA	58.969	21	AGCCAAATACCTGCACCTCT	59.005	20	260	23	282	ACTTTGGCCCAGTTCTTCAAC	58.968	21	AGCCAAATACCTGCACCTCT	59.005	20	261	22	282	CTTTGGCCCAGTTCTTCAACA	58.969	21	CAGCCAAATACCTGCACCTC	58.902	20	261	23	283
scaf_0000041_7	p3	(ATA)5	15	151	165	TATTTCTCCCCCACCACGAG	58.799	20	CGGGACTTAAAATGATGGCAGA	58.721	22	241	70	310	TATTTCTCCCCCACCACGAG	58.799	20	TCGGGACTTAAAATGATGGCAG	58.721	22	242	70	311	TATTTCTCCCCCACCACGAG	58.799	20	TCGGGACTTAAAATGATGGCA	57.642	21	242	70	311
scaf_0000041_9	p3	(TAT)8	24	151	174	TCCCACAACCCAAGCTACTT	58.854	20	AGTGGTGGTACGGGATCTTG	59.097	20	172	124	295	TCCCACAACCCAAGCTACTT	58.854	20	CAGTGGTGGTACGGGATCTT	59.097	20	173	124	296	CCCACAACCCAAGCTACTTG	58.752	20	AGTGGTGGTACGGGATCTTG	59.097	20	171	125	295
scaf_0000041_31	p3	(AAG)13	39	151	189	CCTTCCTTTAACACCTTGGCA	58.407	21	GTCGCTTGCAATTGGCTTTG	59.214	20	183	97	279	ACCTTCCTTTAACACCTTGGC	58.406	21	GTCGCTTGCAATTGGCTTTG	59.214	20	184	96	279	CCTTCCTTTAACACCTTGGCA	58.407	21	TCGCTTGCAATTGGCTTTGA	59.327	20	182	97	278
scaf_0000043_2	p3	(TGA)5	15	151	165	CAGTCGAGTAGCCCTAGCAA	58.896	20	GGCCCCAACCCTAATCATCA	59.444	20	220	75	294	GGTCCACAACCCCTAAGGAT	58.704	20	GGCCCCAACCCTAATCATCA	59.444	20	261	34	294	CTGCAGTCGAGTAGCCCTAG	59.334	20	GGCCCCAACCCTAATCATCA	59.444	20	223	72	294
scaf_0000043_5	p3	(GAT)5	15	151	165	GCGGAGTTGATGTGCCTAAG	58.99	20	GACTAGAGTCGTCGTCCCAG	58.992	20	189	112	300	GCGGAGTTGATGTGCCTAAG	58.99	20	CCCTCGGGACATCATCATCA	58.949	20	147	112	258	GCGGAGTTGATGTGCCTAAG	58.99	20	GCCCCCATTGCCAAAGATAC	59.247	20	122	112	233
scaf_0000046_28	p3	(GTG)6	18	151	168	GTGGCATGATGGTGATGGTG	59.257	20	TGTCACCCTACGATTGGCTT	59.019	20	211	3	213	GTGGTGGCATGATGGTGATG	59.257	20	TGTCACCCTACGATTGGCTT	59.019	20	214	0	213	GTGGCATGATGGTGATGGTG	59.257	20	AGCCAACAAAACTCACCACC	58.889	20	178	3	180
scaf_0000048_7	p3	(TAT)13	39	151	189	ACCTTTTGGCCCAGTTTTCT	57.825	20	AGTAGTGGGGCCAAATTAAAGT	57.602	22	212	37	248	ACCTTTTGGCCCAGTTTTCTA	57.678	21	AGTAGTGGGGCCAAATTAAAGT	57.602	22	212	37	248	TACCTTTTGGCCCAGTTTTCT	57.678	21	AGTAGTGGGGCCAAATTAAAGT	57.602	22	213	36	248
scaf_0000050_3	p3	(AGA)5	15	151	165	GGCAAGTATTAAAGTTTGGCGG	58.492	22	CACCACCATTGTGCTTTGGA	58.961	20	101	169	269	GGCAAGTATTAAAGTTTGGCGG	58.492	22	TCACCACCATTGTGCTTTGG	58.961	20	102	169	270	GGGCAAGTATTAAAGTTTGGCG	58.492	22	CACCACCATTGTGCTTTGGA	58.961	20	102	168	269
scaf_0000050_18	p3	(AGA)6	18	151	168	TTTGCTTAGTCATGGAGGTGAA	57.634	22	AGCCATATACCCCCATGTGT	58.167	20	161	95	255	TTTTGCTTAGTCATGGAGGTGA	57.634	22	AGCCATATACCCCCATGTGT	58.167	20	162	94	255	TGCTTAGTCATGGAGGTGAATT	57.425	22	AGCCATATACCCCCATGTGT	58.167	20	159	97	255
scaf_0000050_26	p3	(CAA)5	15	151	165	AGTGCACTTTCGGGATGGTA	59.019	20	CAGCTGCCTTGTTGGTCAAA	59.254	20	153	42	194	AGTGCACTTTCGGGATGGTA	59.019	20	ATGAATCTGTTCAGCGCAGC	59.269	20	169	42	210	GCCTCTAAGTGCACTTTCGG	58.92	20	CAGCTGCCTTGTTGGTCAAA	59.254	20	160	35	194
scaf_0000052_17	p4	(ATAG)7	28	151	178	CAACACCATGGGAAGCCTTC	59.109	20	CGGGGAGCAGACACATAGAT	58.956	20	112	117	228	ACCATGGGAAGCCTTCACTT	59.22	20	CGGGGAGCAGACACATAGAT	58.956	20	108	121	228	GTCACATTGTGCCAACACCA	59.256	20	CGGGGAGCAGACACATAGAT	58.956	20	124	105	228
scaf_0000052_22	p4	(TATT)5	20	151	170	GTGTGTCAAGATTGTGCCTGA	58.779	21	CAAACACCCGATCTGGAAGC	59.195	20	227	56	282	AGTGTGTCAAGATTGTGCCTG	58.775	21	CAAACACCCGATCTGGAAGC	59.195	20	228	55	282	GTGTGTCAAGATTGTGCCTGA	58.779	21	AACACCCGATCTGGAAGCAT	59.379	20	225	56	280
scaf_0000052_32	p4	(GGAT)5	20	151	170	GCGCAACAATCTTGATCCCA	59.189	20	GAGCGTGAACTTGTTGCTCT	58.779	20	203	92	294	TGCGCAACAATCTTGATCCC	59.189	20	GAGCGTGAACTTGTTGCTCT	58.779	20	204	91	294	GCGCAACAATCTTGATCCCA	59.189	20	GCCCATGTCAAGCCATCATC	59.328	20	137	92	228
scaf_0000053_5	p3	(TTG)15	45	151	195	TTTGTTTACAAAGGGGGCGG	58.959	20	ATCGGGTGGGAGTGTTGAAA	59.231	20	212	87	298	TTTGTTTACAAAGGGGGCGG	58.959	20	TTTGATCGGGTGGGAGTGTT	59.231	20	216	87	302	GCTACTTGTAGACCCCGTGT	59.107	20	ATCGGGTGGGAGTGTTGAAA	59.231	20	239	60	298
scaf_0000053_8	p3	(CAT)5	15	151	165	GCACATGCACATCCACATCT	58.899	20	TCGGTCCTAGTTAACGTCGG	58.913	20	103	173	275	AGCACATGCACATCCACATC	58.899	20	TCGGTCCTAGTTAACGTCGG	58.913	20	104	172	275	TCAAGCACATGCACATCCAC	59.117	20	TCGGTCCTAGTTAACGTCGG	58.913	20	107	169	275
scaf_0000055_4	p3	(TAT)12	36	151	186	AGTCCATAAACCCGTGCAGT	59.309	20	AGTGGATGCAGAACACTAGGA	58.46	21	125	11	135	AGTCCATAAACCCGTGCAGT	59.309	20	CAGTGGATGCAGAACACTAGG	58.374	21	126	11	136	GTCCATAAACCCGTGCAGTT	58.47	20	AGTGGATGCAGAACACTAGGA	58.46	21	124	12	135
scaf_0000056_32	p3	(GGA)10	30	151	180	CCTGTGCTTGCAGACCTTTT	58.965	20	TCCAGGCCCACTTTCAGTAG	59.016	20	122	79	200	CCTGTGCTTGCAGACCTTTT	58.965	20	AACATACTTCCTGTCCGCCA	59.019	20	204	79	282	CCTGTGCTTGCAGACCTTTT	58.965	20	TCTTCAGCTTCACCACCACT	58.868	20	145	79	223
scaf_0000057_7	p3	(TCC)6	18	151	168	CTCCTCTTCCTCCTCCTCCT	59.066	20	GCAGTAGGGGCAGAAACAAC	59.118	20	100	143	242	TCTCCTCTTCCTCCTCCTCC	59.069	20	GCAGTAGGGGCAGAAACAAC	59.118	20	101	142	242	CAGCCTGCTCATTCTCCTCT	59.168	20	GGGGCAGAAACAACTGATGG	59.109	20	107	130	236
scaf_0000057_11	p3	(TTA)12	36	151	186	TCTTTGCCTCCGAATGCTTG	58.832	20	TCACCCCACTGTTATCGTCA	58.365	20	229	37	265	CTGCTCTTTGCCTCCGAATG	59.269	20	TCACCCCACTGTTATCGTCA	58.365	20	233	33	265	CTCTTTGCCTCCGAATGCTT	58.543	20	TCACCCCACTGTTATCGTCA	58.365	20	230	36	265
scaf_0000057_17	p3	(TTA)5	15	151	165	ACACATGCTTCCGATTACACT	57.665	21	AGTGAGAGAGAGAGAGAGAGTCA	58.903	23	131	176	306	ACACATGCTTCCGATTACACT	57.665	21	TGAGTGAGAGAGAGAGAGAGAGT	58.903	23	133	176	308	ACACATGCTTCCGATTACACT	57.665	21	TGAGAGAGAGAGAGAGAGTCAGA	58.647	23	129	176	304
scaf_0000057_18	p3	(TTA)5	15	14	28	ACATGTGTCCCACTCACTCT	58.278	20	CGACTGTCCCCCACCATTAA	59.384	20	195	118	312	ACATGTGTCCCACTCACTCTT	58.95	21	CGACTGTCCCCCACCATTAA	59.384	20	195	118	312	TGTGTCCCACTCACTCTTTCT	58.601	21	CGACTGTCCCCCACCATTAA	59.384	20	192	121	312
scaf_0000058_8	p3	(GAG)5	15	305	319	ACCAACCACCACTGCTTCTA	58.863	20	CACCGCATCAGTTTCGTTGA	59.135	20	181	106	286	ACCAACCACCACTGCTTCTA	58.863	20	GAAGCTGATGGTGTTACGGC	59.273	20	158	106	263	TCACTTGACTGGTTTCCCGA	58.875	20	CTCCTCCTCCTCAGCTTTGG	59.459	20	101	215	315
scaf_0000058_9	p3	(GAG)5	15	151	165	TCACTTGACTGGTTTCCCGA	58.875	20	CTCTTACCGAGAACGCAACC	58.653	20	132	61	192	TCACTTGACTGGTTTCCCGA	58.875	20	CCTCTTACCGAGAACGCAAC	58.653	20	133	61	193	TCACTTGACTGGTTTCCCGA	58.875	20	CTCCTCCTCCTCAGCTTTGG	59.459	20	101	61	161
scaf_0000058_34	p4	(TTTA)5	20	151	170	GCGGATTTCAAGTGATGCCA	59.189	20	TCAGGGATTAGTCGAGGTGC	58.888	20	248	43	290	TGCGGATTTCAAGTGATGCC	59.189	20	TCAGGGATTAGTCGAGGTGC	58.888	20	249	42	290	GCGGATTTCAAGTGATGCCA	59.189	20	CGCGCAAATTGACTCAGACA	59.487	20	229	43	271
scaf_0000059_9	p4	(AAAT)5	20	151	170	TGCCGGACATATCTACATCCC	59.1	21	AGCTTAGGGTCAGGCCAATT	58.997	20	237	0	236	GCCGGACATATCTACATCCCT	58.82	21	AGCTTAGGGTCAGGCCAATT	58.997	20	236	1	236	TGCCGGACATATCTACATCCC	59.1	21	TAGCAGGAACCTGTATGGCC	59.163	20	267	0	266
scaf_0000060_1	p4	(AAAC)5	20	151	170	AATCAAGGCCACAACGTGAC	59.048	20	GGACGAAGAGGAGCTTGTCT	59.108	20	191	64	254	AATCAAGGCCACAACGTGAC	59.048	20	TGGACGAAGAGGAGCTTGTC	59.396	20	192	64	255	AAGGCCACAACGTGACAAAC	59.546	20	GGACGAAGAGGAGCTTGTCT	59.108	20	187	68	254
scaf_0000060_2	p3	(TCT)5	15	151	165	CCCCACTCTCCATCCCTTTT	58.997	20	GAGAAGGATCTAGGCGGCTT	58.955	20	214	39	252	TTGTTTTTCAGGGCCAGTCG	58.971	20	GAGAAGGATCTAGGCGGCTT	58.955	20	234	19	252	CCCCACTCTCCATCCCTTTT	58.997	20	TGCCAGTGGATCCTCTGAAG	59.093	20	180	39	218
scaf_0000060_3	p3	(TCC)5	15	151	165	AAGCCGCCTAGATCCTTCTC	58.955	20	GTCCTGCCTTCAACGTTGTT	58.978	20	233	24	256	CTTTCCTCCTCCTCCTCCAC	58.8	20	GTCCTGCCTTCAACGTTGTT	58.978	20	110	147	256	CACCTTTCCTCCTCCTCCTC	58.8	20	GTCCTGCCTTCAACGTTGTT	58.978	20	113	144	256
scaf_0000061_13	p3	(CCA)6	18	151	168	TACCACCACATTGTTGCCAC	58.677	20	GTGTCGGCATTTGTGATGGT	59.119	20	133	180	312	TACCACCACATTGTTGCCAC	58.677	20	GTGGTGTCGGCATTTGTGAT	59.119	20	136	180	315	TACCACCACATTGTTGCCAC	58.677	20	TGTCGGCATTTGTGATGGTG	59.12	20	132	180	311
scaf_0000061_15	p3	(TAA)8	24	151	174	AGAGGAGCGAGAGAGAGAGG	59.53	20	TGGTTGAGTGATAGCAGTTGAA	57.65	22	100	16	115	AGAGGAGCGAGAGAGAGAGG	59.53	20	ATGGTTGAGTGATAGCAGTTGA	57.442	22	101	16	116	GAGGAGCGAGAGAGAGAGGA	59.532	20	ATGGTTGAGTGATAGCAGTTGA	57.442	22	100	17	116
scaf_0000061_22	p3	(AAG)8	24	151	174	AACACTGACCTGTTGCATGC	59.33	20	TCGGCTTTGACTCCTCTGTT	58.951	20	107	199	305	AACACTGACCTGTTGCATGC	59.33	20	ATCGGCTTTGACTCCTCTGT	58.729	20	108	199	306	TGTGGCATTTGCTGAATGGA	58.37	20	TCGGCTTTGACTCCTCTGTT	58.951	20	267	39	305
scaf_0000061_24	p3	(ACA)7	21	151	171	ACCATCGTGATCGGATGGAA	58.88	20	TGGGGATGGTGGTTGCTATT	58.993	20	104	95	198	AACCATCGTGATCGGATGGA	58.88	20	TGGGGATGGTGGTTGCTATT	58.993	20	105	94	198	TCCAACCATCGTGATCGGAT	58.88	20	TGGGGATGGTGGTTGCTATT	58.993	20	108	91	198
scaf_0000062_1	p3	(GGA)6	18	151	168	AAGGAGGTAGGTGCCGATTC	59.169	20	AACTCCTCCTCCTCCTCCTC	59.366	20	161	10	170	GAAGGAGGTAGGTGCCGATT	59.169	20	AACTCCTCCTCCTCCTCCTC	59.366	20	162	9	170	AAGGAGGTAGGTGCCGATTC	59.169	20	CATCACTGCCACCAAAGCTC	59.475	20	136	10	145
scaf_0000063_16	p3	(AAG)8	24	1	24	AAACTTGCTTCCCCTACCGT	59.231	20	AGTTTTGTGATTTCGTGGGGA	58.061	21	141	113	253	AACTTGCTTCCCCTACCGTA	58.352	20	AGTTTTGTGATTTCGTGGGGA	58.061	21	140	114	253	TGCTTCCCCTACCGTATCTC	58.299	20	AGTTTTGTGATTTCGTGGGGA	58.061	21	136	118	253
scaf_0000063_38	p3	(TGG)5	15	375	389	AAATTGGTAACGAGTGGGCG	58.838	20	CCACCACCACCCATTCATTG	59.103	20	271	42	312	AAATTGGTAACGAGTGGGCG	58.838	20	ACCACCACCACCCATTCATT	59.513	20	272	42	313	CAGGTGAGTGGTGATGGGAG	59.749	20	CCACCACCACCCATTCATTG	59.103	20	220	93	312
scaf_0000063_39	p3	(GGT)5	15	21	35	CAATGAATGGGTGGTGGTGG	59.103	20	CACCACCCACTCACTACCAC	59.965	20	177	69	245	CAATGAATGGGTGGTGGTGG	59.103	20	CACCCACTCACTACCACCC	59.322	19	174	69	242	CAATGAATGGGTGGTGGTGG	59.103	20	CCACCCACTCACTACCACC	59.322	19	175	69	243
scaf_0000063_39	p3	(TGG)5	15	151	165	CAATGAATGGGTGGTGGTGG	59.103	20	CACCACCCACTCACTACCAC	59.965	20	177	69	245	CAATGAATGGGTGGTGGTGG	59.103	20	CACCCACTCACTACCACCC	59.322	19	174	69	242	CAATGAATGGGTGGTGGTGG	59.103	20	CCACCCACTCACTACCACC	59.322	19	175	69	243
scaf_0000064_11	p3	(ATC)5	15	151	165	GGTGGGGTGTATAGTTTTGCC	58.903	21	TGATCCAAAGCCACTTCATTGA	58.235	22	102	182	283	GGTGGGGTGTATAGTTTTGCC	58.903	21	TGATTGATCCAAAGCCACTTCA	58.235	22	106	182	287	GGGTGGGGTGTATAGTTTTGC	58.903	21	TGATCCAAAGCCACTTCATTGA	58.235	22	103	181	283
scaf_0000065_8	p3	(CTG)5	15	151	165	CTCCTCAGACTCAAGGCTCC	59.177	20	GTATCGGCGACACCTTTTCC	58.995	20	126	25	150	CTCCTCAGACTCAAGGCTCC	59.177	20	CGGTAGGGAGGAGAGGTAGA	58.861	20	104	25	128	CTCCTCAGACTCAAGGCTCC	59.177	20	CAAATCCCACCTGCACTGAG	58.829	20	171	25	195
scaf_0000067_12	p3	(AAC)6	18	151	168	ACAACAACAACAACAACGCC	58.296	20	TGGGTTCAAGTCTTAGGACCA	58.303	21	120	151	270	ACAACAACAACAACAACGCC	58.296	20	TCAAGTCTTAGGACCACCACT	58.028	21	115	151	265	CAACAACAACAACAACGCCT	58.011	20	TGGGTTCAAGTCTTAGGACCA	58.303	21	119	152	270
scaf_0000068_12	p3	(TTC)12	36	151	186	ACCAAACCAAAAGGCTTTCTTC	57.863	22	GCACTAGAAGGACAAAGAGATGG	58.812	23	201	134	334	ACCAAACCAAAAGGCTTTCTTC	57.863	22	TGGAAGATAAAAGAGGGGAAGGA	58.555	23	181	134	314	CCAAACCAAAAGGCTTTCTTCT	57.593	22	GCACTAGAAGGACAAAGAGATGG	58.812	23	200	135	334
scaf_0000069_16	p4	(TTTA)5	20	151	170	GGGTTCAATGACCGCTTTCA	58.756	20	GGCAATGCAAAGGAGGACTT	58.739	20	164	129	292	GGGTTCAATGACCGCTTTCA	58.756	20	CAGGCAATGCAAAGGAGGAC	59.471	20	166	129	294	GGGTTCAATGACCGCTTTCA	58.756	20	ATCAGGCAATGCAAAGGAGG	58.518	20	168	129	296
scaf_0000070_4	p3	(CAC)5	15	151	165	TCCATCCCACAACTACCACC	59.011	20	ACAAATGAGCCCAACCAACC	58.952	20	115	112	226	CCTCCTCCACACCATCAACT	59.013	20	ACAAATGAGCCCAACCAACC	58.952	20	134	93	226	TCCTCCACACCATCAACTCC	59.016	20	ACAAATGAGCCCAACCAACC	58.952	20	132	95	226
scaf_0000070_22	p3	(TTC)8	24	151	174	GAAACATCGGCCCAAACAGT	59.041	20	CAAAACAGCGAAGGTCCGAA	59.058	20	167	56	222	GAAACATCGGCCCAAACAGT	59.041	20	TTCAAAACAGCGAAGGTCCG	59.058	20	169	56	224	GAAACATCGGCCCAAACAGT	59.041	20	GAAGCACCAGTCGAGAGAGA	58.83	20	141	56	196
scaf_0000071_10	p3	(AAT)6	18	151	168	AGTACCGGTCCAAGGTTCTT	58.274	20	GCCCTGCGCATAACTTAAGG	59.337	20	142	51	192	AGTACCGGTCCAAGGTTCTT	58.274	20	TGCCCTGCGCATAACTTAAG	58.621	20	143	51	193	ACCGGTCCAAGGTTCTTAGA	57.98	20	GCCCTGCGCATAACTTAAGG	59.337	20	139	54	192
scaf_0000073_5	p4	(ATAA)5	20	151	170	CCCTCAACCAAACACAACGT	58.9	20	TCATGTGAGAGAAGCTTGGGA	58.74	21	101	29	129	CGATGTGCTATCTTCCATGCC	59.197	21	TAATTGCATGCCCGGTGTTT	58.739	20	251	69	319	TCCCAAGCTTCTCTCACATGA	58.74	21	TAATTGCATGCCCGGTGTTT	58.739	20	211	109	319
scaf_0000073_6	p4	(TATT)5	20	151	170	GTATAGGGTGCTCAGGCCAT	58.94	20	GACAAGCGCAGATCCAAACA	59.126	20	100	127	226	AACACCGGGCATGCAATTAG	59.183	20	ACAAAAGGCGGGTGGATCTA	59.011	20	102	108	209	AACACCGGGCATGCAATTAG	59.183	20	AAACAAAAGGCGGGTGGATC	59.034	20	104	108	211
scaf_0000073_16	p3	(GTT)14	42	151	192	TACCCATGCCTCTGCTTTCA	59.009	20	GCAAGATCATCAAGCCGAGG	59.057	20	112	1	112	TACCCATGCCTCTGCTTTCA	59.009	20	GTGCAAGATCATCAAGCCGA	58.627	20	114	1	114	GTACCCATGCCTCTGCTTTC	58.616	20	GCAAGATCATCAAGCCGAGG	59.057	20	113	0	112
scaf_0000074_20	p3	(CAA)5	15	151	165	ACTCGACTCAACTACTCGGAC	58.925	21	TGTTGTTGTTGGGGATTGAACA	58.9	22	158	3	160	ACTCGACTCAACTACTCGGAC	58.925	21	TGTTGTTGTTGTTGGGGATTGA	58.9	22	161	3	163	CTCGACTCAACTACTCGGACT	58.651	21	TGTTGTTGTTGGGGATTGAACA	58.9	22	157	4	160
scaf_0000074_22	p3	(TGA)7	21	151	171	TCCAGATGTCCACCACAAGG	59.308	20	TGCTAGCTCTACTTGGTCCG	58.896	20	258	8	265	TCCAGATGTCCACCACAAGG	59.308	20	GCTAGCTCTACTTGGTCCGT	58.895	20	257	8	264	TCCAGATGTCCACCACAAGG	59.308	20	CAATCCGACAAGCAGCAGAA	58.841	20	278	8	285
scaf_0000076_1	p4	(TTTA)5	20	151	170	AGAATCATTTGCACCCCACA	57.693	20	TTCCCGGCATTTTAACCTGC	59.108	20	197	16	212	AGAATCATTTGCACCCCACA	57.693	20	CAAGAAGCTTCCCGGCATTT	59.109	20	205	16	220	AGAATCATTTGCACCCCACA	57.693	20	GCTTCCCGGCATTTTAACCT	58.817	20	199	16	214
scaf_0000076_10	p3	(AAT)6	18	283	300	CACTTTCGTACGTGCTAGATGA	58.245	22	GTTGACATTGTCATGGTGTTGA	57.433	22	260	0	259	CACTTTCGTACGTGCTAGATGA	58.245	22	AGTTGACATTGTCATGGTGTTG	57.427	22	261	0	260	CACTTTCGTACGTGCTAGATGAT	58.648	23	GTTGACATTGTCATGGTGTTGA	57.433	22	260	0	259
scaf_0000076_11	p3	(AAT)6	18	151	168	TCAACACCATGACAATGTCAAC	57.433	22	TGAGAGGTGATGCCACTTGT	58.941	20	176	106	281	CAACACCATGACAATGTCAACT	57.427	22	TGAGAGGTGATGCCACTTGT	58.941	20	175	107	281	TCAACACCATGACAATGTCAAC	57.433	22	AGAGGTGATGCCACTTGTCT	58.644	20	174	106	279
scaf_0000076_14	p3	(AAT)5	15	151	165	GCACCATGACAATGTCAGCT	58.829	20	TCCACTTGTCTAAACTTTGGCT	57.835	22	173	94	266	AGCACCATGACAATGTCAGC	58.829	20	TCCACTTGTCTAAACTTTGGCT	57.835	22	174	93	266	GCACCATGACAATGTCAGCT	58.829	20	TGGTCTTTAAGAGCTGATTCCAC	58.42	23	191	94	284
scaf_0000077_25	p4	(AATA)5	20	151	170	TCATCTCCCTTTCCCGTCAT	58.12	20	CAAAAGGTGGTGGTGGAAGG	58.96	20	201	41	241	ATCATCTCCCTTTCCCGTCA	58.12	20	CAAAAGGTGGTGGTGGAAGG	58.96	20	202	40	241	TGATCATCTCCCTTTCCCGT	58.12	20	CAAAAGGTGGTGGTGGAAGG	58.96	20	204	38	241
scaf_0000078_5	p3	(CTT)6	18	151	168	AAAACCTTCTGCGTGGGATG	58.752	20	GAGCGAAAGGAGGGAAGGAT	59.166	20	161	121	281	CAAAACCTTCTGCGTGGGAT	58.752	20	GAGCGAAAGGAGGGAAGGAT	59.166	20	162	120	281	AACCCAAAACCTTCTGCGTG	59.256	20	GAGCGAAAGGAGGGAAGGAT	59.166	20	166	116	281
scaf_0000079_12	p3	(AAT)7	21	151	171	ACCACCATATCTTGCCTAGCA	58.873	21	TGTGGTGTGCAATTCAGGTG	58.969	20	135	3	137	ACCACCATATCTTGCCTAGCA	58.873	21	GGTGTGCAATTCAGGTGACA	58.682	20	132	3	134	ACCACCATATCTTGCCTAGCA	58.873	21	TGGTGTGCAATTCAGGTGAC	58.682	20	133	3	135
scaf_0000081_29	p3	(TGG)5	15	151	165	GCGGTGGTGGTAGCATATTG	59.056	20	AAATTTGGGGGTGCGAACTC	59.034	20	280	10	289	TGATGGATCTAGAGGGGGCT	59.13	20	AAATTTGGGGGTGCGAACTC	59.034	20	118	172	289	GCGGTGGTGGTAGCATATTG	59.056	20	GGGGGTGCGAACTCCTATAA	58.874	20	274	10	283
scaf_0000083_8	p4	(AATT)5	20	151	170	GTCAACGTGGGAACAAGAAGA	58.443	21	GGGTTTTCACAATCTACCCTCC	58.646	22	118	1	118	AGTCAACGTGGGAACAAGAAG	58.438	21	GGGTTTTCACAATCTACCCTCC	58.646	22	119	0	118	GTCAACGTGGGAACAAGAAGA	58.443	21	TGTGGGTTTTCACAATCTACCC	58.508	22	121	1	121
scaf_0000085_4	p4	(TTTA)5	20	151	170	ACCGCCAACCAGTCAAATTC	59.041	20	TGAGTCAATGGAGCGACTGT	59.031	20	127	105	231	CGCCAACCAGTCAAATTCCA	59.042	20	TGAGTCAATGGAGCGACTGT	59.031	20	125	107	231	ACCGCCAACCAGTCAAATTC	59.041	20	CCATGTGGCGGTCTTTTGAA	59.042	20	175	105	279
scaf_0000085_28	p3	(AAT)6	18	151	168	AATAAATAAGGTGCGGGCGG	58.685	20	ATGTGGGCAGATACGGTTTG	58.25	20	100	165	264	AATAAATAAGGTGCGGGCGG	58.685	20	AATGTGGGCAGATACGGTTTG	58.908	21	101	165	265	TAATAAATAAGGTGCGGGCGG	58.504	21	TGTGGGCAGATACGGTTTGA	59.312	20	100	164	263
scaf_0000085_29	p3	(TTC)9	27	151	177	TCCTCCTTCCTCCAAAACTCT	58.008	21	GCTTGAATGGGAAGCGTTTTC	58.672	21	152	175	326	TCCTCCTTCCTCCAAAACTCT	58.008	21	GCTTGAATGGGAAGCGTTTT	57.561	20	152	175	326	CTTCTTCTTCCTCCTTCCTCCA	58.823	22	GCTTGAATGGGAAGCGTTTTC	58.672	21	160	167	326
scaf_0000087_3	p3	(ATC)5	15	151	165	GGGTTGGTTTGGGTCATGAC	59.034	20	TTGTCAAGCCAACCATTGCG	59.968	20	238	73	310	GCCAGCTACGATGCTAAACC	59.062	20	TTGTCAAGCCAACCATTGCG	59.968	20	263	48	310	GGCCAGCTACGATGCTAAAC	59.062	20	TTGTCAAGCCAACCATTGCG	59.968	20	264	47	310
scaf_0000087_34	p3	(TCT)11	33	151	183	CAATGCAGCAAGGTTTGGGA	59.319	20	TGCTGGTGTTCAATTTGCAGA	58.97	21	109	220	328	CCTCAAAGGCCAACAATGCA	59.319	20	TGCTGGTGTTCAATTTGCAGA	58.97	21	122	207	328	TGCAGCAAGGTTTGGGAAAT	58.577	20	TGCTGGTGTTCAATTTGCAGA	58.97	21	106	223	328
scaf_0000089_3	p3	(AAT)5	15	151	165	CACCGAGTTTACCTCATTGAGT	58.073	22	GCAAACTATACCACTAGTTCCGA	57.998	23	236	51	286	CACCGAGTTTACCTCATTGAGT	58.073	22	AGCAAACTATACCACTAGTTCCG	57.993	23	237	51	287	TCACCGAGTTTACCTCATTGAG	57.812	22	GCAAACTATACCACTAGTTCCGA	57.998	23	237	50	286
scaf_0000089_11	p4	(TATT)5	20	151	170	CGGCGTGCCAAACCATTATA	58.982	20	ACCAAGTAGGCACCCAAAGA	58.854	20	181	61	241	ATTTGGGGAGTGGACGTAGG	59.09	20	ACCAAGTAGGCACCCAAAGA	58.854	20	203	39	241	CGGCGTGCCAAACCATTATA	58.982	20	CAAGTAGGCACCCAAAGAGG	58.174	20	179	61	239
scaf_0000093_1	p4	(AGAC)5	20	151	170	ATCCTCAACCAAACCCCGAT	59	20	TGGTGACAGTGAGGAGATTGA	58.391	21	168	130	297	CACATCCTCAACCAAACCCC	58.743	20	TGGTGACAGTGAGGAGATTGA	58.391	21	171	127	297	ACAGACAGACAGACAGCAGT	58.592	20	TGGTGACAGTGAGGAGATTGA	58.391	21	142	156	297
scaf_0000093_3	p4	(ATTT)8	32	151	182	TGTCGCACTTGGATTTTCACT	58.429	21	CCAAGTGGCCTAAAACACCC	59.034	20	188	43	230	TGTCGCACTTGGATTTTCACTT	59.051	22	CCAAGTGGCCTAAAACACCC	59.034	20	188	43	230	TTGTCGCACTTGGATTTTCACT	59.051	22	CCAAGTGGCCTAAAACACCC	59.034	20	189	42	230
scaf_0000094_9	p3	(AAT)9	27	151	177	GGGAACCGAATGCAAAAGGA	58.747	20	TCCAGAGACGTGTTCATGCT	59.031	20	186	39	224	AGCATGAACACGTCTCTGGA	59.031	20	GGGGACACGTCTTGTAGAGT	58.745	20	111	205	315	GGGAACCGAATGCAAAAGGA	58.747	20	GGGGACACGTCTTGTAGAGT	58.745	20	277	39	315
scaf_0000094_11	p3	(TCT)7	21	151	171	TGTGAGGGTGAAGCATCTGT	58.941	20	GGTTGTTTGGTGGCTGTTCT	58.889	20	105	127	231	TTGGCCTATCCCTTGTGAGG	59.081	20	GGTTGTTTGGTGGCTGTTCT	58.889	20	118	114	231	CCTTGTGAGGGTGAAGCATC	58.543	20	GGTTGTTTGGTGGCTGTTCT	58.889	20	108	124	231
scaf_0000094_14	p3	(AAT)13	39	151	189	TCAGCACCCAAACAGAACAA	57.864	20	TGCCCGTCACATCAGATGAT	59.167	20	230	76	305	TCAGCACCCAAACAGAACAA	57.864	20	ATGCCCGTCACATCAGATGA	59.167	20	231	76	306	TCAGCACCCAAACAGAACAA	57.864	20	TGATGCCCGTCACATCAGAT	59.167	20	233	76	308
scaf_0000098_4	p3	(ACC)7	21	151	171	GGCTCGTCCGCTTCTACTAT	59.047	20	GGCGTATCCTCTCGTTCAGA	58.977	20	184	63	246	CCATCTCCATCTCCAGGTCC	58.945	20	GGCGTATCCTCTCGTTCAGA	58.977	20	138	109	246	CCCATCTCCATCTCCAGGTC	58.945	20	GGCGTATCCTCTCGTTCAGA	58.977	20	139	108	246
scaf_0000098_16	p3	(TCT)5	15	151	165	TGCTACGTCTTCTGCCTCAA	59.034	20	GACAATAGCACGGGCCTAAC	58.703	20	125	106	230	TGCTACGTCTTCTGCCTCAA	59.034	20	TAGCACGGGCCTAACATTGT	59.384	20	120	106	225	TGCTACGTCTTCTGCCTCAA	59.034	20	ACAATAGCACGGGCCTAACA	59.384	20	124	106	229
scaf_0000099_21	p3	(AAT)12	36	151	186	GGTCTAAGTTGCGCAACACA	59.058	20	TCAGGTCAAGGCTGTTGGAA	59.157	20	119	28	146	GGTCTAAGTTGCGCAACACA	59.058	20	TTCAGGTCAAGGCTGTTGGA	59.157	20	120	28	147	AGTTGCGCAACACATACTGG	59.126	20	TCAGGTCAAGGCTGTTGGAA	59.157	20	113	34	146
scaf_0000102_3	p3	(TTG)5	15	151	165	AGCAGCAGGAGCACTTCTAT	58.798	20	GGGGAATGCAAGTTTGGGTT	58.944	20	119	175	293	AGCAGCAGGAGCACTTCTAT	58.798	20	ATGGGGAATGCAAGTTTGGG	58.721	20	121	175	295	CAGCAGCAGGAGCACTTCTA	59.751	20	GGGGAATGCAAGTTTGGGTT	58.944	20	120	174	293
scaf_0000102_5	p3	(TTG)7	21	151	171	TCTCAAGGCTGAAGCTCACT	58.654	20	AGTGCTCTTACTGCGGAAGA	58.742	20	145	51	195	TCTCAAGGCTGAAGCTCACT	58.654	20	AGAAGTGCTCTTACTGCGGA	58.742	20	148	51	198	TCTCAAGGCTGAAGCTCACT	58.654	20	GAAGTGCTCTTACTGCGGAAG	59.004	21	147	51	197
scaf_0000104_1	p4	(TTTA)5	20	151	170	GGAGTTGTCAAAAACTTTGGCA	58.144	22	CCATTTCCATGCTTCAAAGTGG	58.408	22	184	88	271	GAGGAGTTGTCAAAAACTTTGGC	58.887	23	CCATTTCCATGCTTCAAAGTGG	58.408	22	186	86	271	AGGAGTTGTCAAAAACTTTGGC	57.877	22	CCATTTCCATGCTTCAAAGTGG	58.408	22	185	87	271
scaf_0000104_7	p3	(AAT)15	45	151	195	AGTTTGTGTGCCCAAAACGA	58.822	20	CAACAATGATCATGGGGGACA	58.262	21	105	22	126	AGTTTGTGTGCCCAAAACGA	58.822	20	TCAACAATGATCATGGGGGAC	57.983	21	106	22	127	AGTTTGTGTGCCCAAAACGA	58.822	20	CTCAACAATGATCATGGGGGAC	59.046	22	107	22	128
scaf_0000107_3	p3	(GAC)7	21	151	171	GTGAGAGGTACGGCATCAGA	58.896	20	ACACGTTCTTTGCAACTCCC	58.978	20	148	99	246	GAGTGAGAGGTACGGCATCA	58.896	20	ACACGTTCTTTGCAACTCCC	58.978	20	150	97	246	AGTGAGAGGTACGGCATCAG	58.893	20	ACACGTTCTTTGCAACTCCC	58.978	20	149	98	246
scaf_0000108_13	p3	(AAG)10	30	151	180	GCAGACACTACCCACCAAGA	59.315	20	CATGTGGCAACTCTTGGGAC	59.116	20	112	21	132	GCAGACACTACCCACCAAGA	59.315	20	GACCCATGTGGCAACTCTTG	59.116	20	116	21	136	GCAGACACTACCCACCAAGA	59.315	20	ATGTGGCAACTCTTGGGACT	59.226	20	111	21	131
scaf_0000110_2	p3	(AAT)7	21	151	171	GGTCAAGTTGGGTTGGGAAA	58.217	20	TTCTCCATCCCCATTCCCTT	58	20	102	189	290	GGTCAAGTTGGGTTGGGAAA	58.217	20	ATTCTCCATCCCCATTCCCT	57.764	20	103	189	291	GGGTCAAGTTGGGTTGGGAA	60.106	20	TTCTCCATCCCCATTCCCTT	58	20	103	188	290
scaf_0000110_5	p3	(CAC)6	18	151	168	CTCCATCTTCTCCACCTCCG	59.25	20	TGTACTCGCAGCACCCATAT	58.88	20	195	105	299	CTCCATCTTCTCCACCTCCG	59.25	20	CCAAAATGCAGCAACACGTC	58.869	20	153	105	257	ACCTCCCTCTCCATCACCTA	58.68	20	TGTACTCGCAGCACCCATAT	58.88	20	119	181	299
scaf_0000111_9	p4	(AAAT)6	24	151	174	ACGAGGCAGTAGAAGCAAAAC	58.856	21	GGATGGCCATTTTTCCCCTG	59.167	20	109	202	310	ACGAGGCAGTAGAAGCAAAAC	58.856	21	GCCATTTTTCCCCTGCTTCT	58.73	20	104	202	305	GAAGCAAAACTTGTCGCAGC	58.876	20	CTAGGGATGGCCATTTTTCCC	58.68	21	102	213	314
scaf_0000111_11	p3	(AAT)7	21	151	171	TGTAAAGGTCGTAACAGCCG	57.931	20	ACCTTGATAGCAACTCAAGTCT	57.101	22	222	33	254	GTAAAGGTCGTAACAGCCGT	57.93	20	ACCTTGATAGCAACTCAAGTCT	57.101	22	221	34	254	GTAAAGGTCGTAACAGCCGTT	58.593	21	ACCTTGATAGCAACTCAAGTCT	57.101	22	221	34	254
scaf_0000112_6	p3	(AAG)7	21	151	171	GTTTCCAGTGGGTTTGGACC	58.963	20	GGCAGCCTTCTTCTTCACAC	59.122	20	250	40	289	GCTGAGTTGTTTCCAGTGGG	59.046	20	GGCAGCCTTCTTCTTCACAC	59.122	20	258	32	289	GTTTCCAGTGGGTTTGGACC	58.963	20	CAGGCAGCCTTCTTCTTCAC	58.836	20	252	40	291
scaf_0000112_9	p3	(AGC)5	15	151	165	GGCGAAGAAAACGATGACGA	58.935	20	CACACCCTGAGCTAGAAGCA	59.39	20	100	42	141	GACGGCGAAGAAAACGATGA	58.935	20	CACACCCTGAGCTAGAAGCA	59.39	20	103	39	141	GATGACGGCGAAGAAAACGA	58.935	20	CACACCCTGAGCTAGAAGCA	59.39	20	106	36	141
scaf_0000112_15	p3	(TTA)6	18	151	168	GCATTGTTTGTAGTGCCCCA	59.035	20	CCAGTAGGCCACAAGGAAGA	59.016	20	150	85	234	TGCATTGTTTGTAGTGCCCC	59.035	20	CCAGTAGGCCACAAGGAAGA	59.016	20	151	84	234	GTGCCCCAAAATGTCATCGT	59.112	20	CCAGTAGGCCACAAGGAAGA	59.016	20	138	97	234
scaf_0000114_18	p3	(AAT)5	15	151	165	ACTATGCGTTGCACACAAGT	58.407	20	GTGTGGTTGTTGCCATGTCA	59.256	20	272	39	310	ACTATGCGTTGCACACAAGT	58.407	20	TGTGTGGTTGTTGCCATGTC	59.256	20	273	39	311	ACTATGCGTTGCACACAAGT	58.407	20	ATGTGTGTGGTTGTTGCCAT	58.588	20	276	39	314
scaf_0000117_3	p3	(GCT)6	18	151	168	ACACAATACAACACACACCCA	57.994	21	CCCTAGTGTTCCTAGCAGCA	58.805	20	104	77	180	ACACAATACAACACACACCCA	57.994	21	ACCCTAGTGTTCCTAGCAGC	58.804	20	105	77	181	ACACAATACAACACACACCCA	57.994	21	TAGTGTTCCTAGCAGCAGCA	58.734	20	101	77	177
scaf_0000117_9	p3	(GTT)7	21	151	171	TATGAGAGCGTCCACGAGTC	58.985	20	AGACTTGGAACTGGAGCACA	58.868	20	203	74	276	GTCTATGAGAGCGTCCACGA	58.985	20	AGACTTGGAACTGGAGCACA	58.868	20	206	71	276	CTATGAGAGCGTCCACGAGT	58.982	20	AGACTTGGAACTGGAGCACA	58.868	20	204	73	276
scaf_0000117_13	p3	(TGA)6	18	151	168	GCATCCCATAACGGTCCAAC	58.978	20	TCTGGAGGCTCCTTCATTGG	59.085	20	140	72	211	GCATCCCATAACGGTCCAAC	58.978	20	CCTCTCTCTTCACCTCGGTC	58.9	20	180	72	251	GCATCCCATAACGGTCCAAC	58.978	20	CATCTTGCCTCCTCCTCCAT	58.861	20	161	72	232
scaf_0000118_11	p4	(AATA)8	32	151	182	AGGGATAGAAATAAGCAGGGCA	58.944	22	TCGTGCAATGGTGGATGAAA	58.097	20	222	13	234	AGGGATAGAAATAAGCAGGGCA	58.944	22	TTCGTGCAATGGTGGATGAA	58.097	20	223	13	235	AGGGATAGAAATAAGCAGGGCA	58.944	22	TTTCGTGCAATGGTGGATGA	58.097	20	224	13	236
scaf_0000120_4	p3	(GAC)7	21	151	171	AACAACAGCGGCGAAGATTT	59.048	20	TATCGTCGTCGTCACCTCTG	58.995	20	131	111	241	TGGAAGATGTGTTGCAACGG	59.049	20	TATCGTCGTCGTCACCTCTG	58.995	20	169	73	241	AACAACAGCGGCGAAGATTT	59.048	20	CCTCCTTATCGTCGTCGTCA	58.988	20	137	111	247
scaf_0000120_5	p3	(GAC)7	21	27	47	CGACGATGACGATGGTGAAG	58.808	20	TCTCCTCACCATCATCGTCG	58.975	20	107	43	149	CAGAGGTGACGACGACGATA	58.995	20	AGCTTGCCAGTCATTAGGGA	58.711	20	261	98	358	TGACGACGACGATAAGGAGG	58.988	20	AGCTTGCCAGTCATTAGGGA	58.711	20	255	104	358
scaf_0000120_6	p3	(AAT)5	15	151	165	ATCCCTAATGACTGGCAAGCT	59.151	21	TTTGATCCCTAAATCAACCCCT	57.035	22	100	21	120	CCGAGTGTCCTAAAATCAATCCC	59.122	23	TCAACCCCTAGTGATCTGTCA	57.816	21	105	3	107	ATCCCTAATGACTGGCAAGC	57.645	20	TTTGATCCCTAAATCAACCCCT	57.035	22	100	21	120
scaf_0000120_22	p3	(GAG)5	15	151	165	GTCCGAGACTTCTGGCCTAG	59.258	20	ACTCTCCTCCTCCTCCTCTG	59.074	20	118	50	167	TTGTGTCGTCCGAGACTTCT	58.684	20	ACTCTCCTCCTCCTCCTCTG	59.074	20	125	43	167	GTCCGAGACTTCTGGCCTAG	59.258	20	CTCTCCTCCTCCTCCTCTGA	58.778	20	117	50	166
scaf_0000121_9	p3	(GAA)8	24	151	174	GGTGAATCAGCAAAAGGGGG	59.102	20	AGGAAAGGAGAGGAGCCCTA	58.98	20	222	58	279	GGGTGAATCAGCAAAAGGGG	59.102	20	AGGAAAGGAGAGGAGCCCTA	58.98	20	223	57	279	GGTGAATCAGCAAAAGGGGG	59.102	20	GCTGAGGTATTCTTCGCTGC	59.066	20	179	58	236
scaf_0000121_14	p4	(ATTT)5	20	151	170	TACGAATCCGGAGCTCCAAA	58.812	20	CCTAAAGGGCCCGTTTGTTT	58.666	20	107	5	111	CTACGAATCCGGAGCTCCAA	59.255	20	CCTAAAGGGCCCGTTTGTTT	58.666	20	108	4	111	CGAATCCGGAGCTCCAAAAC	59.273	20	CCTAAAGGGCCCGTTTGTTT	58.666	20	105	7	111
scaf_0000121_17	p3	(AGA)10	30	151	180	CATCATGCCGCCATGTTGAA	59.543	20	CTTCGATCTCAGGTAGGCGT	58.974	20	248	37	284	CATCATGCCGCCATGTTGAA	59.543	20	TGCTTCGATCTCAGGTAGGC	59.253	20	250	37	286	GCACAACACAAGCCCGTTAT	59.404	20	TTTCTGTCAATGGCGACGAG	58.572	20	100	216	315
scaf_0000121_27	p4	(AAAC)5	20	151	170	AGACCCACCTAAAACAACTTGT	57.755	22	GCCTAGGCAGGGTTTTTGTT	58.662	20	108	79	186	GACCCACCTAAAACAACTTGTT	57.005	22	GCCTAGGCAGGGTTTTTGTT	58.662	20	107	80	186	ACCCAATAATTCTAAGACCCACC	57.875	23	GCCTAGGCAGGGTTTTTGTT	58.662	20	122	65	186
scaf_0000122_21	p3	(CAG)5	15	151	165	CAGCAGCAGCATTAAAAAGCC	59.002	21	AGGGGAGATCGAAATCAGTGA	58.248	21	126	156	281	AATTCAACAGCAGCAGCAGC	60.039	20	AGGGGAGATCGAAATCAGTGA	58.248	21	139	143	281	GGAAAATTCAACAGCAGCAGC	58.936	21	AGGGGAGATCGAAATCAGTGA	58.248	21	143	139	281
scaf_0000122_31	p3	(TGG)6	18	151	168	ACTGGAAAGGGAGTCAGAGC	59.02	20	TCCCTAGTCTCCATCCACCA	58.984	20	147	43	189	CTGGAAAGGGAGTCAGAGCA	59.02	20	TCCCTAGTCTCCATCCACCA	58.984	20	146	44	189	ACTGGAAAGGGAGTCAGAGC	59.02	20	CCGTTCCCTAGTCTCCATCC	58.959	20	151	43	193
scaf_0000123_4	p4	(AAAT)6	24	151	174	TCGCAAATTGTCACCAACGT	58.982	20	TTGTTGGGATGGCTTGACAC	58.673	20	274	3	276	TCGCAAATTGTCACCAACGT	58.982	20	GTTGTTGGGATGGCTTGACA	58.673	20	275	3	277	TCGCAAATTGTCACCAACGT	58.982	20	TTTGGGGTGTTGCTTGGTAC	58.595	20	246	3	248
scaf_0000124_11	p3	(TGA)7	21	151	171	GTCCGTTGACCGAATTTGCT	59.128	20	ACAGACCCCATAGTGTGACC	58.723	20	118	107	224	GTCCGTTGACCGAATTTGCT	59.128	20	CAGACCCCATAGTGTGACCC	59.458	20	117	107	223	GAGCCGAACAATAGTCGCAC	59.354	20	ACAGACCCCATAGTGTGACC	58.723	20	170	55	224
scaf_0000124_17	p4	(TTAT)6	24	266	289	GGAAGCCTTTCATGTTCCACA	58.761	21	ATGTTCAGTCCCTTCTCCCC	58.71	20	103	74	176	TGGAAGCCTTTCATGTTCCAC	58.761	21	ATGTTCAGTCCCTTCTCCCC	58.71	20	104	73	176	AGCCTTTCATGTTCCACACT	57.336	20	ATGTTCAGTCCCTTCTCCCC	58.71	20	100	77	176
scaf_0000124_18	p4	(TTAT)6	24	151	174	GGGGAGAAGGGACTGAACAT	58.71	20	AGCTTGAGGTCATGTGAGACA	59.026	21	185	42	226	GGGGAGAAGGGACTGAACAT	58.71	20	GCTTGAGGTCATGTGAGACA	57.538	20	184	42	225	GGGGGAGAAGGGACTGAAC	59.008	19	AGCTTGAGGTCATGTGAGACA	59.026	21	186	41	226
scaf_0000124_20	p3	(ATA)8	24	151	174	GACGAAACACTGGTCTGCTC	58.859	20	CCGAATGACAGCGAACTCAT	58.355	20	168	65	232	GAAGCGTGCCCTTAACAGAC	59.203	20	CCGAATGACAGCGAACTCAT	58.355	20	185	48	232	GACGAAACACTGGTCTGCTC	58.859	20	TAACCCGAATGACAGCGAAC	58.283	20	172	65	236
scaf_0000124_42	p3	(GTT)5	15	151	165	TCGTGCTGTTTCTAGACCCC	59.393	20	GCCCCAACAACAACAACAAC	58.635	20	112	58	169	CCCACTACTTTGACTCGTGC	58.571	20	GCCCCAACAACAACAACAAC	58.635	20	126	44	169	TCGTGCTGTTTCTAGACCCC	59.393	20	GTAAGGCCCCAACAACAACA	58.595	20	117	58	174
scaf_0000125_7	p3	(TTC)5	15	151	165	ACAGTGTCATCTCCACCACA	58.576	20	AGGCTCAAAGATGTCCGTGA	59.023	20	113	123	235	ACAGTGTCATCTCCACCACA	58.576	20	GGCTCAAAGATGTCCGTGAC	58.92	20	112	123	234	ACAGTGTCATCTCCACCACA	58.576	20	AGAGGCTCAAAGATGTCCGT	58.729	20	115	123	237
scaf_0000126_24	p3	(GAA)9	27	151	177	CCAACGGTCTCAGCAATAGC	58.99	20	CTCCGTGGATCCCTAGGTTG	59.247	20	116	28	143	CCAACGGTCTCAGCAATAGC	58.99	20	TTCTTCAGACTCCTCCGTGG	58.742	20	128	28	155	ATCCTGACCTACCACCAACG	59.097	20	CTCCGTGGATCCCTAGGTTG	59.247	20	130	14	143
scaf_0000126_30	p3	(CAC)5	15	151	165	CACCACCACTCTCACTCTGT	58.956	20	TTGGGCCACCTGAGAATACC	59.376	20	119	156	274	GATGTAGCCACCCCCACATA	58.863	20	TTGGGCCACCTGAGAATACC	59.376	20	147	128	274	AGCCACCCCCACATATACAC	59.156	20	TTGGGCCACCTGAGAATACC	59.376	20	142	133	274
scaf_0000126_31	p3	(CCA)8	24	151	174	TCACCACCACATTGTTGCAG	58.969	20	GTAGCTCAGGGGATCGTACC	59.04	20	126	197	322	TCACCACCACATTGTTGCAG	58.969	20	GATCGTACCGGCATTGGAAC	59.065	20	115	197	311	TTGTTGCAGCCTATCGAAGC	58.913	20	GTAGCTCAGGGGATCGTACC	59.04	20	115	208	322
scaf_0000126_38	p3	(TTA)6	18	273	290	GGCAGTTGCTCTTTTGGTCA	58.968	20	TCAGAGTTCACACACCAGCT	58.877	20	242	18	259	TGGCAGTTGCTCTTTTGGTC	58.968	20	TCAGAGTTCACACACCAGCT	58.877	20	243	17	259	AATGGGTTTTGGCAGTTGCT	58.869	20	TCAGAGTTCACACACCAGCT	58.877	20	252	8	259
scaf_0000126_39	p3	(TTA)6	18	151	168	GCAACTGGCAATGTTAGCTT	57.269	20	TCAGAGTTCACACACCAGCT	58.877	20	137	1	137	GCAACTGGCAATGTTAGCTT	57.269	20	GTTCACACACCAGCTTGCAT	59.33	20	132	1	132	GCAACTGGCAATGTTAGCTT	57.269	20	TTCACACACCAGCTTGCATT	58.598	20	131	1	131
scaf_0000126_39	p3	(CTT)5	15	279	293	GCAACTGGCAATGTTAGCTT	57.269	20	TCAGAGTTCACACACCAGCT	58.877	20	137	1	137	GCAACTGGCAATGTTAGCTT	57.269	20	GTTCACACACCAGCTTGCAT	59.33	20	132	1	132	GCAACTGGCAATGTTAGCTT	57.269	20	TTCACACACCAGCTTGCATT	58.598	20	131	1	131
scaf_0000126_40	p3	(TTA)6	18	23	40	TCCACCTTCCTCAGAACATACT	58.209	22	TGCATCTCCAAACCATGAGC	58.533	20	242	56	297	CTTTTCCACCTTCCTCAGAACA	58.179	22	TGCATCTCCAAACCATGAGC	58.533	20	246	52	297	TCCACCTTCCTCAGAACATACT	58.209	22	CTCCAAACCATGAGCGTTGA	58.477	20	237	56	292
scaf_0000126_40	p3	(CTT)5	15	151	165	TCCACCTTCCTCAGAACATACT	58.209	22	TGCATCTCCAAACCATGAGC	58.533	20	242	56	297	CTTTTCCACCTTCCTCAGAACA	58.179	22	TGCATCTCCAAACCATGAGC	58.533	20	246	52	297	TCCACCTTCCTCAGAACATACT	58.209	22	CTCCAAACCATGAGCGTTGA	58.477	20	237	56	292
scaf_0000127_1	p3	(TGC)5	15	151	165	AGGCACCCCAAGTTTGTAGA	58.854	20	TAAAGTTAGGCCCCAACCCA	58.542	20	132	75	206	CAAGGCACCCCAAGTTTGTA	58.301	20	TAAAGTTAGGCCCCAACCCA	58.542	20	134	73	206	CTCAAACCACCACACATGCA	58.969	20	GGACAGAAAAATTTGGCGCA	57.853	20	185	126	310
scaf_0000128_24	p3	(TGA)5	15	151	165	TTGCAATAGTCGGTTTGGCG	59.48	20	TGCCAAGCAGGTGCATAAAA	58.664	20	111	78	188	CAATAGTCGGTTTGGCGACG	59.631	20	TGCCAAGCAGGTGCATAAAA	58.664	20	108	81	188	TTGCAATAGTCGGTTTGGCG	59.48	20	CGGCCCTTGACATTACAACA	58.471	20	179	78	256
scaf_0000132_1	p3	(AAC)8	24	151	174	CCAGCAACCACCTTTAGCAG	59.116	20	TTGGCCCTTCTAGTTGGGAG	59.008	20	196	102	297	GCAACCACCTTTAGCAGCAA	59.327	20	TTGGCCCTTCTAGTTGGGAG	59.008	20	193	105	297	CCACAACCAGAGGTCCTGTA	58.652	20	TTGGCCCTTCTAGTTGGGAG	59.008	20	270	28	297
scaf_0000132_8	p3	(GGT)5	15	151	165	ACAGTGATGGAGGTTGAGGG	59.013	20	TTCATAGCTGGCCTTGACCA	59.009	20	139	87	225	GTGGTAGTGGTAGTGGCAGT	59.026	20	TTCATAGCTGGCCTTGACCA	59.009	20	207	19	225	TGGTAGTGGTAGTGGCAGTG	59.026	20	TTCATAGCTGGCCTTGACCA	59.009	20	206	20	225
scaf_0000132_34	p3	(CCA)5	15	151	165	TACTACCATCCACCGCCTAC	58.304	20	CGGACGGGTAAGTAGTGGTT	59.109	20	124	5	128	TACTACCATCCACCGCCTAC	58.304	20	TGACGGACGGGTAAGTAGTG	58.832	20	127	5	131	TACTACCATCCACCGCCTAC	58.304	20	GTGACGGACGGGTAAGTAGT	58.831	20	128	5	132
scaf_0000132_35	p4	(CACC)5	20	151	170	CCATCACCATCCACCACCTA	58.788	20	TGGGTGGTAACGAGTGAGTG	59.323	20	118	18	135	ATCACCATCCACCACCTACC	58.787	20	TGGGTGGTAACGAGTGAGTG	59.323	20	116	20	135	CCATCACCATCCACCACCTA	58.788	20	GGTGATGGGTGGTAACGAGT	59.388	20	123	18	140
scaf_0000132_36	p3	(ACC)6	18	151	168	ATCACCACCAGCCACCTAC	59.009	19	GCGGGTGGTAGTAGTAGGTG	59.257	20	210	9	218	CATCACCACCAGCCACCTA	59.01	19	GCGGGTGGTAGTAGTAGGTG	59.257	20	211	8	218	ATCACCACCAGCCACCTAC	59.009	19	GTAGTAGTGGGTGGTGGGTG	59.388	20	240	9	248
scaf_0000132_37	p3	(CCA)6	18	151	168	CACCACTACCACTACCACCA	58.656	20	AGTGAGAAATGGCAAGTGGC	58.749	20	206	38	243	ACCACTACCACTACCACCAC	58.655	20	AGTGAGAAATGGCAAGTGGC	58.749	20	205	39	243	CACTACCACTACCACCACCC	59.388	20	AGTGAGAAATGGCAAGTGGC	58.749	20	203	41	243
scaf_0000133_5	p3	(CCT)11	33	151	183	AATCCCCAAACTGCCAAACC	58.944	20	TGAGAGCAACACCTGTAGCA	58.952	20	147	85	231	GCGTGACTGAAAGAATCCCC	58.912	20	TGAGAGCAACACCTGTAGCA	58.952	20	160	72	231	AATCCCCAAACTGCCAAACC	58.944	20	TATGGAGGAGGAGGAGGAGG	58.837	20	103	85	187
scaf_0000133_6	p3	(ATT)8	24	151	174	ATACACTGGCCATAGGGGTG	58.86	20	ATGCAACCATATGTGCGCAC	59.899	20	211	102	312	CATACACTGGCCATAGGGGT	58.86	20	ATGCAACCATATGTGCGCAC	59.899	20	212	101	312	ATACACTGGCCATAGGGGTG	58.86	20	CATGCAACCATATGTGCGCA	59.899	20	212	102	313
scaf_0000133_24	p4	(TCAA)5	20	151	170	ACTTGTTCGCTTTGCCTGTG	59.618	20	TGGCTTCTTGACCTAGTTGTG	57.874	21	107	210	316	CACTTGTTCGCTTTGCCTGT	59.618	20	TGGCTTCTTGACCTAGTTGTG	57.874	21	108	209	316	ACTTGTTCGCTTTGCCTGTG	59.618	20	GGCTTCTTGACCTAGTTGTGT	57.873	21	106	210	315
scaf_0000133_25	p4	(TCAA)6	24	151	174	AAGTGGAGTTCAAGCTTGCT	57.645	20	AGGGTTTTGGCTCTGATACCA	59.007	21	270	44	313	GTGGAGTTCAAGCTTGCTACT	58.228	21	AGGGTTTTGGCTCTGATACCA	59.007	21	268	46	313	AGTGGAGTTCAAGCTTGCTAC	58.228	21	AGGGTTTTGGCTCTGATACCA	59.007	21	269	45	313
scaf_0000134_24	p3	(TGT)6	18	151	168	TGGTGGACGTCTTTGAGTGT	59.172	20	GCCTCTCCAGCTGACAAAAC	59.122	20	118	133	250	TGGTGGACGTCTTTGAGTGT	59.172	20	ACAAAACTCGCGGCGATTTA	58.85	20	105	133	237	TACGAGAGTAGGCCGAAAGC	59.263	20	CGCGGCGATTTATGAGACAA	59.072	20	198	32	229
scaf_0000135_5	p3	(TGG)5	15	151	165	GAACAACTCCAACCCAAGCC	59.326	20	AGTGTGGGGATGAGTTCCTG	59.013	20	184	33	216	GAACAACTCCAACCCAAGCC	59.326	20	GTGTGGGGATGAGTTCCTGA	59.016	20	183	33	215	GAACAACTCCAACCCAAGCC	59.326	20	CCCACCGTCCATTGGAAAAA	58.667	20	105	33	137
scaf_0000135_24	p3	(AGA)5	15	151	165	AGGGTTCTCACGGTGGTAAG	59.026	20	TGCCTTACCACTGCTAGCTT	59.016	20	176	102	277	GGTTCTCACGGTGGTAAGGA	59.029	20	TGCCTTACCACTGCTAGCTT	59.016	20	174	104	277	GAGGGTTCTCACGGTGGTAA	59.029	20	TGCCTTACCACTGCTAGCTT	59.016	20	177	101	277
scaf_0000135_25	p3	(GTG)5	15	151	165	ATGTTTGGTGGTTGTGGTGG	58.881	20	CACACTACCACCGCTACTCT	58.825	20	118	73	190	ATGTTTGGTGGTTGTGGTGG	58.881	20	TACCACACTACCACCGCTAC	58.823	20	121	73	193	ATGTTTGGTGGTTGTGGTGG	58.881	20	CTACTCTCACCTCCACCACC	58.813	20	105	73	177
scaf_0000140_5	p4	(AAAT)6	24	151	174	TTGGTTTCAGGCGGACTTTG	58.971	20	CCCTTAGGCCCACTAACAGT	58.714	20	174	51	224	GTTTCAGGCGGACTTTGGAG	59.125	20	CCCTTAGGCCCACTAACAGT	58.714	20	171	54	224	TTGGTTTCAGGCGGACTTTG	58.971	20	TCCCTTAGGCCCACTAACAG	58.42	20	175	51	225
scaf_0000140_7	p3	(ACA)5	15	151	165	AGAAGTGGACTGTACCCATATGA	58.379	23	AGCCATACAGAGCAGACACT	58.434	20	110	200	309	AGAAGTGGACTGTACCCATATGA	58.379	23	CAGAGCAGACACTTCAAGCA	58.125	20	103	200	302	AGAAGTGGACTGTACCCATATGA	58.379	23	ACAGAGCAGACACTTCAAGC	58.124	20	104	200	303
scaf_0000141_1	p3	(ATA)5	15	151	165	AGTGTGGACGATTTTTGCGG	59.409	20	ACCGCCCAACCCGTATATAG	59.029	20	132	170	301	AGTGTGGACGATTTTTGCGG	59.409	20	CCGCCCAACCCGTATATAGA	58.74	20	131	170	300	GTGGACGATTTTTGCGGGTT	59.687	20	ACCGCCCAACCCGTATATAG	59.029	20	129	173	301
scaf_0000141_2	p3	(GGA)6	18	151	168	TTTTGTGGCGAAGAAGACGG	59.058	20	CCTTCACATCCTCCTCCTCC	58.873	20	161	15	175	TGTGGAAGGAGATTGTGGCT	58.933	20	CCTTCACATCCTCCTCCTCC	58.873	20	132	44	175	TTTTGTGGCGAAGAAGACGG	59.058	20	TGAATCAACACTCTGCTGCG	58.849	20	262	15	276
scaf_0000141_8	p4	(AAAT)5	20	151	170	ACCCAAACAAGCAAAAGGAGT	58.533	21	ACAGTGGTTGGCATAACGTG	58.765	20	180	81	260	ACCCAAACAAGCAAAAGGAGTT	59.162	22	ACAGTGGTTGGCATAACGTG	58.765	20	180	81	260	AACCCAAACAAGCAAAAGGAGT	59.162	22	ACAGTGGTTGGCATAACGTG	58.765	20	181	80	260
scaf_0000141_9	p3	(ATT)5	15	151	165	AATGGGCACGAAGACCACTA	59.019	20	TCGGCTGAACTTGTCCAAAT	57.73	20	229	39	267	AATGGGCACGAAGACCACTA	59.019	20	ATCGGCTGAACTTGTCCAAA	57.73	20	230	39	268	AATGGGCACGAAGACCACTA	59.019	20	AATCGGCTGAACTTGTCCAA	57.73	20	231	39	269
scaf_0000141_14	p3	(TAA)13	39	151	189	GGTTCACCGTTAGATATGGCC	58.509	21	TGCCACAGCATTGTTTTGGT	59.171	20	140	129	268	TGGTTCACCGTTAGATATGGC	57.812	21	TGCCACAGCATTGTTTTGGT	59.171	20	141	128	268	GTTCACCGTTAGATATGGCCT	57.529	21	TGCCACAGCATTGTTTTGGT	59.171	20	139	130	268
scaf_0000141_14	p3	(TTA)9	27	313	339	GGTTCACCGTTAGATATGGCC	58.509	21	TGCCACAGCATTGTTTTGGT	59.171	20	140	129	268	TGGTTCACCGTTAGATATGGC	57.812	21	TGCCACAGCATTGTTTTGGT	59.171	20	141	128	268	GTTCACCGTTAGATATGGCCT	57.529	21	TGCCACAGCATTGTTTTGGT	59.171	20	139	130	268
scaf_0000141_15	p3	(TAA)9	27	1	27	CACCAAAACAATGCTGTGGC	58.78	20	CTTTACCCGAGATTTGCCCG	58.986	20	202	86	287	CACCAAAACAATGCTGTGGC	58.78	20	AGCAGCCTTTACCCGAGATT	59.088	20	208	86	293	CACCAAAACAATGCTGTGGC	58.78	20	TACCCGAGATTTGCCCGATT	59.165	20	199	86	284
scaf_0000141_15	p3	(TTA)12	36	151	186	CACCAAAACAATGCTGTGGC	58.78	20	CTTTACCCGAGATTTGCCCG	58.986	20	202	86	287	CACCAAAACAATGCTGTGGC	58.78	20	AGCAGCCTTTACCCGAGATT	59.088	20	208	86	293	CACCAAAACAATGCTGTGGC	58.78	20	TACCCGAGATTTGCCCGATT	59.165	20	199	86	284
scaf_0000145_7	p3	(ACC)6	18	151	168	GACATTGACACCACCACCAC	59.048	20	AAAGTGGTTGGCGGCAATAG	59.112	20	111	78	188	GACATTGACACCACCACCAC	59.048	20	CTAAAGTGGTTGGCGGCAAT	59.112	20	113	78	190	GACATTGACACCACCACCAC	59.048	20	ACGTCGAGACACAACTAGCT	58.763	20	131	78	208
scaf_0000145_12	p3	(TTC)8	24	151	174	ATTTGTGGACATGCGTTGCA	59.327	20	CGGAAGCAGGTAATTTGCGA	58.917	20	114	0	113	ATTTGTGGACATGCGTTGCA	59.327	20	TCGGAAGCAGGTAATTTGCG	58.917	20	115	0	114	TGGACATGCGTTGCACTTTA	58.401	20	CGGAAGCAGGTAATTTGCGA	58.917	20	109	5	113
scaf_0000145_13	p3	(TTC)8	24	13	36	TCTTCGTCTTCTCCTGCTGT	58.378	20	ACAAAACAAGAACCAGGGAAGG	58.969	22	136	90	225	TGTCTTCGTCTTCTCCTGCT	58.378	20	ACAAAACAAGAACCAGGGAAGG	58.969	22	138	88	225	TCTTCGTCTTCTCCTGCTGT	58.378	20	CAAAACAAGAACCAGGGAAGGA	58.704	22	135	90	224
scaf_0000145_20	p3	(CTT)5	15	151	165	GCAAAGTCAGGGTTCGATGG	59.195	20	GCCTCTCTGTCTTCTGTGGT	59.027	20	171	31	201	ACATGCAAAGTCAGGGTTCG	58.762	20	GCCTCTCTGTCTTCTGTGGT	59.027	20	175	27	201	GCAAAGTCAGGGTTCGATGG	59.195	20	CGAGCCTCTCTGTCTTCTGT	58.827	20	174	31	204
scaf_0000145_24	p3	(TCA)7	21	312	332	GAGAGAAAGAGAGAGAGAGAGGG	58.544	23	CAACAGTGACACCATCCGAC	58.852	20	100	169	268	CGGAGATTGGTGAAGCTTGG	58.91	20	GGTGATGGTGATGATGATGATGA	58.351	23	118	222	339	GATTGGTGAAGCTTGGCCTC	59.186	20	GGTGATGGTGATGATGATGATGA	58.351	23	114	226	339
scaf_0000146_1	p3	(CAT)5	15	151	165	CACGTGCAACAGAATAGGGG	58.913	20	TGGCCAAAGTGATGATGATGA	57.631	21	127	49	175	GGATGTCACGTGCAACAGAA	58.774	20	TGGCCAAAGTGATGATGATGA	57.631	21	133	43	175	CACGTGCAACAGAATAGGGG	58.913	20	TGAATGGCCAAAGTGATGATGA	58.301	22	131	49	179
scaf_0000146_6	p3	(AAT)6	18	151	168	CCGGTATGAGTTAGTTTGAGAGT	57.674	23	TGACAAAAAGCACCGTAAACAC	58.239	22	192	2	193	ACCGGTATGAGTTAGTTTGAGAG	57.674	23	TGACAAAAAGCACCGTAAACAC	58.239	22	193	1	193	CCGGTATGAGTTAGTTTGAGAGT	57.674	23	GACAAAAAGCACCGTAAACACT	57.976	22	191	2	192
scaf_0000146_11	p3	(AAT)6	18	151	168	ATCGGGTCACAAATTGCAGG	58.823	20	TCAAGGCCTAACAGTATGATCCA	58.963	23	145	46	190	GGGTCACAAATTGCAGGGAA	58.663	20	TCAAGGCCTAACAGTATGATCCA	58.963	23	142	49	190	ATCGGGTCACAAATTGCAGG	58.823	20	CAAGGCCTAACAGTATGATCCA	57.578	22	144	46	189
scaf_0000146_21	p4	(TTTA)5	20	151	170	TAGCTTGGGTGGACTTGGAG	59.016	20	CCTTGGCCTGTACACAACAT	58.09	20	101	123	223	TAGCTTGGGTGGACTTGGAG	59.016	20	CCCTTGGCCTGTACACAACA	60.179	20	102	123	224	TAGCTTGGGTGGACTTGGAG	59.016	20	CCTTGGCCTGTACACAACATT	58.761	21	101	123	223
scaf_0000148_6	p3	(ATT)5	15	151	165	CCCGGCTGATTTTGGGAAAT	58.806	20	ATGTGCTTGTGTGTGGAGTG	58.688	20	108	198	305	CCCGGCTGATTTTGGGAAAT	58.806	20	GCTTGTGTGTGGAGTGGAAA	58.611	20	104	198	301	ACTTGAAGGAGAGAAGCCCG	59.389	20	ATGTGCTTGTGTGTGGAGTG	58.688	20	124	182	305
scaf_0000148_23	p3	(TAT)5	15	151	165	TACCCTTGTGCTGACCCAAA	59.153	20	TCTGAGCGGGAATTGATGGT	59.088	20	135	82	216	TTACCCTTGTGCTGACCCAA	59.153	20	TCTGAGCGGGAATTGATGGT	59.088	20	136	81	216	TTTACCCTTGTGCTGACCCA	59.153	20	TCTGAGCGGGAATTGATGGT	59.088	20	137	80	216
scaf_0000149_11	p3	(ATA)7	21	151	171	ACGTCTCCTCAGAAACCACA	58.59	20	CCACTTTGTGCTTGCTCCTT	58.965	20	114	13	126	ACGTCTCCTCAGAAACCACA	58.59	20	TTATTATGGGTGGGCAGGGG	59.143	20	144	13	156	ACGTCTCCTCAGAAACCACA	58.59	20	GTGGGCAGGGGTCATCTATT	59.153	20	135	13	147
scaf_0000152_17	p3	(ATA)5	15	151	165	AACAGTCGAACACCCCAGAC	59.894	20	ACAGAGAGAGAGGGGGAGAG	59.074	20	108	0	107	AACAGTCGAACACCCCAGAC	59.894	20	GACAGAGAGAGAGGGGGAGA	59.077	20	109	0	108	ACGACTTCGAAAGCCTCTCT	58.751	20	GAGCAGAGACGACAGAGAGA	58.267	20	101	18	118
scaf_0000153_2	p3	(TGT)5	15	292	306	TGAAGTAAAGGGCCGTTGGA	59.234	20	GCCAGAATCTCCATGATTGACA	58.451	22	149	116	264	TGAAGTAAAGGGCCGTTGGA	59.234	20	AGCCAGAATCTCCATGATTGAC	58.182	22	150	116	265	TTGAAGTAAAGGGCCGTTGG	58.388	20	GCCAGAATCTCCATGATTGACA	58.451	22	150	115	264
scaf_0000153_3	p3	(TGT)5	15	151	165	TGTCAATCATGGAGATTCTGGC	58.451	22	CCTCCACCAATAGCCAAAACA	58.476	21	113	102	214	TGTCAATCATGGAGATTCTGGC	58.451	22	TGCAACTTCTAACACACAGCA	58.362	21	141	102	242	GTCAATCATGGAGATTCTGGCT	58.182	22	CCTCCACCAATAGCCAAAACA	58.476	21	112	103	214
scaf_0000156_16	p3	(ACA)5	15	296	310	ACAAGACTCTTGCCACCTGA	58.868	20	CCGTTGGGACCTTCTTGTTG	59.048	20	202	43	244	ACAAGACTCTTGCCACCTGA	58.868	20	TCCGTTGGGACCTTCTTGTT	59.159	20	203	43	245	ACAAGACTCTTGCCACCTGA	58.868	20	TTCTTGTTTGGTCCGTTGGG	58.605	20	214	43	256
scaf_0000157_3	p3	(CAC)20	60	151	210	GCCACTACCACCAACATCAC	58.835	20	GTTAGCTGTAGTGGCGGTTG	58.924	20	223	113	335	GCCACTACCACCAACATCAC	58.835	20	ATGTTAGCTGTAGTGGCGGT	59.097	20	225	113	337	CGTCACTCCACTACCACCAT	59.104	20	GTGATGTTGGTGGTAGTGGC	58.835	20	103	30	132
scaf_0000157_4	p3	(ACC)7	21	151	171	ATTGCCACCACCATTGTCAC	59.032	20	AAATTGCCGTGTCCCATGTC	59.112	20	221	26	246	CATTGCCACCACCATTGTCA	59.032	20	AAATTGCCGTGTCCCATGTC	59.112	20	222	25	246	ATTGCCACCACCATTGTCAC	59.032	20	AGTGGAGGTTGTGTGGTGAT	58.86	20	107	26	132
scaf_0000157_6	p3	(ACC)6	18	151	168	CTACCATCACAACCGCCATG	58.983	20	CTAGTCAGCCACGTGGAGAT	58.893	20	139	168	306	CTACCATCACAACCGCCATG	58.983	20	TAGTCAGCCACGTGGAGATG	59.182	20	138	168	305	CCACATCCCCTACCGTCATT	59.163	20	CTAGTCAGCCACGTGGAGAT	58.893	20	119	188	306
scaf_0000158_5	p3	(GGA)11	33	151	183	TCTACTCAGATCTGCCGTGG	58.606	20	TCCCCAGTCTCTCTCACTCA	58.924	20	241	72	312	TCTACTCAGATCTGCCGTGG	58.606	20	TCACTCTTCTCTCCGCAGTG	59.115	20	177	72	248	TCTACTCAGATCTGCCGTGG	58.606	20	CACTCACTCTTCTCTCCGCA	59.115	20	180	72	251
scaf_0000159_1	p3	(TCC)5	15	151	165	TATGCGGTCCCAAAGTGGAT	59.084	20	TGGCTTCTAACGACCAAGGT	58.947	20	186	67	252	GGTAGATCACCCATGTCGGT	58.879	20	TGGCTTCTAACGACCAAGGT	58.947	20	236	17	252	TATGCGGTCCCAAAGTGGAT	59.084	20	TGAATCAGTCCGAGGTAGCC	58.888	20	135	67	201
scaf_0000160_21	p3	(TAT)5	15	151	165	TCTGCTTTGTTGTTGGGCAA	58.81	20	GAGGCTTGCAAGTTCATCCT	58.168	20	112	4	115	TCTGCTTTGTTGTTGGGCAA	58.81	20	AGAGGCTTGCAAGTTCATCC	58.168	20	113	4	116	CTCTGCTTTGTTGTTGGGCA	59.254	20	GAGGCTTGCAAGTTCATCCT	58.168	20	113	3	115
scaf_0000160_22	p3	(TAT)5	15	2	16	TGCACCTTTTTAAGCCACTGT	58.616	21	TTTTCTCTTGCTCAACTGAGGA	57.578	22	112	90	201	AGCCACTATTTCTGCACCTT	57.113	20	TTTTCTCTTGCTCAACTGAGGA	57.578	22	124	78	201	AAGCCACTATTTCTGCACCT	57.113	20	TTTTCTCTTGCTCAACTGAGGA	57.578	22	125	77	201
scaf_0000162_16	p3	(ACC)5	15	151	165	TGTCGACCTCTCTCTCTCCA	59.015	20	TGTGGTTGTTGTTGGTGGTG	59.109	20	147	31	177	TGAACCCAACTCCAACCCTT	59.069	20	TGTGGTTGTTGTTGGTGGTG	59.109	20	114	64	177	CCATGGCTTCTGAACCCAAC	59.109	20	TGTGGTTGTTGTTGGTGGTG	59.109	20	124	54	177
scaf_0000162_18	p4	(TCTT)5	20	151	170	AACTATCATTCCAAGCCCACA	57.262	21	GGAGTCTAGGACTGCCCAAC	59.462	20	270	31	300	AACTATCATTCCAAGCCCACA	57.262	21	GAGTCTAGGACTGCCCAACT	58.437	20	269	31	299	CATTCCAAGCCCACATAGTACA	58.115	22	GGAGTCTAGGACTGCCCAAC	59.462	20	264	37	300
scaf_0000164_14	p3	(ACC)5	15	151	165	TGGCGGTGGTGACGATATAA	58.887	20	ATGGTGTAGTTGGTGGTGGT	58.854	20	107	69	175	TTGGCGGTGGTGACGATATA	58.887	20	ATGGTGTAGTTGGTGGTGGT	58.854	20	108	68	175	AGAAAAACTTGGCGGTGGTG	59.256	20	ATGGTGTAGTTGGTGGTGGT	58.854	20	116	60	175
scaf_0000164_17	p4	(AAAG)5	20	151	170	AGAGGAAAATCGGGATCGCT	58.876	20	AACCATGTGAACACAGTCCA	57.273	20	229	29	257	AGAGGAAAATCGGGATCGCT	58.876	20	ACCATGTGAACACAGTCCAT	57.043	20	228	29	256	AGAGGAAAATCGGGATCGCT	58.876	20	AAACCATGTGAACACAGTCCA	57.988	21	230	29	258
scaf_0000165_4	p3	(GCA)6	18	151	168	GCACCAACACTAGCAGTACC	58.56	20	AAGGATTGTTCCAGCCTCGA	59.016	20	109	165	273	AAGAAAGACAAGCCCCGAGA	58.943	20	TCGCTAGTCTCGGCATCATC	59.406	20	113	201	313	GGAAAGAAAGACAAGCCCCG	59.118	20	TCGCTAGTCTCGGCATCATC	59.406	20	116	198	313
scaf_0000166_11	p4	(TTAT)5	20	151	170	TGCTTGTCCTGAAGTTGGAA	57.273	20	TGAATCCCCAACCACCAGAA	58.846	20	208	49	256	TGCTTGTCCTGAAGTTGGAA	57.273	20	TCCCCAACCACCAGAAGAAA	58.773	20	204	49	252	TGCTTGTCCTGAAGTTGGAA	57.273	20	TGTGTGAATCCACCCGTAGT	58.656	20	249	49	297
scaf_0000170_27	p3	(GGA)10	30	151	180	CAGAGGTGTCAGAAGCAGGA	59.028	20	CCCATGACCTTGTTCCCTCT	59.005	20	201	64	264	TCAGAGGTGTCAGAAGCAGG	59.028	20	CCCATGACCTTGTTCCCTCT	59.005	20	202	63	264	CAGAGGTGTCAGAAGCAGGA	59.028	20	TCCCATGACCTTGTTCCCTC	59.008	20	202	64	265
scaf_0000172_9	p3	(AAT)13	39	151	189	TAACACATGGAGGGGTTGCA	59.226	20	ATGCAAGTGGGAGAAAGGGA	58.924	20	106	10	115	TAACACATGGAGGGGTTGCA	59.226	20	TGCAAGTGGGAGAAAGGGAA	59.15	20	105	10	114	CTAACACATGGAGGGGTTGC	58.536	20	ATGCAAGTGGGAGAAAGGGA	58.924	20	107	9	115
scaf_0000172_10	p3	(TTA)11	33	151	183	GCAGCGTAAGTGATCATGCA	58.991	20	TGTGAGTGGTGATGAATGCA	57.435	20	272	22	293	GCAGCGTAAGTGATCATGCA	58.991	20	TTGCATCATGTGAGTGGTGA	57.435	20	280	22	301	TGCAGCGTAAGTGATCATGC	58.991	20	TGTGAGTGGTGATGAATGCA	57.435	20	273	21	293
scaf_0000174_12	p3	(TTA)6	18	151	168	GTCCGTCCTTCCTTCCTTGA	59.026	20	AGTTGGGTCACGTCACGTTA	59.254	20	130	11	140	CATTTGGTGGTCCGTCCTTC	58.835	20	AGTTGGGTCACGTCACGTTA	59.254	20	139	2	140	TACATTTGGTGGTCCGTCCT	58.646	20	AGTTGGGTCACGTCACGTTA	59.254	20	141	0	140
scaf_0000174_13	p3	(TCT)7	21	151	171	TCCCACTACAACACCCCTTC	58.938	20	ATGCTGCCAACTCCTCATCT	59.082	20	235	74	308	CCCACTACAACACCCCTTCT	58.935	20	ATGCTGCCAACTCCTCATCT	59.082	20	234	75	308	CTCCCACTACAACACCCCTT	58.935	20	ATGCTGCCAACTCCTCATCT	59.082	20	236	73	308
scaf_0000175_12	p3	(TCA)7	21	151	171	ACCATCACCACCATCATCCA	58.702	20	CGGTGAGGGATTTGAGTGGA	59.387	20	182	9	190	ACCATCACCACCATCATCCA	58.702	20	TCGGTGAGGGATTTGAGTGG	59.387	20	183	9	191	CACCATCACCACCATCATCC	58.316	20	CGGTGAGGGATTTGAGTGGA	59.387	20	183	8	190
scaf_0000179_6	p3	(GAA)5	15	151	165	TCCAACCAAAGAAAGCATGGA	58.044	21	GTGGTAGCTGTGTGCCATTC	59.195	20	261	12	272	TCCAACCAAAGAAAGCATGGA	58.044	21	GGTAGCTGTGTGCCATTCAA	58.466	20	259	12	270	TCCAACCAAAGAAAGCATGGA	58.044	21	TGGTAGCTGTGTGCCATTCA	59.6	20	260	12	271
scaf_0000180_12	p3	(TTG)5	15	151	165	TCCTTGGTCATTGATGGAGGA	58.439	21	ACCCAGAAGGAAAAGGGACC	59.222	20	141	124	264	TCCTTGGTCATTGATGGAGGA	58.439	21	AATGCGACATGCTTTACCGG	59.267	20	165	124	288	GTCCTTGGTCATTGATGGAGG	58.352	21	ACCCAGAAGGAAAAGGGACC	59.222	20	142	123	264
scaf_0000181_6	p3	(ACT)5	15	151	165	TTTGACAAGGCATCGCGAAA	59.052	20	AGGTTATGGTTGGACTCGCA	59.019	20	264	8	271	TTTGACAAGGCATCGCGAAA	59.052	20	TTGGACTCGCACTCTCATGT	59.031	20	255	8	262	TACTTTGACAAGGCATCGCG	58.924	20	AGGTTATGGTTGGACTCGCA	59.019	20	267	5	271
scaf_0000183_19	p3	(CTC)7	21	151	171	TGCACAAGACTTGACATGGC	59.046	20	ACGATGACGATGAAAGCAGC	58.998	20	185	52	236	TGCACAAGACTTGACATGGC	59.046	20	CGATGAAAGCAGCCGATGAA	58.991	20	178	52	229	TGCACAAGACTTGACATGGC	59.046	20	GCCGATGAAGCACCCATTAG	59.053	20	167	52	218
scaf_0000184_22	p3	(GAT)6	18	151	168	TCCGAACAGAACAGAGGACA	58.3	20	TCAAGGAGTTGTTGTTCCGC	58.695	20	103	87	189	TCCGAACAGAACAGAGGACA	58.3	20	AAGGAGTTGTTGTTCCGCTG	58.691	20	101	87	187	TCCGAACAGAACAGAGGACA	58.3	20	CAAGGAGTTGTTGTTCCGCT	58.691	20	102	87	188
scaf_0000185_10	p3	(AAT)12	36	151	186	GGTTTAAGCCCGGTTACACA	58.105	20	AGGACATGGTGATTCTGCCT	58.707	20	212	75	286	AGCCCGGTTACACAAATGATG	58.908	21	AGGACATGGTGATTCTGCCT	58.707	20	206	81	286	AGGTTTAAGCCCGGTTACAC	57.81	20	AGGACATGGTGATTCTGCCT	58.707	20	213	74	286
scaf_0000185_14	p4	(AAAT)8	32	151	182	AGACGGATGAGAAATCACCACT	59.165	22	ACATCATTGGTTTTGGAGCGT	58.761	21	255	69	323	TGAGACGGATGAGAAATCACCA	59.168	22	ACATCATTGGTTTTGGAGCGT	58.761	21	257	67	323	GAGACGGATGAGAAATCACCAC	58.809	22	ACATCATTGGTTTTGGAGCGT	58.761	21	256	68	323
scaf_0000185_17	p3	(GGT)6	18	151	168	ACGTGACTTCCAACTAGGGG	59.026	20	AAGGCCAATGTCTACCCACA	58.928	20	169	43	211	ACGTGACTTCCAACTAGGGG	59.026	20	ACAAGGCCAATGTCTACCCA	58.928	20	171	43	213	ACGTGACTTCCAACTAGGGG	59.026	20	TGTCTACCCACAGAAGCGAG	59.111	20	161	43	203
scaf_0000186_12	p3	(CTT)6	18	151	168	TTCATCCTCAAGCCTCGTCA	58.734	20	ACCCCCAACTCGCATAAAGA	59.011	20	179	80	258	CAAGCCTCCGGTTTCGAATC	59.273	20	ACCCCCAACTCGCATAAAGA	59.011	20	252	7	258	TTCATCCTCAAGCCTCGTCA	58.734	20	GAGAGAGATCGACCGCAAGA	58.982	20	136	80	215
scaf_0000186_36	p4	(CAAA)5	20	151	170	TGGTCTTGGTTGTCTTCTCCA	58.876	21	ACTTTCCACGTTCCCTAAACT	57.149	21	209	104	312	TGGTCTTGGTTGTCTTCTCCA	58.876	21	CGTTCCCTAAACTATTGTGCAGT	58.999	23	201	104	304	TGGTCTTGGTTGTCTTCTCCA	58.876	21	ACGTTCCCTAAACTATTGTGCAG	58.999	23	202	104	305
scaf_0000187_8	p3	(AGA)5	15	151	165	CCAACTCGGTTATCAAGGGC	58.62	20	TCACATCAAGATTGTGGCGA	57.529	20	221	4	224	CCAACTCGGTTATCAAGGGC	58.62	20	TCACATCAAGATTGTGGCGAA	58.223	21	221	4	224	CCAACTCGGTTATCAAGGGC	58.62	20	GCATCACATCAAGATTGTGGC	58.194	21	224	4	227
scaf_0000187_24	p3	(AAT)9	27	151	177	TTAAAGCCACGTTGCCACAA	58.896	20	TGTGACCTGTCGATCATGATCA	59.24	22	242	53	294	TTTAAAGCCACGTTGCCACA	58.896	20	TGTGACCTGTCGATCATGATCA	59.24	22	243	52	294	GCCACGTTGCCACAATCATA	59.192	20	TGTGACCTGTCGATCATGATCA	59.24	22	237	58	294
scaf_0000188_3	p3	(ATC)5	15	151	165	ACTACCTTGCCACCAGTCTC	59.023	20	ATCAAGCACTCGGAGGGAAA	59.016	20	167	31	197	CTACCTTGCCACCAGTCTCA	59.023	20	ATCAAGCACTCGGAGGGAAA	59.016	20	166	32	197	GCCACCAGTCTCATCTCTGT	59.099	20	ATCAAGCACTCGGAGGGAAA	59.016	20	159	39	197
scaf_0000188_5	p3	(AAT)7	21	151	171	CAAGGATGCACAAGGGTTGC	60.038	20	TTGCAGAAAACAGAGGGCAG	58.679	20	100	213	312	CAAGGATGCACAAGGGTTGC	60.038	20	TTTGCAGAAAACAGAGGGCA	58.226	20	101	213	313	AAGGATGCACAAGGGTTGC	58.645	19	TTTGCAGAAAACAGAGGGCA	58.226	20	100	214	313
scaf_0000190_8	p3	(TTA)6	18	151	168	TTAATTCCCCACCCACTTTTGA	57.8	22	AGCACTATTTCAGCCAACCG	58.547	20	100	42	141	AATTCCCCACCCACTTTTGA	57.215	20	ATAGCACTATTTCAGCCAACCG	58.794	22	100	44	143	AATTCCCCACCCACTTTTGAA	57.947	21	ATAGCACTATTTCAGCCAACCG	58.794	22	100	44	143
scaf_0000192_8	p3	(AAG)5	15	151	165	ACCCACAAGAACTAGACCCG	59.026	20	CGGCTTGTTCTTCGTCTTGT	58.782	20	168	69	236	ACAAGAACTAGACCCGGCAA	58.947	20	CGGCTTGTTCTTCGTCTTGT	58.782	20	164	73	236	ACCCACAAGAACTAGACCCG	59.026	20	TCGGCTTGTTCTTCGTCTTG	58.502	20	169	69	237
scaf_0000192_12	p3	(AAT)14	42	151	192	ACACAATGCCCATATGCAAATG	58.201	22	GTGGGAAGAAAGGACATCACA	57.86	21	200	113	312	ACACAATGCCCATATGCAAATG	58.201	22	TGTGGGAAGAAAGGACATCAC	57.86	21	201	113	313	GCCCATATGCAAATGACATAGC	58.158	22	GTGGGAAGAAAGGACATCACA	57.86	21	193	120	312
scaf_0000194_9	p3	(TTG)5	15	151	165	TGGCATTTGGTTGAGATTGGT	58.393	21	GACATCACAACCTCCCCTCT	58.72	20	154	89	242	TGGCATTTGGTTGAGATTGGT	58.393	21	ACCAGGACATCACAACCTCC	59.307	20	159	89	247	TGGCATTTGGTTGAGATTGGTT	59.029	22	GACATCACAACCTCCCCTCT	58.72	20	154	89	242
scaf_0000195_1	p4	(CTAT)5	20	151	170	ACTTGACACCCACCACTTCT	58.787	20	GCTTGGACAGCTGACAATGA	58.473	20	102	28	129	AACTTGACACCCACCACTTC	57.947	20	GCTTGGACAGCTGACAATGA	58.473	20	103	27	129	ACTTGACACCCACCACTTCT	58.787	20	CTTGGACAGCTGACAATGACA	58.503	21	101	28	128
scaf_0000197_17	p3	(AAT)5	15	151	165	TCCACCATGCAAGACCACTA	58.643	20	TCAAGTACTCCACCAACCCT	57.888	20	178	77	254	GTTCCACCATGCAAGACCAC	59.402	20	TCAAGTACTCCACCAACCCT	57.888	20	180	75	254	TTCCACCATGCAAGACCACT	59.522	20	TCAAGTACTCCACCAACCCT	57.888	20	179	76	254
scaf_0000198_20	p3	(TAG)5	15	151	165	AGGTGTAATTGTTGCGGATGG	58.908	21	TGTACGTCGGCATCACTGTA	58.833	20	102	193	294	GGTGTAATTGTTGCGGATGGT	59.184	21	TGTACGTCGGCATCACTGTA	58.833	20	101	194	294	AGGTGTAATTGTTGCGGATGG	58.908	21	CCAATGTACGTCGGCATCAC	59.349	20	106	193	298
scaf_0000198_21	p3	(CCA)6	18	151	168	AGCTCCGTAACCAACTCCAA	58.947	20	TGGCATGTGGGAGAGGAATT	58.998	20	253	62	314	TCACCCACCCTTTACCCTTC	58.93	20	TGGCATGTGGGAGAGGAATT	58.998	20	225	90	314	CTCACCCACCCTTTACCCTT	58.927	20	TGGCATGTGGGAGAGGAATT	58.998	20	226	89	314
scaf_0000198_22	p4	(TTTA)5	20	151	170	AAATTTGCCTTGCAGGTGGT	58.869	20	ACACCAGCCCTTTTTCTTGC	59.247	20	100	220	319	TACCACGGACACTCCATCAC	59.107	20	TTCTTGCTCCCTCTACCACC	58.723	20	251	3	253	CAAATTTGCCTTGCAGGTGG	58.485	20	CACCAGCCCTTTTTCTTGCT	58.957	20	100	219	318
scaf_0000198_23	p3	(AAT)5	15	151	165	AGCAAGAAAAAGGGCTGGTG	58.957	20	CCCCATACCACCTGTCAACT	59.008	20	191	28	218	AGTTGACAGGTGGTATGGGG	59.008	20	AGCAGCAATAGGGCTTACCA	59.081	20	107	199	305	AGCAAGAAAAAGGGCTGGTG	58.957	20	AGCAGCAATAGGGCTTACCA	59.081	20	278	28	305
scaf_0000199_25	p3	(GAA)5	15	151	165	CGTGCCTCATTTAGTTGCCA	58.836	20	TGAATTTCTGGTAGCTGTGGC	58.564	21	123	73	195	ACCGTGCCTCATTTAGTTGC	58.835	20	TGAATTTCTGGTAGCTGTGGC	58.564	21	125	71	195	CGTGCCTCATTTAGTTGCCA	58.836	20	GCTTTGCAGCCATTCTTCTTC	58.396	21	104	73	176
scaf_0000201_4	p3	(TCT)5	15	294	308	ACCACCACTGCTCATTTTCC	58.379	20	AGGAAGAGGAAGAGAAAGTGGG	59.09	22	265	29	293	ACCACCACTGCTCATTTTCC	58.379	20	GGAAGAGGAAGAGAAAGTGGG	57.658	21	264	29	292	ACCACCACTGCTCATTTTCC	58.379	20	GGAAGAGGAAGAGAAAGTGGGT	59.36	22	264	29	292
scaf_0000201_14	p3	(CAA)5	15	151	165	CCGCAAGCCACAAACTCTAT	58.547	20	ACACACAGTAAAGTCGCATGA	57.894	21	213	100	312	CTACCGCAAGCCACAAACTC	59.483	20	ACACACAGTAAAGTCGCATGA	57.894	21	216	97	312	TACTACCGCAAGCCACAAAC	58.485	20	ACACACAGTAAAGTCGCATGA	57.894	21	218	95	312
scaf_0000203_11	p3	(TTA)5	15	151	165	TCCTCTTCCCAAGACAGACT	57.296	20	GGGTTGAAAGGCGTTGAGAG	59.125	20	142	102	243	TCCTCTTCCCAAGACAGACT	57.296	20	AAGGGTTGAAAGGCGTTGAG	58.681	20	144	102	245	TCCCAAGACAGACTTCTTCCT	58.022	21	GGGTTGAAAGGCGTTGAGAG	59.125	20	136	108	243
scaf_0000203_14	p3	(AAG)6	18	151	168	CGGGTCTCTGCTAACTGACA	59.111	20	ACTCCACCACATGCATCTCT	58.717	20	144	130	273	CCATCGGGTCTCTGCTAACT	58.885	20	ACTCCACCACATGCATCTCT	58.717	20	148	126	273	GAAGCGAACCTTTGGTGGAG	59.125	20	ACTCCACCACATGCATCTCT	58.717	20	196	78	273
scaf_0000203_15	p3	(AGG)7	21	151	171	GAGGAGGAGGAGGAGGAGAA	59.069	20	TTGGGTGTGGAAACAGGGAT	59.143	20	100	155	254	AGAGATGCATGTGGTGGAGT	58.717	20	TTGGGTGTGGAAACAGGGAT	59.143	20	155	100	254	AGGAGGAGGAGGAGGAGAAG	59.066	20	TTTGGGTGTGGAAACAGGGA	59.368	20	100	156	255
scaf_0000203_19	p4	(AGAT)5	20	151	170	CAGATAGGCGGCACTAGACA	58.967	20	TCCATCCCTACCCACACCTA	58.98	20	144	45	188	TGACAGATAGGCGGCACTAG	58.967	20	TCCATCCCTACCCACACCTA	58.98	20	147	42	188	ACAGATAGGCGGCACTAGAC	58.966	20	TCCATCCCTACCCACACCTA	58.98	20	145	44	188
scaf_0000204_10	p3	(TTA)13	39	151	189	TCCAAGACCAACTCACGTGA	58.884	20	GTCACCATGTGTGTGGGTTT	58.601	20	268	63	330	CCAAGACCAACTCACGTGAC	58.782	20	GTCACCATGTGTGTGGGTTT	58.601	20	267	64	330	TCCAAGACCAACTCACGTGA	58.884	20	ATGTCACCATGTGTGTGGGT	59.522	20	270	63	332
scaf_0000205_11	p3	(ATC)5	15	151	165	ACGGGCCATCTGTGAAAGTA	59.019	20	CGGCCTTATCTCAAGGTGGA	59.169	20	200	84	283	AGTATACCACGGGCCATCTG	58.951	20	CGGCCTTATCTCAAGGTGGA	59.169	20	208	76	283	ACCCATCCACCTGCACTAAA	58.928	20	CGGCCTTATCTCAAGGTGGA	59.169	20	264	20	283
scaf_0000206_20	p3	(TTC)10	30	151	180	ACCTGTGTCTCTAGAATGGGA	57.525	21	ATTTCCCATCTCCTCGCCAA	59.081	20	157	119	275	ACCTGTGTCTCTAGAATGGGAA	58.209	22	ATTTCCCATCTCCTCGCCAA	59.081	20	157	119	275	AACCTGTGTCTCTAGAATGGGA	58.209	22	ATTTCCCATCTCCTCGCCAA	59.081	20	158	118	275
scaf_0000209_3	p3	(TCT)9	27	151	177	GCCAATGGCTCATCTATGCT	58.093	20	AGCATAGAAAACGTCGGGGA	59.1	20	110	102	211	GCCAATGGCTCATCTATGCT	58.093	20	ACGTCGGGGATAGACAAACA	58.74	20	100	102	201	GCCAATGGCTCATCTATGCT	58.093	20	GAGCATAGAAAACGTCGGGG	58.713	20	111	102	212
scaf_0000210_5	p3	(ACC)6	18	151	168	ACCACAAACCTGAATCCGGA	59.231	20	GGTGGTGGTGGTAGTGATGA	59.019	20	116	46	161	ACCACAAACCTGAATCCGGA	59.231	20	TCAGTTGCATGATGGCGATG	58.981	20	165	46	210	TCATCACTACCACCACCACC	59.019	20	GACAACTGTAGTGGGGGTGT	59.237	20	175	142	316
scaf_0000211_13	p3	(TTG)6	18	151	168	GGAAGTGAGGATGAAACCAATGA	58.665	23	CCACCAAACAACAACAACAACA	58.606	22	117	59	175	GGAAGTGAGGATGAAACCAATGA	58.665	23	ACCACCAAACAACAACAACAAC	58.605	22	118	59	176	AGGAAGTGAGGATGAAACCAATG	58.661	23	CCACCAAACAACAACAACAACA	58.606	22	118	58	175
scaf_0000212_3	p3	(AGC)5	15	151	165	GGGACGAATCACCAATCTGC	58.983	20	TTCTTGCAGACTCGGGTGAT	59.023	20	228	3	230	GGGACGAATCACCAATCTGC	58.983	20	GGCTTCACCACTTTCTTGCA	58.968	20	240	3	242	AGAAACTCCTCCGGCGATAG	58.966	20	GGCTTCACCACTTTCTTGCA	58.968	20	111	132	242
scaf_0000215_6	p3	(GGA)5	15	151	165	TTTACGGAGGAGGAGGAGGA	58.995	20	TCGAAACTCCACAGAGCGAT	59.111	20	112	145	256	TGAAGAGAAACCGGTGCTCT	58.951	20	TCGAAACTCCACAGAGCGAT	59.111	20	142	115	256	TCCATCGCTACCATCACGTT	59.178	20	TCCTCCTCCTCCTCCGTAAA	58.995	20	165	0	164
scaf_0000216_5	p3	(CAT)5	15	151	165	CCACCGATAGCCCAAAACAG	58.905	20	TGGCTTTACGAAATTGGAACGA	58.86	22	142	44	185	CCACCGATAGCCCAAAACAG	58.905	20	TGATGATGATGGTGGAGTTGGA	59.154	22	117	44	160	CTATCCTCCACCGATAGCCC	58.813	20	TGGCTTTACGAAATTGGAACGA	58.86	22	149	37	185
scaf_0000216_11	p3	(CAT)5	15	151	165	TCCTCCATTGATAGCCCAAAAT	57.459	22	TGATGGTGGTGGAGTTGGAT	58.629	20	118	37	154	TCCTCCATTGATAGCCCAAAAT	57.459	22	ATGATGGTGGTGGAGTTGGA	58.629	20	119	37	155	ATCCTCCATTGATAGCCCAAAA	57.459	22	TGATGGTGGTGGAGTTGGAT	58.629	20	119	36	154
scaf_0000216_16	p4	(AAAT)6	24	151	174	TGGGATTGGAGAAGATGAGGG	58.87	21	TCTCAACTCAAACCCTAACCCT	58.676	22	146	114	259	GGGATTGGAGAAGATGAGGGT	58.869	21	TCTCAACTCAAACCCTAACCCT	58.676	22	145	115	259	TGGGATTGGAGAAGATGAGGG	58.87	21	ACCCTAACCCTAACACTAGCT	57.513	21	135	114	248
scaf_0000216_19	p4	(TTAT)5	20	151	170	AAGACCATCCAGCCCACTAC	59.088	20	ATCTAACCGATGTGGGCCAA	59.084	20	111	188	298	AAGACCATCCAGCCCACTAC	59.088	20	AATCTAACCGATGTGGGCCA	59.084	20	112	188	299	AAGACCATCCAGCCCACTAC	59.088	20	GATGTGGGCCAAGTCTTGTC	58.831	20	103	188	290
scaf_0000217_1	p3	(GCC)6	18	363	380	CACACGCACACACTCTCTTT	58.71	20	TAGTGACGAACGGTGCTGAT	59.114	20	229	119	347	CACACGCACACACTCTCTTT	58.71	20	GGTAGAGATGGTGGAGGTGG	58.876	20	194	119	312	CACACGCACACACTCTCTTT	58.71	20	GACGAACGGTGCTGATTGTT	59.134	20	225	119	343
scaf_0000217_2	p3	(GCC)6	18	151	168	CCACCTCCACCATCTCTACC	58.876	20	GGCGCTGGTGATTAAGACAG	58.99	20	120	81	200	CCACCTCCACCATCTCTACC	58.876	20	CGAATGGCGCTGGTGATTAA	58.986	20	125	81	205	ATCAGCACCGTTCGTCACTA	59.114	20	AGAGGACGATGGTGGTTGTT	58.943	20	126	116	241
scaf_0000218_7	p3	(TAA)9	27	151	177	TTGGGAGACTTATTGGCCGG	59.745	20	CGCATGTGGTATGATATTGAAGG	57.713	23	101	223	323	TGGGAGACTTATTGGCCGG	59.088	19	CGCATGTGGTATGATATTGAAGG	57.713	23	100	224	323	TTGGGAGACTTATTGGCCGG	59.745	20	GCATGTGGTATGATATTGAAGGG	57.366	23	100	223	322
scaf_0000218_18	p3	(AAT)5	15	151	165	CAAATGAGTGCGAGGCATGA	58.911	20	GAGCAAGCCTTGTCAGATCG	58.995	20	210	64	273	ACAAATGAGTGCGAGGCATG	59.193	20	GAGCAAGCCTTGTCAGATCG	58.995	20	211	63	273	CACAAATGAGTGCGAGGCAT	59.193	20	GAGCAAGCCTTGTCAGATCG	58.995	20	212	62	273
scaf_0000221_1	p3	(CTT)8	24	151	174	CCATGCTGTTGTTGCTGCTA	59.117	20	AGAGAGTAAAAGCGAGGGCA	58.733	20	102	127	228	TGCTGTTGTTGCTGCTACTG	59.053	20	ACTAAGTGTGGCGGTTAAGC	58.195	20	194	130	323	CCTTCAATGCCCTCGCTTTT	59.109	20	ACTAAGTGTGGCGGTTAAGC	58.195	20	122	202	323
scaf_0000221_3	p3	(ATG)5	15	151	165	TGTTGGGTTTTACGGAATTGGA	58.437	22	AGCCATCCTCCACTGATAGC	58.945	20	149	128	276	TGTTGGGTTTTACGGAATTGGA	58.437	22	CCATCCTCCACTGATAGCCC	59.31	20	147	128	274	TGTTGGGTTTTACGGAATTGGA	58.437	22	CATCCTCCACTGATAGCCCA	58.572	20	146	128	273
scaf_0000221_14	p4	(TTAT)5	20	151	170	GGCACCCCATTACTTTGAACA	58.756	21	AGGACAAGTTGACTCTGCCA	58.868	20	206	111	316	GCGTATTGCCATGGAAAGCT	59.259	20	TGTTCAAAGTAATGGGGTGCC	58.756	21	109	23	131	AGGCACCCCATTACTTTGAAC	58.475	21	AGGACAAGTTGACTCTGCCA	58.868	20	207	110	316
scaf_0000225_15	p3	(GAA)9	27	151	177	AAAGAGACGACAGCTCCCAA	58.951	20	ACCCAAATCAGTCGACGACT	59.033	20	239	70	308	AAAAGAGACGACAGCTCCCA	58.951	20	ACCCAAATCAGTCGACGACT	59.033	20	240	69	308	AAAGAGACGACAGCTCCCAA	58.951	20	CTTCCTCTAGGCTCGTCTCG	59.058	20	172	70	241
scaf_0000226_11	p4	(TATT)5	20	151	170	GGTGTGGAACGGAAAAGGAC	59.051	20	AAACGTCGGCATAACTCTGC	58.924	20	271	25	295	GGTGTGGAACGGAAAAGGAC	59.051	20	CGTCGGCATAACTCTGCATC	59.145	20	268	25	292	AGAAGGGTGTGGAACGGAAA	59.159	20	AAACGTCGGCATAACTCTGC	58.924	20	276	20	295
scaf_0000226_14	p3	(TTC)10	30	151	180	CGAGTCTGTGAATCGGGAGA	58.904	20	ATCTCCCCACCCCCAAAAAT	58.899	20	115	96	210	AGGCTGAAGCTGAGATGGAG	59.168	20	TCTCCCGATTCACAGACTCG	58.904	20	105	11	115	GGGTACTGCAAAGGCTGAAG	58.831	20	TCTCCCGATTCACAGACTCG	58.904	20	116	0	115
scaf_0000226_17	p3	(GAG)8	24	151	174	TTCGACTTCCAGTAGCAGCA	59.034	20	CTCTTCCTCCTCCTCCTCCT	59.066	20	169	11	179	TTCGACTTCCAGTAGCAGCA	59.034	20	TCTTCCTCCTCCTCCTCCTC	59.069	20	168	11	178	TTCGACTTCCAGTAGCAGCA	59.034	20	CGCTGCAGCTACAGATTCAG	59.071	20	205	11	215
scaf_0000226_34	p4	(AAAT)5	20	151	170	GATGGAATCGTGGTGCATGT	58.617	20	ACCCAAGATTAAAGGCAGAGAA	57.342	22	183	84	266	TGGAATCGTGGTGCATGTAA	57.519	20	ACCCAAGATTAAAGGCAGAGAA	57.342	22	181	86	266	GATGGAATCGTGGTGCATGTA	58.439	21	ACCCAAGATTAAAGGCAGAGAA	57.342	22	183	84	266
scaf_0000226_35	p4	(AAAT)5	20	151	170	TAGGAAGCGTCGCAGGAAA	59.031	19	TCACGACATCTGTGAACCCA	58.955	20	122	0	121	TAGGAAGCGTCGCAGGAAAG	60.109	20	TCACGACATCTGTGAACCCA	58.955	20	122	0	121	TAGGAAGCGTCGCAGGAAA	59.031	19	TGTGAACCCAAGTCTGAGGT	58.493	20	112	0	111
scaf_0000226_37	p3	(TTG)6	18	151	168	GAAAGCCACTCATTCACCCA	58.09	20	GTCATTTTAACGGCGTCCCT	58.554	20	269	14	282	GAAAGCCACTCATTCACCCA	58.09	20	AGTCATTTTAACGGCGTCCC	58.554	20	270	14	283	TGAAAGCCACTCATTCACCC	58.09	20	GTCATTTTAACGGCGTCCCT	58.554	20	270	13	282
scaf_0000230_24	p4	(AATT)5	20	151	170	GGTTTCTCGCTGAGCATCTG	58.995	20	GGACAGACTGCTGCCAAAAT	58.749	20	176	88	263	TGAGCATCTGCACTCTGACA	59.029	20	GGACAGACTGCTGCCAAAAT	58.749	20	166	98	263	TTGTTTGGCTTGCGGTTTCT	59.179	20	GGACAGACTGCTGCCAAAAT	58.749	20	189	75	263
scaf_0000231_5	p3	(AAT)5	15	151	165	GCACATAAATGGCATGCGTT	58.075	20	TGGTCCAATTGATAACGCTCA	57.658	21	129	171	299	ATGCGCACATAAATGGCATG	57.857	20	TGGTCCAATTGATAACGCTCA	57.658	21	133	167	299	GCGCACATAAATGGCATGC	58.781	19	TGGTCCAATTGATAACGCTCA	57.658	21	131	169	299
scaf_0000231_7	p3	(ACC)5	15	151	165	CCTAACTCCGCCACTAACCA	59.1	20	TATGGTAGTGATGGTGGCGG	59.244	20	101	134	234	TCCTAACTCCGCCACTAACC	58.811	20	TATGGTAGTGATGGTGGCGG	59.244	20	102	133	234	CCTAACTCCGCCACTAACCA	59.1	20	GCTGGCCCCAAAAGTCAATA	58.444	20	123	134	256
scaf_0000232_7	p4	(ATTT)6	24	151	174	CAGCCTCAATGTAGCAACTGA	58.297	21	GCTCACAGTTTTCTCTGATTTGC	58.775	23	227	81	307	TCAGCCTCAATGTAGCAACTG	58.297	21	GCTCACAGTTTTCTCTGATTTGC	58.775	23	228	80	307	GCCTCAATGTAGCAACTGAGA	58.022	21	GCTCACAGTTTTCTCTGATTTGC	58.775	23	225	83	307
scaf_0000232_24	p4	(AACA)5	20	151	170	GCTCAAGCGAAGAATGCACT	59.199	20	TGTTCCCAAACGAGGCCTTA	59.234	20	167	42	208	GCTCAAGCGAAGAATGCACT	59.199	20	AAAGCCTGTTCCCAAACGAG	58.681	20	173	42	214	GCGAAGAATGCACTACTCCC	58.709	20	TGTTCCCAAACGAGGCCTTA	59.234	20	161	48	208
scaf_0000233_10	p3	(GGC)6	18	151	168	GAGGACCGGGCTCATATTCA	58.951	20	TCCGCTTTTCCTCCATCCAT	59.081	20	119	87	205	GAGGACCGGGCTCATATTCA	58.951	20	ATCCGCTTTTCCTCCATCCA	59.081	20	120	87	206	TGAGGACCGGGCTCATATTC	58.951	20	TCCGCTTTTCCTCCATCCAT	59.081	20	120	86	205
scaf_0000235_12	p3	(TGA)8	24	151	174	TCCAACACATCAAGGGAAAACC	59.038	22	TCACAGAATCCATGTTGTTCGG	58.926	22	192	117	308	ACAAACTCCAACACATCAAGGG	59.042	22	TCACAGAATCCATGTTGTTCGG	58.926	22	198	111	308	TCCAACACATCAAGGGAAAACC	59.038	22	ACAGAATCCATGTTGTTCGGT	57.86	21	190	117	306
scaf_0000236_5	p4	(AAAC)5	20	151	170	CCACGCTTGCCTCCTAGTAT	59.247	20	CCTTCAACTGTTGGCGCAT	59.041	19	203	19	221	CCACGCTTGCCTCCTAGTAT	59.247	20	TTCAACTGTTGGCGCATCC	59.044	19	201	19	219	CCACGCTTGCCTCCTAGTAT	59.247	20	CTTCAACTGTTGGCGCATCC	60.11	20	202	19	220
scaf_0000236_22	p3	(AAT)6	18	151	168	GGAGGTGCATACGCTAGACA	59.255	20	TCCTCATTGTGTCCTCTGCA	58.649	20	102	31	132	GGACACTTTGGACACGCTAC	58.854	20	TAAAGGGCAAGACACGTTGG	58.4	20	249	66	314	TTGGACACGCTACGGATACA	58.824	20	TAAAGGGCAAGACACGTTGG	58.4	20	242	73	314
scaf_0000238_5	p3	(AAT)5	15	151	165	TGGTCATAGAAATGTGCTGCT	57.645	21	TGGAACAAGAACTGGAACGG	58.038	20	190	76	265	TTGGTCATAGAAATGTGCTGCT	58.311	22	TGGAACAAGAACTGGAACGG	58.038	20	191	75	265	TGGTCATAGAAATGTGCTGCT	57.645	21	TGGAACAAGAACTGGAACGGT	59.789	21	190	76	265
scaf_0000238_8	p4	(TAAA)5	20	151	170	CAAGCCAAATTCGCAAGTGG	58.579	20	ACACTCACCATCACTTCCACA	59.232	21	214	63	276	CAAGCCAAATTCGCAAGTGG	58.579	20	CACTCACCATCACTTCCACA	57.451	20	213	63	275	CAAGCCAAATTCGCAAGTGG	58.579	20	ACACTCACCATCACTTCCAC	57.449	20	214	63	276
scaf_0000238_20	p3	(GAA)14	42	151	192	GGGGCATGTGGAAGAAGAAG	58.532	20	AGCTGTGATGACCGGGTAAT	58.796	20	118	140	257	TGAAAAGCTAAGTGGGGGCA	59.519	20	AGCTGTGATGACCGGGTAAT	58.796	20	132	126	257	AAAAGCTAAGTGGGGGCATG	58.439	20	AGCTGTGATGACCGGGTAAT	58.796	20	130	128	257
scaf_0000238_21	p3	(AAG)11	33	1	33	ATTACCCGGTCATCACAGCT	58.796	20	CCGCACCCGATACTTGTACT	59.541	20	226	81	306	ATTACCCGGTCATCACAGCT	58.796	20	GCACCCGATACTTGTACTCG	58.164	20	224	81	304	ATTACCCGGTCATCACAGCT	58.796	20	CGCACCCGATACTTGTACTC	58.164	20	225	81	305
scaf_0000239_2	p4	(TTAT)5	20	151	170	TGGTTGCAACGCATAGAAGG	58.836	20	AGTCACCCCTTCTTTCTCGG	59.023	20	240	22	261	TGGTTGCAACGCATAGAAGG	58.836	20	GTCACCCCTTCTTTCTCGGA	59.026	20	239	22	260	TGGTTGCAACGCATAGAAGG	58.836	20	ACCCCTTCTTTCTCGGATGG	59.088	20	236	22	257
scaf_0000239_25	p3	(TTA)5	15	151	165	CCACTGGATCACAAAGTGCC	59.116	20	TCACTTGCTCAACTGCTAGC	58.199	20	193	87	279	CCACTGGATCACAAAGTGCC	59.116	20	CACTTGCTCAACTGCTAGCT	58.194	20	192	87	278	TGGATCACAAAGTGCCTCCA	59.23	20	TCACTTGCTCAACTGCTAGC	58.199	20	189	91	279
scaf_0000241_15	p4	(AATA)5	20	151	170	GCACCATTCGTGGTTATCCC	58.978	20	AGGGTGGGGGTTCAAAGAAT	58.833	20	122	112	233	AAAACAGCACTCGCACCATT	58.968	20	AGGGTGGGGGTTCAAAGAAT	58.833	20	134	100	233	AAAAACAGCACTCGCACCAT	58.968	20	AGGGTGGGGGTTCAAAGAAT	58.833	20	135	99	233
scaf_0000243_1	p3	(TTA)15	45	284	328	CGCCAAGCTCTTCACTTTGA	58.771	20	ATGAGGAACAACCCATGTGG	57.779	20	240	35	274	TCGCCAAGCTCTTCACTTTG	58.771	20	ATGAGGAACAACCCATGTGG	57.779	20	241	34	274	TCTCGCCAAGCTCTTCACTT	59.318	20	ATGAGGAACAACCCATGTGG	57.779	20	243	32	274
scaf_0000248_9	p3	(ATT)9	27	151	177	TGGTTATGGGCTGCAGAGAT	58.784	20	ACCACATTAGCCACACATCAC	58.564	21	209	102	310	ATGGTTATGGGCTGCAGAGA	58.784	20	ACCACATTAGCCACACATCAC	58.564	21	210	101	310	AGATGGTTATGGGCTGCAGA	58.784	20	ACCACATTAGCCACACATCAC	58.564	21	212	99	310
scaf_0000248_11	p3	(ATT)6	18	151	168	CTTGGAGACACGAGTGCTTG	58.857	20	AGCCTCCACTTCCATTTCCA	58.924	20	103	24	126	TTGGAGACACGAGTGCTTGT	59.536	20	AGCCTCCACTTCCATTTCCA	58.924	20	102	25	126	TTTGCTTGGAGACACGAGTG	58.418	20	AGCCTCCACTTCCATTTCCA	58.924	20	107	20	126
scaf_0000248_20	p3	(AAT)5	15	151	165	GAGGAGCGTGTGTGTTGTTT	58.986	20	TCTGGGAGAAGCCAGTGAAG	59.02	20	191	13	203	GAGGAGCGTGTGTGTTGTTT	58.986	20	CTGGGAGAAGCCAGTGAAGT	59.31	20	190	13	202	GAGGAGCGTGTGTGTTGTTT	58.986	20	TGGGAGAAGCCAGTGAAGTC	59.313	20	189	13	201
scaf_0000248_29	p3	(AAG)5	15	151	165	TGTGTCACTTTGGTCCCTGA	58.791	20	TCAATCTGAGCGGATCGTGT	59.182	20	121	91	211	TGTCACTTTGGTCCCTGACT	58.493	20	TCAATCTGAGCGGATCGTGT	59.182	20	119	93	211	GTGTCACTTTGGTCCCTGAC	58.406	20	TCAATCTGAGCGGATCGTGT	59.182	20	120	92	211
scaf_0000248_37	p3	(TTC)10	30	151	180	ACCCCCGACAAACTCTCATT	58.935	20	ACGTATCGGCTTCTTGGGAA	59.1	20	194	118	311	ACCCCCGACAAACTCTCATT	58.935	20	CTCCATCCACGGTCTTAGCT	58.885	20	141	118	258	CCTATCACCCCCGACAAACT	59.09	20	ACGTATCGGCTTCTTGGGAA	59.1	20	200	112	311
scaf_0000249_1	p3	(TCT)7	21	151	171	TCATCCATAACTCCCTCGGG	58.283	20	ATGATGTTGTTTTGCGTCGC	58.315	20	100	219	318	CATCCATAACTCCCTCGGGT	58.575	20	GATGATGTTGTTTTGCGTCGC	59.356	21	100	220	319	ATCATCCATAACTCCCTCGGG	58.739	21	ATGATGTTGTTTTGCGTCGC	58.315	20	101	218	318
scaf_0000249_5	p3	(TTC)5	15	151	165	TTGAAACAAGCTCCCCATGC	59.032	20	ACCACGCTCTGTCTTGTGTA	58.963	20	123	23	145	TTGAAACAAGCTCCCCATGC	59.032	20	AGATACCCACTGTGCCATCC	59.16	20	190	23	212	GCCTGGTTTGCCTAGTTCAG	58.831	20	AGATACCCACTGTGCCATCC	59.16	20	163	50	212
scaf_0000249_19	p3	(GTG)6	18	151	168	AATACGGCCTCCATCGGTAG	59.033	20	TGTTTCACGTCGACTGCATC	58.863	20	171	131	301	GAATACGGCCTCCATCGGTA	59.036	20	TGTTTCACGTCGACTGCATC	58.863	20	172	130	301	AATACGGCCTCCATCGGTAG	59.033	20	GTGTTTCACGTCGACTGCAT	59.141	20	172	131	302
scaf_0000249_20	p3	(ATT)6	18	151	168	CTCAGTTTCACTGCACCCTG	58.767	20	GGTGGGTGATTATCTCTTTCCC	58.178	22	187	16	202	ATGCTCAGTTTCACTGCACC	58.758	20	GGTGGGTGATTATCTCTTTCCC	58.178	22	190	13	202	CTCAGTTTCACTGCACCCTG	58.767	20	TGGGTGATTATCTCTTTCCCACT	58.888	23	185	16	200
scaf_0000250_13	p3	(CCA)5	15	151	165	AACAACAATTGCCACCACCA	58.801	20	TGGATCCACTCCTCTCCAGA	58.989	20	143	139	281	CCACCAACACCACCAATGAC	59.327	20	TGGATCCACTCCTCTCCAGA	58.989	20	123	159	281	AACAACAATTGCCACCACCA	58.801	20	CCTCGGCTTTCAATGGATCC	58.687	20	156	139	294
scaf_0000250_16	p3	(TTG)5	15	151	165	ATCCGGTATTGGCGGTACAT	58.947	20	TACCTCCAACCGTCTTGACC	59.029	20	132	94	225	ATCCGGTATTGGCGGTACAT	58.947	20	GAGGGGATGAACTGGAGGAG	58.873	20	154	94	247	GTACATGCATTGGTGGTGGG	59.183	20	TACCTCCAACCGTCTTGACC	59.029	20	118	108	225
scaf_0000250_17	p3	(TAA)5	15	151	165	ACTATCACGACCTGAACCCG	59.184	20	GGCTCTTATGTACGCACTGC	59.069	20	170	58	227	ACTATCACGACCTGAACCCG	59.184	20	ATGTACGCACTGCTCAATGG	58.627	20	163	58	220	ACTATCACGACCTGAACCCG	59.184	20	TACGGGCTCTTATGTACGCA	58.608	20	174	58	231
scaf_0000251_7	p3	(TTA)13	39	151	189	TGTGTGTTCACCGATCGACT	59.328	20	GTTTGACCAAGGGTAGTCGC	58.846	20	210	94	303	TGTGTGTTCACCGATCGACT	59.328	20	AAGGGTAGTCGCCTAGCATG	59.247	20	202	94	295	TGTGTGTTCACCGATCGACT	59.328	20	CAAGGGTAGTCGCCTAGCAT	59.247	20	203	94	296
scaf_0000252_2	p4	(TTTA)6	24	151	174	TCCCCTTCGAACCTTCTCTC	58.442	20	ACTGGGGCTTCTAATTGGGT	58.617	20	120	2	121	TCTCCCCTTCGAACCTTCTC	58.442	20	ACTGGGGCTTCTAATTGGGT	58.617	20	122	0	121	CCCCTTCGAACCTTCTCTCT	58.437	20	ACTGGGGCTTCTAATTGGGT	58.617	20	119	3	121
scaf_0000252_13	p3	(TTG)6	18	151	168	GCACCTCTAGCTAGGCAGAT	58.663	20	CACACCTTGTTCGTGCATCA	59.056	20	180	110	289	GCACCTCTAGCTAGGCAGAT	58.663	20	TGATGCACACCTTGTTCGTG	59.056	20	185	110	294	GCACCTCTAGCTAGGCAGAT	58.663	20	TGCAGTCATTGATGCACACC	59.117	20	194	110	303
scaf_0000253_17	p4	(TTTA)6	24	151	174	AGCATTGCATACTCCATGGT	57.258	20	CAAGAAGAAACAACATCACCCA	57.083	22	145	57	201	AGCATTGCATACTCCATGGT	57.258	20	ACAAGAAGAAACAACATCACCC	57.081	22	146	57	202	AGCATTGCATACTCCATGGTA	57.137	21	CAAGAAGAAACAACATCACCCA	57.083	22	145	57	201
scaf_0000254_5	p3	(AAG)5	15	151	165	AAACGCGAACCCTTTCACAA	58.904	20	TCCCTTTTCCTGTTGGGTGA	58.773	20	130	70	199	AACGCGAACCCTTTCACAAT	58.685	20	TCCCTTTTCCTGTTGGGTGA	58.773	20	129	71	199	TTCAACCTCCAAACGCGAAC	59.341	20	TCCCTTTTCCTGTTGGGTGA	58.773	20	140	60	199
scaf_0000254_10	p3	(CTC)5	15	151	165	TCCTCCAGAACAACCACCTC	58.943	20	TACTCATGTGGTGACTCCGG	58.817	20	277	16	292	TCCTCCAGAACAACCACCTC	58.943	20	GGAGTAGCGTTTGGAGAGGA	58.816	20	138	16	153	TCCTCCAGAACAACCACCTC	58.943	20	GGAGGAGTAGCGTTTGGAGA	58.816	20	141	16	156
scaf_0000254_22	p3	(GAA)5	15	151	165	TGACCCATCTTCCACAACCT	58.555	20	GACTTACACGCCACATGGTC	58.924	20	202	83	284	TGACCCATCTTCCACAACCT	58.555	20	TGAAGGACTTACACGCCACA	59.246	20	207	83	289	GCGTTGCATTTAGGTTCAGC	58.382	20	GACTTACACGCCACATGGTC	58.924	20	270	15	284
scaf_0000255_5	p3	(GTG)5	15	151	165	GGAGATTGTGGTGGTGGAGA	59.016	20	CATCCCACTCAACCTCACCT	59.013	20	106	95	200	GGAGATTGTGGTGGTGGAGA	59.016	20	CCACTACCACCATCTCCCTC	58.876	20	164	95	258	AGGTGAGGTTGAGTGGGATG	59.013	20	ACAAATCTCCACCACCACCA	59.15	20	134	181	314
scaf_0000257_3	p3	(TCA)5	15	151	165	AGCACAGTTCCAATGGCAAG	59.036	20	CTTGAAGACGAAGCAGAGCC	58.925	20	147	108	254	AGCACAGTTCCAATGGCAAG	59.036	20	CCTTGAAGACGAAGCAGAGC	58.925	20	148	108	255	GCACAGTTCCAATGGCAAGA	59.039	20	CTTGAAGACGAAGCAGAGCC	58.925	20	146	109	254
scaf_0000257_5	p4	(ATTT)5	20	151	170	AAACCTCAAGGGGGTGTCAA	59.069	20	AGACCGCTCACTTGTGTCTT	59.247	20	149	58	206	AACCTCAAGGGGGTGTCAAT	58.842	20	AGACCGCTCACTTGTGTCTT	59.247	20	148	59	206	AAACCTCAAGGGGGTGTCAA	59.069	20	GAGACCGCTCACTTGTGTCT	59.684	20	150	58	207
scaf_0000257_12	p3	(AAT)7	21	151	171	ACAGTCCTACTATATAGCTGGCA	58.001	23	GCACGAAAATGTAATGCAAAGC	58.022	22	100	213	312	AACAGTCCTACTATATAGCTGGC	57.013	23	GCACGAAAATGTAATGCAAAGC	58.022	22	101	212	312	312	312	312	312	312	312	312	312	312
scaf_0000260_5	p4	(AAAT)6	24	151	174	AAACCAAAAAGGGGCAAGCC	59.817	20	GCATGTCCGATGTTTAAGGCT	58.983	21	194	96	289	AAACCAAAAAGGGGCAAGCC	59.817	20	TCAGGACCGACTAGGATTTCG	58.978	21	215	96	310	AAACCAAAAAGGGGCAAGCC	59.817	20	CGACTAGGATTTCGGCATGTC	58.872	21	208	96	303
scaf_0000261_5	p4	(TTTA)6	24	151	174	TCACTAGGGTGATTGCTGCA	59.017	20	TGAGCAGGTTGAGGGATCTT	58.339	20	133	182	314	TCACTAGGGTGATTGCTGCA	59.017	20	TTGAGCAGGTTGAGGGATCT	58.339	20	134	182	315	TTCAATCTGTGGCCAAACCC	58.663	20	TCATCTGCAGCAATCACCCT	59.378	20	100	107	206
scaf_0000261_17	p4	(TTTA)5	20	151	170	GGACTTTGAGTCAATGGGCA	58.09	20	AGAGGATGATGGTGGTGGTG	59.085	20	155	63	217	TGGACTTTGAGTCAATGGGC	58.09	20	AGAGGATGATGGTGGTGGTG	59.085	20	156	62	217	GGACTTTGAGTCAATGGGCA	58.09	20	GAGGATGATGGTGGTGGTGA	59.088	20	154	63	216
scaf_0000261_18	p3	(CCA)5	15	151	165	AACTTGAACGCCTCTTGCAG	59.053	20	ACAGAGGCCTTGTTCTTCGA	58.951	20	214	75	288	GAACTTGAACGCCTCTTGCA	59.056	20	ACAGAGGCCTTGTTCTTCGA	58.951	20	215	74	288	AACTTGAACGCCTCTTGCAG	59.053	20	CTGTGGATGCGCAGAAAACT	59.123	20	161	75	235
scaf_0000262_1	p3	(GAA)5	15	151	165	GGCTAGGACCTGTATTCCCC	58.943	20	CAAGGAGCGTCGATTCTTGG	58.998	20	203	73	275	GGCTAGGACCTGTATTCCCC	58.943	20	CCAAGGAGCGTCGATTCTTG	58.998	20	204	73	276	ACCCTATTGGCCACACCTAC	59.083	20	CAAGGAGCGTCGATTCTTGG	58.998	20	235	41	275
scaf_0000262_14	p3	(ATA)9	27	151	177	GTTTCTCGACATACGGTGGC	59.003	20	TGCAGAATGGTGGGTCTTACT	59.015	21	138	87	224	TCTCGACATACGGTGGCATT	59.178	20	TGCAGAATGGTGGGTCTTACT	59.015	21	135	90	224	TTCTCGACATACGGTGGCAT	59.178	20	TGCAGAATGGTGGGTCTTACT	59.015	21	136	89	224
scaf_0000262_20	p3	(AAC)5	15	151	165	AGCGGGGCGAGGAATTATTA	58.947	20	TTTTCGTGCGGTGGTAGTTG	59.061	20	218	17	234	AGGGATAGAAAGAAGCGGGG	58.868	20	TTTTCGTGCGGTGGTAGTTG	59.061	20	231	4	234	GCGGGGCGAGGAATTATTAC	58.846	20	TTTTCGTGCGGTGGTAGTTG	59.061	20	217	18	234
scaf_0000264_2	p4	(TTTA)5	20	151	170	GCCCCCTATACTCTTGGCAT	58.932	20	TGTATTAGTAGCGCAAACGGA	57.493	21	264	37	300	GCCCCCTATACTCTTGGCAT	58.932	20	TTGTATTAGTAGCGCAAACGGA	58.152	22	265	37	301	TGTGCCCCCTATACTCTTGG	58.493	20	TGTATTAGTAGCGCAAACGGA	57.493	21	267	34	300
scaf_0000265_1	p3	(GGT)5	15	151	165	TGAGTCGGTCAGAATCGGAG	58.904	20	CACCCATCTCACACCACTCT	59.02	20	165	25	189	TGAGTCGGTCAGAATCGGAG	58.904	20	CTCACCCATCTCACACCACT	59.02	20	167	25	191	GTCGGTCAGAATCGGAGTCT	58.904	20	CACCCATCTCACACCACTCT	59.02	20	162	28	189
scaf_0000265_12	p3	(ATT)5	15	151	165	TGAAGGCTCAGGAGGTTGAG	59.02	20	TTGGTCTGGTAAAGGTGCCT	58.854	20	231	23	253	GAGGATCCACCATGCTCAGA	58.874	20	TTGGTCTGGTAAAGGTGCCT	58.854	20	214	40	253	AGGATCCACCATGCTCAGAG	58.87	20	TTGGTCTGGTAAAGGTGCCT	58.854	20	213	41	253
scaf_0000269_1	p3	(TGT)5	15	151	165	TGTTGTGTGGTGGTTTGGTG	59.109	20	TTTTGCAATCAGGACCAGCC	59.032	20	119	159	277	TGGTGGTTTGGTGCTCTAGT	58.863	20	TTTTGCAATCAGGACCAGCC	59.032	20	112	166	277	TGTGGTGGTTTGGTGCTCTA	59.159	20	TTTTGCAATCAGGACCAGCC	59.032	20	114	164	277
scaf_0000273_13	p3	(CTC)7	21	151	171	CTCCTTCTCCTCCTCCTCCT	59.066	20	GAAGTGACGATCGACAGCTG	58.736	20	100	144	243	CTCCTCCTTCTCCTCCTCCT	59.066	20	GAAGTGACGATCGACAGCTG	58.736	20	103	141	243	CTCCTCCTCCTTCTCCTCCT	59.066	20	GAAGTGACGATCGACAGCTG	58.736	20	106	138	243
scaf_0000273_14	p3	(CTC)7	21	21	41	CTTCTCCTCCTCCTCCTCCT	59.066	20	TAGCGCCGCTGATCTTTCTA	58.97	20	180	17	196	CTCCTTCTCCTCCTCCTCCT	59.066	20	TAGCGCCGCTGATCTTTCTA	58.97	20	183	14	196	CTCCTCCTTCTCCTCCTCCT	59.066	20	TAGCGCCGCTGATCTTTCTA	58.97	20	186	11	196
scaf_0000273_38	p3	(CTC)10	30	151	180	CTCTCTCAACCCACTGTCCA	58.658	20	TAAGGAGGAGGAGGAGGAGG	58.763	20	112	72	183	TCTCTCTCAACCCACTGTCC	58.366	20	TAAGGAGGAGGAGGAGGAGG	58.763	20	113	71	183	GCATCTGGTTCTAGTGCCGA	59.824	20	GAGGAGGAGGAGAGAGACCT	58.777	20	162	0	161
scaf_0000273_41	p4	(AAAT)5	20	151	170	GTACGAACTGAAGCAACGGG	59.212	20	TCTTTCCTTCTCTCTGAGCTCA	58.228	22	180	69	248	TACGAACTGAAGCAACGGGA	59.325	20	TCTTTCCTTCTCTCTGAGCTCA	58.228	22	179	70	248	GTACGAACTGAAGCAACGGG	59.212	20	TCTCTGAGCTCAATTTGTTCCAC	58.932	23	170	69	238
scaf_0000277_5	p4	(CAAA)5	20	151	170	CACTACAACCTTCTGCAGTGA	57.888	21	TGTGGGAAAATGCTACATCCA	57.552	21	246	28	273	TCACTACAACCTTCTGCAGTG	57.888	21	TGTGGGAAAATGCTACATCCA	57.552	21	247	27	273	CACTACAACCTTCTGCAGTGA	57.888	21	TTCTGAGAGTTTCCATTGCCA	57.493	21	169	28	196
scaf_0000278_3	p3	(AAG)10	30	151	180	GACATGTCCAATGCCCCTTC	58.894	20	TCTGAGCCCCTCTTTAAGGC	59.088	20	104	220	323	TCCAAATGACCCCTGGACAT	58.618	20	TAAGGCTAAGGTGGTGTGGG	59.011	20	105	205	309	ATCCAAATGACCCCTGGACA	58.618	20	TAAGGCTAAGGTGGTGTGGG	59.011	20	106	204	309
scaf_0000279_22	p3	(AAT)10	30	14	43	AAAAGCTCCGCATTAACCCC	58.817	20	CTCCTTTGTTTGAGTGCTTGTTG	58.892	23	276	44	319	AAAAGCTCCGCATTAACCCC	58.817	20	CCTTTGTTTGAGTGCTTGTTGA	57.891	22	274	44	317	AAAAGCTCCGCATTAACCCC	58.817	20	TCCTTTGTTTGAGTGCTTGTTG	57.891	22	275	44	318
scaf_0000279_32	p4	(TATT)5	20	151	170	TCTGAAGAAAACGCTATTCCGA	57.817	22	CACAAAGCTTAATGCACAGTGA	57.772	22	100	6	105	TCTGAAGAAAACGCTATTCCGA	57.817	22	TCACAAAGCTTAATGCACAGTG	57.772	22	101	6	106	CTGAAGAAAACGCTATTCCGAA	57.079	22	TCACAAAGCTTAATGCACAGTG	57.772	22	100	7	106
scaf_0000280_8	p3	(CAT)6	18	151	168	CACCGATAGCCCAAAACAGG	58.905	20	TGATGGTGGTGGAGTTGGAT	58.629	20	104	51	154	CACCGATAGCCCAAAACAGG	58.905	20	ATGATGGTGGTGGAGTTGGA	58.629	20	105	51	155	CCACCGATAGCCCAAAACAG	58.905	20	TGATGGTGGTGGAGTTGGAT	58.629	20	105	50	154
scaf_0000281_7	p4	(AAAT)6	24	151	174	AGGTGAAAACACACGCACAC	59.55	20	CAAGGCTGCTACCATCATCG	58.776	20	196	128	323	GGTGAAAACACACGCACACA	59.831	20	CAAGGCTGCTACCATCATCG	58.776	20	195	129	323	GTGAAAACACACGCACACAA	58.03	20	CAAGGCTGCTACCATCATCG	58.776	20	194	130	323
scaf_0000287_11	p3	(AAT)24	72	151	222	GGCAAAAACCCCTTGTCCTT	58.872	20	GATGGGAGAGGGATTGGGAG	58.937	20	103	268	370	ATGCAGGAGGAGTCGAGTAC	58.605	20	GATGGGAGAGGGATTGGGAG	58.937	20	149	222	370	ATGCAGGAGGAGTCGAGTAC	58.605	20	GGAGAGGGATTGGGAGGTTT	58.7	20	145	222	366
scaf_0000288_20	p4	(AAAT)6	24	151	174	GCTTTGTGTTTTTGAGCGCA	58.724	20	GGCAAATTCTCCAAGATTGTGT	57.474	22	151	129	279	TGCTTTGTGTTTTTGAGCGC	58.724	20	GGCAAATTCTCCAAGATTGTGT	57.474	22	152	128	279	GCTTTGTGTTTTTGAGCGCA	58.724	20	AGGCAAATTCTCCAAGATTGTG	57.204	22	152	129	280
scaf_0000288_26	p3	(AGA)9	27	151	177	GACCAGAACAGAAACAACCCA	58.35	21	CGTCGCTCATGTTCCTATGT	57.79	20	102	221	322	GACCAGAACAGAAACAACCCA	58.35	21	TCGTCGCTCATGTTCCTATGT	59.251	21	103	221	323	GACCAGAACAGAAACAACCCA	58.35	21	GCATCGTCGCTCATGTTCC	59.362	19	106	221	326
scaf_0000290_26	p3	(AAT)11	33	151	183	GTGTCTTCACACCTAGTGCC	58.203	20	TGGAAAGACTATGTCCTGATCCA	58.638	23	109	40	148	CCCAATGCTTGTTACATGGGT	58.821	21	TGTGCATTCCCCATAACTAGTT	57.415	22	244	89	332	ACCCAATGCTTGTTACATGGG	58.821	21	TGTGCATTCCCCATAACTAGTT	57.415	22	245	88	332
scaf_0000290_29	p3	(ATT)6	18	151	168	TGCAACCTCTTGTTTCCAAGG	58.969	21	GGGAGAGGTAGACTTGCTTCA	58.82	21	258	4	261	TGCAACCTCTTGTTTCCAAGG	58.969	21	TCAAGGGAGAGGTAGACTTGC	58.82	21	262	4	265	GCAACCTCTTGTTTCCAAGGT	58.968	21	GGGAGAGGTAGACTTGCTTCA	58.82	21	257	5	261
scaf_0000291_5	p4	(AATA)5	20	151	170	TGTGAAAAGCTTTGTCAGAGGA	58.115	22	TCAGTATGCTTGCCCGGTAA	59.094	20	214	2	215	TGTGAAAAGCTTTGTCAGAGGA	58.115	22	TTCAGTATGCTTGCCCGGTA	59.094	20	215	2	216	TGTGAAAAGCTTTGTCAGAGGA	58.115	22	ATGCTTGCCCGGTAAACTTG	59.112	20	209	2	210
scaf_0000292_18	p3	(AGT)5	15	151	165	ACCCTGCACAACATGAGGTA	58.936	20	GAGGTCTCCATGTAAATTACCCT	57.368	23	234	10	243	GCACAACATGAGGTAAGGCA	58.466	20	GAGGTCTCCATGTAAATTACCCT	57.368	23	229	15	243	TGCACAACATGAGGTAAGGC	58.466	20	GAGGTCTCCATGTAAATTACCCT	57.368	23	230	14	243
scaf_0000293_1	p3	(CTT)5	15	151	165	AGGATTGGAATGAGGTGGTGA	58.722	21	TGACTTCACTGATCGGAGGG	58.814	20	138	104	241	AGGATTGGAATGAGGTGGTGA	58.722	21	GACTTCACTGATCGGAGGGA	58.525	20	137	104	240	TGAGGTGGTGAAATGGTAGGA	58.373	21	TGACTTCACTGATCGGAGGG	58.814	20	128	114	241
scaf_0000293_11	p4	(AAAG)5	20	151	170	TTCTCACAGTTGATCGCCCT	59.023	20	GATGTGCGAGTGCTTCCAAT	58.91	20	195	49	243	ATGCATGAAATGGCAGTGCA	59.101	20	GATGTGCGAGTGCTTCCAAT	58.91	20	233	11	243	TTCTCACAGTTGATCGCCCT	59.023	20	ATGTGCGAGTGCTTCCAATG	59.193	20	194	49	242
scaf_0000294_4	p3	(CAC)5	15	151	165	TATCTCACCACCACCACCAC	59.019	20	ACAAGTCGGAAAAGTGTCGA	57.41	20	108	145	252	CTATCTCACCACCACCACCA	58.724	20	ACAAGTCGGAAAAGTGTCGA	57.41	20	109	144	252	TATCTCACCACCACCACCAC	59.019	20	ACAAGTCGGAAAAGTGTCGAA	58.104	21	108	145	252
scaf_0000295_2	p3	(TGA)7	21	151	171	CCCAAATTCGACCAAACACATG	58.684	22	AGAGTGCAGGCTCTTGAACT	58.945	20	190	0	189	CCCAAATTCGACCAAACACATG	58.684	22	AGTGCAGGCTCTTGAACTCA	59.239	20	188	0	187	CCCAAATTCGACCAAACACAT	57.341	21	AGAGTGCAGGCTCTTGAACT	58.945	20	190	0	189
scaf_0000295_32	p3	(TAA)7	21	151	171	TGATTCCCACTTTCCAGGGT	58.544	20	TGATACAACCCACTCGTGCT	59.026	20	107	8	114	TGATTCCCACTTTCCAGGGT	58.544	20	GATACAACCCACTCGTGCTG	58.64	20	106	8	113	GATTCCCACTTTCCAGGGTG	58.161	20	TGATACAACCCACTCGTGCT	59.026	20	106	9	114
scaf_0000295_34	p3	(ATA)5	15	332	346	TGCGATTTGCTGCTGAAGAG	59.199	20	TGTCCAAAAGGACAAGCTCA	57.273	20	174	88	261	GTGCGATTTGCTGCTGAAGA	59.481	20	TGTCCAAAAGGACAAGCTCA	57.273	20	175	87	261	TGCGATTTGCTGCTGAAGAG	59.199	20	TGTCCAAAAGGACAAGCTCAA	57.988	21	174	88	261
scaf_0000295_35	p3	(ATA)5	15	151	165	CCAAGTGATATAAACTGGCACGT	59.061	23	AGGTCTGCATTCATGATATGGT	57.281	22	104	195	298	TCCAAGTGATATAAACTGGCACG	58.812	23	AGGTCTGCATTCATGATATGGT	57.281	22	105	194	298	CCAAGTGATATAAACTGGCACGT	59.061	23	CTGCATTCATGATATGGTTGGAC	57.883	23	100	195	294
scaf_0000296_9	p4	(AAAC)6	24	151	174	GAGGCCAGATCTTCTTCCTCA	58.885	21	GAAGAGCTGTTCCCAGACGT	59.681	20	103	211	313	AGGCCAGATCTTCTTCCTCA	57.739	20	GAAGAGCTGTTCCCAGACGT	59.681	20	102	212	313	AGAGGCCAGATCTTCTTCCTC	58.602	21	GAAGAGCTGTTCCCAGACGT	59.681	20	104	210	313
scaf_0000296_13	p3	(TAA)10	30	304	333	GATAAGGGGTTGAGGGGGAG	58.859	20	TGATAACGGTGGTGGGTTGA	58.943	20	106	21	126	GATAAGGGGTTGAGGGGGAG	58.859	20	GTGATAACGGTGGTGGGTTG	58.838	20	107	21	127	AAGGGGTTGAGGGGGAGATA	59.271	20	TGATAACGGTGGTGGGTTGA	58.943	20	103	24	126
scaf_0000296_14	p3	(TAA)11	33	151	183	AGAGAGAGAGAGAGAGAGAGAGA	57.864	23	TCCTCAGACTTTTTCTCTCCCT	58.137	22	114	9	122	AGAGAGAGAGAGAGAGAGAGAGA	57.864	23	TCCTCAGACTTTTTCTCTCCCT	58.137	22	116	7	122	AGAGAGAGAGAGAGAGAGAGAGA	57.864	23	TCCTCAGACTTTTTCTCTCCCT	58.137	22	118	5	122
scaf_0000297_1	p3	(TTA)5	15	151	165	AGAGTTGTCGGTAGTCCACA	58.009	20	ACCTTCAAATGTGGACTACCG	57.946	21	204	5	208	AGAGTTGTCGGTAGTCCACA	58.009	20	CCTTCAAATGTGGACTACCGA	57.672	21	203	5	207	AGAGTTGTCGGTAGTCCACA	58.009	20	ACCTTCAAATGTGGACTACCGA	59.364	22	204	5	208
scaf_0000297_5	p3	(TGG)5	15	151	165	GAGGAGGGAATTGGTGGTGA	59.008	20	CGAACAAAACCAAGCCCTGA	58.971	20	124	98	221	AATTGGTGGTGATTGTGGGC	59.024	20	CGAACAAAACCAAGCCCTGA	58.971	20	116	106	221	GAGGAGGGAATTGGTGGTGA	59.008	20	ACAGCATCAACCGTTTGACC	59.048	20	143	98	240
scaf_0000298_3	p3	(TAG)5	15	151	165	CAGCTTTGCTCTTCCTTGCA	59.043	20	GCCAAGGAGGTCATTGCATT	58.811	20	118	195	312	GGCATGATGTTCAGCAGCTT	59.184	20	GCCAAGGAGGTCATTGCATT	58.811	20	132	181	312	TTCAGCAGCTTTGCTCTTCC	58.758	20	GCCAAGGAGGTCATTGCATT	58.811	20	123	190	312
scaf_0000298_18	p3	(AAG)8	24	151	174	CGCAACTTGGAGTAAGGCAG	59.201	20	GCCGTAATGCATGACTCACC	59.342	20	136	74	209	CGCAACTTGGAGTAAGGCAG	59.201	20	TGCCGTAATGCATGACTCAC	58.631	20	137	74	210	AATGGAGGACGGACAGACAA	58.652	20	GCCGTAATGCATGACTCACC	59.342	20	199	11	209
scaf_0000299_18	p4	(TTTA)5	20	151	170	TTGGCCATGTGACATCGTTC	58.836	20	ATACATGAGTCTTCCCGCGT	58.888	20	114	193	306	AACCACACTGATTGGCCATG	58.74	20	ATACATGAGTCTTCCCGCGT	58.888	20	125	182	306	TTGGAACCACACTGATTGGC	58.673	20	ATACATGAGTCTTCCCGCGT	58.888	20	129	178	306
scaf_0000299_20	p3	(CCA)5	15	151	165	CTCGCCATCACTACCCATCT	58.956	20	GTAGTGGTGGGTGGTAGTGG	59.388	20	154	70	223	CTCGCCATCACTACCCATCT	58.956	20	GGTAGTGGTGGGTGGTAGTG	59.388	20	155	70	224	CTCGCCATCACTACCCATCT	58.956	20	GTGGTAGTGGTGGGTGGTAG	59.388	20	157	70	226
scaf_0000300_5	p4	(AAAT)5	20	151	170	AGGTTGGTTTGCATTCCACA	58.213	20	ACAAAGTCACCGGCAACAAG	59.262	20	212	87	298	AGGTTGGTTTGCATTCCACA	58.213	20	TTCACAAAGTCACCGGCAAC	59.264	20	215	87	301	AGGTTGGTTTGCATTCCACA	58.213	20	GTTCACAAAGTCACCGGCAA	59.264	20	216	87	302
scaf_0000301_15	p3	(ATC)6	18	151	168	TACTATGTCCACCCCTCCCT	58.674	20	GGAGGCGATAACAGTGGAGA	58.888	20	112	74	185	TACTATGTCCACCCCTCCCT	58.674	20	TGGAGGCGATAACAGTGGAG	59.176	20	113	74	186	TACTATGTCCACCCCTCCCT	58.674	20	ATGGAGGCGATAACAGTGGA	58.504	20	114	74	187
scaf_0000302_1	p3	(GGT)9	27	151	177	GCGAAAAATAGACCGCGAGT	59.003	20	GACCACCAAACCTCACCCTA	58.938	20	183	66	248	GCGAAAAATAGACCGCGAGT	59.003	20	CTCAACGTACACCACCAACG	59.143	20	152	66	217	CACAGAGGCGTGAGAGAAGA	59.115	20	GACCACCAAACCTCACCCTA	58.938	20	247	2	248
scaf_0000304_2	p4	(ATAC)7	28	151	178	AGGGTTTGTTTCAGTGAAAGCA	58.904	22	AGATACATTGCTTGCTCATGC	57.015	21	245	79	323	AGGGTTTGTTTCAGTGAAAGCA	58.904	22	AAGATACATTGCTTGCTCATGC	57.697	22	246	79	324	GGGTTTGTTTCAGTGAAAGCA	57.481	21	AGATACATTGCTTGCTCATGC	57.015	21	244	80	323
scaf_0000305_6	p3	(TTA)5	15	151	165	ATCGGCGCTTGTAACAAGTC	58.924	20	CACATGGTTACTAACGGGTCAC	59.002	22	131	5	135	GGCGCTTGTAACAAGTCGAA	59.137	20	CACATGGTTACTAACGGGTCAC	59.002	22	128	8	135	ATCGGCGCTTGTAACAAGTC	58.924	20	TCACATGGTTACTAACGGGTCA	59.101	22	132	5	136
scaf_0000306_10	p3	(TTC)9	27	151	177	TTGGCCTATCCCTTGTGAGG	59.081	20	CGGTGAACAGTGACGTGAAC	59.425	20	112	102	213	TTGGCCTATCCCTTGTGAGG	59.081	20	GGTGAACAGTGACGTGAACA	58.353	20	111	102	212	TTGGCCTATCCCTTGTGAGG	59.081	20	ACGGTGAACAGTGACGTGAA	59.826	20	113	102	214
scaf_0000306_28	p4	(GTAT)7	28	151	178	GCCAGGTGGTGATTCACTTC	58.831	20	AACAGAGCAACTACCGTGTT	57.385	20	105	0	104	GCCAGGTGGTGATTCACTTC	58.831	20	AAACAGAGCAACTACCGTGT	57.385	20	106	0	105	CCAGGTGGTGATTCACTTCG	58.557	20	AACAGAGCAACTACCGTGTT	57.385	20	104	1	104
scaf_0000308_16	p3	(TTA)5	15	151	165	GGTCCATTGGTTCATAGCCAC	58.976	21	TGCTTCACACTTCTCATGCA	57.741	20	234	38	271	GGTCCATTGGTTCATAGCCAC	58.976	21	GCATTCATGAAGCATCCCTCA	58.696	21	217	38	254	GGTCCATTGGTTCATAGCCAC	58.976	21	TGCATTCATGAAGCATCCCTC	58.696	21	218	38	255
scaf_0000310_21	p3	(AGA)5	15	151	165	TAGCTCCTTGACGTGGAACC	59.393	20	CCTACAGAGTTGAGTAGTTTCGG	58.265	23	222	41	262	TAGCTCCTTGACGTGGAACC	59.393	20	CCCTACAGAGTTGAGTAGTTTCG	58.265	23	223	41	263	TGTCTGCCAAACAAACCCAA	58.438	20	CCTACAGAGTTGAGTAGTTTCGG	58.265	23	190	73	262
scaf_0000311_12	p3	(CAT)5	15	151	165	ACCAACACTTGCACACCATT	58.516	20	TGGTTCTGTTCCTCCTCAGA	57.601	20	222	6	227	ACACTTGCACACCATTGTCA	58.239	20	TGGTTCTGTTCCTCCTCAGA	57.601	20	218	10	227	ACCAACACTTGCACACCATT	58.516	20	TTCGGCGACCATAATGACTT	57.316	20	103	6	108
scaf_0000311_14	p3	(GAA)5	15	151	165	AACAGCGTACCTGGTTTGTG	58.695	20	GAAGCAAAGCAAGCAGACCT	59.043	20	102	163	264	AACAGCGTACCTGGTTTGTG	58.695	20	AGAAGCAAAGCAAGCAGACC	59.043	20	103	163	265	AGAAGAACAGCGTACCTGGT	58.661	20	GAAGCAAAGCAAGCAGACCT	59.043	20	107	158	264
scaf_0000312_11	p3	(TGA)5	15	151	165	TGGGAGGATGGAGAATGAGC	58.865	20	CGACGTGAGCTTGAACCAAT	58.852	20	150	123	272	GCTGATTGGGAGGATGGAGA	58.865	20	CGACGTGAGCTTGAACCAAT	58.852	20	156	117	272	TGAATGGCTGATTGGGAGGA	58.702	20	CGACGTGAGCTTGAACCAAT	58.852	20	162	111	272
scaf_0000312_14	p3	(AGA)5	15	151	165	TTGGCTTTGATGCAGGACAG	58.75	20	CCTTATGGATTGCGTGATGCA	59.051	21	179	60	238	CGCTGTAAGGGCTGTTATGG	58.7	20	CCTTATGGATTGCGTGATGCA	59.051	21	159	80	238	TTGGCTTTGATGCAGGACAG	58.75	20	TCCTTATGGATTGCGTGATGC	58.779	21	180	60	239
scaf_0000313_1	p4	(ATTT)8	32	151	182	GAAGAGGCGCCATGGAAATT	58.894	20	ATTGTTTGAGTCGGCAGAGC	58.84	20	170	45	214	AATAGGCAGGAGGAAGAGGC	58.864	20	ATTGTTTGAGTCGGCAGAGC	58.84	20	182	33	214	GAAGAGGCGCCATGGAAATT	58.894	20	GAGCACACCGTCGCAATAAA	59.206	20	154	45	198
scaf_0000313_8	p4	(TTTA)5	20	151	170	TCAACTCCACTGCAACTTGC	58.976	20	AGCCCAGGACCTTATGCTTT	58.997	20	180	112	291	ACCGTTGGTTGTAACTTGCC	58.973	20	AGCCCAGGACCTTATGCTTT	58.997	20	109	183	291	TCAACTCCACTGCAACTTGC	58.976	20	TGGTCTTCCATTTGGAGCCT	58.924	20	161	112	272
scaf_0000314_5	p4	(TGAA)5	20	151	170	AAGCAGCTGGTACTGAGGAG	59.099	20	GACAGCTCGCATGTCATAACA	58.729	21	275	8	282	GAAGCAGCTGGTACTGAGGA	59.102	20	GACAGCTCGCATGTCATAACA	58.729	21	276	7	282	CTGGTACTGAGGAGGCTGAG	58.89	20	GACAGCTCGCATGTCATAACA	58.729	21	269	14	282
scaf_0000314_15	p3	(TTA)6	18	151	168	CAAATGGCCCGAAACTGTCA	59.042	20	TAGGGGGCCACAAATCTTGT	58.919	20	100	207	306	TCAAATGGCCCGAAACTGTC	58.756	20	TAGGGGGCCACAAATCTTGT	58.919	20	101	206	306	CTCAAATGGCCCGAAACTGT	58.752	20	TAGGGGGCCACAAATCTTGT	58.919	20	102	205	306
scaf_0000315_4	p3	(ATT)5	15	151	165	GTGCATGCGATCCTTGTGTA	58.631	20	AGGGTCCGAATGAATGTCCG	59.822	20	266	48	313	GTGCATGCGATCCTTGTGTA	58.631	20	GGGTCCGAATGAATGTCCGA	59.823	20	265	48	312	CTGAAAACCGTCACGTGCAT	59.414	20	AGGGTCCGAATGAATGTCCG	59.822	20	280	34	313
scaf_0000315_8	p3	(ATT)5	15	151	165	GTCACGTGCATGCAATCCTT	59.477	20	GGGTCCGAATGAGTATCCGA	58.675	20	270	43	312	TCACGTGCATGCAATCCTTG	59.477	20	GGGTCCGAATGAGTATCCGA	58.675	20	269	44	312	GTCACGTGCATGCAATCCTT	59.477	20	AGGGTCCGAATGAGTATCCG	58.671	20	271	43	313
scaf_0000316_8	p4	(TTAT)5	20	151	170	TGAAGGACTGACACAGTGAGT	58.611	21	TCAGAGCCTCCTACTGGACT	58.996	20	173	119	291	ATGAAGGACTGACACAGTGAGT	59.031	22	TCAGAGCCTCCTACTGGACT	58.996	20	174	118	291	AGGACTGACACAGTGAGTAGT	57.769	21	TCAGAGCCTCCTACTGGACT	58.996	20	170	122	291
scaf_0000317_9	p3	(ACA)5	15	151	165	CCAAAGACACCCAAACACCC	59.25	20	AGTGTCGTGGTTGAGGCATA	59.026	20	161	52	212	CCAAAGACACCCAAACACCC	59.25	20	TAGTGTCGTGGTTGAGGCAT	59.026	20	162	52	213	CCAAAGACACCCAAACACCC	59.25	20	CGTCTTTGAGTCCGAGGAGT	59.118	20	136	52	187
scaf_0000317_19	p4	(AAAT)5	20	151	170	TGTAGAAGAGTCATTCCCCCT	57.508	21	TCATTGTGGACCCAGACTAGA	57.816	21	106	210	315	AGCTTACATGCCTGTTGAAAGA	58.245	22	TCATTGTGGACCCAGACTAGA	57.816	21	193	123	315	TGTAGAAGAGTCATTCCCCCTT	58.197	22	TCATTGTGGACCCAGACTAGA	57.816	21	106	210	315
scaf_0000318_8	p3	(CAA)5	15	151	165	AACAGCTGGCTACGACTTCT	59.03	20	TCTGCCTGAACGGGAAGAAT	59.016	20	124	163	286	AACAGCTGGCTACGACTTCT	59.03	20	ATCTGCCTGAACGGGAAGAA	59.016	20	125	163	287	AACAACAACAGCTGGCTACG	59.056	20	TCTGCCTGAACGGGAAGAAT	59.016	20	130	157	286
scaf_0000320_3	p3	(GAA)5	15	151	165	TGGCATTAATCAAGGTCATGCA	58.636	22	GACGATTTTGGGGCTCTTCA	58.179	20	128	19	146	TGGCATTAATCAAGGTCATGCA	58.636	22	TGACGATTTTGGGGCTCTTC	58.179	20	129	19	147	TGGCATTAATCAAGGTCATGCA	58.636	22	TCATTGACGATTTTGGGGCTC	58.908	21	133	19	151
scaf_0000320_15	p3	(AAG)11	33	1	33	TGCTGAAGAATGCCACCAAG	58.75	20	TGACATCCCAGTCATCTCTCA	57.894	21	101	182	282	GATGCTGAAGAATGCCACCA	58.533	20	TGACATCCCAGTCATCTCTCA	57.894	21	103	180	282	GCTGAAGAATGCCACCAAGA	58.462	20	TGACATCCCAGTCATCTCTCA	57.894	21	100	183	282
scaf_0000320_15	p3	(GAA)7	21	151	171	TGCTGAAGAATGCCACCAAG	58.75	20	TGACATCCCAGTCATCTCTCA	57.894	21	101	182	282	GATGCTGAAGAATGCCACCA	58.533	20	TGACATCCCAGTCATCTCTCA	57.894	21	103	180	282	GCTGAAGAATGCCACCAAGA	58.462	20	TGACATCCCAGTCATCTCTCA	57.894	21	100	183	282
scaf_0000321_10	p3	(AAT)6	18	151	168	GTAGACTTGTGGGGCAGGAT	59.088	20	TGGGTGTAGAGACCAAGGTT	57.888	20	247	24	270	GTAGACTTGTGGGGCAGGAT	59.088	20	GGGTGTAGAGACCAAGGTTGT	59.302	21	246	24	269	GTAGACTTGTGGGGCAGGAT	59.088	20	TGGGTGTAGAGACCAAGGTTG	59.303	21	247	24	270
scaf_0000321_18	p4	(AAAT)6	24	151	174	ATGGGGATTAGACACGTGGG	59.163	20	CATAGAGCGACAACTGTGGG	58.355	20	103	3	105	ATGGGGATTAGACACGTGGG	59.163	20	TCCTAAGCAAACCCTCCCTT	58.245	20	125	3	127	CTTGGGACTTGGTGCAAAGG	59.324	20	TCCTAAGCAAACCCTCCCTT	58.245	20	101	27	127
scaf_0000322_3	p4	(CTTT)5	20	151	170	TCTCCTCTCCCTCACATGGA	58.989	20	TACGAGTTGGTGTTGGTGGA	58.879	20	122	87	208	TCTCCTCTCCCTCACATGGA	58.989	20	TGGACTTTCTCGGGGGAAAA	58.858	20	106	87	192	TCTCCTCTCCCTCACATGGA	58.989	20	GTGTTGGTGGACTTTCTCGG	58.773	20	113	87	199
scaf_0000324_17	p4	(TTTA)6	24	151	174	GCATGTCAGTTTGTGGGGTT	58.96	20	AATTCTAGCAGCACTTCGGC	58.626	20	109	126	234	CTGGCATGTCAGTTTGTGGG	59.4	20	GCACTTCGGCTCAATTCGAA	59.204	20	102	123	224	CTGGCATGTCAGTTTGTGGG	59.4	20	AATTCTAGCAGCACTTCGGC	58.626	20	112	123	234
scaf_0000326_25	p3	(CTC)11	33	151	183	CTTCTCCTCCTCCTCCTCCT	59.066	20	TCAATATCAGGGCCGGAGAC	58.951	20	103	147	249	CTCCTTCTCCTCCTCCTCCT	59.066	20	TCAATATCAGGGCCGGAGAC	58.951	20	106	144	249	TTCTCCTCCTCCTCCTCCTC	59.069	20	TCAATATCAGGGCCGGAGAC	58.951	20	102	148	249
scaf_0000327_14	p4	(TTAT)5	20	151	170	CATCAACATAGCCCGTTGTGA	58.645	21	CTTCCTCAGGGCAGCAATCT	59.745	20	139	127	265	TCATCAACATAGCCCGTTGTG	58.645	21	CTTCCTCAGGGCAGCAATCT	59.745	20	140	126	265	TCAACATAGCCCGTTGTGAA	57.447	20	CTTCCTCAGGGCAGCAATCT	59.745	20	137	129	265
scaf_0000327_15	p3	(TTC)6	18	151	168	TTGGCCTACCCTGTGGTTTT	59.441	20	TCCAAGCAGAATGGAGAAAGAAC	58.925	23	198	104	301	TTTGGCCTACCCTGTGGTTT	59.441	20	TCCAAGCAGAATGGAGAAAGAAC	58.925	23	199	103	301	TTTTGGCCTACCCTGTGGTT	59.441	20	TCCAAGCAGAATGGAGAAAGAAC	58.925	23	200	102	301
scaf_0000328_20	p3	(ATT)6	18	151	168	TGTGAATTGTAGGTTCGATCGT	57.817	22	TGTAAAAACGTCGGGCACAG	59.061	20	134	71	204	TGTGAATTGTAGGTTCGATCGT	57.817	22	TGTACGGGTACGGGTACATG	58.898	20	172	71	242	TGTGAATTGTAGGTTCGATCGT	57.817	22	GTACGGGTACGGGTACATGT	58.897	20	171	71	241
scaf_0000331_2	p3	(TAT)5	15	151	165	GGATTGGTGAGTGCAATGCA	59.11	20	TTGCACCTTACTGTTGGCAC	58.971	20	107	101	207	GGATTGGTGAGTGCAATGCA	59.11	20	GTTGCACCTTACTGTTGGCA	58.971	20	108	101	208	AGGATTGGTGAGTGCAATGC	58.82	20	TTGCACCTTACTGTTGGCAC	58.971	20	108	100	207
scaf_0000331_15	p3	(TTA)5	15	151	165	GTTGAGAGAGGGTGAGAGGG	58.809	20	TCCCCCATTACAAGGGTTCC	58.996	20	191	101	291	GTTGAGAGAGGGTGAGAGGG	58.809	20	ACCACCAGCTACTTACCCAC	59.018	20	116	101	216	GTTGAGAGAGGGTGAGAGGG	58.809	20	CACCACCAGCTACTTACCCA	59.019	20	117	101	217
scaf_0000331_19	p3	(AGA)13	39	151	189	TGAATGGAGGTTTCTTTCTGGTC	58.602	23	CCACATCAATGAAAGGAGGACC	58.98	22	104	3	106	TGAATGGAGGTTTCTTTCTGGT	57.547	22	CCACATCAATGAAAGGAGGACC	58.98	22	104	3	106	CGATGAATGGAGGTTTCTTTCTG	57.773	23	AATGAAAGGAGGACCAAGGGA	58.642	21	100	0	99
scaf_0000332_3	p3	(ACA)7	21	151	171	CCATCGCTAATGCCTATGCC	58.91	20	ACAAGGGCGGTTTCATCTTC	58.465	20	100	196	295	CCCATCGCTAATGCCTATGC	58.91	20	ACAAGGGCGGTTTCATCTTC	58.465	20	101	195	295	TCAAGGTTGGACAGGATGGA	58.259	20	TTTGACACCCCGGTATTGGA	58.934	20	142	97	238
scaf_0000332_21	p3	(AAT)5	15	151	165	CAGATGTGTTGGTGGTGTGA	58.034	20	TGCGTAGTTTTCACTTGCACA	58.99	21	211	2	212	TCAGATGTGTTGGTGGTGTG	58.034	20	TGCGTAGTTTTCACTTGCACA	58.99	21	212	1	212	CAGATGTGTTGGTGGTGTGA	58.034	20	GCACAAGGCACATTTCTCAC	57.944	20	195	2	196
scaf_0000332_21	p4	(TTAT)5	20	277	296	CAGATGTGTTGGTGGTGTGA	58.034	20	TGCGTAGTTTTCACTTGCACA	58.99	21	211	2	212	TCAGATGTGTTGGTGGTGTG	58.034	20	TGCGTAGTTTTCACTTGCACA	58.99	21	212	1	212	CAGATGTGTTGGTGGTGTGA	58.034	20	GCACAAGGCACATTTCTCAC	57.944	20	195	2	196
scaf_0000332_22	p3	(AAT)5	15	25	39	AGGTTGTTAAAGGGCCGTTG	58.676	20	TTTGACAAAACCAAGGCCCC	59.166	20	141	177	317	AGGTTGTTAAAGGGCCGTTG	58.676	20	AAGGCCCCGAACACTTAGAT	58.714	20	129	177	305	GAGGTTGTTAAAGGGCCGTT	58.387	20	TTTGACAAAACCAAGGCCCC	59.166	20	142	176	317
scaf_0000332_22	p4	(TTAT)5	20	151	170	AGGTTGTTAAAGGGCCGTTG	58.676	20	TTTGACAAAACCAAGGCCCC	59.166	20	141	177	317	AGGTTGTTAAAGGGCCGTTG	58.676	20	AAGGCCCCGAACACTTAGAT	58.714	20	129	177	305	GAGGTTGTTAAAGGGCCGTT	58.387	20	TTTGACAAAACCAAGGCCCC	59.166	20	142	176	317
scaf_0000333_10	p3	(AGA)5	15	151	165	TGAGAGTGAGAGGTGAGGGA	58.924	20	GAGTGAGTGGGACTGTGGAA	58.951	20	173	56	228	TGAGAGTGAGAGGTGAGGGA	58.924	20	CAGGGTTGAAGAATTGGGGC	59.102	20	227	56	282	TGAGAGTGAGAGGTGAGGGA	58.924	20	GCAGGGTTGAAGAATTGGGG	59.102	20	228	56	283
scaf_0000335_3	p3	(TGA)6	18	151	168	GTGGGGCATTCTTCATTGGT	58.439	20	AACCGATTGAGTATGGCCCA	59.084	20	262	33	294	GTGGGGCATTCTTCATTGGT	58.439	20	CAACCGATTGAGTATGGCCC	58.691	20	263	33	295	AGTGGGGCATTCTTCATTGG	58.143	20	AACCGATTGAGTATGGCCCA	59.084	20	263	32	294
scaf_0000336_23	p3	(ATG)7	21	151	171	AGCACAGGAGCAGAAACAGA	59.239	20	GCAGTGGCAAGACTTAATTCAC	58.174	22	120	0	119	GCACAGGAGCAGAAACAGAT	58.181	20	GCAGTGGCAAGACTTAATTCAC	58.174	22	119	1	119	AGCACAGGAGCAGAAACAGA	59.239	20	GCAGTGGCAAGACTTAATTCACT	59.496	23	120	0	119
scaf_0000337_3	p3	(TGG)7	21	151	171	CCAAGGACCTAAGCTTCAGC	58.256	20	CCACCAATGCATGTACCACC	59.183	20	143	13	155	CCAAGGACCTAAGCTTCAGC	58.256	20	CCACCACCAATGCATGTACC	59.183	20	146	13	158	CCAAGGACCTAAGCTTCAGC	58.256	20	CCAATGCATGTACCACCTCC	58.607	20	140	13	152
scaf_0000337_20	p4	(TTTA)5	20	151	170	CACCACATGTTTTGAAAGCAGG	58.875	22	TCAAAGCACCGATTTTCAGACA	58.79	22	141	114	254	CCACCACATGTTTTGAAAGCAG	58.875	22	TCAAAGCACCGATTTTCAGACA	58.79	22	142	113	254	CCACCACATGTTTTGAAAGCA	57.823	21	TCAAAGCACCGATTTTCAGACA	58.79	22	142	113	254
scaf_0000338_4	p3	(ATT)7	21	151	171	CGTCCAAACTGCCTAATCCG	58.993	20	TTGCGGGTTACGGTTTAACC	58.766	20	123	10	132	GTCCAAACTGCCTAATCCGC	59.267	20	TTGCGGGTTACGGTTTAACC	58.766	20	122	11	132	CCGTCCAAACTGCCTAATCC	58.62	20	TTGCGGGTTACGGTTTAACC	58.766	20	124	9	132
scaf_0000338_18	p3	(GGA)6	18	151	168	GGTGACGGTGAGTAGAGAGAG	58.989	21	GAAGATGCCTCCTCCTCCTC	58.952	20	167	10	176	GGTGTCATCTCTCTTGCGTT	57.914	20	GAAGATGCCTCCTCCTCCTC	58.952	20	136	41	176	AACGGTGTCATCTCTCTTGC	57.914	20	GAAGATGCCTCCTCCTCCTC	58.952	20	139	38	176
scaf_0000338_30	p3	(ATT)5	15	151	165	AGTCTAGGTTGGCAAACATTCA	57.901	22	GACCAGTGGGACAAAAAGTGA	58.35	21	125	86	210	AGTCTAGGTTGGCAAACATTCA	57.901	22	AGACCAGTGGGACAAAAAGTG	58.345	21	126	86	211	TCATAGATGTGGGCTCTTAGGA	57.801	22	GACCAGTGGGACAAAAAGTGA	58.35	21	189	22	210
scaf_0000340_20	p3	(TAT)6	18	151	168	TCCCTTTCCAAATCCCTCCC	58.992	20	AACCTCAGGTGGTGGAATGT	58.851	20	230	28	257	CCCTTTCCAAATCCCTCCCT	58.989	20	AACCTCAGGTGGTGGAATGT	58.851	20	229	29	257	CCCCAACCAAACACAGCATT	59.242	20	AACCTCAGGTGGTGGAATGT	58.851	20	204	54	257
scaf_0000341_14	p3	(TTC)5	15	151	165	GGAGGCCGAAGAGTCTAGAC	58.973	20	AGACTTTGTCTGCACTCGGA	58.959	20	240	63	302	ATCATGTTGGAGGCCGAAGA	59.088	20	AGACTTTGTCTGCACTCGGA	58.959	20	248	55	302	AGATCATGTTGGAGGCCGAA	59.088	20	AGACTTTGTCTGCACTCGGA	58.959	20	250	53	302
scaf_0000343_11	p3	(TCT)5	15	151	165	CTCTCCACTCCAAGGCTGTT	59.31	20	AGAGTACCTGGTGCTGGTTC	59.023	20	103	50	152	CTCTCCACTCCAAGGCTGTT	59.31	20	GAAGAGTACCTGGTGCTGGT	59.023	20	105	50	154	ACCAGCACCAGGTACTCTTC	59.023	20	ACTGAGCAAGGCAGATTCGA	59.39	20	165	135	299
scaf_0000344_5	p3	(ATA)6	18	151	168	GCAGTCGCAACTAGTAAGCT	58.002	20	CATGGCCAAGTGTGTCACTC	59.123	20	179	26	204	GCAGTCGCAACTAGTAAGCT	58.002	20	CTCGAACCCCCTGGATGATT	59.16	20	162	26	187	GCAGTCGCAACTAGTAAGCT	58.002	20	CAAGTGTGTCACTCGAACCC	58.782	20	173	26	198
scaf_0000344_9	p3	(ATT)5	15	151	165	ACCCATCTCAACCTCTCTCAC	58.816	21	GGGTTAGGTTTCGAAGGAGC	58.265	20	175	50	224	TGGCTCCTTTCCAAGTTTGAC	58.693	21	GGGTTAGGTTTCGAAGGAGC	58.265	20	194	31	224	GCTCCTTTCCAAGTTTGACCC	59.386	21	GGGTTAGGTTTCGAAGGAGC	58.265	20	192	33	224
scaf_0000344_12	p3	(TTA)5	15	151	165	TGTATCCAGCTTTGCTTGCA	58.092	20	CCGTCAAACCACACCCAATT	58.963	20	183	123	305	TGTATCCAGCTTTGCTTGCA	58.092	20	AAAACCGTCAAACCACACCC	59.181	20	187	123	309	TTGTATCCAGCTTTGCTTGCA	58.762	21	CCGTCAAACCACACCCAATT	58.963	20	184	122	305
scaf_0000344_18	p3	(TCT)6	18	151	168	TGACGATTGTCCAACACGAA	57.773	20	ACTCGAAGGTTTGACTCTAACA	57.068	22	215	75	289	TTGACGATTGTCCAACACGA	57.773	20	ACTCGAAGGTTTGACTCTAACA	57.068	22	216	74	289	TGACGATTGTCCAACACGAAA	58.448	21	ACTCGAAGGTTTGACTCTAACA	57.068	22	215	75	289
scaf_0000345_5	p3	(GAA)6	18	151	168	GGGAACATACTCCAACCACG	58.266	20	CGTGGGTAGAGTGTGTCCTT	59.033	20	250	40	289	GGGAACATACTCCAACCACG	58.266	20	TAGCGTGGGTAGAGTGTGTC	58.829	20	253	40	292	GGGAACATACTCCAACCACG	58.266	20	CTAGCGTGGGTAGAGTGTGT	58.825	20	254	40	293
scaf_0000345_13	p3	(ACA)5	15	151	165	CTTTGTTCAGCTCATCCCGG	58.91	20	AAGAACACCCGGTGGATCTT	58.935	20	251	8	258	CCTTTGTTCAGCTCATCCCG	58.91	20	AAGAACACCCGGTGGATCTT	58.935	20	252	7	258	CTTTGTTCAGCTCATCCCGG	58.91	20	CCGGTGGATCTTGAGCTGTA	59.176	20	243	8	250
scaf_0000346_4	p4	(AAAT)6	24	151	174	CTTGGTGGGCAAGAAAGTGG	59.324	20	GGAGAACCTAGCTCATTTTCTCT	57.648	23	187	65	251	CTTGGTGGGCAAGAAAGTGG	59.324	20	AGGAGAACCTAGCTCATTTTCTC	57.648	23	188	65	252	ACTTGGTGGGCAAGAAAGTG	58.597	20	GGAGAACCTAGCTCATTTTCTCT	57.648	23	188	64	251
scaf_0000346_8	p3	(TTA)7	21	151	171	ACTCGGGTTTAGGCTTTGGT	59.231	20	GCCCTTGATCGTCCCTTTTG	59.189	20	276	27	302	ACTCGGGTTTAGGCTTTGGT	59.231	20	TCGAGGTGCCATCACTTTGA	59.315	20	208	27	234	AGGACTCGGGTTTAGGCTTT	58.641	20	GCCCTTGATCGTCCCTTTTG	59.189	20	279	24	302
scaf_0000346_11	p4	(TTTA)5	20	151	170	TGGTGGTAGTTTGGTGGTGA	58.786	20	CAAAGAGCAGTCACCAAGCA	58.688	20	263	45	307	TGGTGGTAGTTTGGTGGTGA	58.786	20	GAGCAGTCACCAAGCAAACT	58.687	20	259	45	303	TGGTGGTAGTTTGGTGGTGA	58.786	20	AGAGCAGTCACCAAGCAAAC	58.687	20	260	45	304
scaf_0000347_2	p4	(TTTA)5	20	151	170	CACAGCTACCGATTGCAACA	58.844	20	CCATGCAAGGAGGAAAAATGC	58.375	21	141	73	213	TCACAGCTACCGATTGCAAC	58.561	20	CCATGCAAGGAGGAAAAATGC	58.375	21	142	72	213	CACAGCTACCGATTGCAACA	58.844	20	ACTTCCATGCAAGGAGGAAA	57.022	20	145	73	217
scaf_0000348_11	p3	(AAT)5	15	151	165	GCTTGAAGCTGACCTAAGGC	58.909	20	TGGGCCTAAGGTTGTTTTGT	57.537	20	218	70	287	GCTTGAAGCTGACCTAAGGC	58.909	20	GCCTAAGGCCGTTCTAGAATG	58.515	21	189	70	258	AAAGACGCTTGAAGCTGACC	58.77	20	TGGGCCTAAGGTTGTTTTGT	57.537	20	224	64	287
scaf_0000351_9	p3	(CCT)7	21	151	171	CCCCATTCTGCCAACCTTTC	59.102	20	AAGAGGAGGAGGAGGAGGAG	59.066	20	162	12	173	CCCCATTCTGCCAACCTTTC	59.102	20	AGGAAGAGGAGGAGGAGGAG	59.066	20	165	12	176	CCCCATTCTGCCAACCTTTC	59.102	20	AGGAGGAAGAGGAGGAGGAG	59.066	20	168	12	179
scaf_0000351_18	p3	(TTA)7	21	151	171	AGAAACCTCAGGGATGGAATGT	59.078	22	CCTCAAGTGTCCGATGCATG	58.988	20	142	62	203	AGAAACCTCAGGGATGGAATGT	59.078	22	TCCTCAAGTGTCCGATGCAT	59.095	20	143	62	204	AGAAACCTCAGGGATGGAATGT	59.078	22	ATCCTCAAGTGTCCGATGCA	59.095	20	144	62	205
scaf_0000351_19	p3	(TTG)8	24	151	174	CCTAGGGAAAAAGCTTCGCC	58.904	20	CAACAGTCTGAGACGGTCCT	59.038	20	167	73	239	CCCTAGGGAAAAAGCTTCGC	58.904	20	CAACAGTCTGAGACGGTCCT	59.038	20	168	72	239	CCTAGGGAAAAAGCTTCGCC	58.904	20	GTCTGAGACGGTCCTTCACA	59.04	20	162	73	234
scaf_0000352_3	p3	(TTC)5	15	151	165	TGGACGGTTTTTGGTATGCT	57.72	20	GCTTCTCTAGCTTGTTTGGCT	58.569	21	258	56	313	TCTCACTTCCTACTTCGCCC	58.816	20	AGAGAGACAGAGACAGAGACTG	58.057	22	252	3	254	CTCACTTCCTACTTCGCCCT	58.813	20	AGAGAGACAGAGACAGAGACTG	58.057	22	251	4	254
scaf_0000352_19	p3	(AAC)5	15	151	165	ACTTCCCCATCACCTTGGTT	58.842	20	TGGGGAAGTCTAAGCACTGG	59.016	20	114	185	298	CATTTGGGCGTCCTTCTCAC	59.195	20	TGGGGAAGTCTAAGCACTGG	59.016	20	230	69	298	CACATTTGGGCGTCCTTCTC	59.195	20	TGGGGAAGTCTAAGCACTGG	59.016	20	232	67	298
scaf_0000356_15	p3	(AAT)7	21	151	171	TCCAAACCGAAGATACCCTTC	57.378	21	GAGGGCTGACAGAGACAACT	59.027	20	135	116	250	TCCAAACCGAAGATACCCTTC	57.378	21	TGAGGGCTGACAGAGACAAC	59.318	20	136	116	251	TCCAAACCGAAGATACCCTTC	57.378	21	TTGAGGGCTGACAGAGACAA	58.576	20	137	116	252
scaf_0000356_16	p3	(ATC)5	15	151	165	AGTTGTCTCTGTCAGCCCTC	59.027	20	GATGGGGCGAAAATGGAGTC	58.975	20	208	45	252	AGTTGTCTCTGTCAGCCCTC	59.027	20	GTGGTTGTGGAGTCCTCTGA	58.951	20	166	45	210	AGTTGTCTCTGTCAGCCCTC	59.027	20	GCAAGTGCAGTACAGAGCTC	58.925	20	253	45	297
scaf_0000357_9	p4	(TTTA)5	20	151	170	CACCCTTTGTCTTCCACAGC	59.046	20	GTGCTGTCCCCCTGAACTAT	59.088	20	262	15	276	CACCCTTTGTCTTCCACAGC	59.046	20	GAATGTGATGTGCTGTCCCC	58.902	20	271	15	285	CACCCTTTGTCTTCCACAGC	59.046	20	GGAATGTGATGTGCTGTCCC	58.902	20	272	15	286
scaf_0000357_12	p3	(AAT)7	21	151	171	CCGATGTGACCAAATTGCCA	59.113	20	TAGTGCTGGGCTTAGGCTTT	59.008	20	226	38	263	CCGATGTGACCAAATTGCCA	59.113	20	TTAGTGCTGGGCTTAGGCTT	59.008	20	227	38	264	ATTAGAGGGTCCATTGGGCC	59.146	20	TAGTGCTGGGCTTAGGCTTT	59.008	20	147	117	263
scaf_0000358_10	p3	(TTC)6	18	151	168	ACAACCTTAACTCAACTGCACA	58.384	22	AGGGCTAAGTCTGATTAAGGTGG	59.544	23	100	95	194	GGTTACAACCTTAACTCAACTGC	57.895	23	GGCTAAGTCTGATTAAGGTGGC	58.793	22	102	91	192	ACAACCTTAACTCAACTGCACA	58.384	22	AGGGCTAAGTCTGATTAAGGTG	57.238	22	100	95	194
scaf_0000358_13	p3	(TCT)5	15	151	165	CTTGCCTAACCCTTGTGAGG	58.174	20	AGGGCCGAAAAATGCACTTT	58.952	20	131	110	240	CTTGCCTAACCCTTGTGAGG	58.174	20	AGGGTTGATTTGGGGGTGAT	58.907	20	164	110	273	TGTGTGAACTTGCCTAACCC	58.024	20	AGGGCCGAAAAATGCACTTT	58.952	20	139	102	240
scaf_0000359_2	p3	(AAC)6	18	151	168	CCCCCAAGTAGCAAGAGGAA	59.008	20	CCACCGACCAGTCTTCTCTT	59.03	20	232	26	257	CCCCCAAGTAGCAAGAGGAA	59.008	20	TACATACCACCACCACCGAC	59.103	20	244	26	269	CCCCCAAGTAGCAAGAGGAA	59.008	20	TACAGGTACAGGTGTTGCCC	59.312	20	183	26	208
scaf_0000359_4	p3	(GAA)13	39	1	39	AGAAGAAGAAGAAGAAGCGCT	57.324	21	GAAGCAGTGGACGGAAAACA	58.695	20	265	23	287	AGAAGAAGAAGAAGAAGCGCT	57.324	21	AGAAGCAGTGGACGGAAAAC	58.406	20	266	23	288	AGAAGAAGAAGAAGAAGCGCTT	57.998	22	GAAGCAGTGGACGGAAAACA	58.695	20	265	23	287
scaf_0000359_5	p3	(CTG)10	30	151	180	TGCTGCTGCTGCTTCTTTTT	59.252	20	GCAGAGCACTTGATCACTCG	59.002	20	158	169	326	TGTTTTCCGTCCACTGCTTC	58.695	20	GCAGAGCACTTGATCACTCG	59.002	20	267	60	326	TATTCTCTGCTGCTGCTGCT	59.46	20	GCAGAGCACTTGATCACTCG	59.002	20	183	144	326
scaf_0000359_14	p3	(ACC)5	15	151	165	AGATCAGCGTGGAGAGATGG	58.961	20	CATCCGCGAGTAGTTGTGTG	59.008	20	141	2	142	AGATCAGCGTGGAGAGATGG	58.961	20	GGTAATGGTATCGGAGGGGG	59.018	20	189	2	190	GAAAAGCCCGCGTATCTCAG	59.069	20	CATCCGCGAGTAGTTGTGTG	59.008	20	112	31	142
scaf_0000359_23	p3	(AGA)5	15	151	165	CCCTCCACAAATCCAAGATCC	58.341	21	TCATCACCATCATCACCATCAC	58.188	22	148	41	188	CCCTCCACAAATCCAAGATCC	58.341	21	CATCACCATCATCACCATCACT	58.183	22	147	41	187	CCCTCCACAAATCCAAGATCC	58.341	21	CATCACCATCATCACCATCACTT	58.795	23	147	41	187
scaf_0000359_31	p3	(CTT)12	36	151	186	CAGTGCGATGCTCTCTTGAC	59.002	20	TTTGATGCTGTCCCTTTCGC	59.119	20	139	100	238	ACCGCAACAAAGAATCGCAT	59.119	20	GTCAAGAGAGCATCGCACTG	59.002	20	113	7	119	ATTAAAAGGCCGCCGATGAC	58.978	20	TTTGATGCTGTCCCTTTCGC	59.119	20	184	55	238
scaf_0000359_32	p3	(CTT)12	36	1	36	GCGAAAGGGACAGCATCAAA	59.119	20	GTGGTTGCACTGCTAGCTTT	59.046	20	193	69	261	GCGAAAGGGACAGCATCAAA	59.119	20	CTTCTCCTTGCTTGTCTCGC	58.925	20	119	69	187	GCGAGACAAGCAAGGAGAAG	58.925	20	AAACAAGACGCAACCAGTGG	59.262	20	110	168	277
scaf_0000362_8	p4	(CCTT)6	24	151	174	GCCTTCCTTCCTTCCTTCCT	59.004	20	TCAACAAAGTCACTTGGCCG	58.979	20	110	149	258	ACTTCCAAAGGCGGTGTAGA	58.947	20	AGGAAGGAAGGAAGGAAGGC	59.004	20	131	38	168	ACTTCCAAAGGCGGTGTAGA	58.947	20	TCAACAAAGTCACTTGGCCG	58.979	20	221	38	258
scaf_0000363_20	p4	(CGGT)5	20	151	170	TGGGCTAGACTCATTGGACC	58.796	20	CACGCTCAATCTCAACCCAG	58.918	20	100	95	194	GGCTAGACTCATTGGACCCA	58.796	20	AGCCCAACCTAACCTCGTAC	59.1	20	133	97	229	TGGGCTAGACTCATTGGACC	58.796	20	AGCCCAACCTAACCTCGTAC	59.1	20	135	95	229
scaf_0000364_30	p3	(AAT)5	15	151	165	ACGGCATAGCACGGGTATTA	58.958	20	TGAAGATGGGGTTTGTGGAGT	59.22	21	246	44	289	CATATCACGGCATAGCACGG	58.929	20	TGAAGATGGGGTTTGTGGAGT	59.22	21	252	38	289	ACGGCATAGCACGGGTATTA	58.958	20	TGGGGTTTGTGGAGTTTGATG	58.685	21	240	44	283
scaf_0000365_5	p4	(AAAT)6	24	151	174	TGTAGCGGAAACTTGGCATG	58.836	20	TGGAATGTCATGCCCCAAAA	57.979	20	201	39	239	GTAGCGGAAACTTGGCATGT	58.835	20	TGGAATGTCATGCCCCAAAA	57.979	20	200	40	239	TGTAGCGGAAACTTGGCATG	58.836	20	ATGGAATGTCATGCCCCAAA	57.749	20	202	39	240
scaf_0000368_8	p4	(TTTG)6	24	151	174	TTGGGTCATGGCCAATTTGG	59.017	20	ACAACCCTAGCAACCATCCA	58.928	20	279	20	298	TTGGGTCATGGCCAATTTGG	59.017	20	ACCCTAGCAACCATCCAAGA	58.331	20	276	20	295	GGTCATGGCCAATTTGGGTA	58.141	20	ACAACCCTAGCAACCATCCA	58.928	20	276	23	298
scaf_0000368_15	p3	(TCT)6	18	278	295	TGTTCGGGAATCGGTAATCG	57.787	20	TCTCTGCTGCTTCATCCACT	58.726	20	221	40	260	TTGTTCGGGAATCGGTAATCG	58.457	21	TCTCTGCTGCTTCATCCACT	58.726	20	222	39	260	TTTGTTCGGGAATCGGTAATCG	59.069	22	TCTCTGCTGCTTCATCCACT	58.726	20	223	38	260
scaf_0000368_16	p3	(TCT)6	18	151	168	AGTGGATGAAGCAGCAGAGA	58.726	20	GCACTCACAGGTCCCAAAAA	58.601	20	109	114	222	AGTGGATGAAGCAGCAGAGA	58.726	20	ATGCACTCACAGGTCCCAAA	59.522	20	111	114	224	AGTGGATGAAGCAGCAGAGA	58.726	20	AATGCACTCACAGGTCCCAA	59.522	20	112	114	225
scaf_0000371_2	p4	(TTTA)5	20	151	170	TACGAGATTTTTGGCGGTGC	59.2	20	TGCGACTTGAGAGAAGAGCA	59.038	20	237	44	280	CTCCGACGATCTCCCTTACA	58.323	20	TGCGACTTGAGAGAAGAGCA	59.038	20	218	63	280	GCTCCGACGATCTCCCTTAC	59.689	20	TGCGACTTGAGAGAAGAGCA	59.038	20	219	62	280
scaf_0000372_6	p3	(CCA)6	18	151	168	GGGATGTGGGGCTCTAAAGT	59.08	20	GATTACCTGAGGTCCCTCCG	58.959	20	175	23	197	GGGATGTGGGGCTCTAAAGT	59.08	20	GCCTTACTCTCTGGGTCTCC	58.884	20	236	23	258	CCTGACTTAGGGATGTGGGG	59.16	20	GATTACCTGAGGTCCCTCCG	58.959	20	184	14	197
scaf_0000373_1	p4	(AAAT)5	20	151	170	CGCTCATAGTCTCGGGTCAT	59.045	20	CGTGCGGTGCCTCATAATTT	59.267	20	218	20	237	CGCTCATAGTCTCGGGTCAT	59.045	20	TATTTAACGTGCGGTGCCTC	58.638	20	225	20	244	ATCCACCAAGCGCTCATAGT	59.167	20	CGTGCGGTGCCTCATAATTT	59.267	20	228	10	237
scaf_0000373_14	p3	(TAT)6	18	151	168	CAAAGGGTGTCTTGCAGACC	59.046	20	TTTCCCTAGGCCATGTCGAA	58.719	20	165	83	247	CCAAAGGGTGTCTTGCAGAC	59.046	20	TTTCCCTAGGCCATGTCGAA	58.719	20	166	82	247	AGGGTGTCTTGCAGACCTTT	59.153	20	TTTCCCTAGGCCATGTCGAA	58.719	20	162	86	247
scaf_0000376_6	p3	(TGG)5	15	151	165	CTTTGGTTAACTGTCCCGGC	59.121	20	CTCCACCTCCACCTCCATTT	59.005	20	148	39	186	CTTTGGTTAACTGTCCCGGC	59.121	20	TCCACCTCCACCTCCATTTC	59.008	20	147	39	185	CTGTCCCGGCTACAAACTTG	58.843	20	CTCCACCTCCACCTCCATTT	59.005	20	138	49	186
scaf_0000376_13	p3	(TTA)5	15	151	165	GTCAGTTCTTCTTCACCGGC	58.851	20	AGCCCTCTTTTCCACCACAT	59.22	20	194	121	314	GTCAGTTCTTCTTCACCGGC	58.851	20	TCCACCACATTTAGCAGCAC	58.466	20	184	121	304	GTCAGTTCTTCTTCACCGGC	58.851	20	CCACCACATTTAGCAGCACT	58.462	20	183	121	303
scaf_0000377_1	p3	(AGA)14	42	151	192	GTCCAACTATCACTGCTGCG	58.998	20	GCAGTCACCACTACCTCTGT	59.03	20	236	87	322	GTCCAACTATCACTGCTGCG	58.998	20	ACTCTCCTCCACCACTCTCT	58.919	20	201	87	287	GTCCAACTATCACTGCTGCG	58.998	20	CCACCCGTCTCTTACTCTCC	58.895	20	214	87	300
scaf_0000378_5	p3	(AAT)6	18	151	168	TGCTCAACGGCGTCATAATG	58.994	20	TCGGTTTTAAAAGACCCCGC	58.762	20	258	54	311	TGCTCAACGGCGTCATAATG	58.994	20	CGGTTTTAAAAGACCCCGCT	58.759	20	257	54	310	TAAGCCGATTTGCTCAACGG	58.917	20	TCGGTTTTAAAAGACCCCGC	58.762	20	268	44	311
scaf_0000380_6	p3	(ATT)7	21	151	171	TGGGGTCGCAGTCAAAATTG	59.042	20	GGCTCAGCCTCTGCAAGATA	59.533	20	100	171	270	TTGGCATCGAAACAGACACA	58.04	20	CAATTTTGACTGCGACCCCA	59.042	20	127	64	190	GGCATCGAAACAGACACATCA	58.924	21	CAATTTTGACTGCGACCCCA	59.042	20	125	66	190
scaf_0000382_1	p3	(CAC)5	15	151	165	TACAATCACCACCACCACCA	58.859	20	CGAACTGTGGGAAGTCCTCT	59.03	20	125	144	268	CGCACGAAGAAAGTCGAGTC	59.297	20	CGAACTGTGGGAAGTCCTCT	59.03	20	145	124	268	GTAGGATGCCAATTCGCACC	59.337	20	CGAACTGTGGGAAGTCCTCT	59.03	20	180	89	268
scaf_0000386_4	p3	(TTA)7	21	151	171	TTTCTGGTGGGCATGAAACC	58.663	20	ACCTTTTGGCTAGGATGGCT	58.997	20	128	172	299	TTTCTGGTGGGCATGAAACC	58.663	20	TGGCTAGGATGGCTGTTGAA	59.009	20	122	172	293	TTTCTGGTGGGCATGAAACC	58.663	20	TTGGCTAGGATGGCTGTTGA	59.009	20	123	172	294
scaf_0000390_17	p3	(TTA)6	18	151	168	CCCAACCAAATGCCACGTTA	59.038	20	ACTCCCCATGGTTCACAACA	59.15	20	182	23	204	CCCAACCAAATGCCACGTTA	59.038	20	AGATGACAATGTTGCCGCAA	58.753	20	211	23	233	GTGTGCTCCCTCTCTCCAAA	59.313	20	ACTCCCCATGGTTCACAACA	59.15	20	152	53	204
scaf_0000391_2	p4	(TTTA)6	24	151	174	GGGACTACGGTGGTAACGAA	59.112	20	AACGCCAACCAAACCATCAA	58.885	20	261	61	321	GGGACTACGGTGGTAACGAA	59.112	20	AAACGCCAACCAAACCATCA	58.885	20	262	61	322	GGGACTACGGTGGTAACGAA	59.112	20	ACGCCAACCAAACCATCAAT	58.663	20	260	61	320
scaf_0000391_9	p3	(AAT)10	30	151	180	GCTTGAGATCGTCTAAAGAGAGC	58.958	23	TCCTTGCCTGGGTGAAAAGA	59.15	20	121	88	208	GCTTGAGATCGTCTAAAGAGAGC	58.958	23	GTTTCCTTGCCTGGGTGAAA	58.591	20	124	88	211	GCTTGAGATCGTCTAAAGAGAGC	58.958	23	ATGTTTCCTTGCCTGGGTGA	59.518	20	126	88	213
scaf_0000391_19	p4	(GGGA)6	24	151	174	GGAGGGAGGGAGGAGATAGA	58.538	20	GCAGTTCTGGAGCCTCTACA	59.102	20	116	163	278	GGAGGGAGGGAGGAGATAGA	58.538	20	AGCAGTTCTGGAGCCTCTAC	58.809	20	117	163	279	GGGAGGGAGGGAGGAGATAG	59.588	20	GCAGTTCTGGAGCCTCTACA	59.102	20	117	162	278
scaf_0000392_5	p3	(ATA)5	15	151	165	TTCAAGCCATCCATGCTCAC	58.533	20	CCCATAGAACTGCCCAAAGC	58.894	20	180	64	243	TTCAAGCCATCCATGCTCAC	58.533	20	GCCCATAGAACTGCCCAAAG	58.894	20	181	64	244	TTCAAGCCATCCATGCTCAC	58.533	20	CACAGCTGCCCATAGAACTG	58.623	20	188	64	251
scaf_0000392_7	p3	(AAT)7	21	151	171	GTCATGGGTTGGAGTTGCAG	59.116	20	ACAATGCGATCATCCAATGCT	58.696	21	169	57	225	GTCATGGGTTGGAGTTGCAG	59.116	20	CCTGGGCCTATTTACAATGCG	59.391	21	182	57	238	GTCATGGGTTGGAGTTGCAG	59.116	20	CTGGGCCTATTTACAATGCGA	58.429	21	181	57	237
scaf_0000393_2	p3	(AAG)5	15	151	165	TGATGTCGTCTGTTGGAGCT	59.031	20	ATTCAACGACAACGCAGAGG	58.852	20	209	82	290	TGATGTCGTCTGTTGGAGCT	59.031	20	CTTCCCAGGTTTACTGCTGC	58.831	20	161	82	242	GTGATGTCGTCTGTTGGAGC	58.928	20	ATTCAACGACAACGCAGAGG	58.852	20	210	81	290
scaf_0000393_10	p3	(GGT)5	15	482	496	ACCAAACGAGCCAAAATGGA	58.301	20	CTGGCTTTGGTTCACCGAAT	58.752	20	119	9	127	ATGGGAGAAAGGGTGGCAAT	59.288	20	TTTCCATCACCAACCACCAC	58.301	20	100	408	507	GTGTCATACCAAACGAGCCA	58.197	20	CTGGCTTTGGTTCACCGAAT	58.752	20	126	2	127
scaf_0000393_11	p3	(GGT)5	15	151	165	GTTTGGTGGAGGAGAAGGGT	59.228	20	TGAGGACTAAAGGCCCCAAA	58.549	20	104	133	236	GTTTGGTGGAGGAGAAGGGT	59.228	20	TTGAGGACTAAAGGCCCCAA	58.549	20	105	133	237	TTTGGTGGAGGAGAAGGGTG	59.229	20	TGAGGACTAAAGGCCCCAAA	58.549	20	103	134	236
scaf_0000396_6	p3	(TTA)7	21	151	171	TTCGTTTGCAGCCCTACCTA	59.022	20	ACACTTGCCAATGTTGTGCA	59.177	20	116	30	145	TTCGTTTGCAGCCCTACCTA	59.022	20	CACACTTGCCAATGTTGTGC	58.789	20	117	30	146	TTCGTTTGCAGCCCTACCTA	59.022	20	GCACACTTGCCAATGTTGTG	58.789	20	118	30	147
scaf_0000396_7	p3	(TTA)7	21	5	25	TGTAGCATTACTTGGTGGCG	58.267	20	TTGGCCCATTTTTAGCTCGG	58.818	20	146	112	257	GTAGCATTACTTGGTGGCGA	57.981	20	TTGGCCCATTTTTAGCTCGG	58.818	20	145	113	257	TGTAGCATTACTTGGTGGCG	58.267	20	GGCCCATTTTTAGCTCGGAA	58.53	20	144	112	255
scaf_0000396_11	p3	(CAC)10	30	151	180	ACCACCACCATTGAAAGTGC	58.96	20	CCATAGCTACTCGCCTCGAA	59.048	20	127	172	298	ACCACCACCATTGAAAGTGC	58.96	20	TTCCATAGCTACTCGCCTCG	59.048	20	129	172	300	AAACCCTAGATTGGCCCCAA	58.911	20	CCATAGCTACTCGCCTCGAA	59.048	20	101	198	298
scaf_0000397_10	p3	(TTA)12	36	265	300	CGATTTTCGTGTTGCGGTTG	58.958	20	AACCCTACCCCACATCTCAA	57.946	20	108	44	151	CGATTTTCGTGTTGCGGTTG	58.958	20	AAACCCTACCCCACATCTCA	57.946	20	109	44	152	TCGATTTTCGTGTTGCGGTT	59.061	20	AACCCTACCCCACATCTCAA	57.946	20	109	43	151
scaf_0000397_11	p3	(TTA)12	36	151	186	TGAGATGTGGGGTAGGGTTT	57.946	20	TCAAAGCCCCATTCCTCTTT	57.001	20	106	19	124	TGAGATGTGGGGTAGGGTTT	57.946	20	TTCAAAGCCCCATTCCTCTT	57.001	20	107	19	125	TTGAGATGTGGGGTAGGGTT	57.946	20	TCAAAGCCCCATTCCTCTTT	57.001	20	107	18	124
scaf_0000398_14	p3	(AAT)7	21	151	171	TATGAGTCTCATGCGGGTCC	58.959	20	AGCCATCACTCTTCCCATGT	58.707	20	191	3	193	TATGAGTCTCATGCGGGTCC	58.959	20	ACCAAGCCATCACTCTTCCC	59.67	20	195	3	197	TATGAGTCTCATGCGGGTCC	58.959	20	CCAAGCCATCACTCTTCCCA	59.671	20	194	3	196
scaf_0000400_14	p3	(ATC)9	27	151	177	TTTCTGATAGGGAGGGTCGC	58.879	20	GAGAGCAGGAACAAAGTCGC	59.207	20	107	206	312	GGGGCCTCTGATCTGATGAT	58.64	20	AAGTGTTCCTCCAGAGACCG	59.03	20	265	19	283	CTGGTGCTGGTGGTACTGAT	59.385	20	AAGTGTTCCTCCAGAGACCG	59.03	20	180	104	283
scaf_0000401_1	p3	(GAT)9	27	151	177	AGAGAGACGGGAGGTTTTGG	59.023	20	GACTCACTGCCTCCTAGTCC	58.892	20	141	67	207	AGAGAGACGGGAGGTTTTGG	59.023	20	GGACTCACTGCCTCCTAGTC	58.892	20	142	67	208	AGACGGGAGGTTTTGGCTTA	58.938	20	GACTCACTGCCTCCTAGTCC	58.892	20	137	71	207
scaf_0000403_5	p3	(TTC)9	27	151	177	GCCCTGATTTGCTGTGACTT	58.749	20	AGCTATGTGCAAAATTAGGGCA	58.635	22	223	63	285	TGATGTCAGCCCTGATTTGC	58.533	20	AGCTATGTGCAAAATTAGGGCA	58.635	22	231	55	285	TCCATGATGTCAGCCCTGAT	58.485	20	AGCTATGTGCAAAATTAGGGCA	58.635	22	235	51	285
scaf_0000403_15	p3	(TTA)6	18	151	168	ACTGGTTGACAAGGGTGACA	59.084	20	GCTCGGCTCAACTCGAATG	58.998	19	103	21	123	ACTGGTTGACAAGGGTGACA	59.084	20	GAAACAGAGTGAGCTCGGCT	60.038	20	115	21	135	ACTGGTTGACAAGGGTGACA	59.084	20	ACCGAAACAGAGTGAGCTCG	60.039	20	118	21	138
scaf_0000408_4	p3	(CAA)5	15	151	165	CCAGCAAACCATTGGAACCA	58.953	20	GTTTGCGGTGGGATCAGATC	58.983	20	216	62	277	GGAACCATGCAGCTAGATGC	59.05	20	GTTTGCGGTGGGATCAGATC	58.983	20	203	75	277	CCTCCGGTTAGCATGGAAGA	59.169	20	GTTTGCGGTGGGATCAGATC	58.983	20	251	27	277
scaf_0000410_7	p4	(AAAT)5	20	151	170	GTGCTGTGTCTTGATTGTGGT	59.05	21	ATGCATTTCACGGATCCACC	58.607	20	191	75	265	TGTGCTGTGTCTTGATTGTGG	59.051	21	ATGCATTTCACGGATCCACC	58.607	20	192	74	265	TGCTTGGCAAAAACAAGGAGA	58.893	21	ATGCATTTCACGGATCCACC	58.607	20	219	47	265
scaf_0000410_10	p4	(AAAT)5	20	151	170	ACACCTTTGTTGTGCTTGCT	58.815	20	ACACACTACGAAAAAGCGGT	58.056	20	181	72	252	ACTGGGTTGTGTTTCCACCT	59.371	20	ACACACTACGAAAAAGCGGT	58.056	20	201	52	252	AACTGGGTTGTGTTTCCACC	58.519	20	ACACACTACGAAAAAGCGGT	58.056	20	202	51	252
scaf_0000411_7	p4	(AAAT)5	20	151	170	CCATTTGGTGTTCCCCTCAA	57.992	20	CATGTGATAAAGTTGTGGGGAGT	58.665	23	185	87	271	CCATTTGGTGTTCCCCTCAA	57.992	20	TGTGATAAAGTTGTGGGGAGTT	57.553	22	183	87	269	CCATTTGGTGTTCCCCTCAA	57.992	20	TCATGTGATAAAGTTGTGGGGAG	58.411	23	186	87	272
scaf_0000411_13	p3	(TTG)5	15	279	293	TGATTGCAAACATGACGGGG	59.113	20	CCAGTCGGTTTGGACACTTC	58.773	20	148	52	199	TGATTGCAAACATGACGGGG	59.113	20	CAACACCAGTCGGTTTGGAC	59.339	20	153	52	204	GACGGGGCCAAAGTGAAAAA	59.252	20	CCAGTCGGTTTGGACACTTC	58.773	20	135	65	199
scaf_0000411_14	p3	(TTG)5	15	151	165	GAAGTGTCCAAACCGACTGG	58.773	20	GGAGTCCAGTGTTGTCCTCA	58.951	20	138	52	189	TTGGCTGAAGTGTCCAAACC	58.601	20	GGAGTCCAGTGTTGTCCTCA	58.951	20	144	46	189	GCTGAAGTGTCCAAACCGAC	59.413	20	GGAGTCCAGTGTTGTCCTCA	58.951	20	141	49	189
scaf_0000412_29	p3	(GAG)6	18	151	168	CGTATCGCAGAGTCGATCCT	59.131	20	TACAAAACCCCTCACTCCCC	58.93	20	112	8	119	TCGCAGAGTCGATCCTTGAA	58.826	20	TACAAAACCCCTCACTCCCC	58.93	20	108	12	119	GGGGAGTGAGGGGTTTTGTA	58.93	20	GCAGGGCCAACCAATAACTT	58.734	20	217	100	316
scaf_0000414_23	p3	(CCT)6	18	151	168	GCAAAACACAGCACTCTCCA	58.976	20	GTAAGGGAGGAGGAGGAGGA	59.065	20	161	14	174	CCAGCAAAACACAGCACTCT	58.973	20	GTAAGGGAGGAGGAGGAGGA	59.065	20	164	11	174	ACGGAACATCCCAGCAAAAC	59.041	20	GTAAGGGAGGAGGAGGAGGA	59.065	20	174	1	174
scaf_0000415_2	p3	(AAC)7	21	151	171	CACAATCACCAACAGCCCAA	58.961	20	CCAGTGAGCGTACATTGTTGT	58.857	21	106	81	186	CACAATCACCAACAGCCCAA	58.961	20	ACCAGTGAGCGTACATTGTTG	58.857	21	107	81	187	AACACAATCACCAACAGCCC	58.96	20	CCAGTGAGCGTACATTGTTGT	58.857	21	108	79	186
scaf_0000415_6	p3	(ATT)7	21	151	171	AGAACCCCAAAAATCCCACA	57.215	20	TTGTCCCGCCCCCAATATTA	58.776	20	202	110	311	TGCTCTTCACACCCTTTGAA	57.273	20	ACAAACTCAGCCCAAACTCG	58.691	20	248	22	269	TTGCTCTTCACACCCTTTGA	57.273	20	ACAAACTCAGCCCAAACTCG	58.691	20	249	21	269
scaf_0000416_24	p3	(TAA)5	15	151	165	CTCTAACCAATCTTGCTACGTCA	58.255	23	TGCATCATTTTGGCTCAAAGAG	57.817	22	197	50	246	TCTAACCAATCTTGCTACGTCA	57.206	22	TGCATCATTTTGGCTCAAAGAG	57.817	22	196	51	246	TCTCTAACCAATCTTGCTACGTC	58.005	23	TGCATCATTTTGGCTCAAAGAG	57.817	22	198	49	246
scaf_0000417_1	p3	(TTA)6	18	151	168	GTGTGTGGTCATCGCCAAAT	59.119	20	TGATGGGCTCACTTTGGAGT	58.933	20	235	12	246	GTGTGTGGTCATCGCCAAAT	59.119	20	TTGGTGTTTGATGGGCTCAC	58.673	20	243	12	254	GAAAGGTGTGTGGTCATCGC	59.483	20	TGATGGGCTCACTTTGGAGT	58.933	20	240	7	246
scaf_0000417_10	p4	(ATAC)5	20	151	170	AACACTTGGGCAAGAGGGTA	58.854	20	GACACTAGGACACGGCTACA	58.829	20	249	27	275	TAACACTTGGGCAAGAGGGT	58.854	20	GACACTAGGACACGGCTACA	58.829	20	250	26	275	AACACTTGGGCAAGAGGGTA	58.854	20	TCAAGGACACTAGGACACGG	58.746	20	254	27	280
scaf_0000417_11	p3	(CAT)6	18	151	168	CACACTGCCATGTCCTGTTC	59.123	20	CTGTAAGTCAGGGCATTGCG	59.271	20	236	49	284	CACACTGCCATGTCCTGTTC	59.123	20	AGCTGGCTGTCTGTAAGTCA	58.658	20	246	49	294	CACACTGCCATGTCCTGTTC	59.123	20	GGAGCTGGCTGTCTGTAAGT	59.389	20	248	49	296
scaf_0000417_17	p3	(AAT)7	21	151	171	CCAGAAAATCGAAAGGCGGT	58.835	20	CCTGCATTTGGTCGAGGATG	58.98	20	179	49	227	AGGCCAGAAAATCGAAAGGC	58.823	20	CCTGCATTTGGTCGAGGATG	58.98	20	182	46	227	AAACAGTGGGTGTGTGGTTG	58.818	20	CCTGCATTTGGTCGAGGATG	58.98	20	140	88	227
scaf_0000420_8	p3	(GGT)6	18	151	168	GTGGTGATAGCGGGTAGGTG	59.896	20	TCACCAACACCACTACCACC	59.529	20	106	127	232	GTGGTGATAGCGGGTAGGTG	59.896	20	GTCACCAACACCACTACCAC	58.41	20	107	127	233	GTAGCGAGTGGTGAGTGGTA	58.829	20	CTACCACCACCACCCACTC	59.322	19	108	180	287
scaf_0000420_9	p3	(GGT)8	24	151	174	TAGTAGCAAGTGGGTGGTGG	59.019	20	CACTTACTTGCCACCACCAC	59.048	20	155	138	292	AGTGGGTGGGTAAGTAACGG	59.021	20	CACTTACTTGCCACCACCAC	59.048	20	189	104	292	TAGTAGCAAGTGGGTGGTGG	59.019	20	ACTTACTTGCCACCACCACT	59.156	20	154	138	291
scaf_0000421_4	p3	(TCT)5	15	151	165	AACGTCGCTTTCAACCATCC	59.128	20	CCCCTTCCCTTCCTTTCCAT	58.989	20	184	67	250	CAGTAACCGCCACAATCGTT	58.847	20	CCCCTTCCCTTCCTTTCCAT	58.989	20	249	2	250	CGTCGCTTTCAACCATCCTC	59.278	20	CCCCTTCCCTTCCTTTCCAT	58.989	20	182	69	250
scaf_0000421_5	p3	(TTA)5	15	151	165	TGGAGCCAAGAGTTCACCTT	58.86	20	GCATGTGGCACCAAACTAAA	57.19	20	195	115	309	TGGAGCCAAGAGTTCACCTT	58.86	20	GCATGTGGCACCAAACTAAATG	59.005	22	195	115	309	AGGATTGTGGAGCCAAGAGT	58.634	20	GCATGTGGCACCAAACTAAA	57.19	20	202	108	309
scaf_0000423_4	p4	(AAAT)5	20	151	170	GGGCTCCCAAATTTAGGCTG	58.885	20	GGGCCTCATGTTCAATTGGG	59.174	20	118	88	205	TCCCAAATCCATGCACATGC	59.175	20	CAGCCTAAATTTGGGAGCCC	58.885	20	107	1	107	GGGCTCCCAAATTTAGGCTG	58.885	20	GCCTCATGTTCAATTGGGCT	58.811	20	116	88	203
scaf_0000425_2	p3	(TAA)5	15	151	165	TGAAGAAGGAAGAGGAGGGAG	58.174	21	TGAGACTCTGACCGGTATGA	57.199	20	149	166	314	TGAAGAAGGAAGAGGAGGGAG	58.174	21	TGAGACTCTGACCGGTATGAA	57.918	21	149	166	314	GAAGAAGGAAGAGGAGGGAGA	57.891	21	TGAGACTCTGACCGGTATGA	57.199	20	148	167	314
scaf_0000425_11	p3	(CAT)5	15	151	165	CCACCCCATTTGGTTTTCCC	59.31	20	ACCATGATGATGATGATGCTCA	57.633	22	106	62	167	ACCACCCCATTTGGTTTTCC	58.57	20	ACCATGATGATGATGATGCTCA	57.633	22	107	61	167	CACCCCATTTGGTTTTCCCT	58.272	20	ACCATGATGATGATGATGCTCA	57.633	22	105	63	167
scaf_0000426_13	p3	(AAG)8	24	151	174	CTAACATCCTTACCAGCGCG	58.791	20	GGACCACCAACCATCCCATA	59.077	20	177	116	292	CTAACATCCTTACCAGCGCG	58.791	20	GACACATGCATGCAGACACA	59.124	20	131	116	246	CTAACATCCTTACCAGCGCG	58.791	20	CAGACACATGCATGCAGACA	58.838	20	133	116	248
scaf_0000428_3	p4	(AATA)5	20	151	170	GAAATTGACTCTGAGCAGTCCA	58.332	22	TGACTGCAGCAAACAATCAGA	58.426	21	146	108	253	TGAAATTGACTCTGAGCAGTCC	58.332	22	TGACTGCAGCAAACAATCAGA	58.426	21	147	107	253	AAATTGACTCTGAGCAGTCCA	57.223	21	TGACTGCAGCAAACAATCAGA	58.426	21	145	109	253
scaf_0000428_21	p3	(ACC)5	15	151	165	TAGTTGTTGCAACCACCACC	58.605	20	AGAGGAAAGGTAGGGCTTGG	58.71	20	142	139	280	CCACACCCATTCTAGCCCTA	58.493	20	AGAGGAAAGGTAGGGCTTGG	58.71	20	101	180	280	AACCACACCCATTCTAGCCC	59.668	20	AGAGGAAAGGTAGGGCTTGG	58.71	20	103	178	280
scaf_0000431_11	p3	(AAT)6	18	151	168	GCACCAAAGAGATTCTTCACTCA	58.932	23	AGCATAGATGGAGAAGGATGGA	58.133	22	110	194	303	AGCACCAAAGAGATTCTTCACTC	58.677	23	AGCATAGATGGAGAAGGATGGA	58.133	22	111	193	303	AGCACCAAAGAGATTCTTCACT	57.636	22	AGCATAGATGGAGAAGGATGGA	58.133	22	111	193	303
scaf_0000432_3	p3	(CAC)6	18	151	168	CTTGCATAGCTTCCACCGTC	58.99	20	CTCATATCGTCGTCGTCCGA	59.143	20	104	109	212	CTTGCATAGCTTCCACCGTC	58.99	20	TCTCATATCGTCGTCGTCCG	59.143	20	105	109	213	CTTGCATAGCTTCCACCGTC	58.99	20	GTGGTTGTAGTAGCGGAGGA	58.82	20	179	109	287
scaf_0000433_4	p3	(ATT)11	33	151	183	ACATGTGCGACTAAGGAGCT	59.102	20	GACTAAACCCCTCCGAGGAG	58.887	20	261	21	281	ACATGTGCGACTAAGGAGCT	59.102	20	GAGACTAAACCCCTCCGAGG	58.887	20	263	21	283	ACATGTGCGACTAAGGAGCT	59.102	20	GGAGACTAAACCCCTCCGAG	58.887	20	264	21	284
scaf_0000436_8	p4	(TAAA)5	20	151	170	TGGGCCAAACTAGTTCCCAA	59.146	20	ATGAAACCCAGTCTAGGCCC	59.08	20	103	192	294	TTGGGCCAAACTAGTTCCCA	59.146	20	AACCCAGTCTAGGCCCAATC	59.08	20	100	191	290	TTGGGCCAAACTAGTTCCCA	59.146	20	ATGAAACCCAGTCTAGGCCC	59.08	20	104	191	294
scaf_0000437_6	p3	(ATA)7	21	151	171	TTGCTATACGTGCTAAGGATGT	57.334	22	AGTGGCCCAATCCATCTCTC	59.157	20	132	183	314	ACATTGCTATACGTGCTAAGGA	57.334	22	AGTGGCCCAATCCATCTCTC	59.157	20	135	180	314	TTGCTATACGTGCTAAGGATGT	57.334	22	CCCAATCCATCTCTCCAGCA	59.158	20	127	183	309
scaf_0000437_12	p3	(CTT)11	33	151	183	TGGAAACGCTTACTGCATCA	57.823	20	TTGCACTGAGCTGCCTTTTT	58.886	20	246	79	324	TGGAAACGCTTACTGCATCA	57.823	20	TTTGCACTGAGCTGCCTTTT	58.886	20	247	79	325	TGGAAACGCTTACTGCATCA	57.823	20	TTTTGCACTGAGCTGCCTTT	58.886	20	248	79	326
scaf_0000437_13	p3	(CTT)11	33	6	38	TGCCATAGTAGTGGGTGTGG	59.091	20	GGCTGTCTTTATTTAGTCGGAAC	57.534	23	126	188	313	AAAGGCAGCTCAGTGCAAAA	58.886	20	GGCTGTCTTTATTTAGTCGGAAC	57.534	23	152	162	313	AAAAGGCAGCTCAGTGCAAA	58.886	20	GGCTGTCTTTATTTAGTCGGAAC	57.534	23	153	161	313
scaf_0000440_1	p3	(TAA)6	18	151	168	CTTTGACCGGGACTTTTGGT	58.312	20	AGTGCGATATGAGTCTCACTC	57.019	21	155	131	285	ACTTTGACCGGGACTTTTGG	58.312	20	AGTGCGATATGAGTCTCACTC	57.019	21	156	130	285	CTTTGACCGGGACTTTTGGT	58.312	20	AAGTGCGATATGAGTCTCACTC	57.7	22	156	131	286
scaf_0000440_8	p3	(TTC)8	24	151	174	TGCCGATTTTTCGAAAATGGG	58.047	21	CGACCCCAAGTGTTTCACAG	59.056	20	278	45	322	GCCGATTTTTCGAAAATGGGT	58.046	21	CGACCCCAAGTGTTTCACAG	59.056	20	277	46	322	TGCCGATTTTTCGAAAATGGG	58.047	21	CCCAAGTGTTTCACAGTGCA	58.898	20	274	45	318
scaf_0000446_13	p4	(AAAT)5	20	151	170	TACACAACGGTCGTCTTCCA	58.969	20	TGAGTTAAGGTGGTTGGGGG	59.225	20	187	45	231	TACACAACGGTCGTCTTCCA	58.969	20	CCCTGTTTGTTGGGCATGTT	59.242	20	164	45	208	CCGCATCTCATACACAACGG	59.07	20	TGAGTTAAGGTGGTTGGGGG	59.225	20	197	35	231
scaf_0000446_23	p3	(ATT)5	15	151	165	CGTCCTCACGTCAATCATGG	58.719	20	ATCTCCTAACCAAACACAGTGT	57.293	22	274	28	301	CGTCCTCACGTCAATCATGG	58.719	20	CCAAATCTCCTAACCAAACACAG	57.623	23	278	28	305	ACGTCAATCATGGATGCTCC	58.041	20	ATCTCCTAACCAAACACAGTGT	57.293	22	267	35	301
scaf_0000446_26	p4	(ATTT)5	20	151	170	AGGACATCCTAAACCACCCT	57.639	20	AGAATGCTATGCTAGTTGCCA	57.434	21	105	92	196	AGGACATCCTAAACCACCCTT	58.356	21	AGAATGCTATGCTAGTTGCCA	57.434	21	105	92	196	AGGACATCCTAAACCACCCT	57.639	20	AGAATGCTATGCTAGTTGCCAA	58.11	22	105	92	196
scaf_0000448_15	p3	(AAC)5	15	151	165	ACAACACGCACAACTCCATC	59.056	20	CCAGAGTGTTGTTTTGGCCA	58.89	20	101	201	301	ATCACAACACGCACAACTCC	59.056	20	CCAGAGTGTTGTTTTGGCCA	58.89	20	104	198	301	CAACACGCACAACTCCATCA	59.056	20	CCAGAGTGTTGTTTTGGCCA	58.89	20	100	202	301
scaf_0000449_4	p3	(AAC)5	15	151	165	TCCCTGAAATTGGACAACGC	58.756	20	GAAGGAGGTGGTCGTAGAGG	58.895	20	113	105	217	CCGAACAACCACCTGTCCTA	59.317	20	GAAGGAGGTGGTCGTAGAGG	58.895	20	197	21	217	CCGAACAACCACCTGTCCTA	59.317	20	GAGGGTGGTTTGTGATGCTG	59.116	20	181	21	201
scaf_0000450_9	p3	(ATC)5	15	151	165	AGTGGCCCACATCAAGCTAT	59.078	20	CGCAACACTCTTGATCCCAG	58.918	20	138	132	269	TGGCCCACATCAAGCTATCA	59.082	20	CGCAACACTCTTGATCCCAG	58.918	20	136	134	269	AGTGGCCCACATCAAGCTAT	59.078	20	ATGCGCAACACTCTTGATCC	58.91	20	141	132	272
scaf_0000450_11	p3	(AAG)5	15	151	165	CGAATCACCTAGCAGCAACC	58.99	20	GTCTCTTCCTTTGGGCTCCT	59.012	20	137	94	230	ACCCAGCAACCAACAAACAG	59.177	20	GTCTCTTCCTTTGGGCTCCT	59.012	20	203	28	230	TCACCCAGCAACCAACAAAC	59.179	20	GTCTCTTCCTTTGGGCTCCT	59.012	20	205	26	230
scaf_0000451_2	p3	(TCT)5	15	151	165	TCCATGGGCTCATCAATGGA	58.776	20	TGTACTATCGAGCTTGACAGTGA	58.992	23	111	129	239	TCCATGGGCTCATCAATGGA	58.776	20	TCGAGCTTGACAGTGATAAGAGA	58.99	23	104	129	232	TCCATGGGCTCATCAATGGA	58.776	20	TCAATAGATCCGTGGTACGAAGA	58.798	23	169	129	297
scaf_0000454_1	p3	(GTG)6	18	151	168	TGCTCTCCTCATATGCCCTG	58.946	20	GCTCAAGGTGGGTTCACTTG	59.046	20	192	64	255	TTAGTGGCTCTGAGTCTGCC	59.102	20	GCTCAAGGTGGGTTCACTTG	59.046	20	252	4	255	AGTTAAGTGGTGGTGGTGGT	58.781	20	GCTCAAGGTGGGTTCACTTG	59.046	20	112	144	255
scaf_0000457_3	p3	(AAG)6	18	151	168	ACTTTTGCTTCTGGTCCCAT	57.317	20	CCAAACCCGTCCCTAGAAGT	59.018	20	112	14	125	ACTTCTAGGGACGGGTTTGG	59.018	20	ACCAACTTCCCAAATCACCA	57.234	20	163	106	268	ACTTTTGCTTCTGGTCCCAT	57.317	20	TTTGTCATGACCCAAACCCG	58.677	20	123	14	136
scaf_0000457_14	p3	(AAT)10	30	151	180	CTCGAGCTTTAGTTGGCACC	58.92	20	GCGATGGAGTGGCAGTAGTA	59.255	20	203	52	254	TTGCTCGAGCTTTAGTTGGC	58.843	20	GCGATGGAGTGGCAGTAGTA	59.255	20	206	49	254	CGCACAAACTGATCCAGACA	58.488	20	GCGATGGAGTGGCAGTAGTA	59.255	20	137	118	254
scaf_0000457_22	p4	(AATT)6	24	151	174	TAGCGAGTGGTGGCACAATA	59.101	20	GTGGACAAAGCTTAGCTCGT	58.203	20	269	34	302	AGGAGATTAGCGAGTGGTGG	58.885	20	GTGGACAAAGCTTAGCTCGT	58.203	20	276	27	302	TAGCGAGTGGTGGCACAATA	59.101	20	AGTGGACAAAGCTTAGCTCG	57.914	20	270	34	303
scaf_0000460_7	p3	(TCT)10	30	151	180	CTTCGTGGGCTTTGTTAGGG	58.835	20	TCTTCCTCTCCCTCCCCAAA	59.504	20	124	178	301	CTTCGTGGGCTTTGTTAGGG	58.835	20	TTCTTCCTCTCCCTCCCCAA	59.504	20	125	178	302	CTTCGTGGGCTTTGTTAGGG	58.835	20	TTTCTTCCTCTCCCTCCCCA	59.504	20	126	178	303
scaf_0000460_11	p3	(TCT)5	15	151	165	CACTCCGTCTCCATGCATTG	58.988	20	TACACTAGTCCAACCAGCCC	58.727	20	132	60	191	CCGGCATACAATTCGCATGA	59.056	20	TACACTAGTCCAACCAGCCC	58.727	20	167	25	191	ACCGGCATACAATTCGCATG	59.337	20	TACACTAGTCCAACCAGCCC	58.727	20	168	24	191
scaf_0000461_2	p3	(TTA)10	30	151	180	TCCCCTACGGTTTCTTAGCA	58.059	20	GTTCTGGAGCCATCCTTTGG	58.532	20	139	73	211	TCCCCTACGGTTTCTTAGCA	58.059	20	GAGAGTTCTGGAGCCATCCT	58.505	20	143	73	215	TCCCCTACGGTTTCTTAGCA	58.059	20	AGAGAGTTCTGGAGCCATCC	58.505	20	144	73	216
scaf_0000464_7	p3	(CAG)5	15	151	165	GCCTGGGTTAGTAGGTGCAA	59.673	20	AGGGCTAGAACCAGAGCAAG	59.092	20	140	4	143	GCCTGGGTTAGTAGGTGCAA	59.673	20	GGGCTAGAACCAGAGCAAGA	59.095	20	139	4	142	GCCTGGGTTAGTAGGTGCAA	59.673	20	CAAGAACCAAGGAGCAGCTG	59.12	20	124	4	127
scaf_0000466_19	p3	(TTC)5	15	279	293	TGGACAACAGAGTTGCAAGA	57.292	20	AGGTGCATTGGAAGAAGAAGA	57.204	21	107	196	302	TGGACAACAGAGTTGCAAGA	57.292	20	GGTGCATTGGAAGAAGAAGAAGA	58.925	23	106	196	301	TGGACAACAGAGTTGCAAGA	57.292	20	AGGTGCATTGGAAGAAGAAGAAG	58.922	23	107	196	302
scaf_0000466_20	p3	(TTC)5	15	151	165	GAAGAGAGCCAACCAAAGCC	59.115	20	TGGCCATGGGAGAAAGATCA	58.702	20	175	98	272	GGAAGAGAGCCAACCAAAGC	59.115	20	TGGCCATGGGAGAAAGATCA	58.702	20	176	97	272	GAGAGCCAACCAAAGCCAAG	59.4	20	TGGCCATGGGAGAAAGATCA	58.702	20	172	101	272
scaf_0000466_21	p3	(TTC)5	15	24	38	TCTTCTTCTTCCAATGCACCT	57.204	21	TGGCCATGGGAGAAAGATCA	58.702	20	119	27	145	TCTTCTTCTTCTTCCAATGCACC	58.925	23	TGGCCATGGGAGAAAGATCA	58.702	20	122	24	145	CTTCTTCTTCTTCCAATGCACCT	58.922	23	TGGCCATGGGAGAAAGATCA	58.702	20	121	25	145
scaf_0000471_3	p4	(GGCT)5	20	151	170	ATGTTTTCCAAGGCTGGCTG	59.029	20	ACAGTTTTGGATCGGGGGAT	59	20	154	139	292	CATGTTTTCCAAGGCTGGCT	59.029	20	ACAGTTTTGGATCGGGGGAT	59	20	155	138	292	ATGTTTTCCAAGGCTGGCTG	59.029	20	GGGGGATGAGGATCGAGTTT	58.868	20	141	139	279
scaf_0000471_9	p3	(AAT)7	21	151	171	TCAAGGGCAAAAGAAACGGA	57.94	20	TGCCACCTTTTAGCCTTTGT	57.919	20	234	85	318	TCAAGGGCAAAAGAAACGGA	57.94	20	TGTGCCACCTTTTAGCCTTT	57.919	20	236	85	320	GTCAAGGGCAAAAGAAACGG	57.866	20	TGCCACCTTTTAGCCTTTGT	57.919	20	235	84	318
scaf_0000471_16	p4	(ATTT)5	20	151	170	GCACACATCTCTGTTGGTGT	58.402	20	TGATGTGCACACTTGACAAGT	58.358	21	181	40	220	CCCCTGCACAACTACCTCAA	59.6	20	TGATGTGCACACTTGACAAGT	58.358	21	128	93	220	AGCACACATCTCTGTTGGTG	58.112	20	TGATGTGCACACTTGACAAGT	58.358	21	182	39	220
scaf_0000471_20	p4	(AAAT)5	20	151	170	TAGGACCCCTGGAACCCTTA	58.896	20	TGATGCAAAGGGATTTGGCA	58.358	20	126	94	219	CCACCCTGCCCAAAACATAG	58.815	20	TGATGCAAAGGGATTTGGCA	58.358	20	186	34	219	TATTGACCACCCTGCCCAAA	59.219	20	TGATGCAAAGGGATTTGGCA	58.358	20	192	28	219
scaf_0000472_1	p3	(GTT)5	15	151	165	TTTGGTGAGAGTCGACCGAA	58.966	20	GTCCAATATTTCGGGGCCAC	58.97	20	246	29	274	TTTGGTGAGAGTCGACCGAA	58.966	20	AATATTTCGGGGCCACATGC	58.96	20	242	29	270	TTTGGTGAGAGTCGACCGAA	58.966	20	ATGCACTCCCGAACAACAAC	59.048	20	226	29	254
scaf_0000472_6	p3	(AAT)5	15	151	165	ACCTCTATCCTCCTCTCCCA	58.072	20	AGAGAGGTGGGTTGTGATGG	59.013	20	103	175	277	ACCTCTATCCTCCTCTCCCA	58.072	20	GGCAAAAGAGAGGTGGGTTG	59.038	20	109	175	283	ACCTCTATCCTCCTCTCCCA	58.072	20	GAGAGGTGGGTTGTGATGGT	59.307	20	102	175	276
scaf_0000476_1	p4	(ATCC)9	36	151	186	AAAGCAACCGATCGAGATCA	57.327	20	TGGATGGATGGATGGATGGA	57.863	20	103	76	178	AAAGCAACCGATCGAGATCA	57.327	20	TGGATGGATGGATGGATGGA	57.863	20	107	76	182	AAAGCAACCGATCGAGATCA	57.327	20	TGGATGGATGGATGGATGGA	57.863	20	111	76	186
scaf_0000477_11	p3	(GGT)6	18	151	168	AGCTAGGAAAGGGCAAGAGG	59.085	20	AGCATTCCGGCGAATTTCTC	58.983	20	143	129	271	GCTAGGAAAGGGCAAGAGGA	59.088	20	AGCATTCCGGCGAATTTCTC	58.983	20	142	130	271	AGCTAGGAAAGGGCAAGAGG	59.085	20	ACTAGCAGCTTCTTCTCCGG	59.179	20	166	129	294
scaf_0000477_19	p3	(TCA)5	15	151	165	TGGAATTATCGACCACCAACA	57.295	21	TGGTGATGGTGCATGTTTGT	58.298	20	220	1	220	TGGAATTATCGACCACCAACAA	57.978	22	TGGTGATGGTGCATGTTTGT	58.298	20	220	1	220	TTGGAATTATCGACCACCAACA	57.978	22	TGGTGATGGTGCATGTTTGT	58.298	20	221	0	220
scaf_0000478_6	p3	(AAT)6	18	285	302	CATTTACCAGTGACCTTAAGCTC	57.197	23	TGGCAGTCACTATATGCACAT	57.156	21	104	125	228	CATTTACCAGTGACCTTAAGCTC	57.197	23	ATGGCAGTCACTATATGCACA	57.156	21	105	125	229	CATTTACCAGTGACCTTAAGCTC	57.197	23	AATGGCAGTCACTATATGCACA	57.845	22	106	125	230
scaf_0000478_7	p3	(AAT)6	18	151	168	CTTGAGAGGTAGGCTTGGCT	59.092	20	TCCAGGGCGTGACATGTTAA	59.312	20	121	197	317	CTTGAGAGGTAGGCTTGGCT	59.092	20	CCAGGGCGTGACATGTTAAA	58.471	20	120	197	316	ACTTGAGAGGTAGGCTTGGC	59.384	20	TCCAGGGCGTGACATGTTAA	59.312	20	122	196	317
scaf_0000479_1	p3	(ATG)5	15	151	165	AGGCAACATTGGGCATAACG	59.183	20	AGGAGATCATCAGAACTAAGGCT	58.444	23	120	109	228	GGCAACATTGGGCATAACGA	59.186	20	AGGAGATCATCAGAACTAAGGCT	58.444	23	119	110	228	AGGCAACATTGGGCATAACG	59.183	20	GGAGATCATCAGAACTAAGGCT	57.046	22	119	109	227
scaf_0000479_3	p3	(ATT)8	24	151	174	GCAGGGAGGGTCGTAGAAAA	59.388	20	TAACTAGTCGGTGTCCCAGC	58.82	20	135	0	134	GCTGGGACACCGACTAGTTA	58.82	20	CGCTATCTCTCTGGTGCCAA	59.538	20	195	115	309	GCTGGGACACCGACTAGTTA	58.82	20	GCTATCTCTCTGGTGCCAAC	58.053	20	194	115	308
scaf_0000480_17	p3	(GAA)7	21	151	171	TGCCCTAGCTACACGCAATA	58.884	20	TGTGGGATTATGGAAGAGGGT	58.141	21	224	63	286	TGCCCTAGCTACACGCAATA	58.884	20	TGGGATTATGGAAGAGGGTCA	57.856	21	222	63	284	TGCCCTAGCTACACGCAATA	58.884	20	GTGGGATTATGGAAGAGGGTCA	59.222	22	223	63	285
scaf_0000481_29	p3	(TTG)8	24	151	174	CCTGGTAGTGGCCTAGTGG	58.788	19	TGCTACGTTAGGATGTCTGTCA	58.914	22	276	31	306	CCCTGGTAGTGGCCTAGTG	58.788	19	TGCTACGTTAGGATGTCTGTCA	58.914	22	277	30	306	CCTGGTAGTGGCCTAGTGG	58.788	19	GCTACGTTAGGATGTCTGTCA	57.223	21	275	31	305
scaf_0000482_2	p3	(AAC)5	15	151	165	TGACGTAATCTGGACGAGCA	58.83	20	GGGTCCAATGCCACAAACAA	59.244	20	113	110	222	ATCTGGACGAGCAGAAGGTC	59.179	20	GGGTCCAATGCCACAAACAA	59.244	20	106	117	222	AATCTGGACGAGCAGAAGGT	58.729	20	GGGTCCAATGCCACAAACAA	59.244	20	107	116	222
scaf_0000482_17	p3	(GTG)5	15	151	165	GTGGTGGTAGTAGCGATGGT	59.178	20	ACCACCATCACCATCACCAT	58.998	20	108	174	281	GTGGTGGTGGTAGTAGCGAT	59.178	20	ACCACCATCACCATCACCAT	58.998	20	111	171	281	TGGTGGTGGTAGTAGCGATG	59.178	20	ACCACCATCACCATCACCAT	58.998	20	110	172	281
scaf_0000482_17	p3	(TGG)6	18	276	293	GTGGTGGTAGTAGCGATGGT	59.178	20	ACCACCATCACCATCACCAT	58.998	20	108	174	281	GTGGTGGTGGTAGTAGCGAT	59.178	20	ACCACCATCACCATCACCAT	58.998	20	111	171	281	TGGTGGTGGTAGTAGCGATG	59.178	20	ACCACCATCACCATCACCAT	58.998	20	110	172	281
scaf_0000482_18	p3	(GTG)5	15	26	40	ATGGTGATGGTGATGGTGGT	58.998	20	TCCACCACCACTACCATCAC	59.019	20	124	137	260	ATGGTGATGGTGATGGTGGT	58.998	20	ACTTCTATGCCACCTCCACC	59.088	20	138	137	274	ATGGTGATGGTGATGGTGGT	58.998	20	ACCACTTCTATGCCACCTCC	59.088	20	141	137	277
scaf_0000482_18	p3	(TGG)6	18	151	168	ATGGTGATGGTGATGGTGGT	58.998	20	TCCACCACCACTACCATCAC	59.019	20	124	137	260	ATGGTGATGGTGATGGTGGT	58.998	20	ACTTCTATGCCACCTCCACC	59.088	20	138	137	274	ATGGTGATGGTGATGGTGGT	58.998	20	ACCACTTCTATGCCACCTCC	59.088	20	141	137	277
scaf_0000482_19	p3	(TGG)5	15	151	165	CCTGGTGGTGGTGGTAGTAG	59.097	20	TATCATGCCACCGCCACTAT	58.944	20	153	43	195	AGTAGCGATGGTGGTGGTAG	58.888	20	TATCATGCCACCGCCACTAT	58.944	20	185	11	195	AGTAGTAGCGATGGTGGTGG	58.888	20	TATCATGCCACCGCCACTAT	58.944	20	188	8	195
scaf_0000485_1	p4	(TTAT)5	20	151	170	AGCCGTATATCAGTAAGCCCA	58.395	21	AAACCAACATCACTTGGCCA	58.213	20	100	204	303	AGCCGTATATCAGTAAGCCCA	58.395	21	AGAAACCAACATCACTTGGCC	59.036	21	102	204	305	TAGCCGTATATCAGTAAGCCCA	58.23	22	AACCAACATCACTTGGCCAC	58.96	20	100	203	302
scaf_0000485_14	p3	(TAA)10	30	151	180	TGTGTGCCAACCATCTTTGA	57.936	20	AAGCTCCGTCCATGGACAAA	59.6	20	217	81	297	TGTGTGCCAACCATCTTTGA	57.936	20	AAAGCTCCGTCCATGGACAA	59.6	20	218	81	298	GAGATGTGTGCCAACCATCT	57.88	20	AAGCTCCGTCCATGGACAAA	59.6	20	221	77	297
scaf_0000486_16	p3	(AGA)5	15	151	165	GGAGGAAGGCGGAGGAAAAA	59.962	20	ACATGCTGCCACTTCTTTCT	57.717	20	180	2	181	GGAGGAAGGCGGAGGAAAAA	59.962	20	ACATGCTGCCACTTCTTTCTT	58.409	21	180	2	181	GGAGGAAGGCGGAGGAAAAA	59.962	20	AACATGCTGCCACTTCTTTCT	58.409	21	181	2	182
scaf_0000487_3	p3	(ATA)9	27	151	177	TCTGACAAATGGCATGGTCA	57.417	20	TCTTTTCCATGACCAGGGGG	59.296	20	101	205	305	TTCTGACAAATGGCATGGTCA	58.126	21	TCTTTTCCATGACCAGGGGG	59.296	20	102	204	305	AGTTCTGACAAATGGCATGGT	58.12	21	TCTTTTCCATGACCAGGGGG	59.296	20	104	202	305
scaf_0000487_9	p4	(GATG)6	24	151	174	ACCGTAAGATGGATGGATGGA	58.31	21	TCTTTGGTGGGGCAAACATC	58.663	20	100	143	242	ACCGTAAGATGGATGGATGGA	58.31	21	GATCTTTGGTGGGGCAAACA	58.663	20	102	143	244	ACCGTAAGATGGATGGATGGA	58.31	21	GGATCTTTGGTGGGGCAAAC	59.392	20	103	143	245
scaf_0000487_16	p3	(AGA)5	15	151	165	GAATCCTGAAGGGTCCCACA	59.008	20	GAGCGAAGAGAGGATCGTCA	58.982	20	212	1	212	GAATCCTGAAGGGTCCCACA	59.008	20	AAGGAGCGAAGAGAGGATCG	58.971	20	215	1	215	GAATCCTGAAGGGTCCCACA	59.008	20	TCAATGGCAGTCACGTCTCT	59.031	20	181	1	181
scaf_0000489_14	p3	(CCA)6	18	151	168	GCTCCATTTGTTCAGCCGAA	59.119	20	GGTGGTGGTGGGATTGGTAA	59.594	20	146	15	160	ATGCTCCATTTGTTCAGCCG	59.187	20	GGTGGTGGTGGGATTGGTAA	59.594	20	148	13	160	GCTCCATTTGTTCAGCCGAA	59.119	20	TGGTGGTGGGATTGGTAAGA	58.251	20	144	15	158
scaf_0000489_16	p4	(AAAT)6	24	151	174	CCAACCAATCGGCCATTTCA	59.106	20	TTCTGCTCCAATTGTGTACCT	57.212	21	124	77	200	GGTCCAGGATAACCTCCCAC	59.162	20	TTCTGCTCCAATTGTGTACCT	57.212	21	147	54	200	GTGGTCCAGGATAACCTCCC	59.162	20	TTCTGCTCCAATTGTGTACCT	57.212	21	149	52	200
scaf_0000489_24	p4	(ATTT)5	20	151	170	AACCCACATCTCACAGGCTT	59.226	20	ACATCACATCAATTTGTCCCCA	58.223	22	107	6	112	ACCAACCCACATCTCACAGG	59.598	20	TCAATTTGTCCCCAATACCGT	57.557	21	102	3	104	AACCCACATCTCACAGGCTT	59.226	20	ATCAATTTGTCCCCAATACCGT	58.024	22	100	6	105
scaf_0000489_30	p3	(GTG)5	15	151	165	TGAAAGTGGTGAGTGGTGGT	59.084	20	ACCACTCCTTCACCATAGCC	59.088	20	110	138	247	TGAAAGTGGTGAGTGGTGGT	59.084	20	CCACTCCTTCACCATAGCCT	58.792	20	109	138	246	TGAAAGTGGTGAGTGGTGGT	59.084	20	ACCCCACCATCTCTCTTTCC	58.71	20	131	138	268
scaf_0000490_13	p3	(ACC)5	15	151	165	ATGCTCAACCCTAACCACCA	58.928	20	AGTAGTGGTGATGGTGGTGG	59.016	20	139	38	176	ATGCTCAACCCTAACCACCA	58.928	20	ATGGTGGTGGTGGTGGTTAT	58.919	20	129	38	166	ATGCTCAACCCTAACCACCA	58.928	20	AGCGGTAGTAGTGGTGATGG	58.888	20	145	38	182
scaf_0000490_20	p3	(TTG)6	18	1	18	AGTCCATCATTCTAATCCACCCA	58.953	23	TGTGATTGTGGCATTTGAGAGT	58.511	22	126	20	145	AGTCCATCATTCTAATCCACCCA	58.953	23	TGTGGATGTTAACCCATGTGA	57.202	21	193	20	212	GTCCATCATTCTAATCCACCCA	57.562	22	TGTGATTGTGGCATTTGAGAGT	58.511	22	125	21	145
scaf_0000490_23	p3	(ATC)5	15	151	165	ACCAAAGCACCAAAAGCCTT	58.797	20	ACCACACCAAGAGAAACCCT	58.777	20	106	104	209	AACCAAAGCACCAAAAGCCT	58.797	20	ACCACACCAAGAGAAACCCT	58.777	20	107	103	209	ACCAAAGCACCAAAAGCCTT	58.797	20	CTCCAACCTCTACCACACCA	58.652	20	117	104	220
scaf_0000491_24	p3	(ACC)5	15	151	165	CACCGACAAAGGCCAAGAAA	58.971	20	TTTCTAGGTCGTCGATGGGG	58.891	20	126	130	255	AAGCTACGCTTCGAAGACCT	59.111	20	CAGAAGAGTCGTCTTTGGCG	58.936	20	107	101	207	CTCAGCTGTGGTCTTCGAGA	59.115	20	CAGAAGAGTCGTCTTTGGCG	58.936	20	126	82	207
scaf_0000491_30	p4	(AATA)5	20	151	170	CTGCACATTGTTAACGGGGT	58.756	20	AGAAGATGGGTTGATCTGCCT	58.796	21	240	33	272	TCTGCACATTGTTAACGGGG	58.471	20	AGAAGATGGGTTGATCTGCCT	58.796	21	241	32	272	CCCACTGTTCATTCTGCACA	58.392	20	AGAAGATGGGTTGATCTGCCT	58.796	21	253	20	272
scaf_0000492_6	p3	(AAG)5	15	151	165	ACTTCAAGCCCCCACACTTA	58.854	20	GTGTTCACGAGAAGCCATGG	59.201	20	166	94	259	ACTTCAAGCCCCCACACTTA	58.854	20	GGTGTTCACGAGAAGCCATG	59.201	20	167	94	260	TACTTCAAGCCCCCACACTT	58.854	20	GTGTTCACGAGAAGCCATGG	59.201	20	167	93	259
scaf_0000493_1	p4	(TTTA)5	20	151	170	AAGGCGGTGCTTTGCTTTTA	58.963	20	GACACCCACTAGCGCTCTAA	59.184	20	167	134	300	ACAGATCATGGTCCCACAGG	59.085	20	GACACCCACTAGCGCTCTAA	59.184	20	205	96	300	CAGATCATGGTCCCACAGGA	58.793	20	GACACCCACTAGCGCTCTAA	59.184	20	204	97	300
scaf_0000494_9	p3	(TCT)7	21	151	171	TGGATGTCGTGTAGATGTCCT	58.265	21	CCCTAGATGTGCCAATCAATCA	58.176	22	248	33	280	TGGATGTCGTGTAGATGTCCT	58.265	21	TCCCTAGATGTGCCAATCAATC	57.909	22	249	33	281	TCTGGACTAGGTTATGCATGCT	58.959	22	CCCTAGATGTGCCAATCAATCA	58.176	22	211	70	280
scaf_0000496_3	p3	(AAT)9	27	151	177	ACCCTTAGCCTTGCGTACTT	59.018	20	ACCGCACCATTACAATCCAA	57.792	20	268	54	321	ACCCTTAGCCTTGCGTACTT	59.018	20	AACCGCACCATTACAATCCA	57.792	20	269	54	322	TTACACCCTTAGCCTTGCGT	59.312	20	ACCGCACCATTACAATCCAA	57.792	20	272	50	321
scaf_0000496_25	p3	(TTC)5	15	462	476	AATTGCAAGGACCAAACCCT	57.898	20	ACACACACACACACACACAC	59.128	20	169	15	183	AATTGCAAGGACCAAACCCT	57.898	20	ACACACACACACACACACAC	59.128	20	171	15	185	AATTGCAAGGACCAAACCCT	57.898	20	ACACACACACACACACACAC	59.128	20	173	15	187
scaf_0000497_1	p4	(AAAT)5	20	151	170	CGATGCTCGAGACCAAAGGT	60.109	20	ACGTCAATATGGCTGATCCCA	59.232	21	241	1	241	ACGATGCTCGAGACCAAAGG	60.109	20	ACGTCAATATGGCTGATCCCA	59.232	21	242	0	241	TGGACCCTCATCAGTAGAAGC	58.889	21	ACGTCAATATGGCTGATCCCA	59.232	21	191	51	241
scaf_0000498_1	p3	(TAT)7	21	151	171	GGGAGTTTCAGATTCCCCTCA	59.084	21	AGAAGTGTCGGTTTCCACCA	59.165	20	227	92	318	GGGAGTTTCAGATTCCCCTCA	59.084	21	GAAGTGTCGGTTTCCACCAA	58.329	20	226	92	317	GGGAGTTTCAGATTCCCCTC	57.28	20	AGAAGTGTCGGTTTCCACCA	59.165	20	227	92	318
scaf_0000498_2	p4	(AAAT)5	20	151	170	CAATCCCCACCAAACCAACC	59.315	20	AAGCCATGGAAGACGAGTGA	59.023	20	206	114	319	CAATCCCCACCAAACCAACC	59.315	20	AGCCATGGAAGACGAGTGAT	58.801	20	205	114	318	TTGTTTGCCACTAACTGCGG	59.334	20	GGTTGGTTTGGTGGGGATTG	59.315	20	127	7	133
scaf_0000498_13	p3	(ATT)5	15	151	165	AGGGTCCAATGGAGGGTTTT	58.833	20	GCTCAAATTTTCGGGGTCCA	58.747	20	119	124	242	AGGGTCCAATGGAGGGTTTT	58.833	20	TGCTCAAATTTTCGGGGTCC	58.747	20	120	124	243	AAGGGTCCAATGGAGGGTTT	58.833	20	GCTCAAATTTTCGGGGTCCA	58.747	20	120	123	242
scaf_0000506_10	p3	(AAT)7	21	151	171	TGTGATTGAATACAAGTCGGCA	58.33	22	TGGCAAAATGGATAGTGGGC	58.516	20	111	3	113	TGTGATTGAATACAAGTCGGCA	58.33	22	GGCAAAATGGATAGTGGGCT	58.219	20	110	3	112	TGTGATTGAATACAAGTCGGCA	58.33	22	TTGGCAAAATGGATAGTGGGC	59.17	21	112	3	114
scaf_0000508_20	p4	(TTGA)5	20	151	170	TGTAGGGCTAAATTGGAGGCA	59.08	21	GTTGCTGATTTCCAAGAGGCA	59.111	21	177	91	267	TGTAGGGCTAAATTGGAGGCA	59.08	21	TGCTGATTTCCAAGAGGCAAG	58.835	21	175	91	265	TGTAGGGCTAAATTGGAGGCA	59.08	21	AGTTGCTGATTTCCAAGAGGC	58.834	21	178	91	268
scaf_0000508_23	p4	(TTTA)5	20	151	170	CTGGAGAAATGCATGCGTGT	59.193	20	GGCACCATAAGAAGAAGCCA	57.871	20	110	21	130	CTGGAGAAATGCATGCGTGT	59.193	20	TGGCACCATAAGAAGAAGCC	57.871	20	111	21	131	ACTGGAGAAATGCATGCGTG	59.193	20	GGCACCATAAGAAGAAGCCA	57.871	20	111	20	130
scaf_0000509_24	p4	(AAAT)5	20	151	170	GCCAATTGTGCTGAAGAACC	57.93	20	TCACAAGTCGCCAAGGGATA	58.728	20	121	1	121	GGCCAATTGTGCTGAAGAAC	57.93	20	TCACAAGTCGCCAAGGGATA	58.728	20	122	0	121	GCCAATTGTGCTGAAGAACC	57.93	20	CGAATTCTCACAAGTCGCCA	58.572	20	128	1	128
scaf_0000512_20	p3	(ATG)7	21	280	300	ACTCTCTCTCTCTCTCTCTCTCT	58.122	23	TGTTGTTGCTGCTGTTGTTG	58.006	20	176	149	324	ACTCTCTCTCTCTCTCTCTCTCT	58.122	23	TGTTGTTGTTGCTGCTGTTG	58.006	20	179	149	327	ACTCTCTCTCTCTCTCTCTCTCT	58.122	23	GTTGTTGTTGCTGCTGTTGT	58.005	20	178	149	326
scaf_0000514_5	p3	(TGA)5	15	151	165	GGTACGTCTGCCTATCCACA	58.891	20	TGAGTATGAGATAGGCGACGG	58.848	21	101	205	305	TGTCGGGTTGATTGTTTTGGT	58.62	21	ATCCTGTGGATAGGCAGACG	58.956	20	152	77	228	CTGGGTACGTCTGCCTATCC	59.325	20	TGAGTATGAGATAGGCGACGG	58.848	21	104	202	305
scaf_0000518_25	p3	(TCT)7	21	151	171	ATCCCACGTGCAAACTTGTT	58.601	20	AAGTGCAAGCCCAAGTTCTG	58.965	20	256	60	315	AATCCCACGTGCAAACTTGT	58.601	20	AAGTGCAAGCCCAAGTTCTG	58.965	20	257	59	315	TCCCACGTGCAAACTTGTTG	59.546	20	AAGTGCAAGCCCAAGTTCTG	58.965	20	255	61	315
scaf_0000519_17	p3	(GTG)5	15	151	165	TGGTGGTGGTGATATGCCAT	59.074	20	TCCCACGGATGCTCTAACAA	58.728	20	155	154	308	TGGTGGTGGTGATATGCCAT	59.074	20	TTCCCACGGATGCTCTAACA	58.728	20	156	154	309	TTGTGGTGGTGGTGGTGATA	58.859	20	TCCCACGGATGCTCTAACAA	58.728	20	161	148	308
scaf_0000519_26	p3	(AAT)5	15	151	165	AAGACCTGGGATTGGAGGAA	57.94	20	ACCCACTTTTTGTATGGCCG	58.747	20	119	166	284	AAAGACCTGGGATTGGAGGA	57.94	20	ACCCACTTTTTGTATGGCCG	58.747	20	120	165	284	GCCATGTATGTACGGAAAGCA	58.715	21	ACCCACTTTTTGTATGGCCG	58.747	20	249	36	284
scaf_0000519_30	p3	(TTA)5	15	151	165	TGACCACACGCTTCATTTCC	58.765	20	AGGTCGGGGTTGTTACAAGA	58.573	20	103	204	306	GCAATTTGACCACACGCTTC	58.592	20	AGGTCGGGGTTGTTACAAGA	58.573	20	109	198	306	AGTGCAAGTGGGCAATTTGA	58.588	20	AGGTCGGGGTTGTTACAAGA	58.573	20	120	187	306
scaf_0000520_6	p3	(AAT)6	18	151	168	CCTCCCGTATGATTCCTGTCA	58.961	21	TGCCACTAATATTTTGCGCAC	57.856	21	159	44	202	CCTCCCGTATGATTCCTGTCA	58.961	21	TGCCACTAATATTTTGCGCACT	59.248	22	159	44	202	CCTCCCGTATGATTCCTGTCA	58.961	21	GCCACTAATATTTTGCGCACT	57.579	21	158	44	201
scaf_0000520_17	p3	(TGA)5	15	269	283	TCCATCGCCACTATCCTTCC	58.951	20	AACAGCACACCCATACTCCA	58.936	20	209	54	262	CCATCGCCACTATCCTTCCT	58.948	20	AACAGCACACCCATACTCCA	58.936	20	208	55	262	CCTCCATCGCCACTATCCTT	58.948	20	AACAGCACACCCATACTCCA	58.936	20	211	52	262
scaf_0000523_3	p3	(TCT)6	18	151	168	TTGTTTTGCCCTGTACTGCC	58.963	20	TTCCAGAACCATGGGTCGAA	58.939	20	139	114	252	TTGTTTTGCCCTGTACTGCC	58.963	20	TTTCCAGAACCATGGGTCGA	58.939	20	140	114	253	TTGTTTTGCCCTGTACTGCC	58.963	20	AAACCCAGATGAGGTACCCG	59.09	20	115	114	228
scaf_0000523_13	p3	(TGT)5	15	151	165	TCAACTTAACTGGGCCACCA	59.153	20	GCTAATTGCTCAGCAGAGACA	58.374	21	220	65	284	TCAACTTAACTGGGCCACCA	59.153	20	TGCTCAGCAGAGACATTGAAG	58.303	21	214	65	278	GTCAACTTAACTGGGCCACC	58.755	20	GCTAATTGCTCAGCAGAGACA	58.374	21	221	64	284
scaf_0000524_18	p3	(AAT)6	18	151	168	CCAACTTGCCAACTACCTCC	58.465	20	TGAGGTAGAGGAGAGAGAGAGG	58.954	22	141	173	313	CCAACTTGCCAACTACCTCC	58.465	20	GAGGTAGAGGAGAGAGAGAGGA	58.685	22	140	173	312	CCAACTTGCCAACTACCTCC	58.465	20	AGGTAGAGGAGAGAGAGAGGA	57.569	21	139	173	311
scaf_0000526_8	p4	(TAAA)5	20	151	170	TTGCTCTTAGGAGTCCTGCA	58.355	20	CCTCTTGGGAATCAGCTTTAGG	58.45	22	231	18	248	TGCTCTTAGGAGTCCTGCAT	58.129	20	CCTCTTGGGAATCAGCTTTAGG	58.45	22	230	19	248	TGCTCTTAGGAGTCCTGCATT	58.809	21	CCTCTTGGGAATCAGCTTTAGG	58.45	22	230	19	248
scaf_0000530_2	p3	(TAT)7	21	151	171	GCTCAACTAACCACTACCGG	57.994	20	GGTGTTGTTATGATCCAAGTGGT	58.921	23	108	97	204	GGCTCAACTAACCACTACCG	57.994	20	GGTGTTGTTATGATCCAAGTGGT	58.921	23	109	96	204	TGTAGGTGGCTCAACTAACCA	58.669	21	TCCAAGTGGTTTGTTTAGCTCA	58.108	22	103	89	191
scaf_0000531_2	p3	(GAA)5	15	151	165	AGAAGCATACCTGGTTTGTGTG	58.851	22	GCAAAGAAGTCTGACCTGCG	59.485	20	100	161	260	GCATACCTGGTTTGTGTGCT	58.752	20	AGAAGCAAAGAAGTCTGACCTG	58.262	22	100	165	264	AGAAGCATACCTGGTTTGTGT	57.491	21	GCAAAGAAGTCTGACCTGCG	59.485	20	100	161	260
scaf_0000533_23	p4	(CTTT)5	20	151	170	TTGGATTGACCTCATGGCCT	58.998	20	AAGGGCCATGAAGGAAGAGG	59.372	20	213	43	255	TTGGATTGACCTCATGGCCT	58.998	20	GGGCCATGAAGGAAGAGGAA	59.374	20	211	43	253	TTGGATTGACCTCATGGCCT	58.998	20	GGAAGGGCCATGAAGGAAGA	59.374	20	215	43	257
scaf_0000534_21	p3	(GGC)5	15	151	165	CAAAGCCATCTCTCAGTCGC	58.995	20	CATTGCAGTCACAACCACCA	58.969	20	123	83	205	AAGCCATCTCTCAGTCGCTT	59.099	20	CATTGCAGTCACAACCACCA	58.969	20	121	85	205	AAAGCCATCTCTCAGTCGCT	59.099	20	CATTGCAGTCACAACCACCA	58.969	20	122	84	205
scaf_0000535_20	p4	(AAAT)5	20	151	170	AGCAACACCAACCCTTTTGT	58.433	20	GATGTAGATGAGTCGGGCCA	58.959	20	131	96	226	AGCAACACCAACCCTTTTGT	58.433	20	TGATGTAGATGAGTCGGGCC	58.959	20	132	96	227	GCAACACCAACCCTTTTGTG	58.349	20	GATGTAGATGAGTCGGGCCA	58.959	20	130	97	226
scaf_0000536_1	p3	(AAC)5	15	151	165	TGAGAACAAGGGCGGAAGAT	59.016	20	GTTCGGTCATCAGCTTGGTG	59.201	20	190	54	243	TGAGAACAAGGGCGGAAGAT	59.016	20	TTCCCCCTTCGAACAATGGT	59.225	20	246	54	299	TGAGAACAAGGGCGGAAGAT	59.016	20	AGTTCGGTCATCAGCTTGGT	59.313	20	191	54	244
scaf_0000538_8	p3	(CCG)6	18	151	168	TCATCACCACCACTACCACC	59.019	20	TTCTCAACCTCCTCAGCTGG	59.02	20	113	132	244	TCATCACCACCACTACCACC	59.019	20	CGATCCCTTCTCATCCGACA	58.967	20	180	132	311	CAAGTTGGATGTTGGCACCA	58.961	20	TTCTCAACCTCCTCAGCTGG	59.02	20	184	61	244
scaf_0000538_16	p3	(AAT)6	18	151	168	CTCCCAATTCAAGGGCAGTG	58.82	20	CCTGCTTATGCTTTGCCAGT	58.82	20	205	68	272	ACTCCCAATTCAAGGGCAGT	59.22	20	CCTGCTTATGCTTTGCCAGT	58.82	20	206	67	272	CTCCCAATTCAAGGGCAGTG	58.82	20	TCCTGCTTATGCTTTGCCAG	58.533	20	206	68	273
scaf_0000539_1	p3	(TAA)7	21	151	171	GCGAGTCAAATACCCACACC	58.916	20	ACTTTACCGCACACCATCAT	57.51	20	195	27	221	ACCTCTTCGACAACCAAGGT	58.871	20	ACTTTACCGCACACCATCAT	57.51	20	178	44	221	CACCTCTTCGACAACCAAGG	58.487	20	ACTTTACCGCACACCATCAT	57.51	20	179	43	221
scaf_0000541_28	p3	(CTT)5	15	151	165	CTGCAGTTAAAGGAGGGGGA	59.008	20	ATGTTCTAGCTTCGCATGCG	59.067	20	107	103	209	TGTTCCCCTAAGAAGCTGCA	58.936	20	ATGTTCTAGCTTCGCATGCG	59.067	20	122	88	209	TCCCCTAAGAAGCTGCAGTT	58.638	20	ATGTTCTAGCTTCGCATGCG	59.067	20	119	91	209
scaf_0000541_30	p3	(CCG)6	18	151	168	CGGCCCCTTTTCATGATCAG	58.973	20	TGCTCTGTGTCCCACCATAG	59.095	20	112	188	299	CTCCACCCTCCAATCCTCTC	58.873	20	CTGATCATGAAAAGGGGCCG	58.973	20	117	91	207	CTCCACCCTCCAATCCTCTC	58.873	20	TCACTGGAGAGGGTGTTGTC	58.951	20	160	91	250
scaf_0000543_13	p3	(GTG)7	21	151	171	GTGTTGATGTGGTTGGTGGG	59.327	20	ACTTTTTGGCTGTCCATCGT	58.019	20	131	121	251	GGTGTTGATGTGGTTGGTGG	59.327	20	ACTTTTTGGCTGTCCATCGT	58.019	20	132	120	251	GGTGGTGTTGATGTGGTTGG	59.327	20	ACTTTTTGGCTGTCCATCGT	58.019	20	135	117	251
scaf_0000543_15	p3	(AAT)6	18	151	168	GGCCCACTTGTCCATTCAAG	59.109	20	AAGGACCATGTCTCAGCGAT	58.801	20	256	61	316	GGCCCACTTGTCCATTCAAG	59.109	20	AGGACCATGTCTCAGCGATC	59.25	20	255	61	315	GGCCCACTTGTCCATTCAAG	59.109	20	GAAGGACCATGTCTCAGCGA	59.467	20	257	61	317
scaf_0000543_17	p4	(AAAT)5	20	151	170	CAGCTACCTAGGGAAGCCAA	58.796	20	AAGATTGGGTTTCGTGGTGC	59.041	20	203	66	268	CAGCTACCTAGGGAAGCCAA	58.796	20	GGCACGTAATGTCAGGAAGC	59.273	20	247	66	312	CAGCTACCTAGGGAAGCCAA	58.796	20	GTGGTGCAGCTTCTCCTTTT	58.678	20	190	66	255
scaf_0000544_21	p4	(AAAG)8	32	151	182	GAAGCCCCATCTTTTGCCAA	59.024	20	GGAGACTTTGTCCTAACACTCC	58.072	22	103	190	292	TCTGTAAGAGATCCAGAACCCA	57.939	22	TTGGCAAAAGATGGGGCTTC	59.024	20	174	36	209	AAGCCCCATCTTTTGCCAAC	59.313	20	GGAGACTTTGTCCTAACACTCC	58.072	22	102	191	292
scaf_0000545_2	p3	(AGA)8	24	151	174	TCCAATGAACCAAACACCACC	58.964	21	ACAGTTTGGTCGTAAATGGGA	57.505	21	203	49	251	CCAATGAACCAAACACCACCT	58.961	21	ACAGTTTGGTCGTAAATGGGA	57.505	21	202	50	251	CCAATGAACCAAACACCACC	57.475	20	ACAGTTTGGTCGTAAATGGGA	57.505	21	202	50	251
scaf_0000545_6	p3	(CTT)5	15	151	165	CCAAACCTTCCTTTGCCTCC	59.031	20	TGGCTTTAGAGGGAAGTGGG	59.008	20	123	26	148	CCCACTTCCCTCTAAAGCCA	59.008	20	ATTTGACCGACTTTGTGCCC	59.041	20	122	129	250	ACTTCTGGGGGCAACTCTAC	59.015	20	ATTTGACCGACTTTGTGCCC	59.041	20	178	73	250
scaf_0000545_9	p3	(GCG)5	15	151	165	GAAGTAAGGCTGTCGGAGGA	58.816	20	GAGAGATTCATCCCCGGGAG	59.027	20	113	165	277	AGTAAGGCTGTCGGAGGAAG	58.813	20	GAGAGATTCATCCCCGGGAG	59.027	20	111	167	277	AGTTGGGGGTGAGAGATTCC	58.71	20	GAGAGATTCATCCCCGGGAG	59.027	20	178	100	277
scaf_0000545_10	p3	(AGA)5	15	151	165	AGGGTTCCAAAAGGAGGTGT	58.768	20	CACCGGGAAAATCGCTTCTT	58.835	20	195	116	310	AGGGTTCCAAAAGGAGGTGT	58.768	20	ACCGGGAAAATCGCTTCTTC	58.55	20	194	116	309	AGGGTTCCAAAAGGAGGTGT	58.768	20	GTCACCGGGAAAATCGCTTC	59.553	20	197	116	312
scaf_0000545_17	p3	(CAC)7	21	151	171	TTCCAGCTTTCACCTTTGCC	58.96	20	GCACTTCAAAAGGTGGCTGA	58.968	20	164	123	286	TTCCAGCTTTCACCTTTGCC	58.96	20	AGCACTTCAAAAGGTGGCTG	58.965	20	165	123	287	TTCCAGCTTTCACCTTTGCC	58.96	20	CCACCCATTGAAGAGTTGCC	59.109	20	124	123	246
scaf_0000547_4	p3	(ACC)6	18	151	168	TCTCCTCCATTCACCCACAC	59.016	20	GTGGTGGTGGTGGTGGTATA	59.014	20	113	54	166	TCTCCTCCATTCACCCACAC	59.016	20	GAGGCAATTGGTTGTGGTGT	58.96	20	159	54	212	TCTCCTCCATTCACCCACAC	59.016	20	TTGGTGGAGGCAATTGGTTG	58.953	20	165	54	218
scaf_0000547_5	p3	(AAT)5	15	151	165	AAAAGAGAGAGGCTGGGGTG	59.305	20	CCCCATCTGTGCAAGTTTGT	58.669	20	260	6	265	AAAAGAGAGAGGCTGGGGTG	59.305	20	ACCCCATCTGTGCAAGTTTG	58.669	20	261	6	266	AAAAGAGAGAGGCTGGGGTG	59.305	20	CACCCCATCTGTGCAAGTTT	58.669	20	262	6	267
scaf_0000547_15	p3	(ATG)5	15	151	165	GCCCCACATTGCCACTTAAA	59.027	20	CCATGGCTGGTTGAGTTGAG	58.829	20	179	10	188	TTAAACACCCCTACCCCACC	58.925	20	CCATGGCTGGTTGAGTTGAG	58.829	20	142	47	188	GCCACTTAAATCACCCCCAC	58.817	20	CCATGGCTGGTTGAGTTGAG	58.829	20	169	20	188
scaf_0000550_3	p3	(GGT)5	15	151	165	GGTGGATGTGAGGGTGAAGA	59.016	20	GGACATCGATTTGGTTCCGG	58.986	20	145	169	313	GGTGGATGTGAGGGTGAAGA	59.016	20	CGGCGGCTTACTTCTCTCTA	58.977	20	128	169	296	ATGGTAAAGACGGTGGTGGT	58.938	20	GGACATCGATTTGGTTCCGG	58.986	20	175	139	313
scaf_0000551_5	p4	(AAAC)6	24	151	174	TGCCATTTTTCTTCCTCACCA	58.044	21	AGCCCAAGAGGTATGGCAAA	59.296	20	111	124	234	TGCCATTTTTCTTCCTCACCA	58.044	21	AAGCCCAAGAGGTATGGCAA	59.296	20	112	124	235	TGCCATTTTTCTTCCTCACCA	58.044	21	AAAGCCCAAGAGGTATGGCA	59.296	20	113	124	236
scaf_0000552_10	p3	(TTC)14	42	151	192	CGCGGTTTGCCATTGATTTT	58.573	20	TGGGTCGAATCAAGTCGGAA	59.029	20	234	97	330	CGCGGTTTGCCATTGATTTT	58.573	20	TTGGGTCGAATCAAGTCGGA	59.029	20	235	97	331	TGGGCCATGAATTCTAGGCT	58.775	20	GTCGAATCAAGTCGGAACCC	58.643	20	278	50	327
scaf_0000552_12	p3	(TTA)5	15	151	165	ACAGTTCACTTCAAAACCCTGA	58.037	22	CGCCTAATAGATCAAATCAGTGC	57.725	23	268	7	274	TGACAGTTCACTTCAAAACCCT	58.037	22	CGCCTAATAGATCAAATCAGTGC	57.725	23	270	5	274	CTGACAGTTCACTTCAAAACCCT	59.052	23	CGCCTAATAGATCAAATCAGTGC	57.725	23	271	4	274
scaf_0000553_28	p3	(ATA)6	18	151	168	ACAAAGAAGCGGGATGGAGA	59.016	20	ACGGTGGTGAATGAAACTGC	59.048	20	249	21	269	ACAAAGAAGCGGGATGGAGA	59.016	20	CGGTGGTGAATGAAACTGCT	58.762	20	248	21	268	AGGGATACAAAGAAGCGGGA	58.42	20	ACGGTGGTGAATGAAACTGC	59.048	20	255	15	269
scaf_0000554_19	p3	(CAA)7	21	151	171	CCGCAACAACAACAACAACA	58.297	20	GCTCTGTTGGGTGTGGATTC	58.831	20	108	147	254	ACCGCAACAACAACAACAAC	58.296	20	GCTCTGTTGGGTGTGGATTC	58.831	20	109	146	254	CCGCAACAACAACAACAACA	58.297	20	TTTTGAGGGCTGCTCTGTTG	58.679	20	119	147	265
scaf_0000557_3	p3	(AAC)5	15	151	165	ACTGATTGTCTCCACCACCA	58.566	20	TTTCCCCCAGTTTGCAATGG	58.945	20	164	69	232	ACTGATTGTCTCCACCACCA	58.566	20	CCCCAGTTTGCAATGGAAGT	58.659	20	160	69	228	ACTGATTGTCTCCACCACCA	58.566	20	CCCCCAGTTTGCAATGGAAG	59.39	20	161	69	229
scaf_0000558_7	p3	(ATG)7	21	151	171	ATGATGATGGTGGTGGTGGT	58.998	20	AGCTTTCCTCTACCGATAGCC	59.035	21	133	162	294	GGTGGTGGTGGAGTTGGATA	59.011	20	AGCTTTCCTCTACCGATAGCC	59.035	21	122	173	294	ATGATGATGGTGGTGGTGGT	58.998	20	CTTTCCTCTACCGATAGCCCA	58.683	21	131	162	292
scaf_0000559_5	p3	(GAA)6	18	151	168	GCACACGGCTTGAAGAAGAT	58.84	20	AGGGCTTCGGGTAGTAGAGA	59.075	20	180	95	274	GCACACGGCTTGAAGAAGAT	58.84	20	CAGCAGGAGGAGAACTAGGG	58.881	20	196	95	290	TTTCTCTCCACTCACGCACA	59.25	20	AGGGCTTCGGGTAGTAGAGA	59.075	20	195	80	274
scaf_0000559_12	p3	(TGA)7	21	3	23	TGTCAATGAAAGCACCGTGT	58.326	20	AGCAAGGGAATTCCAAAAGCA	58.672	21	159	70	228	TGTGTCAATGAAAGCACCGT	58.326	20	AGCAAGGGAATTCCAAAAGCA	58.672	21	161	68	228	GTGTCAATGAAAGCACCGTG	57.963	20	AGCAAGGGAATTCCAAAAGCA	58.672	21	160	69	228
scaf_0000559_14	p3	(TCT)9	27	151	177	ACGAATTCAAGCGTTGGAGT	58.121	20	CCAACCACCATCAACACACA	58.602	20	100	23	122	ACGAATTCAAGCGTTGGAGT	58.121	20	ACCAACCACCATCAACACAC	58.601	20	101	23	123	CGAATTCAAGCGTTGGAGTGA	59.202	21	ACCAACCACCATCAACACAC	58.601	20	100	24	123
scaf_0000563_7	p4	(AAAT)5	20	151	170	TGGTTGCATTCCCAACATGG	59.025	20	AGTCATCACTTCCCCATCTACC	58.958	22	217	74	290	TGGTTGCATTCCCAACATGG	59.025	20	TCATCACTTCCCCATCTACCA	57.871	21	215	74	288	TGGTTGCATTCCCAACATGG	59.025	20	GTCATCACTTCCCCATCTACCA	59.228	22	216	74	289
scaf_0000564_16	p3	(CAT)5	15	151	165	CCACTGATAGCCCAAAACAGA	57.928	21	TGATGATGATGGTGGAGTTGGA	59.154	22	108	53	160	TCCACTGATAGCCCAAAACAG	57.928	21	TGATGATGATGGTGGAGTTGGA	59.154	22	109	52	160	CCACTGATAGCCCAAAACAGA	57.928	21	TGATGATGATGGTGGAGTTGG	57.714	21	108	53	160
scaf_0000565_8	p3	(GTT)5	15	151	165	TCGGCCTGTAGAGGATCAAC	58.888	20	ATGTCTGTACCAGCTTCGGT	58.733	20	122	11	132	CGGCCTGTAGAGGATCAACT	58.885	20	ATGTCTGTACCAGCTTCGGT	58.733	20	121	12	132	TCGGCCTGTAGAGGATCAAC	58.888	20	CAACAACAACCATCCCCACC	59.321	20	149	11	159
scaf_0000566_8	p3	(TAT)5	15	151	165	TCTCATGAGCTTGGAGTTGC	57.895	20	TGATAGGAATGGAGGGTAGGGA	59.199	22	139	112	250	CTCATGAGCTTGGAGTTGCT	57.889	20	TGATAGGAATGGAGGGTAGGGA	59.199	22	138	113	250	TCTCATGAGCTTGGAGTTGC	57.895	20	TGATAGGAATGGAGGGTAGGG	57.724	21	139	112	250
scaf_0000567_11	p3	(AAT)7	21	151	171	TCCCATACCCAACAAACCCA	58.841	20	TGAATCATGGCCACGCTTTC	59.189	20	106	107	212	CTATTGCCACCACATTGCCA	58.816	20	TGAATCATGGCCACGCTTTC	59.189	20	142	71	212	ACTATTGCCACCACATTGCC	58.815	20	TGAATCATGGCCACGCTTTC	59.189	20	143	70	212
scaf_0000568_9	p4	(CTAA)5	20	151	170	ACATTCCTTAACTGCTCACTGT	57.642	22	TGGAGGAGGTTGTTCAAACTT	57.337	21	108	173	280	ACATTCCTTAACTGCTCACTGT	57.642	22	TTGGAGGAGGTTGTTCAAACT	57.337	21	109	173	281	ACTGCTCACTGTTAACATTCCA	57.915	22	GATTGGAGGAGGTTGTTCAAACT	58.855	23	101	183	283
scaf_0000570_1	p3	(TTC)5	15	151	165	ATGACCTCCTTGGCCTGTTC	59.67	20	GAGAGCACAAACCTTGGCAA	58.968	20	231	31	261	GATGACCTCCTTGGCCTGTT	59.67	20	GAGAGCACAAACCTTGGCAA	58.968	20	232	30	261	ATGACCTCCTTGGCCTGTTC	59.67	20	CAACACTGAAGGGCAAGCAT	59.036	20	214	31	244
scaf_0000570_5	p4	(ATTT)5	20	151	170	CTCTCTACAAGATGCATCGGC	58.598	21	CCCGTGAAACCTTGTCCATG	59.119	20	274	39	312	CTCTCTACAAGATGCATCGGC	58.598	21	TCAGACCCGTGAAACCTTGT	59.165	20	279	39	317	CTCTCTACAAGATGCATCGGC	58.598	21	CAGACCCGTGAAACCTTGTC	58.773	20	278	39	316
scaf_0000570_12	p3	(TGA)6	18	151	168	TGGGGTTTTGCCTTAATTTTGG	57.908	22	CCTCCACTGATAGCTCAAAACA	58.057	22	219	59	277	TGGGGTTTTGCCTTAATTTTGG	57.908	22	CCTCCACTGATAGCTCAAAACAG	59.062	23	219	59	277	TGGGGTTTTGCCTTAATTTTGG	57.908	22	TCCTCCACTGATAGCTCAAAAC	57.792	22	220	59	278
scaf_0000571_2	p3	(TAA)6	18	151	168	GCCTTCCATTGGGTGCTAAT	58.219	20	TGGCAAATTCAGTGTTGATGC	57.971	21	121	72	192	AACTTGGCCTTCCATTGGGT	59.809	20	TGGCAAATTCAGTGTTGATGC	57.971	21	127	66	192	GCCTTCCATTGGGTGCTAAT	58.219	20	GCAAATTCAGTGTTGATGCTCG	59.087	22	119	72	190
scaf_0000571_7	p3	(CAA)5	15	278	292	GCTCTGGGGGATGATCAAGA	58.865	20	TCTGGTGTGTGGTTATTGTTGA	57.842	22	124	1	124	AGCTCTGGGGGATGATCAAG	58.861	20	TCTGGTGTGTGGTTATTGTTGA	57.842	22	125	0	124	GCTCTGGGGGATGATCAAGA	58.865	20	AGATCTGGTGTGTGGTTATTGT	57.359	22	127	1	127
scaf_0000571_8	p3	(CAA)5	15	151	165	ATATGCAAACTACACGGGACA	57.38	21	AGAATTATCCCCACCAACACTC	57.763	22	100	164	263	AATATGCAAACTACACGGGACA	58.055	22	GAATTATCCCCACCAACACTCA	58.037	22	100	163	262	ACAATATGCAAACTACACGGGA	58.055	22	GAATTATCCCCACCAACACTCA	58.037	22	102	161	262
scaf_0000575_6	p3	(ATA)13	39	151	189	GGGAGAGGGAAAGAGAGACG	58.892	20	GTCGCGGAAAGGTGAATGAT	58.63	20	268	25	292	GGGAGAGGGAAAGAGAGACG	58.892	20	AGTCGCGGAAAGGTGAATGA	59.68	20	269	25	293	TCTTTGTCTTCTGCTGTGCC	58.402	20	GTCGCGGAAAGGTGAATGAT	58.63	20	224	69	292
scaf_0000575_7	p4	(AAAT)5	20	151	170	CCTCGTAGTCACCTGAACAAAC	58.942	22	AGAGCCATTGACTGGGGAAA	58.924	20	273	0	272	CCTCGTAGTCACCTGAACAAAC	58.942	22	ACTGGGGAAAATGGCCAGAT	59.288	20	263	0	262	CCTCGTAGTCACCTGAACAAA	57.62	21	AGAGCCATTGACTGGGGAAA	58.924	20	273	0	272
scaf_0000576_5	p4	(TCGT)5	20	151	170	TTTCAGCACCTGATGGCAAC	59.039	20	TACGCTTCGGGAGTTCCTTT	59.029	20	165	57	221	TTTCAGCACCTGATGGCAAC	59.039	20	CTCTCTCTACGCTTCGGGAG	59.058	20	172	57	228	AGGGGCAAATCCGGAATACA	59.077	20	TACGCTTCGGGAGTTCCTTT	59.029	20	123	99	221
scaf_0000576_12	p3	(TCT)6	18	151	168	TTCTTCTCCGGCACCTTCTT	58.943	20	AAACACCTGGAGCAAAGCAG	58.965	20	109	201	309	GGCGCAGGGGATTAAAACTC	59.261	20	AAACACCTGGAGCAAAGCAG	58.965	20	178	132	309	TTCTTCCCCTTCTTCTCCGG	58.723	20	AAACACCTGGAGCAAAGCAG	58.965	20	118	192	309
scaf_0000576_21	p3	(GGT)6	18	151	168	AACATGAGCATGGTGGGAGA	59.006	20	GGTCCCCCAACCATAACTCA	59.003	20	237	33	269	AACATGAGCATGGTGGGAGA	59.006	20	TTTCTCTCACCTCACCGGTC	59.033	20	253	33	285	TGTAAGATGGTGGATGGGGG	58.778	20	GGTCCCCCAACCATAACTCA	59.003	20	143	127	269
scaf_0000577_10	p3	(AGG)7	21	151	171	GAAGGAGAAGCAGGAGGAGG	59.17	20	CCGTTGTGTTCTTCACTGGG	59.056	20	116	139	254	GGAGAAGGAGAAGCAGGAGG	59.17	20	CCGTTGTGTTCTTCACTGGG	59.056	20	119	136	254	AAGGAGAAGCAGGAGGAGGA	59.585	20	CCGTTGTGTTCTTCACTGGG	59.056	20	115	140	254
scaf_0000578_15	p3	(TTG)6	18	151	168	GTGGAATAGGTTGTGGTGGC	58.826	20	ACAACAATAACCACCGCCAC	59.044	20	119	38	156	GTGGAATAGGTTGTGGTGGC	58.826	20	AACAACAATAACCACCGCCA	58.306	20	120	38	157	GGTGGAATAGGTTGTGGTGG	58.166	20	ACAACAATAACCACCGCCAC	59.044	20	120	37	156
scaf_0000579_11	p3	(TAA)6	18	151	168	TTACCGATTGGCACATGCAA	58.461	20	CGAAGGTGGGAAGACTTGAA	57.456	20	118	199	316	ACCGATTGGCACATGCAATA	58.239	20	CGAAGGTGGGAAGACTTGAA	57.456	20	116	201	316	TACCGATTGGCACATGCAAT	58.239	20	CGAAGGTGGGAAGACTTGAA	57.456	20	117	200	316
scaf_0000581_10	p4	(TTTA)6	24	151	174	GAACTGGAGAAAAGCCAAGTCA	58.786	22	GCAATGTATAGGGGCGCAAA	58.971	20	228	9	236	TGAACTGGAGAAAAGCCAAGTC	58.786	22	GCAATGTATAGGGGCGCAAA	58.971	20	229	8	236	AACTGGAGAAAAGCCAAGTCA	57.703	21	GCAATGTATAGGGGCGCAAA	58.971	20	227	10	236
scaf_0000583_2	p3	(AAT)6	18	151	168	CACCATTTGTGTCACCCGAA	58.686	20	GCAGTTGGCCCAAGTTTGTA	58.963	20	257	50	306	CACCATTTGTGTCACCCGAA	58.686	20	TAATTCGCAGTTGGCCCAAG	58.827	20	263	50	312	CACCATTTGTGTCACCCGAA	58.686	20	TTAATTCGCAGTTGGCCCAA	58.378	20	264	50	313
scaf_0000583_7	p3	(TAC)8	24	151	174	GCAAACCTTTGGGTATCGGG	59.185	20	ACTGTAGGACTAGTTGTATCCGA	57.892	23	101	217	317	GGCAAACCTTTGGGTATCGG	59.185	20	ACTGTAGGACTAGTTGTATCCGA	57.892	23	102	216	317	GCAAACCTTTGGGTATCGGG	59.185	20	GTTCGAACTGTAGGACTAGTTGT	57.881	23	107	217	323
scaf_0000583_9	p3	(TGC)5	15	151	165	TTCTTGCAGACTCGGGTGAT	59.023	20	TCAATGTGCTCAAGGGGGAT	58.998	20	173	85	257	CGTGGCCCATGTAATTCCAG	58.976	20	TCAATGTGCTCAAGGGGGAT	58.998	20	135	123	257	TTCTTGCAGACTCGGGTGAT	59.023	20	GTATACGACCTCAGCCGGAA	58.973	20	126	85	210
scaf_0000585_5	p3	(AGG)9	27	151	177	AGAGATGGGAGGAGAGAGGG	59.14	20	ATCACCTGATCGCATCCCTT	58.865	20	115	109	223	AGAGATGGGAGGAGAGAGGG	59.14	20	AATCACCTGATCGCATCCCT	58.865	20	116	109	224	AGAGATGGGAGGAGAGAGGG	59.14	20	CAATCACCTGATCGCATCCC	58.767	20	117	109	225
scaf_0000592_2	p3	(TTA)5	15	3	17	ACACCCAGGAACGAGATTGA	58.652	20	GACTGTACTGGTGGACACGA	59.043	20	126	95	220	ACACCCAGGAACGAGATTGA	58.652	20	TGGACTGTACTGGTGGACAC	58.955	20	128	95	222	ACACCCAGGAACGAGATTGA	58.652	20	GGTTGGACTGTACTGGTGGA	58.947	20	131	95	225
scaf_0000592_12	p3	(ATT)8	24	151	174	GGTTGAACCCTAATTCTTAAGGC	57.422	23	AGGGTTTGAATTGGGTGGGA	59.136	20	145	109	253	GGTTGAACCCTAATTCTTAAGGC	57.422	23	GGTTTGAATTGGGTGGGAGG	58.734	20	143	109	251	GGTTGAACCCTAATTCTTAAGGC	57.422	23	GGGTTTGAATTGGGTGGGAG	58.734	20	144	109	252
scaf_0000592_22	p4	(AAGA)6	24	151	174	TGTTTGTGGAAGGTTTTTGGC	58.021	21	CCTTTGGTTTAGTTGAGCTTCTC	57.636	23	119	1	119	GTTTGTGGAAGGTTTTTGGCT	57.74	21	CCTTTGGTTTAGTTGAGCTTCTC	57.636	23	118	2	119	TTGTTTGTGGAAGGTTTTTGGC	58.661	22	CCTTTGGTTTAGTTGAGCTTCTC	57.636	23	120	0	119
scaf_0000593_11	p3	(CTT)7	21	151	171	AACAGGTGAATATGGGGCCA	58.993	20	TGGAACAGTGAAGGTGACGA	58.884	20	193	35	227	AACAGGTGAATATGGGGCCA	58.993	20	GAACAGTGAAGGTGACGAGC	58.859	20	191	35	225	AACAGGTGAATATGGGGCCA	58.993	20	GTGGAACAGTGAAGGTGACG	58.782	20	194	35	228
scaf_0000593_29	p4	(GGTG)7	28	335	362	GTAAGTGGTGGCAAGTGGTG	59.048	20	CACCCACCTGCTACCACTAC	59.751	20	168	77	244	GAAAGTGGTGACGATGGGTG	58.843	20	CACCCACCTGCTACCACTAC	59.751	20	138	107	244	GTGGAAAGTGGTGACGATGG	58.843	20	CACCCACCTGCTACCACTAC	59.751	20	141	104	244
scaf_0000593_30	p3	(GGT)9	27	10	36	GTAGTGGTAGCAGGTGGGTG	59.751	20	ACTCACTACCACCCACAACC	59.237	20	157	41	197	GTAGTGGTAGCAGGTGGGTG	59.751	20	CCACTCACTACCACCCACAA	59.238	20	159	41	199	TAGTGGTAGCAGGTGGGTGA	59.884	20	ACTCACTACCACCCACAACC	59.237	20	156	42	197
scaf_0000594_22	p3	(TTA)6	18	151	168	TGTAGAGACTGGTTCCCCAA	57.591	20	TTGTAAATCGAACCGGTCCA	57.164	20	100	8	107	TTGTAGAGACTGGTTCCCCA	57.591	20	TGTAAATCGAACCGGTCCAA	57.164	20	100	7	106	TTGTAGAGACTGGTTCCCCA	57.591	20	TTGTAAATCGAACCGGTCCA	57.164	20	101	7	107
scaf_0000595_30	p3	(TTA)10	30	151	180	TTGCTTTGAAAGGCTGGGTC	58.96	20	AGCACGAACCAACAAACTCA	58.255	20	273	29	301	TGACCCTTGCTTTGAAAGGC	58.96	20	AGCACGAACCAACAAACTCA	58.255	20	279	23	301	CTTGCTTTGAAAGGCTGGGT	58.957	20	AGCACGAACCAACAAACTCA	58.255	20	274	28	301
scaf_0000597_10	p3	(CTT)5	15	151	165	TCACTTCGTTCCCTTGCTCT	58.951	20	CTAGATCTCGCACTCCTCGG	59.128	20	130	167	296	CATGTTGTGATGACCGGCTC	59.271	20	CTAGATCTCGCACTCCTCGG	59.128	20	194	103	296	TCACTTCGTTCCCTTGCTCT	58.951	20	CGGACTAGATCTCGCACTCC	59.411	20	134	167	300
scaf_0000599_2	p4	(AAAT)5	20	151	170	CACCATTGTCCAAAACCGCT	59.327	20	TAGAATCCGGGCTCCCATTC	58.943	20	267	51	317	CACCATTGTCCAAAACCGCT	59.327	20	CTAGAATCCGGGCTCCCATT	58.94	20	268	51	318	CACCATTGTCCAAAACCGCT	59.327	20	GCTCCCATTCTGAGGTCAGT	59.092	20	257	51	307
scaf_0000599_5	p3	(CCG)5	15	151	165	ACATCAAACACAAAGGCGCT	58.968	20	GATGCGGAGACAGTAGACCA	58.896	20	196	116	311	ACATCAAACACAAAGGCGCT	58.968	20	TCGTTTGTGGGTGCTTGTTT	58.822	20	149	116	264	CACATCAAACACAAAGGCGC	58.869	20	GATGCGGAGACAGTAGACCA	58.896	20	197	115	311
scaf_0000599_7	p3	(GTG)10	30	151	180	GTGGTAGCGGTAGTGATGGT	59.178	20	ACCATGACCACCACTACCAC	59.309	20	100	201	300	GTGGTAGCGGTAGTGATGGT	59.178	20	ACCACCATGACCACCACTAC	59.309	20	103	201	303	GTGGTAGCGGTAGTGATGGT	59.178	20	CACCATGACCACCACTACCA	59.31	20	101	201	301
scaf_0000600_13	p4	(ATTT)6	24	151	174	ATCAACCATCCTTCCCAGCA	58.998	20	ACTTGAAGCCATGCCACAAG	59.036	20	232	69	300	ATCAACCATCCTTCCCAGCA	58.998	20	GACTTGAAGCCATGCCACAA	59.039	20	233	69	301	ATCAACCATCCTTCCCAGCA	58.998	20	ACCTCACAACCAAAATGCCC	58.952	20	160	69	228
scaf_0000600_17	p4	(TTTC)8	32	151	182	TGGGCAGTGCAAGTAGAAGT	59.235	20	TCTTCTTAGAAGTGTCCGTGCT	59.108	22	198	30	227	TGGGCAGTGCAAGTAGAAGT	59.235	20	GGGAATGGGTATAGAACACCG	57.878	21	117	30	146	TGGGCAGTGCAAGTAGAAGT	59.235	20	TGAGTGTCATGTCATGTTGGTG	58.859	22	237	30	266
scaf_0000602_7	p3	(ACA)5	15	151	165	CGGTCGGTTTTAGCAGATCG	59.079	20	ACCCAGTCTCTCGAGTTGTG	59.038	20	167	96	262	ACCACCACCACAACAACAAC	59.108	20	ACCCAGTCTCTCGAGTTGTG	59.038	20	122	141	262	CCACCACCACAACAACAACA	59.109	20	ACCCAGTCTCTCGAGTTGTG	59.038	20	121	142	262
scaf_0000602_23	p3	(TGG)6	18	151	168	CGATGGCAATGGCAGATGAA	58.973	20	GCCACCATTGTAGCTATGGC	59.046	20	277	0	276	CGATGGCAATGGCAGATGAA	58.973	20	TCACTAACCACCACCACCTC	58.947	20	222	0	221	CGATGGCAATGGCAGATGAA	58.973	20	TGCAACTACCATCGTCGTCT	59.114	20	243	0	242
scaf_0000602_24	p3	(TGG)6	18	15	32	GAACAATGGTGGTGGTGGTG	59.327	20	GCCACCATTGTAGCTATGGC	59.046	20	133	8	140	GTGAACAATGGTGGTGGTGG	59.327	20	GCCACCATTGTAGCTATGGC	59.046	20	135	6	140	GGTGAACAATGGTGGTGGTG	59.327	20	GCCACCATTGTAGCTATGGC	59.046	20	136	5	140
scaf_0000602_31	p3	(TTG)8	24	151	174	TGGCTAGTGTTTGGCATTGT	58.006	20	GCTGTGCCTGATTTTTGTGC	58.858	20	221	81	301	TGGCTAGTGTTTGGCATTGTT	58.685	21	GCTGTGCCTGATTTTTGTGC	58.858	20	221	81	301	TTGGCTAGTGTTTGGCATTGT	58.685	21	GCTGTGCCTGATTTTTGTGC	58.858	20	222	80	301
scaf_0000602_32	p3	(TTA)5	15	151	165	TCTCAGCAAGCAAGCAGTTT	58.316	20	ACTGCTCTGCCAAGTACGAT	59.102	20	177	98	274	TTCTCAGCAAGCAAGCAGTT	58.316	20	ACTGCTCTGCCAAGTACGAT	59.102	20	178	97	274	TTTCTCAGCAAGCAAGCAGT	58.316	20	ACTGCTCTGCCAAGTACGAT	59.102	20	179	96	274
scaf_0000604_7	p3	(TAT)12	36	151	186	CGATCGTCTCCCTCTCCCT	59.85	19	AGATAAAGACGGGAGAAAAGCG	58.477	22	100	1	100	CGATCGTCTCCCTCTCCCTC	60.887	20	AGATAAAGACGGGAGAAAAGCG	58.477	22	100	1	100	GCGATCGTCTCCCTCTCC	58.964	18	GATAAAGACGGGAGAAAAGCGA	58.481	22	100	0	99
scaf_0000605_1	p3	(GTG)7	21	151	171	ATGCTGTAAGTGCCTCACCT	59.013	20	AGAGCCCTGAAGATGCACTT	59.01	20	234	49	282	CCTTTTGGGTCTCTCCTCGT	59.023	20	AGAGCCCTGAAGATGCACTT	59.01	20	217	66	282	ATGCTGTAAGTGCCTCACCT	59.013	20	GGTCAGACAGGGTCACTTGA	58.951	20	205	49	253
scaf_0000605_9	p3	(TAT)15	45	151	195	GCAACATCAGCTAGCACACA	58.841	20	GGCATGCCCTAGATTTATGGG	58.55	21	241	62	302	AGCAACATCAGCTAGCACAC	58.553	20	GGCATGCCCTAGATTTATGGG	58.55	21	242	61	302	GCCTCAAAATCCCTCTTCCC	58.231	20	GGCATGCCCTAGATTTATGGG	58.55	21	173	130	302
scaf_0000607_5	p3	(ACC)8	24	151	174	CACACATATTACCACCGCCG	59.066	20	ATGGTGGTGTGAGTGGTGAT	58.933	20	131	114	244	AAACCTTACCACCACCACCA	59.072	20	ATGGTGGTGTGAGTGGTGAT	58.933	20	102	143	244	CACACATATTACCACCGCCG	59.066	20	AATGGTGGTGTGAGTGGTGA	59.157	20	132	114	245
scaf_0000608_8	p3	(TGT)6	18	151	168	CTCCTTTGAACGATGGAGGT	57.23	20	ATGCCTATGCCACCACTGTA	58.788	20	102	17	118	CTCCTTTGAACGATGGAGGT	57.23	20	ATAGCAACAGCAACCACCAC	58.752	20	130	17	146	CTCCTTTGAACGATGGAGGT	57.23	20	CAATGCCTATGCCACCACTG	59.257	20	104	17	120
scaf_0000609_10	p3	(AAT)6	18	151	168	TCTCAATGCCGGAAGACTGT	59.023	20	CAGAGTTTTGCCAGCCAACT	58.965	20	101	215	315	AGACCACCGGAAACCATTCT	58.935	20	CAGAGTTTTGCCAGCCAACT	58.965	20	121	195	315	GAACCTTTCATGTGCCTCGG	59.195	20	CAGAGTTTTGCCAGCCAACT	58.965	20	141	175	315
scaf_0000611_16	p3	(GAG)5	15	151	165	ATGCCGGGAAACTTGTTCAC	59.041	20	GAGGATGCCTTGTTTGGAGC	59.186	20	107	84	190	CCGGGAAACTTGTTCACCAG	59.048	20	GAGGATGCCTTGTTTGGAGC	59.186	20	104	87	190	ATGCCGGGAAACTTGTTCAC	59.041	20	GCCTTGTTTGGAGCTGGATT	58.739	20	101	84	184
scaf_0000612_9	p3	(ATA)6	18	151	168	TCCACCTTTTTACATTGCCACT	58.428	22	TCAACGATTCTGTTTGCACCA	58.707	21	195	57	251	TGCCACTTGTCTTTAATCCCT	57.193	21	TCAACGATTCTGTTTGCACCA	58.707	21	180	72	251	TCCACCTTTTTACATTGCCACT	58.428	22	CAACGATTCTGTTTGCACCA	57.227	20	194	57	250
scaf_0000613_18	p3	(GTG)7	21	151	171	CCTGAGTCACTCGATGGTCA	58.823	20	GCATTTGCCACCACTCAGAA	59.039	20	120	198	317	ACCTGAGTCACTCGATGGTC	58.822	20	GCATTTGCCACCACTCAGAA	59.039	20	121	197	317	GACCTGAGTCACTCGATGGT	58.822	20	GCATTTGCCACCACTCAGAA	59.039	20	122	196	317
scaf_0000613_24	p3	(GAA)5	15	151	165	GTGCATTTTGTTGTGTCTGGT	57.836	21	AGTTCCATGAGTGGTGTCGG	59.678	20	104	84	187	AGTGCATTTTGTTGTGTCTGGT	59.24	22	AGTTCCATGAGTGGTGTCGG	59.678	20	105	83	187	GAGTGCATTTTGTTGTGTCTGG	58.625	22	AGTTCCATGAGTGGTGTCGG	59.678	20	106	82	187
scaf_0000614_6	p3	(TCT)5	15	151	165	GCCATGAGCAATCCCCAAAT	58.874	20	TTCTTCATGCCCTCACACCT	58.933	20	152	87	238	GCCATGAGCAATCCCCAAAT	58.874	20	AGTCGGGAAAGGATGTGGAG	59.095	20	118	87	204	GCCATGAGCAATCCCCAAAT	58.874	20	GTCGGGAAAGGATGTGGAGA	59.097	20	117	87	203
scaf_0000615_3	p3	(TTA)6	18	151	168	CCCTTGGATCAACCCTCTGT	59.005	20	CAAATCATTTTTGGCCCTTTCG	57.333	22	190	38	227	TCCCTTGGATCAACCCTCTG	58.711	20	CAAATCATTTTTGGCCCTTTCG	57.333	22	191	37	227	CCCTTGGATCAACCCTCTGT	59.005	20	TCATTTTTGGCCCTTTCGATAG	57.018	22	186	38	223
scaf_0000615_14	p3	(ATG)5	15	151	165	ATGGACCACCTCACATGTGT	58.933	20	TGGAGCTCTTTGCATGTATCT	57.08	21	200	67	266	ATGGACCACCTCACATGTGT	58.933	20	CATTTTGGAGCTCTTTGCATGT	58.078	22	205	67	271	ATGGACCACCTCACATGTGT	58.933	20	ACATTTTGGAGCTCTTTGCATG	58.078	22	206	67	272
scaf_0000616_1	p3	(GAG)5	15	151	165	GCTAGTGCTAGTGCTAGGCT	58.963	20	GTTATGAGCGGTGCTGACAA	58.561	20	161	125	285	ACCACCACCCTCCATGAAAT	58.916	20	GTTATGAGCGGTGCTGACAA	58.561	20	108	178	285	GCTAGTGCTAGTGCTAGGCT	58.963	20	ATGAGCGGTGCTGACAAATT	58.462	20	158	125	282
scaf_0000616_8	p4	(ATAA)5	20	151	170	CGCCCATCACTATCACTCGA	59.331	20	TCACTCGGACCAACAATCGA	59.037	20	184	35	218	ACGCCCATCACTATCACTCG	59.614	20	TCACTCGGACCAACAATCGA	59.037	20	185	34	218	CGCCCATCACTATCACTCGA	59.331	20	CACTCGGACCAACAATCGAA	58.209	20	183	35	217
scaf_0000619_4	p3	(TTG)11	33	151	183	AGCAGCAATGGAGGAAGGAT	59.075	20	TCCACCGCCTCAATATCCTC	58.951	20	196	80	275	AGCAGCAATGGAGGAAGGAT	59.075	20	CTCCACCGCCTCAATATCCT	58.948	20	197	80	276	GAAGCAGCAATGGAGGAAGG	58.899	20	TCCACCGCCTCAATATCCTC	58.951	20	198	78	275
scaf_0000619_5	p3	(TGG)5	15	151	165	CTGTGACTGTCTTGGCGATG	58.926	20	TCTTCGCAATCGTCCTCTGA	58.826	20	142	99	240	TCGGATATGCTACTGGTGGC	59.32	20	ACCACCACCACCACCAATAA	59.146	20	137	29	165	TCGGATATGCTACTGGTGGC	59.32	20	AAACTCCATCACCACCACCA	59.15	20	147	29	175
scaf_0000622_10	p3	(TCT)5	15	151	165	GCACTTCACAAAAGACCCAGA	58.702	21	CCGAGAGCAGGATTGTGTGT	60.037	20	258	53	310	AGCACTTCACAAAAGACCCAG	58.699	21	CCGAGAGCAGGATTGTGTGT	60.037	20	259	52	310	AGCACTTCACAAAAGACCCA	57.565	20	CCGAGAGCAGGATTGTGTGT	60.037	20	259	52	310
scaf_0000622_13	p4	(TTAT)5	20	151	170	GAACCTGTTCGATCAACCCA	57.821	20	TGGGCTGTCTACAATTGGACA	59.298	21	221	19	239	TGAACCTGTTCGATCAACCC	57.821	20	TGGGCTGTCTACAATTGGACA	59.298	21	222	18	239	GAACCTGTTCGATCAACCCA	57.821	20	GGATGGGCTGTCTACAATTGG	58.699	21	224	19	242
scaf_0000625_3	p4	(TATT)5	20	151	170	AAGCACATGAGTTCTTCAGCC	58.842	21	TCGGAGATAAGGAATGTGAGCA	58.969	22	100	46	145	AGCACATGAGTTCTTCAGCC	58.181	20	GTCGGAGATAAGGAATGTGAGC	58.614	22	100	47	146	AAGCACATGAGTTCTTCAGCC	58.842	21	GTCGGAGATAAGGAATGTGAGC	58.614	22	101	46	146
scaf_0000625_9	p3	(TTC)6	18	151	168	TTTTGGAGGCCGAGGAATCT	59.008	20	TGGCTTGCTGTGGTAATGAC	58.466	20	135	59	193	GGAGGCCGAGGAATCTAGAC	59.037	20	TGGCTTGCTGTGGTAATGAC	58.466	20	131	63	193	CGAGATCATTTTGGAGGCCG	59.06	20	TGGCTTGCTGTGGTAATGAC	58.466	20	143	51	193
scaf_0000626_5	p3	(TTG)5	15	151	165	TGAGCTACACTGCTGATTGGA	59.098	21	ACCACCATGAGAAGCAACAAC	59.044	21	273	4	276	TGAGCTACACTGCTGATTGGA	59.098	21	CCACCATGAGAAGCAACAACA	59.044	21	272	4	275	GGTTTGAGCTACACTGCTGA	57.83	20	ACCACCATGAGAAGCAACAAC	59.044	21	277	0	276
scaf_0000627_1	p3	(TAA)5	15	151	165	AAATGTTGTTCGCCCCTTCC	59.034	20	TGCATGTTCTCTTAGCGGTC	57.99	20	127	68	194	AAATGTTGTTCGCCCCTTCC	59.034	20	GCATGTTCTCTTAGCGGTCT	57.698	20	126	68	193	AAATGTTGTTCGCCCCTTCC	59.034	20	TGCATGTTCTCTTAGCGGTCT	59.449	21	127	68	194
scaf_0000627_5	p4	(AAAT)6	24	151	174	AGGTGCAGGAGAAAGGAGAA	58.265	20	CGGCTCGACTCAATTGCAAT	59.271	20	125	131	255	AAGGTGCAGGAGAAAGGAGA	58.265	20	CGGCTCGACTCAATTGCAAT	59.271	20	126	130	255	AGGTGCAGGAGAAAGGAGAA	58.265	20	AAACAAGTTCGGCTCGACTC	58.501	20	134	131	264
scaf_0000628_3	p3	(TTA)8	24	151	174	TGGGAGTGCAGAGACCTTTT	58.86	20	CAAAGAAGAAGACACGTGGCA	59.06	21	108	188	295	TTGGGAGTGCAGAGACCTTT	58.86	20	CAAAGAAGAAGACACGTGGCA	59.06	21	109	187	295	TGGGAGTGCAGAGACCTTTT	58.86	20	TCAAAGAAGAAGACACGTGGC	58.79	21	109	188	296
scaf_0000628_8	p4	(TTTG)5	20	151	170	TTTGATGCTGTGGTTGGAGA	57.345	20	GGAACGATCATCATCACCCC	58.116	20	101	190	290	TTGATGCTGTGGTTGGAGAT	57.115	20	GGAACGATCATCATCACCCC	58.116	20	100	191	290	TTTTGATGCTGTGGTTGGAGA	58.057	21	GGAACGATCATCATCACCCC	58.116	20	102	189	290
scaf_0000628_18	p3	(AAT)6	18	151	168	GGAGTCCTTCGTTGATCATTCG	59.139	22	ACACCCCATTTTTGACAGCC	58.952	20	102	0	101	GGAGTCCTTCGTTGATCATTCG	59.139	22	TCATGCTGTAGACACCCCAT	58.416	20	113	0	112	GGAGTCCTTCGTTGATCATTCG	59.139	22	ATCATGCTGTAGACACCCCA	58.416	20	114	0	113
scaf_0000629_2	p3	(TAA)9	27	151	177	ACCCCTTATCGTGTTACCCA	58.045	20	CCATGTTTGTGACGCTCCAA	59.049	20	194	61	254	ACCCCTTATCGTGTTACCCA	58.045	20	ACTCACCATGTTTGTGACGC	59.056	20	199	61	259	ACCCCTTATCGTGTTACCCA	58.045	20	TTTCACAAAGCTCTCACGGC	59.056	20	239	61	299
scaf_0000629_11	p3	(AAG)6	18	151	168	ACTGAACCATTTTCACGGCC	59.041	20	TGTAGGTCCAAGAAGCTGCA	58.944	20	120	177	296	CTGAACCATTTTCACGGCCA	59.042	20	TGTAGGTCCAAGAAGCTGCA	58.944	20	119	178	296	AAGTGCCAGCAACACACATT	58.886	20	GGCCGTGAAAATGGTTCAGT	59.041	20	121	76	196
scaf_0000629_18	p3	(AAC)7	21	151	171	TGGAATACACAGGCCAAGATTG	58.645	22	TGGGTAGCATGGGTTTTCTG	57.786	20	155	114	268	TGGAATACACAGGCCAAGATTG	58.645	22	TGGGTAGCATGGGTTTTCTGA	59.292	21	155	114	268	TGGAATACACAGGCCAAGATTG	58.645	22	GGGTAGCATGGGTTTTCTGA	57.493	20	154	114	267
scaf_0000630_14	p3	(TTA)8	24	151	174	GGGAATCACACAAATGAATGGC	58.475	22	AGCGATTCTATCCACATCCTTCT	59.099	23	165	74	238	GGGAATCACACAAATGAATGGC	58.475	22	GCGATTCTATCCACATCCTTCT	57.736	22	164	74	237	GGGAATCACACAAATGAATGGC	58.475	22	AGCGATTCTATCCACATCCTTC	57.736	22	165	74	238
scaf_0000631_5	p4	(ATTT)7	28	151	178	AGGCACGAATGTACTTCAAGA	57.322	21	TTCTGCTGGGGAAATTGCAC	59.032	20	110	16	125	AGGCACGAATGTACTTCAAGA	57.322	21	GTTCTGCTGGGGAAATTGCA	59.032	20	111	16	126	AGGCACGAATGTACTTCAAGA	57.322	21	TGTTCTGCTGGGGAAATTGC	59.032	20	112	16	127
scaf_0000631_10	p4	(TTTC)5	20	151	170	CTGTCATGGCTCTCTGTTGC	58.915	20	TGGTGAGTCGAGAGCTAAGG	58.535	20	235	84	318	CCTCTGTCATGGCTCTCTGT	58.807	20	TGGTGAGTCGAGAGCTAAGG	58.535	20	238	81	318	CTCTGTTGCCATGCTCCAAA	58.75	20	TGGTGAGTCGAGAGCTAAGG	58.535	20	224	95	318
scaf_0000631_14	p3	(CTT)11	33	151	183	CCCCTTCGAGTTCTACGACA	58.829	20	TCAAACGTTTGTGAGCTCCC	58.695	20	232	23	254	CCCCTTCGAGTTCTACGACA	58.829	20	CAAACGTTTGTGAGCTCCCT	58.691	20	231	23	253	CCCCTTCGAGTTCTACGACA	58.829	20	AACGTTTGTGAGCTCCCTCA	59.532	20	229	23	251
scaf_0000632_6	p3	(CAA)8	24	151	174	CTCACTCCTGCATGACATGG	58.335	20	TGCTTGGACGAGAAAAACCG	59.058	20	198	102	299	CTCACTCCTGCATGACATGG	58.335	20	CCTCAGCTTGTGGATCCTGA	59.093	20	172	102	273	ACCTCAAGCACAGTCACCTA	58.283	20	CCTCAGCTTGTGGATCCTGA	59.093	20	262	12	273
scaf_0000632_8	p3	(CAG)5	15	151	165	CTGCGATCCCTCTCCTCAAT	58.953	20	TTGCCTTCTTACAGACCCGT	58.947	20	229	5	233	ATGTGATCTCGGTGGGGATC	58.948	20	TTGCCTTCTTACAGACCCGT	58.947	20	165	69	233	CTGCGATCCCTCTCCTCAAT	58.953	20	CGATTGTCATCACGAGCCTG	59.074	20	258	5	262
scaf_0000633_8	p3	(AAT)6	18	151	168	TGGCCCAAAACCCTACTTGA	59.146	20	GGGTGAAGTCCATGGATCCA	59.081	20	193	55	247	TGGCCCAAAACCCTACTTGA	59.146	20	CGAGGGTGAAGTCCATGGAT	59.167	20	196	55	250	TGGCCCAAAACCCTACTTGA	59.146	20	AGGGTGAAGTCCATGGATCC	58.783	20	194	55	248
scaf_0000634_11	p3	(TCC)5	15	151	165	CGGGCAGCGAATTAAACTGT	59.198	20	AGGAAGAGGAGGAGGAGGAG	59.066	20	139	33	171	CGGGCAGCGAATTAAACTGT	59.198	20	AGGAGGAAGAGGAGGAGGAG	59.066	20	142	33	174	CGGGCAGCGAATTAAACTGT	59.198	20	AGGAGGAGGAAGAGGAGGAG	59.066	20	145	33	177
scaf_0000635_7	p3	(ATG)10	30	151	180	TGATGATGATGCTGGAGTTGG	58.073	21	CCACCGATAGCCCAAAACAG	58.905	20	117	169	285	TGATGATGATGCTGGAGTTGG	58.073	21	CTATCCTCCACCGATAGCCC	58.813	20	124	169	292	TGATGATGATGCTGGAGTTGG	58.073	21	TCCACCGATAGCCCAAAACA	59.306	20	118	169	286
scaf_0000635_10	p3	(ATG)7	21	151	171	TGATGATGATGGTGGAGTTGGA	59.154	22	GACATCCTCCACCGATAACCT	58.96	21	125	160	284	TGATGATGATGGTGGAGTTGGA	59.154	22	AGACATCCTCCACCGATAACC	58.96	21	126	160	285	GATGGTGGAGTTGGATATGCA	57.787	21	GACATCCTCCACCGATAACCT	58.96	21	118	167	284
scaf_0000636_4	p3	(CAA)10	30	151	180	AGAACCCATCGCTTTCCAGA	59.016	20	CTCACCATCCCTTCTCCGAG	59.25	20	245	59	303	CAGAACCCATCGCTTTCCAG	58.91	20	CTCACCATCCCTTCTCCGAG	59.25	20	246	58	303	GCATTCAGAACCCATCGCTT	58.902	20	CTCACCATCCCTTCTCCGAG	59.25	20	251	53	303
scaf_0000637_4	p3	(TTC)11	33	151	183	CTCACTCACTCAGCGACTGA	59.122	20	GCTCAAATCCCTGCAAAGCA	59.395	20	249	83	331	CTCACTCACTCAGCGACTGA	59.122	20	TGCTCAAATCCCTGCAAAGC	59.395	20	250	83	332	TCTCACTCACTCAGCGACTG	59.122	20	GCTCAAATCCCTGCAAAGCA	59.395	20	250	82	331
scaf_0000639_7	p4	(CATC)6	24	151	174	TCATGTGAAGGCTGTGTCCT	58.941	20	GAGGAACACATCTTCGTCGC	59.007	20	169	67	235	CCATGGGGGAGAAGTAGCAA	59.081	20	GAGGAACACATCTTCGTCGC	59.007	20	121	115	235	TCATGTGAAGGCTGTGTCCT	58.941	20	AACACATCTTCGTCGCCATG	58.921	20	165	67	231
scaf_0000641_4	p3	(AGG)7	21	151	171	TTAAACCAGTGACCCGTCCA	58.87	20	TGGTAGCTTCTCCTCCTCCT	58.988	20	106	76	181	TTAAACCAGTGACCCGTCCA	58.87	20	CTTCTCCTCCTCCTCCTCCT	59.066	20	100	76	175	CATCACGGTTCGATTTCGGT	58.644	20	TGGTAGCTTCTCCTCCTCCT	58.988	20	138	44	181
scaf_0000642_27	p4	(AAAT)5	20	151	170	AGAACCCTAGCTCAAACCCT	57.954	20	TGGTTTAGTTGGAAGCTGCT	57.343	20	139	72	210	AGAACCCTAGCTCAAACCCT	57.954	20	AGGTTGGTTGATTTTGAGGCA	58.323	21	195	72	266	AGAACCCTAGCTCAAACCCT	57.954	20	TTGGTTTAGTTGGAAGCTGCT	58.056	21	140	72	211
scaf_0000642_34	p3	(ATG)17	51	151	201	AACGGTTGGAGATGGCCTAA	59.011	20	AGACAAGAGGCGTCCCATTT	59.307	20	189	67	255	AACGGTTGGAGATGGCCTAA	59.011	20	AAGACAAGAGGCGTCCCATT	59.307	20	190	67	256	AACGGTTGGAGATGGCCTAA	59.011	20	ATCCCGTCGATGATCACACT	58.596	20	162	67	228
scaf_0000643_7	p3	(AAC)11	33	151	183	CAAACCCCAAGCTTCCACAA	58.881	20	TCGTGCTCCTGAGGTGATTT	59.023	20	223	11	233	TTCGCTGAACTGCATTCACC	59.126	20	TCGTGCTCCTGAGGTGATTT	59.023	20	200	34	233	CAAACCCCAAGCTTCCACAA	58.881	20	TTCCTGTTTCTCGTGCTCCT	58.951	20	233	11	243
scaf_0000644_1	p3	(CGG)6	18	151	168	ATTCAGAGGGAGCAGCCTTT	59.002	20	ATGCTGAAGAAAGCCCAAGC	59.107	20	148	117	264	TGTCACCAGCTCTGACTAGC	59.109	20	AAAGGCTGCTCCCTCTGAAT	59.002	20	137	0	136	TGTCACCAGCTCTGACTAGC	59.109	20	TCTAAAATGGCCGAGGCAGA	59.091	20	199	0	198
scaf_0000644_13	p3	(TGG)5	15	151	165	AGCATCCTTGACTCTGCCTT	59.01	20	ACAACAGTAGCAACAGCAGC	59.053	20	170	14	183	AAGCATCCTTGACTCTGCCT	59.01	20	ACAACAGTAGCAACAGCAGC	59.053	20	171	13	183	CCCCCTTTGAACAATGGTGG	59.024	20	ACAACAGTAGCAACAGCAGC	59.053	20	137	47	183
scaf_0000645_12	p3	(AAT)15	45	151	195	AGAAAAAGCACACCAAACCGA	58.904	21	TCTCCGTACAAATATTGAGGGAC	57.728	23	268	46	313	GAAAAAGCACACCAAACCGA	57.43	20	TCTCCGTACAAATATTGAGGGAC	57.728	23	267	47	313	AGAAAAAGCACACCAAACCG	57.423	20	TCTCCGTACAAATATTGAGGGAC	57.728	23	268	46	313
scaf_0000646_23	p4	(AATT)5	20	151	170	AGTCAGCATTCCTCTGGGTA	57.746	20	TCTGCCCAAAACTGCTCAAA	58.226	20	121	186	306	TAGTCAGCATTCCTCTGGGT	57.746	20	TCTGCCCAAAACTGCTCAAA	58.226	20	122	185	306	AGTCAGCATTCCTCTGGGTA	57.746	20	ATCTGCCCAAAACTGCTCAA	58	20	122	186	307
scaf_0000647_6	p3	(TCT)5	15	151	165	TCAATCTGTGAGTTGACCGTT	57.531	21	ACTGCAATCTCCCTATGTGCT	59.157	21	113	107	219	TTCAATCTGTGAGTTGACCGT	57.531	21	ACTGCAATCTCCCTATGTGCT	59.157	21	114	106	219	TCAATCTGTGAGTTGACCGTT	57.531	21	ACTGCAATCTCCCTATGTGC	57.661	20	113	107	219
scaf_0000647_10	p3	(TAT)14	42	151	192	GCGTATGCAACTAGCCTTTGA	58.993	21	TCGAGACCTCTAGCATTTGGA	58.265	21	183	57	239	AGCGTATGCAACTAGCCTTTG	58.99	21	TCGAGACCTCTAGCATTTGGA	58.265	21	184	56	239	GCGTATGCAACTAGCCTTTGA	58.993	21	TTCGAGACCTCTAGCATTTGGA	58.903	22	184	57	240
scaf_0000648_8	p3	(CTC)13	39	151	189	CTATTCTTGTCGCAAGGCCC	58.983	20	CTGTTTACGGATGCGAAGGG	58.993	20	100	232	331	CTATTCTTGTCGCAAGGCCC	58.983	20	CCTGTTTACGGATGCGAAGG	58.993	20	101	232	332	ACCCCTCCTAATGAGTCCCT	58.972	20	GGGCCTTGCGACAAGAATAG	58.983	20	214	38	251
scaf_0000648_11	p4	(GTTT)7	28	151	178	ATGTTTGGGATGTGCGTTCC	59.112	20	ATGTCGCAACATCCACACAC	59.126	20	128	12	139	ATGTTTGGGATGTGCGTTCC	59.112	20	ACATGTCGCAACATCCACAC	59.126	20	130	12	141	ATGTTTGGGATGTGCGTTCC	59.112	20	ACACATGTCGCAACATCCAC	59.126	20	132	12	143
scaf_0000648_18	p3	(GAA)5	15	335	349	CTCGTAACAACTCGCTCAGC	59.014	20	CCTTGTAGCCCCATACACCA	59.084	20	103	29	131	CTCGTAACAACTCGCTCAGC	59.014	20	AAACCAGCACAACTGTCACC	58.897	20	124	29	152	ATCTAGGGGTTGTGGTGGTG	59.008	20	TGTAACACTGACCACCACCA	58.795	20	121	97	217
scaf_0000648_19	p3	(GGT)7	21	4	24	TGGTGGTGGTCAGTGTTACA	58.795	20	TCACTACCAAATGTGAGCTTCT	57.376	22	169	14	182	TGGTGGTGGTCAGTGTTACA	58.795	20	TCTTCACTACCAAATGTGAGCT	57.376	22	172	14	185	GTGGTGGTCAGTGTTACACG	58.786	20	TCACTACCAAATGTGAGCTTCT	57.376	22	167	16	182
scaf_0000648_19	p3	(GAA)5	15	151	165	TGGTGGTGGTCAGTGTTACA	58.795	20	TCACTACCAAATGTGAGCTTCT	57.376	22	169	14	182	TGGTGGTGGTCAGTGTTACA	58.795	20	TCTTCACTACCAAATGTGAGCT	57.376	22	172	14	185	GTGGTGGTCAGTGTTACACG	58.786	20	TCACTACCAAATGTGAGCTTCT	57.376	22	167	16	182
scaf_0000649_2	p3	(TGC)7	21	151	171	AATCTCAGCATCGTTGTCGC	58.998	20	GGCAGTACCTCCTCTAGCAG	58.963	20	148	0	147	AATCTCAGCATCGTTGTCGC	58.998	20	GGAGAGAGAGGTAGGTCCCA	59.072	20	122	0	121	GCTCAAAATGGGCTCTGAGG	58.899	20	GGCAGTACCTCCTCTAGCAG	58.963	20	130	18	147
scaf_0000653_4	p4	(CATA)6	24	151	174	AGGCGATTGTCGAATTTTGAGA	58.665	22	GGGTCGAGTCTAAACCGGAA	59.109	20	256	4	259	AGAGGCGATTGTCGAATTTTGA	58.665	22	GGGTCGAGTCTAAACCGGAA	59.109	20	258	2	259	GAGGCGATTGTCGAATTTTGAG	58.326	22	GGGTCGAGTCTAAACCGGAA	59.109	20	257	3	259
scaf_0000655_7	p3	(ACC)6	18	151	168	ACCTAGTAGACGAGGCCAGA	59.082	20	CTGGTACTCGTCTGCCCTAG	58.974	20	227	89	315	TAGACGAGGCCAGAACAAGG	59.104	20	CTGGTACTCGTCTGCCCTAG	58.974	20	221	95	315	TGAGGATGGGCATCTGACTC	58.874	20	TCTGGCCTCGTCTACTAGGT	59.082	20	100	9	108
scaf_0000655_8	p3	(CTT)10	30	151	180	GGCACTCTTGGAGACCTCAT	59.092	20	TGGTTGGATGGCTGCTCTAA	59.009	20	262	40	301	GGCACTCTTGGAGACCTCAT	59.092	20	TTGGTTGGATGGCTGCTCTA	59.009	20	263	40	302	GGCACTCTTGGAGACCTCAT	59.092	20	TCGAGATGAGGACCGACTTG	58.904	20	211	40	250
scaf_0000655_11	p3	(CCA)7	21	151	171	CCACCACCATCACCATCTCT	59.085	20	CTAGTGGTGAAACGGCGATG	59.001	20	127	162	288	CCACCACCATCACCATCTCT	59.085	20	TGCTGGTGGTTGAGATGCTA	59.017	20	144	162	305	CCACCACCATCACCATCTCT	59.085	20	GAATGGTGCTGGTGGTTGAG	59.116	20	150	162	311
scaf_0000658_15	p4	(TTTA)5	20	151	170	GCCTTTTAATGGCCGAAGCT	59.182	20	TGAGATCCCCACCTCATGTT	58.029	20	169	24	192	GCCTTTTAATGGCCGAAGCT	59.182	20	TTGAGATCCCCACCTCATGT	58.029	20	170	24	193	GCCTTTTAATGGCCGAAGCT	59.182	20	AGATCCCCACCTCATGTTTGA	58.722	21	167	24	190
scaf_0000660_4	p3	(ACA)6	18	151	168	GCAGGTTAAAGGCCTTTGCT	59.031	20	GGTTTGGGTCGTGACACTTC	59.058	20	112	86	197	GCAGGTTAAAGGCCTTTGCT	59.031	20	TAAACCTTTAGGGGCGGGTT	58.925	20	128	86	213	GCAGGTTAAAGGCCTTTGCT	59.031	20	TTAAACCTTTAGGGGCGGGT	58.925	20	129	86	214
scaf_0000661_1	p3	(CCA)6	18	151	168	TCCTCCACCAATAGCCCAAA	58.622	20	ATGATGATGGTGGTGGTGGT	58.998	20	132	43	174	TCCTCCACCAATAGCCCAAA	58.622	20	GGTGGTGGTGGAGTTGGATA	59.011	20	118	43	160	ATCCTCCACCAATAGCCCAA	58.393	20	ATGATGATGGTGGTGGTGGT	58.998	20	133	42	174
scaf_0000661_3	p3	(ACA)8	24	151	174	TGGCAGAGGCTTTTAGACGA	59.026	20	AGTTCGGTCGTTACCTTGGT	58.957	20	119	131	249	TGGCAGAGGCTTTTAGACGA	59.026	20	GTTCGGTCGTTACCTTGGTG	58.858	20	118	131	248	GGCAGAGGCTTTTAGACGAC	58.639	20	AGTTCGGTCGTTACCTTGGT	58.957	20	118	132	249
scaf_0000661_10	p3	(TCT)9	27	151	177	CTTGGCTTCCTTGGTCGAAG	58.84	20	AAGATAAGAGCCACGCCTCC	59.534	20	202	101	302	CTTGGCTTCCTTGGTCGAAG	58.84	20	CACACCCCTCCTCAACCATT	59.594	20	182	101	282	CCTTTGCTTCTTCCCCCTCT	59.299	20	AAGATAAGAGCCACGCCTCC	59.534	20	182	121	302
scaf_0000663_24	p3	(CAC)7	21	14	34	ACCACCACTACTAGCACCAC	59.026	20	GCATTGGTGGCATGGTAGAG	58.973	20	126	26	151	ACCACCACCACTACTAGCAC	59.026	20	GCATTGGTGGCATGGTAGAG	58.973	20	129	23	151	CACCACCACTACTAGCACCA	59.026	20	GCATTGGTGGCATGGTAGAG	58.973	20	127	25	151
scaf_0000664_13	p3	(GTT)9	27	151	177	TTGGTGCTCGAGTTTTTGCA	58.901	20	CTGCGCCAAGATTACGACTC	59.076	20	206	57	262	TGGTGCTCGAGTTTTTGCAT	58.682	20	CTGCGCCAAGATTACGACTC	59.076	20	205	58	262	TTGGTGCTCGAGTTTTTGCA	58.901	20	GCGCCAAGATTACGACTCAA	58.644	20	204	57	260
scaf_0000664_14	p3	(TGT)5	15	1	15	GTTGTTGTTGTTGTTGATGGTG	57.161	22	CTGCGCCAAGATTACGACTC	59.076	20	101	1	101	GTTGTTGTTGTTGTTGATGGTG	57.161	22	TCTGCGCCAAGATTACGACT	59.469	20	102	1	102	GTTGTTGTTGTTGTTGATGGTG	57.161	22	ATCTGCGCCAAGATTACGAC	58.428	20	103	1	103
scaf_0000665_14	p3	(CAC)5	15	151	165	ACCACCACCACAACCACTAT	58.854	20	GATGGTGGATGGATGGGTGA	59.154	20	116	92	207	ACCACCACCACAACCACTAT	58.854	20	GATGGTAGCGAGTGAGTGGT	59.182	20	209	92	300	ACCACCACCACAACCACTAT	58.854	20	GTGGATGGTAGCGAGTGAGT	59.182	20	212	92	303
scaf_0000665_14	p3	(CCA)6	18	268	285	ACCACCACCACAACCACTAT	58.854	20	GATGGTGGATGGATGGGTGA	59.154	20	116	92	207	ACCACCACCACAACCACTAT	58.854	20	GATGGTAGCGAGTGAGTGGT	59.182	20	209	92	300	ACCACCACCACAACCACTAT	58.854	20	GTGGATGGTAGCGAGTGAGT	59.182	20	212	92	303
scaf_0000665_15	p3	(CAC)5	15	34	48	TCACCCATCCATCCACCATC	59.154	20	GATGGTAGCGAGTGAGTGGT	59.182	20	113	71	183	TCACCCATCCATCCACCATC	59.154	20	GTGGATGGTAGCGAGTGAGT	59.182	20	116	71	186	TCACCCATCCATCCACCATC	59.154	20	TGGATGGTAGCGAGTGAGTG	59.182	20	115	71	185
scaf_0000665_15	p3	(CCA)6	18	151	168	TCACCCATCCATCCACCATC	59.154	20	GATGGTAGCGAGTGAGTGGT	59.182	20	113	71	183	TCACCCATCCATCCACCATC	59.154	20	GTGGATGGTAGCGAGTGAGT	59.182	20	116	71	186	TCACCCATCCATCCACCATC	59.154	20	TGGATGGTAGCGAGTGAGTG	59.182	20	115	71	185
scaf_0000666_7	p3	(TTA)5	15	151	165	AATGAGGGGGCATTGTTGAC	58.439	20	AATGTGGCCAAGGTTACTCTT	57.474	21	130	21	150	AATGAGGGGGCATTGTTGAC	58.439	20	AAATGTGGCCAAGGTTACTCT	57.474	21	131	21	151	GCATTGTTGACGCCACATTT	58.218	20	AATGTGGCCAAGGTTACTCTT	57.474	21	121	30	150
scaf_0000667_2	p4	(TTAT)6	24	151	174	TTCTCATCAAAGTTGCGGCC	59.119	20	CAAACATGCCATACCAATACCA	57.001	22	118	105	222	CCCATCCATCGCCCTAGTTT	59.526	20	CAAACATGCCATACCAATACCA	57.001	22	162	61	222	CTCATCAAAGTTGCGGCCTA	58.262	20	CAAACATGCCATACCAATACCA	57.001	22	116	107	222
scaf_0000667_19	p3	(TGG)11	33	151	183	TGCATTCGTCGCACTTGTAC	59.212	20	CTCTCTGGCCTATCCACTCG	59.042	20	130	109	238	ACCAGTGGAAGAGCTCTGTG	59.316	20	CTCTCTGGCCTATCCACTCG	59.042	20	160	79	238	AGAGGAAGAGGCATTGGTGG	59.377	20	CTCTCTGGCCTATCCACTCG	59.042	20	103	136	238
scaf_0000667_20	p3	(CCT)11	33	151	183	CTTGTAAGGGCCTCCTCCTC	59.166	20	AGCCAAACTCCGGGATTGTA	59.011	20	158	140	297	CTCCTCCTCCTCCTCCTAGG	59.223	20	AGCCAAACTCCGGGATTGTA	59.011	20	132	166	297	CCTCCTCCTCCTCCTCCTAG	59.223	20	AGCCAAACTCCGGGATTGTA	59.011	20	133	165	297
scaf_0000667_22	p4	(TTAT)6	24	151	174	AATGACTTAGACCCGCCAGT	58.723	20	TTTCCTTGTGCTTTCGGTGG	58.971	20	180	91	270	CGGGGATCATTGGTGATTGG	58.679	20	TTTCCTTGTGCTTTCGGTGG	58.971	20	152	119	270	CCGGGGATCATTGGTGATTG	58.679	20	TTTCCTTGTGCTTTCGGTGG	58.971	20	153	118	270
scaf_0000667_25	p3	(ACA)6	18	151	168	ATCTCTCCGCCAAGCTTGAT	59.164	20	TGTTGTTGTTGTTGTGGCCA	59.031	20	136	29	164	TCTCTCCGCCAAGCTTGATA	58.515	20	TGTTGTTGTTGTTGTGGCCA	59.031	20	135	30	164	GCTCAAACTGGGTGTAGACC	58.19	20	TGTTGTTGTTGTTGTGGCCA	59.031	20	115	50	164
scaf_0000667_26	p3	(GAA)6	18	151	168	AAGAAGAAGCACCTCCAGCT	58.937	20	GGTTTTTGTCGTCTGGGCAT	59.041	20	107	160	266	AAGAAGAAGCACCTCCAGCT	58.937	20	TTTTTGTCGTCTGGGCATGG	59.042	20	105	160	264	CCTCCTCCTTTGGAAGCTGA	59.013	20	TATTCATGCTCATGGCCCCT	58.848	20	127	183	309
scaf_0000670_5	p3	(GCA)11	33	268	300	ACGGAAAATTCACGTGCGC	60.082	19	GAGGATTTGCTGGGGGATCT	59.151	20	100	163	262	ACGGAAAATTCACGTGCGCA	61.777	20	GAGGATTTGCTGGGGGATCT	59.151	20	100	163	262	CGGAAAATTCACGTGCGCAG	61.06	20	GGAGGATTTGCTGGGGGAT	59.066	19	100	164	263
scaf_0000670_6	p3	(GCA)11	33	151	183	AGATCCCCCAGCAAATCCTC	59.151	20	GCTGCTGGTATTCTGTCTGG	58.339	20	155	126	280	GAGATCCCCCAGCAAATCCT	59.151	20	GCTGCTGGTATTCTGTCTGG	58.339	20	156	125	280	CGCAAAGCAGAAGAGATGGG	59.269	20	GCTGCTGGTATTCTGTCTGG	58.339	20	175	106	280
scaf_0000671_4	p3	(GAA)5	15	151	165	GGTGAGTTTTGGTGAGGTGG	58.681	20	TAACCAAATGATCGCGCGAG	59.072	20	204	111	314	GGTGAGTTTTGGTGAGGTGG	58.681	20	GCTGTCACCCAAAATCAGCT	58.749	20	185	111	295	GGTGAGTTTTGGTGAGGTGG	58.681	20	CGAGCTGTCACCCAAAATCA	58.477	20	188	111	298
scaf_0000672_24	p4	(TTTA)5	20	151	170	AACTACGAGATCCCTGCTGG	58.885	20	TGGACTTCTTAACTCTCCAACCA	59.029	23	120	100	219	TCACCCTACATGCATGGTCA	58.716	20	TGGACTTCTTAACTCTCCAACCA	59.029	23	170	50	219	AACTACGAGATCCCTGCTGG	58.885	20	GGACTTCTTAACTCTCCAACCA	57.381	22	119	100	218
scaf_0000673_1	p3	(GTC)5	15	151	165	ACCACTCGCTGTAACTTCCA	58.955	20	CGGAGGTTCTTCTACTGCCA	59.104	20	205	0	204	GCCTCAGCAGTTGGTTCTTC	59.122	20	CGGAGGTTCTTCTACTGCCA	59.104	20	138	67	204	AGCAGGGGAGACTTGTTTGT	59.153	20	CGGAGGTTCTTCTACTGCCA	59.104	20	184	21	204
scaf_0000673_15	p3	(GTG)5	15	151	165	TTAGTGGTGGTGGTGGTGTT	59.08	20	TACCGCTACAACCATCGCTA	58.608	20	116	147	262	ATTAGTGGTGGTGGTGGTGT	58.854	20	TACCGCTACAACCATCGCTA	58.608	20	117	146	262	GGTGGTGTTGGTGTTGGTAG	58.685	20	TACCGCTACAACCATCGCTA	58.608	20	105	158	262
scaf_0000673_16	p3	(AAT)7	21	276	296	ACTCACATTGGCTGAGGTCA	58.941	20	TGTTTGTGCATGCCGTACAA	58.975	20	146	65	210	TCACTCACATTGGCTGAGGT	58.941	20	TGTTTGTGCATGCCGTACAA	58.975	20	148	63	210	ACTCACATTGGCTGAGGTCA	58.941	20	TGTGCATGCCGTACAATGAG	58.914	20	142	65	206
scaf_0000673_17	p3	(AAT)7	21	151	171	TTGTACGGCATGCACAAACA	58.975	20	GGGCCATTTGTTATCAATTGCA	58.129	22	211	66	276	TTGTACGGCATGCACAAACA	58.975	20	TGGGCCATTTGTTATCAATTGC	58.129	22	212	66	277	CTCATTGTACGGCATGCACA	58.914	20	GGGCCATTTGTTATCAATTGCA	58.129	22	215	62	276
scaf_0000674_1	p3	(CTC)5	15	266	280	AAATCCACAAACCCAACTTCCA	58.621	22	CCACCAACAACGCCTTTTCC	60.249	20	100	157	256	AATCCACAAACCCAACTTCCA	57.961	21	GCCACCAACAACGCCTTTT	59.857	19	100	158	257	AATCCACAAACCCAACTTCCA	57.961	21	GCCACCAACAACGCCTTTTC	60.874	20	100	158	257
scaf_0000674_2	p3	(CTC)5	15	151	165	TGCCAAGAATGGGAAAAGGC	59.024	20	TCACAGACTTCATCCCAGCC	59.385	20	113	111	223	CCAAGAATGGGAAAAGGCGT	58.743	20	TCACAGACTTCATCCCAGCC	59.385	20	111	113	223	ATGGGAAAAGGCGTTGTTGG	59.321	20	TCACAGACTTCATCCCAGCC	59.385	20	105	119	223
scaf_0000674_5	p4	(CCTC)8	32	151	182	TCCCTCCCTCCCTCTTACAA	58.901	20	TTTCTCTGTTGTGGTCCGGT	59.165	20	116	168	283	CTCCCTCCCTCCCTCTTACA	59.363	20	TTTCTCTGTTGTGGTCCGGT	59.165	20	117	167	283	AAGACACGACTCGACTCGTC	59.488	20	ACAAGCGAGGAAAACGTGTC	59.065	20	113	113	225
scaf_0000674_6	p3	(CAC)5	15	151	165	ACACGTTTTCCTCGCTTGTC	59.065	20	GGTGGTGTTGGAGTGGTCTA	58.947	20	150	7	156	GACACGTTTTCCTCGCTTGT	59.065	20	GGTGGTGTTGGAGTGGTCTA	58.947	20	151	6	156	TGTCTGTCTGCAGGTACGTT	58.963	20	CAAACCCAAACCCAAACCCA	59.088	20	100	213	312
scaf_0000674_7	p3	(CAC)5	15	23	37	TGTCTGTCTGCAGGTACGTT	58.963	20	ACCCAAACCCAAACCCAAAC	59.087	20	103	85	187	TGTCTGTCTGCAGGTACGTT	58.963	20	CAAACCCAAACCCAAACCCA	59.088	20	100	85	184	TGTCTGTCTGCAGGTACGTT	58.963	20	CAAACCCAAACCCAAACCCA	59.088	20	106	85	190
scaf_0000674_17	p3	(AAG)6	18	151	168	AGTGCAATGCAAGCTTCCTT	58.665	20	CTCCCTCCCCCGATTCTTTT	59.08	20	237	57	293	AAGTGCAATGCAAGCTTCCT	58.665	20	CTCCCTCCCCCGATTCTTTT	59.08	20	238	56	293	AGTGCAATGCAAGCTTCCTT	58.665	20	TCCCTCCCCCGATTCTTTTT	58.621	20	236	57	292
scaf_0000678_6	p4	(GGAT)5	20	151	170	CGGATGGATGGATGGATGGA	59.013	20	TGGTTGCATCATGTGAAGGC	59.11	20	113	149	261	ATGGACTGGGCGCTAACATA	58.872	20	TCCATCCATCCATCCATCCG	59.013	20	163	6	168	AAATAGATGGACTGGGCGCT	59.16	20	TCCATCCATCCATCCATCCG	59.013	20	169	0	168
scaf_0000679_13	p3	(GGT)11	33	151	183	GACGACGATGATGGTTGTGG	59.001	20	CCACCACCTCATCTTCCACT	59.013	20	124	85	208	GGTGACGACGATGATGGTTG	59.001	20	CCACCACCTCATCTTCCACT	59.013	20	127	82	208	GGTAATGGAGTAGCGGTGGA	58.883	20	CCACCACCTCATCTTCCACT	59.013	20	141	17	157
scaf_0000680_17	p3	(TTG)7	21	151	171	CTTGTTGCTCCTCTGCTCAC	58.845	20	TGATGATGCCAGGAGGGAAA	58.702	20	100	3	102	CTTGTTGCTCCTCTGCTCAC	58.845	20	TTGATGATGCCAGGAGGGAA	58.702	20	101	3	103	CACTTGTTGCTCCTCTGCTC	58.845	20	TGATGATGCCAGGAGGGAAA	58.702	20	102	1	102
scaf_0000685_4	p4	(AAAT)5	20	151	170	AGGGCTTTGTATCGAGCTCA	58.805	20	AAAATGAGACCACGTGGCAC	59.048	20	134	7	140	GTGCCACGTGGTCTCATTTT	59.048	20	CCTCCAACCAAACACAGCAT	58.669	20	161	121	281	AGGGCTTTGTATCGAGCTCA	58.805	20	CCTCCAACCAAACACAGCAT	58.669	20	275	7	281
scaf_0000686_9	p3	(TCA)5	15	151	165	TCAGAATGGGCTCTGAAGGG	59.085	20	AGTGCCTCTTCCAGCAGTAG	59.099	20	107	166	272	TCAGAATGGGCTCTGAAGGG	59.085	20	CTTCCAGCAGTAGGGAGGAG	58.881	20	100	166	265	TCAGAATGGGCTCTGAAGGG	59.085	20	CTCTTCCAGCAGTAGGGAGG	58.881	20	102	166	267
scaf_0000686_10	p3	(CAA)5	15	151	165	AGCTTGGAGTACTAGGTGAGT	57.54	21	ACGTTTGCACCATTTGTTGT	57.336	20	127	51	177	AGCTTGGAGTACTAGGTGAGTT	58.219	22	ACGTTTGCACCATTTGTTGT	57.336	20	127	51	177	AGCTTGGAGTACTAGGTGAGT	57.54	21	ACTGATGTAAACGTTTGCACCA	59.054	22	137	51	187
scaf_0000687_1	p3	(CCA)5	15	151	165	AACAGACTGATCAAGCCCCA	58.933	20	CCTCTCCAGGGGCTACAAAA	59.008	20	156	133	288	AACAGACTGATCAAGCCCCA	58.933	20	GCTACACTAGCCCTCTCCAG	58.963	20	167	133	299	GCTTCTCTTGAAACCCTGGC	59.115	20	CCTCTCCAGGGGCTACAAAA	59.008	20	211	78	288
scaf_0000687_8	p4	(TTTA)6	24	151	174	TGAGAGCCATCCCTTGCTTT	59.299	20	GTGTCACACACTCGACTTGA	57.796	20	182	123	304	TTGAGAGCCATCCCTTGCTT	59.299	20	GTGTCACACACTCGACTTGA	57.796	20	183	122	304	TTTGAGAGCCATCCCTTGCT	59.299	20	GTGTCACACACTCGACTTGA	57.796	20	184	121	304
scaf_0000688_5	p3	(AAT)7	21	151	171	TAATCACGGACCTCCACCAC	59.1	20	CTTTTCGGTACCAGCTACGC	59.003	20	104	182	285	TTTCGCCTAATCACGGACCT	59.1	20	CTTTTCGGTACCAGCTACGC	59.003	20	111	175	285	TAATCACGGACCTCCACCAC	59.1	20	GGTAAGGTACATGGGGCCTT	59.076	20	127	182	308
scaf_0000689_8	p3	(TGA)5	15	151	165	TAGGAGGCCATGAAGAACGG	59.169	20	GCTTGAGGGTCCTGAGGATT	59.085	20	269	40	308	TAGGAGGCCATGAAGAACGG	59.169	20	TAACGCTTGAGGGTCCTGAG	59.104	20	273	40	312	TAGGAGGCCATGAAGAACGG	59.169	20	CTAACGCTTGAGGGTCCTGA	59.104	20	274	40	313
scaf_0000691_8	p3	(TTA)5	15	151	165	GTGCAAACTTGGCTCATCCA	59.039	20	AGCCCCAACTGATGATCCAA	58.998	20	200	70	269	TGTGCAAACTTGGCTCATCC	59.039	20	AGCCCCAACTGATGATCCAA	58.998	20	201	69	269	GTGCAAACTTGGCTCATCCA	59.039	20	ATAAGCAAAACACCAGCCCC	58.734	20	214	70	283
scaf_0000691_13	p3	(GGT)5	15	151	165	AGTGATGTTGTTAGTGGGGGT	58.937	21	ATGGACCAATGCCACTACAC	57.871	20	100	123	222	TAGTGATGTTGTTAGTGGGGGT	58.747	22	TGGACCAATGCCACTACACT	58.936	20	100	122	221	AGTGATGTTGTTAGTGGGGGT	58.937	21	ATGGACCAATGCCACTACACT	59.365	21	100	123	222
scaf_0000693_4	p3	(GAA)5	15	151	165	CCTGGTGGTGGTGGTGATAT	59.081	20	AGTGTAGTTGGTGGTGGTGG	59.528	20	116	186	301	CCTGGTGGTGGTGGTGATAT	59.081	20	GTGTAGTTGGTGGTGGTGGT	59.818	20	115	186	300	CCTGGTGGTGGTGGTGATAT	59.081	20	TGTAGTTGGTGGTGGTGGTG	59.818	20	114	186	299
scaf_0000693_4	p3	(ACC)6	18	276	293	CCTGGTGGTGGTGGTGATAT	59.081	20	AGTGTAGTTGGTGGTGGTGG	59.528	20	116	186	301	CCTGGTGGTGGTGGTGATAT	59.081	20	GTGTAGTTGGTGGTGGTGGT	59.818	20	115	186	300	CCTGGTGGTGGTGGTGATAT	59.081	20	TGTAGTTGGTGGTGGTGGTG	59.818	20	114	186	299
scaf_0000693_5	p3	(GAA)5	15	26	40	CCTGGTGGTGGTGGTGATAT	59.081	20	CTAGGGATCACCACCACAGG	59.167	20	143	61	203	CCTGGTGGTGGTGGTGATAT	59.081	20	CCTAGGGATCACCACCACAG	59.167	20	144	61	204	ACTTTCTTGGCCTCCCTCTC	59.012	20	GGGTCACCAGTAGTAGGCAA	58.727	20	196	113	308
scaf_0000693_5	p3	(ACC)6	18	151	168	CCTGGTGGTGGTGGTGATAT	59.081	20	CTAGGGATCACCACCACAGG	59.167	20	143	61	203	CCTGGTGGTGGTGGTGATAT	59.081	20	CCTAGGGATCACCACCACAG	59.167	20	144	61	204	ACTTTCTTGGCCTCCCTCTC	59.012	20	GGGTCACCAGTAGTAGGCAA	58.727	20	196	113	308
scaf_0000695_16	p3	(AAT)5	15	151	165	ACAGCAAACTAGGGGACATCT	58.73	21	TGGGTGCTCTGTTTTGGTTG	58.89	20	230	31	260	ACAGCAAACTAGGGGACATCT	58.73	21	GGGTGCTCTGTTTTGGTTGA	58.601	20	229	31	259	ACAGCAAACTAGGGGACATCT	58.73	21	CTGGGTGCTCTGTTTTGGTT	58.597	20	231	31	261
scaf_0000696_2	p4	(TTTG)6	24	151	174	GACCCTGCCCGAAGAAAAAG	59.118	20	GCACGTGTGTTGTCTATTGGA	58.86	21	228	28	255	GACCCTGCCCGAAGAAAAAG	59.118	20	AGCACGTGTGTTGTCTATTGG	58.857	21	229	28	256	ACCCTGCCCGAAGAAAAAGA	59.523	20	GCACGTGTGTTGTCTATTGGA	58.86	21	227	29	255
scaf_0000696_4	p3	(AAT)6	18	151	168	CTTGAAACCCTGGACTCTGG	57.809	20	GCTATGCCGTGGAAGGAAAG	58.983	20	103	33	135	TCTTGAAACCCTGGACTCTGG	59.3	21	GCTATGCCGTGGAAGGAAAG	58.983	20	104	32	135	CTTGAAACCCTGGACTCTGG	57.809	20	TATGCCGTGGAAGGAAAGGA	58.719	20	101	33	133
scaf_0000696_18	p3	(ATT)10	30	151	180	ACTACCACTCTTGTGTCTCGT	58.416	21	TCTCGAGACATAACCCAAGTCT	58.302	22	147	75	221	AACTACCACTCTTGTGTCTCGT	59.043	22	TCTCGAGACATAACCCAAGTCT	58.302	22	148	74	221	ACTACCACTCTTGTGTCTCGT	58.416	21	ATCTCGAGACATAACCCAAGTCT	58.718	23	148	75	222
scaf_0000696_30	p3	(AAT)7	21	151	171	CCCGTAACCTCCACTCACTT	59.026	20	ACCACCCCACAGTGATGTG	59.544	19	104	104	207	CCCGTAACCTCCACTCACTT	59.026	20	CACCACCCCACAGTGATGT	59.544	19	105	104	208	CCCACAAAATATCGCTCCCG	59.056	20	ACCACCCCACAGTGATGTG	59.544	19	120	88	207
scaf_0000697_6	p3	(ATT)5	15	151	165	CACGCTGCTTTACTAACCCG	59.281	20	AGCCATTTCCTCCAGTGTCT	58.634	20	224	67	290	ACTAACCCGCCCCTTTAACT	58.635	20	AGCCATTTCCTCCAGTGTCT	58.634	20	213	78	290	TAACCCGCCCCTTTAACTCC	59.38	20	AGCCATTTCCTCCAGTGTCT	58.634	20	211	80	290
scaf_0000699_1	p3	(CAT)5	15	151	165	TTTCACGGGCTAAGGTTCCT	58.938	20	TGATGATGATGGTGGAGTCAGA	58.622	22	155	6	160	ACGGGCTAAGGTTCCTATGG	58.871	20	TGATGATGATGGTGGAGTCAGA	58.622	22	151	10	160	GGCTAAGGTTCCTATGGCCT	58.859	20	TGATGATGATGGTGGAGTCAGA	58.622	22	148	13	160
scaf_0000700_18	p4	(AGAA)5	20	151	170	GCTAAAGATTCAGGCAGCTCA	58.363	21	GCATACCCACTTGTGATTGCT	58.905	21	104	20	123	GCTAAAGATTCAGGCAGCTCA	58.363	21	AGCATACCCACTTGTGATTGC	58.905	21	105	20	124	AATCTGGCGGCATTCTTGTG	59.187	20	AGCTTTCATGATTGTTGGCAAC	58.343	22	134	76	209
scaf_0000701_15	p4	(AAAT)5	20	151	170	CCCAAACCTTGTACGAAGCA	58.4	20	TTCTCCAAACTTGCCATGCC	59.032	20	232	50	281	CCCAAACCTTGTACGAAGCA	58.4	20	AGGGCTTGCTGGCTATTACA	59.081	20	269	50	318	CCCAAACCTTGTACGAAGCA	58.4	20	CTCCAAACTTGCCATGCCAT	59.1	20	230	50	279
scaf_0000702_1	p3	(ATC)11	33	151	183	TGTATCGTCGCCGTACTGAA	58.914	20	ATCTTCGCTTCGGCTTCTCT	59.179	20	110	22	131	TGTATCGTCGCCGTACTGAA	58.914	20	GATCTTCGCTTCGGCTTCTC	58.795	20	111	22	132	CGTCGCCGTACTGAATCATC	58.879	20	ATCTTCGCTTCGGCTTCTCT	59.179	20	105	27	131
scaf_0000703_2	p3	(AAT)11	33	151	183	AATCGGCCTGCACTTTTCTC	58.831	20	AGCCTCACAAGCCACAGATA	58.721	20	202	14	215	GGCCTGCACTTTTCTCTGTT	58.678	20	AGCCTCACAAGCCACAGATA	58.721	20	198	18	215	TTATCCAAATCGGCCTGCAC	58.611	20	AGCCTCACAAGCCACAGATA	58.721	20	209	7	215
scaf_0000704_2	p3	(AAT)5	15	151	165	TCTGGCTGCGAATCTAGTGA	58.526	20	AGGCACATGGTTCTCGGTTA	59.019	20	103	99	201	TCTGGCTGCGAATCTAGTGA	58.526	20	GAAAGGCACATGGTTCTCGG	59.195	20	106	99	204	TCTGGCTGCGAATCTAGTGA	58.526	20	TGAAAGGCACATGGTTCTCG	58.477	20	107	99	205
scaf_0000704_14	p3	(AAT)5	15	151	165	AAACCGGGCGAAGTGGATA	59.015	19	TGAAAACGGGAACTTGCAAGT	58.904	21	117	3	119	AAACCGGGCGAAGTGGATA	59.015	19	ACTTGAAAACGGGAACTTGCA	58.904	21	120	3	122	AAACCGGGCGAAGTGGATAG	60.108	20	TGAAAACGGGAACTTGCAAGT	58.904	21	117	3	119
scaf_0000704_19	p4	(GTGA)5	20	151	170	AGGGTTGGGACATCGGAATT	59	20	AGAAGCTCCGGTGTTGGAAT	59.307	20	112	180	291	CATAGGGTTGGGACATCGGA	58.872	20	AGAAGCTCCGGTGTTGGAAT	59.307	20	115	177	291	TCATAGGGTTGGGACATCGG	58.872	20	AGAAGCTCCGGTGTTGGAAT	59.307	20	116	176	291
scaf_0000706_1	p3	(AAT)14	42	151	192	GCCGATCAAAAATGGGGTCT	58.526	20	TTCCTTTCAGCAAGCACCAA	58.226	20	239	4	242	GCCGATCAAAAATGGGGTCT	58.526	20	TTTCCTTTCAGCAAGCACCA	58.226	20	240	4	243	AGCCGATCAAAAATGGGGTC	58.526	20	TTCCTTTCAGCAAGCACCAA	58.226	20	240	3	242
scaf_0000708_19	p4	(ATAG)7	28	151	178	TTGGAGCTCCCACAAGACTT	58.86	20	ACTTCTCCCATACACTGTGGT	58.379	21	208	101	308	AACTTGGAGCTCCCACAAGA	58.86	20	ACTTCTCCCATACACTGTGGT	58.379	21	211	98	308	GATTGGCAACTTGGAGCTCC	59.186	20	ACTTCTCCCATACACTGTGGT	58.379	21	218	91	308
scaf_0000709_8	p3	(CCA)7	21	151	171	CAATGTCATTAGCACCGCCA	58.906	20	TGAAGGTGAACGTGGTGGTA	58.879	20	126	4	129	AATGTCATTAGCACCGCCAC	58.905	20	TGAAGGTGAACGTGGTGGTA	58.879	20	125	5	129	TGTCATTAGCACCGCCACTA	59.101	20	TGAAGGTGAACGTGGTGGTA	58.879	20	123	7	129
scaf_0000709_13	p3	(ACA)5	15	151	165	TCTATCGCCTGCTGCCATAA	58.952	20	GCTTGATGGGGTTGAAATTGC	58.65	21	115	120	234	TTCTATCGCCTGCTGCCATA	58.952	20	GCTTGATGGGGTTGAAATTGC	58.65	21	116	119	234	GAGCATCTCCAATGGTGTGC	59.263	20	GCTTGATGGGGTTGAAATTGC	58.65	21	150	85	234
scaf_0000709_16	p3	(TTA)7	21	151	171	TTTCGCGAACCCTTGGATTC	58.838	20	TCTTGAAGTTGGAGAGGGGG	58.638	20	114	182	295	TCGCGAACCCTTGGATTCTA	58.812	20	TCTTGAAGTTGGAGAGGGGG	58.638	20	112	184	295	TTTTCGCGAACCCTTGGATT	58.388	20	TCTTGAAGTTGGAGAGGGGG	58.638	20	115	181	295
scaf_0000710_5	p3	(TTA)5	15	151	165	ACATGCGGTGTCTCACAATC	58.557	20	AGGTACGTCAAGTTTGGGGA	58.573	20	225	61	285	ACATGCGGTGTCTCACAATC	58.557	20	GGTACGTCAAGTTTGGGGAC	58.484	20	224	61	284	AAACATGCGGTGTCTCACAA	58.326	20	AGGTACGTCAAGTTTGGGGA	58.573	20	227	59	285
scaf_0000710_8	p3	(TTA)6	18	151	168	ACGGTGTCTCACAATCTATTTCC	58.495	23	AGCTTAATCTGTGACATCCGAA	57.528	22	190	63	252	AACATACGGTGTCTCACAATCT	57.463	22	AGCTTAATCTGTGACATCCGAA	57.528	22	195	58	252	CGGTGTCTCACAATCTATTTCCT	58.24	23	AGCTTAATCTGTGACATCCGAA	57.528	22	189	64	252
scaf_0000711_10	p3	(GAT)5	15	151	165	CACAGGTGATCATGCAGCAG	59.267	20	TGTGATCAGTGGTCACCTGT	58.576	20	100	122	221	CACAGGTGATCATGCAGCAG	59.267	20	ATGTGATCAGTGGTCACCTGT	59.019	21	101	122	222	GGTGATCATGCAGCAGTTGT	58.829	20	TGTCATGCTTCTCATCCGTCT	59.173	21	127	126	252
scaf_0000711_16	p3	(ATT)5	15	151	165	CTACAGCCATTGTCATCGCC	59.06	20	CATGGTAGCGTTGATGGTGG	58.983	20	114	98	211	CCACCATCAACGCTACCATG	58.983	20	ACTGCTTCTCGCCTCAAGAT	59.099	20	107	192	298	GCCACCACCACTACTACCTT	59.018	20	ACTGCTTCTCGCCTCAAGAT	59.099	20	176	123	298
scaf_0000711_18	p3	(TTA)7	21	151	171	ACGTCAGTAGCATTGGGACA	59.026	20	TTGTTTGGGCGAGAAGGTTG	58.971	20	114	202	315	GCAGCAGCACTATTGAGCTT	58.907	20	TGTCCCAATGCTACTGACGT	59.026	20	107	115	221	GCAGCAGCACTATTGAGCTT	58.907	20	TTGTTTGGGCGAGAAGGTTG	58.971	20	201	115	315
scaf_0000711_20	p3	(ATT)5	15	151	165	ACATTGCTCAAACCTGCGTT	58.968	20	GAACTTGCAGCACTTTCCCA	58.968	20	202	62	263	AGTCCATGGACCGTCTGTTT	58.943	20	GAACTTGCAGCACTTTCCCA	58.968	20	257	7	263	AAGTCCATGGACCGTCTGTT	58.943	20	GAACTTGCAGCACTTTCCCA	58.968	20	258	6	263
scaf_0000713_4	p3	(TGG)6	18	151	168	GCTCCGTTTGTTTTGGTGGA	59.258	20	TACACTACCACCACCACCAC	58.95	20	158	17	174	GCTCCGTTTGTTTTGGTGGA	59.258	20	ATCACCTCCACCAACACACT	58.86	20	128	17	144	GCTCCGTTTGTTTTGGTGGA	59.258	20	CATCACCTCCACCAACACAC	58.762	20	129	17	145
scaf_0000713_10	p3	(AAT)6	18	151	168	GCTCCTCATTACTCTCATCTCCA	59.106	23	AGCAGAAGAGGTGAGGAATCA	58.455	21	278	29	306	AGCTCCTCATTACTCTCATCTCC	58.848	23	AGCAGAAGAGGTGAGGAATCA	58.455	21	279	28	306	GCTCCTCATTACTCTCATCTCCA	59.106	23	GCAGAAGAGGTGAGGAATCAG	58.096	21	277	29	305
scaf_0000713_11	p3	(TTA)6	18	151	168	CGTTGCCTAGGACTAGCCAT	59.247	20	CACAGCTTAGAGAAATGATGCCA	59.057	23	133	185	317	GTGACAAAAGATGGGCTGCT	58.749	20	CACAGCTTAGAGAAATGATGCCA	59.057	23	100	218	317	CGTTGCCTAGGACTAGCCAT	59.247	20	CAGCTTAGAGAAATGATGCCAGT	58.802	23	131	185	315
scaf_0000713_19	p4	(TTTG)5	20	151	170	TCCTCGATCTGTACGCTGTC	58.985	20	TGCCGTCCTTATCGAATCGA	58.973	20	131	92	222	CCTCGATCTGTACGCTGTCT	58.982	20	TGCCGTCCTTATCGAATCGA	58.973	20	130	93	222	TCCTCGATCTGTACGCTGTC	58.985	20	GCCAGTTTCCTTGTGCTTCA	58.968	20	190	92	281
scaf_0000717_1	p3	(ATC)8	24	369	392	TTGACAGCCAAGTTGGACAC	58.611	20	GCCGGTGATGATGATGATGA	57.826	20	125	273	397	TTGACAGCCAAGTTGGACAC	58.611	20	GCCGGTGATGATGATGATGA	57.826	20	223	175	397	TTGACAGCCAAGTTGGACAC	58.611	20	AGCCGGTGATGATGATGATG	57.82	20	126	273	398
scaf_0000717_2	p3	(ATC)8	24	151	174	AGCTTTGCCCGCCAATTTTA	59.027	20	TTTCTGCAGAGGGACTTCGA	58.662	20	100	205	304	TAGCTTTGCCCGCCAATTTT	59.027	20	TTCTGCAGAGGGACTTCGAA	58.662	20	100	204	303	TAGCTTTGCCCGCCAATTTT	59.027	20	TTTCTGCAGAGGGACTTCGA	58.662	20	101	204	304
scaf_0000718_1	p3	(ACC)5	15	151	165	ACGTCACCATACCACCACAT	59.019	20	TTTGTGTTTGGTGGTGGTGG	59.102	20	133	41	173	CTCCACCACTACACGACCAT	59.104	20	TTTGTGTTTGGTGGTGGTGG	59.102	20	106	68	173	TCCACCACTACACGACCATC	59.107	20	TTTGTGTTTGGTGGTGGTGG	59.102	20	105	69	173
scaf_0000718_2	p3	(ACC)5	15	24	38	CCACCACCACCAAACACAAA	59.102	20	TGGCTCAAAGTGGTTGTGTG	58.898	20	267	27	293	CCACCACCACCAAACACAAA	59.102	20	ACACTCTGGCTCAAAGTGGT	59.16	20	273	27	299	CCACCACCACCAAACACAAA	59.102	20	CACACTCTGGCTCAAAGTGG	58.767	20	274	27	300
scaf_0000718_7	p3	(AAT)7	21	293	313	TCCCGTGTCCATGTTCGTAT	58.812	20	CATTTGAAGGGAGGGGGAGT	58.997	20	263	25	287	TCCCGTGTCCATGTTCGTAT	58.812	20	ACATTTGAAGGGAGGGGGAG	58.997	20	264	25	288	ATCCCGTGTCCATGTTCGTA	58.812	20	CATTTGAAGGGAGGGGGAGT	58.997	20	264	24	287
scaf_0000718_8	p3	(AAT)7	21	151	171	GGGCAAATCTCTCTCTCTCCT	58.602	21	CATTTGAAGGGAGGGGGAGT	58.997	20	145	1	145	GGGCAAATCTCTCTCTCTCCT	58.602	21	ACATTTGAAGGGAGGGGGAG	58.997	20	146	1	146	GGGGCAAATCTCTCTCTCTCC	59.584	21	CATTTGAAGGGAGGGGGAGT	58.997	20	146	0	145
scaf_0000718_10	p4	(AAAG)5	20	151	170	GGCGCATTCTTCAACATTGC	59.006	20	CAACAACAACAACAGATGTCCA	57.631	22	103	193	295	GGCGCATTCTTCAACATTGC	59.006	20	ACAACAACAACAACAGATGTCC	57.63	22	104	193	296	GGGGCGCATTCTTCAACATT	59.468	20	CAACAACAACAACAGATGTCCA	57.631	22	105	191	295
scaf_0000718_10	p3	(TGT)10	30	283	312	GGCGCATTCTTCAACATTGC	59.006	20	CAACAACAACAACAGATGTCCA	57.631	22	103	193	295	GGCGCATTCTTCAACATTGC	59.006	20	ACAACAACAACAACAGATGTCC	57.63	22	104	193	296	GGGGCGCATTCTTCAACATT	59.468	20	CAACAACAACAACAGATGTCCA	57.631	22	105	191	295
scaf_0000718_11	p4	(AAAG)5	20	19	38	GGCGCATTCTTCAACATTGC	59.006	20	GGGAAGTGGTTCACAAGCTG	59.046	20	214	61	274	ATTGCAATCAGGTTCGTCGG	58.913	20	GGGAAGTGGTTCACAAGCTG	59.046	20	199	76	274	GGCGCATTCTTCAACATTGC	59.006	20	ATGGTGGGAAGTGGTTCACA	59.15	20	219	61	279
scaf_0000718_11	p3	(TGT)10	30	151	180	GGCGCATTCTTCAACATTGC	59.006	20	GGGAAGTGGTTCACAAGCTG	59.046	20	214	61	274	ATTGCAATCAGGTTCGTCGG	58.913	20	GGGAAGTGGTTCACAAGCTG	59.046	20	199	76	274	GGCGCATTCTTCAACATTGC	59.006	20	ATGGTGGGAAGTGGTTCACA	59.15	20	219	61	279
scaf_0000719_14	p3	(ATC)5	15	151	165	CTGCCTTTTTGAACATATCTGCC	58.573	23	GAAGTCATCGACGACCTCCA	59.191	20	246	51	296	CTGCCTTTTTGAACATATCTGCC	58.573	23	TGAAGTCATCGACGACCTCC	59.191	20	247	51	297	CTGCCTTTTTGAACATATCTGCC	58.573	23	CACCGTTGTGAAATCGGAGG	59.204	20	228	51	278
scaf_0000720_1	p4	(AAAT)6	24	151	174	ACACAAACAGTCCACAACCA	57.792	20	GGGAGCGCTAGATGGAGATT	59.027	20	198	92	289	AGGTCACAAACAAACCCACA	57.776	20	GGGAGCGCTAGATGGAGATT	59.027	20	240	50	289	TCACAAACAAACCCACAACCA	58.752	21	GGGAGCGCTAGATGGAGATT	59.027	20	237	53	289
scaf_0000720_4	p3	(CTC)9	27	151	177	ACCACTCCTCTTGCTGAGTC	59.027	20	GCAGCAGGAGGAGAAACAAC	59.122	20	164	74	237	TCCCGCTAAACTTGTTCCCT	58.938	20	GCAGCAGGAGGAGAAACAAC	59.122	20	195	43	237	ACCACTCCTCTTGCTGAGTC	59.027	20	GATCAGCAGCAGGAGGAGAA	59.171	20	169	74	242
scaf_0000720_12	p3	(ATT)6	18	151	168	TTTGAGACCTGCCTGTTCCT	58.86	20	GCCTCCATGAAACCCCAATC	58.885	20	212	7	218	TCCTTTTGAGACCTGCCTGT	58.86	20	GCCTCCATGAAACCCCAATC	58.885	20	216	3	218	AATGATTTGGGAGTGTGCCG	58.823	20	GCCTCCATGAAACCCCAATC	58.885	20	170	49	218
scaf_0000721_5	p3	(ATG)5	15	151	165	TGCTACGTCAGTTTGACCCA	59.246	20	GTCCACTCTCTTTGCAATCTCA	58.332	22	137	94	230	TGCTACGTCAGTTTGACCCA	59.246	20	TGTCCACTCTCTTTGCAATCTC	58.332	22	138	94	231	TGCTACGTCAGTTTGACCCA	59.246	20	TGTCCACTCTCTTTGCAATCT	57.223	21	138	94	231
scaf_0000723_7	p3	(TTC)14	42	151	192	TGCCACGTTTGTTCCTTTATGT	59.047	22	CCCAACTTTCTCTAGCTGATGC	59.058	22	179	129	307	GGTTGTTGTTGATGGTTTTGGG	58.798	22	CCCAACTTTCTCTAGCTGATGC	59.058	22	102	206	307	TGCCACGTTTGTTCCTTTATG	57.365	21	CCCAACTTTCTCTAGCTGATGC	59.058	22	179	129	307
scaf_0000723_12	p3	(AAT)5	15	151	165	AGAAATTAAAGATAGCAGGCGGG	58.862	23	TGACAAGCATTACACACTGGG	58.497	21	100	12	111	TTAAAGATAGCAGGCGGGGG	59.528	20	CTCTCTTGACAAGCATTACACAC	57.725	23	101	17	117	AATTAAAGATAGCAGGCGGGG	58.136	21	TCTTGACAAGCATTACACACTGG	59.185	23	100	15	114
scaf_0000724_2	p3	(AAT)9	27	151	177	CCTGGGTCATGTTCGGATCT	59.167	20	GGAAACAGGAAACACAGCCA	58.601	20	191	88	278	TCCTGGGTCATGTTCGGATC	59.169	20	GGAAACAGGAAACACAGCCA	58.601	20	192	87	278	TGGGTCATGTTCGGATCTGT	58.724	20	GGAAACAGGAAACACAGCCA	58.601	20	189	90	278
scaf_0000724_9	p3	(GAA)5	15	151	165	CCAAGCCCAAGCAACAAGAT	59.029	20	ACAGTCATCCTTGTTGGTTGC	59.044	21	113	168	280	CCAAGCCCAAGCAACAAGAT	59.029	20	CAGTCATCCTTGTTGGTTGCA	59.044	21	112	168	279	CCAAGCCCAAGCAACAAGAT	59.029	20	AGTCATCCTTGTTGGTTGCA	57.637	20	111	168	278
scaf_0000724_14	p3	(ACC)6	18	151	168	ATTACCCTCCCTGCACCATC	59.153	20	GGAGATACGGTAGTGGCGTT	59.257	20	262	18	279	ATCATTACCCTCCCTGCACC	59.153	20	GGAGATACGGTAGTGGCGTT	59.257	20	265	15	279	ATTACCCTCCCTGCACCATC	59.153	20	AAAAAGGGAGTGGTGGTGGT	59.366	20	161	18	178
scaf_0000727_1	p3	(GGT)5	15	151	165	TATTTACGGTGGGTGGTGGG	59.38	20	CTACCACCCACCACCATCAC	60.035	20	193	57	249	TATTTACGGTGGGTGGTGGG	59.38	20	TACCACCCACCACCATCAC	58.928	19	192	57	248	TATTTACGGTGGGTGGTGGG	59.38	20	CTACCACCCACCACCATCA	58.617	19	193	57	249
scaf_0000727_3	p3	(TGG)10	30	151	180	AGTAGGTGATGGTGGTGGTG	59.016	20	CCATCTGCCACTACCGTCTA	58.6	20	102	141	242	AGTAGGTGATGGTGGTGGTG	59.016	20	ATCTGCCACTACCGTCTACC	58.599	20	100	141	240	GTACTGGTGGCAAATGGGTG	59.112	20	CTCCACTACCATCTACCGCC	59.325	20	101	111	211
scaf_0000727_20	p3	(ATC)5	15	151	165	CTCACTTTGGATCCAAGCGG	58.91	20	GAATGAAGATGGCAGACGGG	58.697	20	101	116	216	TAAAACTAGCCCGTCTGCCA	59.022	20	AGAAGCGATCAGTGTTGCTG	58.563	20	125	188	312	CTCACTTTGGATCCAAGCGG	58.91	20	AGAAGCGATCAGTGTTGCTG	58.563	20	197	116	312
scaf_0000728_10	p3	(TTC)5	15	151	165	AAGTTGAGGGTACGAGGTCA	57.995	20	CACGTCCTAGTCACCTCCAA	58.746	20	243	42	284	CGTAAGTTGAGGGTACGAGGT	59.185	21	CACGTCCTAGTCACCTCCAA	58.746	20	246	39	284	AGTTGAGGGTACGAGGTCAT	57.767	20	CACGTCCTAGTCACCTCCAA	58.746	20	242	43	284
scaf_0000730_2	p4	(TTTA)7	28	151	178	TGAACAAGCTTGAACTCGGC	59.056	20	TAACAAGGTTGAGCTCGTGC	58.491	20	115	95	209	AGCTTGAACTCGGCTCGATA	58.896	20	TAACAAGGTTGAGCTCGTGC	58.491	20	109	101	209	TGAACAAGCTTGAACTCGGC	59.056	20	CGTGCTCGTCCGCAAAATAA	59.559	20	100	95	194
scaf_0000731_19	p3	(ATT)9	27	151	177	GGATGTGATTGAAGGTACCACA	58.05	22	CGAGGAAAGCATTGCCTTGT	59.116	20	196	128	323	GGATGTGATTGAAGGTACCACA	58.05	22	ACGAGGAAAGCATTGCCTTG	59.116	20	197	128	324	TGGATGTGATTGAAGGTACCAC	58.05	22	CGAGGAAAGCATTGCCTTGT	59.116	20	197	127	323
scaf_0000731_28	p3	(GGA)5	15	151	165	AGGAGGAGGAGGAGTGTGAT	58.985	20	GCTTCCTCAACCCCTTTTGG	59.031	20	107	152	258	GGAGGAGGAGGAGTGTGATG	58.881	20	GCTTCCTCAACCCCTTTTGG	59.031	20	106	153	258	AGGAGGAGGAGGAGTGTGAT	58.985	20	AGTGCTTCCTCAACCCCTTT	59.146	20	110	152	261
scaf_0000732_1	p3	(CAC)10	30	151	180	GCACGTGTCACCGTATAACC	59.006	20	GATTCGAGTTGAAGGCGGTC	59	20	214	25	238	GCAAATTTAACCCAGCCCCA	59.02	20	GATTCGAGTTGAAGGCGGTC	59	20	133	106	238	GCACGTGTCACCGTATAACC	59.006	20	TGGGGCTGGGTTAAATTTGC	59.02	20	101	25	125
scaf_0000732_14	p3	(AAT)6	18	151	168	ACTCGACTTCTCAGTTGTTGAA	57.613	22	TGGTGTTGATTACCGATCCCA	59.09	21	166	106	271	ACTCGACTTCTCAGTTGTTGAA	57.613	22	GGTGTTGATTACCGATCCCA	57.297	20	165	106	270	ACTCGACTTCTCAGTTGTTGAA	57.613	22	TGGTGTTGATTACCGATCCC	57.297	20	166	106	271
scaf_0000732_23	p4	(TTTA)5	20	151	170	TGGATTGACAGGTTTAGGGGT	58.646	21	AACCCGTTAACATCCCACCT	58.93	20	150	52	201	TGGATTGACAGGTTTAGGGGT	58.646	21	ATCCCACCTAGTGCAAACCA	58.928	20	139	52	190	TGGATTGACAGGTTTAGGGGT	58.646	21	TCCCACCTAGTGCAAACCAA	59.153	20	138	52	189
scaf_0000735_19	p3	(CTT)14	42	151	192	GGTTTGCAAATCAAGCTTGGA	57.89	21	AGATGATGACACGTGTCCCC	59.463	20	192	105	296	AGGTTTGCAAATCAAGCTTGG	57.884	21	AGATGATGACACGTGTCCCC	59.463	20	193	104	296	GGTTTGCAAATCAAGCTTGGA	57.89	21	CAGATGATGACACGTGTCCC	58.355	20	193	105	297
scaf_0000737_20	p3	(AAT)5	15	151	165	CTTGGGCCTAAACGAGCTG	58.529	19	ATTGCGAAGGATGGAAGTGC	58.902	20	142	11	152	CTAAACGAGCTGGGCCCAT	59.775	19	ATTGCGAAGGATGGAAGTGC	58.902	20	135	18	152	TAAACGAGCTGGGCCCATC	59.777	19	ATTGCGAAGGATGGAAGTGC	58.902	20	134	19	152
scaf_0000739_12	p4	(TTTA)5	20	151	170	TGGGTTTTTGTTCGATGGTGT	58.62	21	GATTAGGCTCCAAGGCATGC	59.043	20	238	20	257	TGGGTTTTTGTTCGATGGTGT	58.62	21	ATTAGGCTCCAAGGCATGCT	59.445	20	237	20	256	TGGGTTTTTGTTCGATGGTGT	58.62	21	CTCCAAGGCATGCTGGAATT	58.518	20	231	20	250
scaf_0000740_6	p3	(TTG)5	15	7	21	GGTAGGCATGGGTGTGTTCT	59.672	20	TGGTGTGATCTGTTCCCAAAA	57.695	21	141	89	229	CATGGGTGTGTTCTTCGGAA	58.109	20	TGGTGTGATCTGTTCCCAAAA	57.695	21	135	95	229	GGTAGGCATGGGTGTGTTCT	59.672	20	ATGGTGTGATCTGTTCCCAAA	57.476	21	142	89	230
scaf_0000740_9	p4	(AAAT)5	20	151	170	TCCATTGTTGAAAGTACGTGGA	57.925	22	CCTTGAGGGCATTGAACTGT	58.085	20	210	56	265	TCCATTGTTGAAAGTACGTGGA	57.925	22	TGGAATTTGTTGCCCTTGAGG	59.03	21	223	56	278	GCTTCCATTGTTGAAAGTACGTG	58.781	23	CCTTGAGGGCATTGAACTGT	58.085	20	213	53	265
scaf_0000742_12	p3	(CAC)6	18	151	168	AGCCACAGAGATCGAAACCA	59.023	20	TTTCGTGCTTAGAGCGATGC	59.001	20	117	85	201	GCCACAGAGATCGAAACCAC	58.92	20	TTTCGTGCTTAGAGCGATGC	59.001	20	116	86	201	AGCCACAGAGATCGAAACCA	59.023	20	GCTTTTCGTGCTTAGAGCGA	58.932	20	120	85	204
scaf_0000746_5	p3	(AAC)5	15	151	165	GTCTAACACCTCAAGGCCCT	59.015	20	TGATTGGGAGCTTTGTGTGC	59.039	20	250	44	293	GTCTAACACCTCAAGGCCCT	59.015	20	GGAGCTTTGTGTGCGAGTAG	58.928	20	244	44	287	AGGCCCTAAAGACACACGAA	58.947	20	TGATTGGGAGCTTTGTGTGC	59.039	20	237	57	293
scaf_0000747_4	p3	(ATT)5	15	151	165	TGTTTTCCCAGACCACTGTT	57.181	20	GCAACCAGGGCAGTATCATG	58.973	20	160	49	208	TTGTTTTCCCAGACCACTGT	57.181	20	GCAACCAGGGCAGTATCATG	58.973	20	161	48	208	CAGCGAACATGATACTGCCC	59.06	20	TGGTCCTGATGTGAATGACC	57.213	20	100	182	281
scaf_0000749_5	p4	(TTTA)5	20	151	170	CTTCCAACCAATTTCTCTCCCA	58.233	22	GTTGTCATGTCACCAATGCCT	59.111	21	179	51	229	TTCCAACCAATTTCTCTCCCA	57.106	21	GTTGTCATGTCACCAATGCCT	59.111	21	178	52	229	CTTCCAACCAATTTCTCTCCCA	58.233	22	TGTCATGTCACCAATGCCTT	57.709	20	177	51	227
scaf_0000752_7	p3	(TTA)6	18	151	168	GGGTGGTGGGTTTTGTTACC	58.958	20	ACAAAGCATTAGGAATGACCCT	57.678	22	194	121	314	GGGGTGGTGGGTTTTGTTAC	58.958	20	ACAAAGCATTAGGAATGACCCT	57.678	22	195	120	314	AGGGGTGGTGGGTTTTGTTA	59.065	20	ACAAAGCATTAGGAATGACCCT	57.678	22	196	119	314
scaf_0000752_8	p3	(AAT)10	30	151	180	CAGATGATGCTTTCGGCTCC	59.057	20	CCAACCAAACACAGCACTCA	58.898	20	189	15	203	CAGATGATGCTTTCGGCTCC	59.057	20	ACCCCAAATCTCCCAACCAA	59.136	20	201	15	215	ATGATGCTTTCGGCTCCAAC	58.902	20	CCAACCAAACACAGCACTCA	58.898	20	186	18	203
scaf_0000752_23	p4	(AAAT)5	20	151	170	TGAGTTTAACTTGAGCTAGGCT	57.108	22	GTCCAAGCCCAGCCCAAG	60.678	18	101	213	313	TGAGTTTAACTTGAGCTAGGCT	57.108	22	TCCAAGCCCAGCCCAAGTT	61.778	19	100	213	312	AGTTTAACTTGAGCTAGGCTTGG	58.672	23	TGTCCAAGCCCAGCCCAA	61.507	18	100	215	314
scaf_0000753_6	p3	(ATC)6	18	151	168	CGCACTTGGCATCTTTCTCA	58.841	20	CCCCTAAACTCCTAAGCCCC	59.155	20	113	117	229	CGCACTTGGCATCTTTCTCA	58.841	20	CAAACCCCAAACCCTAACCC	58.656	20	137	117	253	CGCACTTGGCATCTTTCTCA	58.841	20	CCAAACCCCAAACCCTAACC	58.656	20	138	117	254
scaf_0000755_7	p3	(ATT)15	45	151	195	TGTAGTTGTCGACATCAAGGAT	57.199	22	AAACCAAGACCCTGGCTTTG	58.587	20	122	6	127	TGTAGTTGTCGACATCAAGGAT	57.199	22	CAAACCAAGACCCTGGCTTT	58.587	20	123	6	128	TGTAGTTGTCGACATCAAGGAT	57.199	22	AAAGCAAACCAAGACCCTGG	58.587	20	127	6	132
scaf_0000756_2	p3	(TGG)7	21	151	171	CATGGTAGCGTTGATGGTGG	58.983	20	CACTACCACCATGCCAACAC	59.119	20	139	136	274	GGCAGTAATGGCATGGTAGC	59.046	20	CACTACCACCATGCCAACAC	59.119	20	150	125	274	GGTAGTGGTAGTGGTGGCAT	59.09	20	CACTACCACCATGCCAACAC	59.119	20	194	81	274
scaf_0000757_3	p3	(TTA)11	33	151	183	GCGTAACATCCTTCTCCTGG	58.059	20	CGAGCACCAAATTCTCGGAT	58.343	20	280	51	330	TGGCGTAACATCCTTCTCCT	58.431	20	GCACCAAATTCTCGGATCCT	57.956	20	279	49	327	TGGCGTAACATCCTTCTCCT	58.431	20	AGCACCAAATTCTCGGATCC	57.956	20	280	49	328
scaf_0000758_14	p3	(AGA)13	39	151	189	AGAGAAAATGGGGAGGTGGG	58.997	20	CCATCACCACCATCAGCAAC	59.187	20	132	201	332	AGAAAATGGGGAGGTGGGTT	58.833	20	CCATCACCACCATCAGCAAC	59.187	20	130	203	332	AGAGAAAATGGGGAGGTGGG	58.997	20	ACAGACCATCACCACCATCA	58.639	20	137	201	337
scaf_0000758_22	p4	(ACAT)6	24	151	174	GTGAAAGGCACGAGACAGTG	59.138	20	ACGACGTGACGATCATGAGA	58.916	20	168	56	223	GGGTAGGAAGCAGAGGGAAG	59.166	20	ACGACGTGACGATCATGAGA	58.916	20	216	8	223	GAAGCAGAGGGAAGAGAGGG	59.17	20	ACGACGTGACGATCATGAGA	58.916	20	210	14	223
scaf_0000758_23	p4	(ACAT)6	24	24	47	TCTCATGATCGTCACGTCGT	58.916	20	AGACATGAGGTTGACTGGGG	59.013	20	197	77	273	CTCCTCCCAATAACCCCCTC	58.859	20	AGACATGAGGTTGACTGGGG	59.013	20	167	107	273	TGATGCGCTCCTCCCAATAA	59.163	20	AGACATGAGGTTGACTGGGG	59.013	20	174	100	273
scaf_0000758_24	p3	(CCA)6	18	301	318	CTCCCTCCTCACACTCACTC	58.818	20	AAGCTGGTCGTGGAATCAGA	59.023	20	265	23	287	CTCCCTCCTCACACTCACTC	58.818	20	AGAAGCTGGTCGTGGAATCA	59.023	20	267	23	289	CTCCCTCCTCACACTCACTC	58.818	20	GAGCCTCCTGCCATTGAATG	58.97	20	240	23	262
scaf_0000759_3	p4	(CATC)6	24	151	174	TGGGAAGGCCTTGGTTACAT	58.919	20	CACTGACGTACATGCCTTCG	59.008	20	254	48	301	CCATCCATCTTCGGAGGTGA	58.877	20	CACTGACGTACATGCCTTCG	59.008	20	137	165	301	TCCATCCATCTTCGGAGGTG	58.877	20	CACTGACGTACATGCCTTCG	59.008	20	138	164	301
scaf_0000761_4	p4	(TATT)7	28	151	178	AGACTGTGTGTGGATTGGGT	58.86	20	TGGCCATCAACTCTAGCCTT	58.711	20	217	67	283	TCTTGGGCATGGGCTAGATT	58.775	20	TGGCCATCAACTCTAGCCTT	58.711	20	276	8	283	CTTGGGCATGGGCTAGATTG	58.675	20	TGGCCATCAACTCTAGCCTT	58.711	20	275	9	283
scaf_0000762_1	p3	(GAA)6	18	151	168	GGTCCAATACCCACAATGGC	58.889	20	TGCTCGTGTCTAGTCGTTGA	58.768	20	171	111	281	TCCTTCAACTCGGCCTATGG	59.169	20	TGCTCGTGTCTAGTCGTTGA	58.768	20	279	3	281	ATCGAGCATACCGAAGCAGT	59.253	20	TGCTCGTGTCTAGTCGTTGA	58.768	20	236	46	281
scaf_0000764_1	p4	(TAAA)5	20	151	170	AGAAGTTGAGAGGATGAGTTCC	57.183	22	TCCCTCCAAGCAACCTTTCT	58.851	20	115	1	115	AGAAGTTGAGAGGATGAGTTCC	57.183	22	TCTTTCCCTCCAAGCAACCT	58.851	20	119	1	119	AAGAAGTTGAGAGGATGAGTTCC	57.841	23	TCCCTCCAAGCAACCTTTCT	58.851	20	116	0	115
scaf_0000765_11	p3	(ATT)5	15	151	165	GGTTGATGTTGCAGTTGGAGT	59.044	21	AGCAGGCGATCTTTCCAAGA	59.385	20	190	40	229	TGGAGGTTGATGTTGCAGTTG	59.044	21	AGCAGGCGATCTTTCCAAGA	59.385	20	194	36	229	GGTTGATGTTGCAGTTGGAGT	59.044	21	GCAGGCGATCTTTCCAAGAA	58.547	20	189	40	228
scaf_0000766_11	p4	(ATTT)6	24	151	174	GATCAGCCGTTGCAACATCT	58.91	20	CGGATCCCCTCTTTGCAAAG	58.902	20	128	116	243	AGATCAGCCGTTGCAACATC	58.91	20	CGGATCCCCTCTTTGCAAAG	58.902	20	129	115	243	GAGATCAGCCGTTGCAACAT	58.91	20	CGGATCCCCTCTTTGCAAAG	58.902	20	130	114	243
scaf_0000767_3	p3	(AAT)5	15	151	165	CATGCAAGAGGGTCCGAATG	58.98	20	TCATGCATGCGATCCTTGTG	58.981	20	266	3	268	TGAGTGTCCAAATGTCCGGA	58.947	20	TCATGCATGCGATCCTTGTG	58.981	20	248	21	268	ATGCAAGAGGGTCCGAATGA	59.088	20	TCATGCATGCGATCCTTGTG	58.981	20	265	4	268
scaf_0000769_11	p3	(TGA)11	33	12	44	AATTTGAACACACACGCACG	58.179	20	TCTGTTCCTTACTCCACTTCTCT	58.258	23	123	124	246	AAATTTGAACACACACGCACG	58.819	21	TCTGTTCCTTACTCCACTTCTCT	58.258	23	124	123	246	AATTTGAACACACACGCACG	58.179	20	CTGTTCCTTACTCCACTTCTCTT	57.524	23	122	124	245
scaf_0000774_9	p3	(CTC)6	18	151	168	GAAAGGATTCCCAGGACCCA	59	20	CGTCGAACGAGTCCATCAAC	59.017	20	141	52	192	GAAAGGATTCCCAGGACCCA	59	20	GAGGAGGAGGAGGAGGAGAA	59.069	20	116	52	167	AAAGGATTCCCAGGACCCAC	59.295	20	CGTCGAACGAGTCCATCAAC	59.017	20	140	53	192
scaf_0000775_14	p3	(CCA)5	15	151	165	AGGCCTTGAACATTGCCAAG	59.029	20	GGCTGTTTTGGTTGGGACAT	58.952	20	122	30	151	AGGCCTTGAACATTGCCAAG	59.029	20	TAAGATGGTGGTGGTGGTGG	59.304	20	140	30	169	ACTCGTGGTCTTTTAGGCCT	58.651	20	GGCTGTTTTGGTTGGGACAT	58.952	20	136	16	151
scaf_0000776_9	p3	(AAT)6	18	151	168	ATGAGTAGGAGAGTGCCACG	58.893	20	ACCTTCAAATGCATGTCTCCC	58.55	21	196	114	309	TGATCCTCCACATTCTCCACC	59.16	21	AATTACAGGACACGTGGCAC	58.481	20	100	46	145	AGTGCCACGTGTCCTGTAAT	59.315	20	ACCTTCAAATGCATGTCTCCC	58.55	21	185	125	309
scaf_0000778_8	p4	(AAAT)5	20	151	170	AGCTAAGCTCTGCTGACGAA	59.109	20	TGAATGAAAACCATGCTCGCT	58.838	21	137	57	193	AAGCTAAGCTCTGCTGACGA	59.109	20	TGAATGAAAACCATGCTCGCT	58.838	21	138	56	193	GCCAAAAGCTAAGCTCTGCT	58.828	20	TGAATGAAAACCATGCTCGCT	58.838	21	143	51	193
scaf_0000778_14	p3	(TTC)7	21	151	171	ATCCAGAGTACTTGCCCTCG	58.885	20	CAACGAGTCTTCAAGAGCGG	58.936	20	236	48	283	CAGAGTACTTGCCCTCGTCT	58.822	20	CAACGAGTCTTCAAGAGCGG	58.936	20	233	51	283	ATCCAGAGTACTTGCCCTCG	58.885	20	CGGGTGGGAGTGAAGAGAAA	59.315	20	219	48	266
scaf_0000780_18	p3	(TGA)7	21	151	171	GGATGTGGGGATGTTCAGGA	59.081	20	CATCAGCATCGCCGTGTTTA	58.994	20	131	78	208	GGATGTGGGGATGTTCAGGA	59.081	20	ATCAGCATCGCCGTGTTTAC	58.993	20	130	78	207	GGTCCTCAAGATCTACGGCA	58.888	20	CATCAGCATCGCCGTGTTTA	58.994	20	181	28	208
scaf_0000780_19	p3	(TGA)7	21	24	44	TAAACACGGCGATGCTGATG	58.994	20	AGGGCTAACAACCTCAGCAT	59.005	20	229	62	290	GTAAACACGGCGATGCTGAT	58.993	20	AGGGCTAACAACCTCAGCAT	59.005	20	230	61	290	TAAACACGGCGATGCTGATG	58.994	20	AGACCAGGGCTAACAACCTC	59.015	20	234	62	295
scaf_0000785_11	p3	(AAT)11	33	151	183	ATGCCTCCTAGCTTGCAAGA	59.085	20	TTCAAGGCCTTTTAGGTGCT	57.324	20	196	83	278	AGATGCCTCCTAGCTTGCAA	59.085	20	TTCAAGGCCTTTTAGGTGCT	57.324	20	198	81	278	ATGCCTCCTAGCTTGCAAGA	59.085	20	TCGTGCAATATTTCAAGGCCT	58.278	21	207	83	289
scaf_0000787_20	p3	(TTC)8	24	407	430	AAGGAAGAGAAGAAGGCGGT	58.647	20	TCAACACATCATCATCAGCCA	57.647	21	132	54	185	AGGAAGAGAAGAAGGCGGTG	59.389	20	TCAACACATCATCATCAGCCA	57.647	21	131	55	185	GGAAGAGAAGAAGGCGGTGA	59.391	20	TCAACACATCATCATCAGCCA	57.647	21	130	56	185
scaf_0000787_33	p3	(GGT)5	15	151	165	AAGGGTACATATAGGGCGGC	59.018	20	GGTTACTACCCACCTCCACC	59.093	20	100	126	225	TCACAGGTCCACAAGGGTAC	58.947	20	GGTTACTACCCACCTCCACC	59.093	20	112	114	225	TGCTCAACATAGGGTGGAGG	59.088	20	TCCCTGCACCATATGATCCC	58.933	20	100	86	185
scaf_0000790_14	p3	(TGG)8	24	151	174	GGTGGGTTAGAGCGATTCCT	59.169	20	TCGAAAAAGCAGCCTCAACC	59.048	20	101	169	269	AAGTTTGGCGGTGGTTGAAG	59.256	20	TCGAAAAAGCAGCCTCAACC	59.048	20	152	118	269	ACTAAGTTTGGCGGTGGTTG	58.685	20	TCGAAAAAGCAGCCTCAACC	59.048	20	155	115	269
scaf_0000791_6	p4	(AAGA)5	20	151	170	CGTTAGCAGTGGTGTTAGGC	58.924	20	CTACAACCACCAAAGGCCAC	59.041	20	184	35	218	GCGTTAGCAGTGGTGTTAGG	58.924	20	CTACAACCACCAAAGGCCAC	59.041	20	185	34	218	GGTCGCTTCACTCTCACTCT	59.115	20	CTACAACCACCAAAGGCCAC	59.041	20	153	66	218
scaf_0000794_4	p3	(ATA)14	42	151	192	TCATTACACTCTGCGGGTCC	59.465	20	CACTACAGGCCACGTTTCAA	58.411	20	237	23	259	GTCATTACACTCTGCGGGTC	58.358	20	CACTACAGGCCACGTTTCAA	58.411	20	238	22	259	GGTCATTACACTCTGCGGGT	59.751	20	CACTACAGGCCACGTTTCAA	58.411	20	239	21	259
scaf_0000797_5	p3	(CTG)6	18	151	168	GCAGCTCGTAGTTTCATGGG	58.99	20	TTGTTTCAACAGCAGCAGCA	59.184	20	109	68	176	GCAGCTCGTAGTTTCATGGG	58.99	20	GTTGTTTCAACAGCAGCAGC	58.797	20	110	68	177	GCAGCTCGTAGTTTCATGGG	58.99	20	CTAGTGGAAGTGGGGAGAGG	58.509	20	159	68	226
scaf_0000797_20	p3	(GTG)6	18	292	309	AGGACGCGTTTTCAAGCATT	59.048	20	ACTCCTCTGCTCTCCTCTCA	59.001	20	227	100	326	AAGGACGCGTTTTCAAGCAT	59.048	20	ACTCCTCTGCTCTCCTCTCA	59.001	20	228	99	326	CGCGTTTTCAAGCATTCCAC	58.948	20	ACTCCTCTGCTCTCCTCTCA	59.001	20	223	104	326
scaf_0000798_25	p3	(TCA)8	24	151	174	TTATACCCAATTGCTGCCGC	58.971	20	CTCCCCCAAATCTCACCTCA	58.711	20	255	66	320	GCCTCCTCCTCTTTCTCCTC	58.88	20	CTCCCCCAAATCTCACCTCA	58.711	20	237	84	320	GCTCTAGAGGGCCAATCACT	58.873	20	CTCCCCCAAATCTCACCTCA	58.711	20	275	46	320
scaf_0000800_7	p3	(TAG)5	15	151	165	AGGTTATGGTTGGACTCGCA	59.019	20	CCAACCATCGGAGAGCAAAG	58.91	20	191	47	237	GGTTATGGTTGGACTCGCAC	58.916	20	CCAACCATCGGAGAGCAAAG	58.91	20	190	48	237	AGGTTATGGTTGGACTCGCA	59.019	20	TAACCCAACCATCGGAGAGC	59.46	20	195	47	241
scaf_0000803_9	p3	(TAG)9	27	151	177	GAGCAGGGCAGAGGGATATT	58.937	20	GTGTGCAAAGTTTGAAATGGGG	59.128	22	124	202	325	GAGCAGGGCAGAGGGATATT	58.937	20	TGTGCAAAGTTTGAAATGGGG	57.809	21	123	202	324	GAGCAGGGCAGAGGGATATT	58.937	20	TGTGCAAAGTTTGAAATGGGGA	59.231	22	123	202	324
scaf_0000803_19	p3	(CAC)6	18	151	168	TACCACAATCACCACCACCA	58.859	20	GGGGTTGATAGTGGTAGCGA	58.883	20	171	141	311	GCCACCACTACCACAATCAC	58.835	20	GGGGTTGATAGTGGTAGCGA	58.883	20	179	133	311	TACCACAATCACCACCACCA	58.859	20	TGGGGTTGATAGTGGTAGCG	59.172	20	172	141	312
scaf_0000803_21	p3	(TAA)5	15	151	165	TTCGGCAGAGAGTGAGAAGA	58.089	20	GTGGCCATGGGTGATGTTAC	58.897	20	201	113	313	TCGGCAGAGAGTGAGAAGATC	58.979	21	GTGGCCATGGGTGATGTTAC	58.897	20	200	114	313	GGCAGAGAGTGAGAAGATCCA	58.893	21	GTGGCCATGGGTGATGTTAC	58.897	20	198	116	313
scaf_0000805_20	p3	(AAT)10	30	151	180	CCAACTTCCCAAACAAGGCT	58.587	20	CTGGCTGAAAAGGCTGCTAC	59.193	20	217	55	271	AGCCAACTTCCCAAACAAGG	58.587	20	CTGGCTGAAAAGGCTGCTAC	59.193	20	219	53	271	CCAACTTCCCAAACAAGGCT	58.587	20	GCTGAAAAGGCTGCTACGAT	58.626	20	214	55	268
scaf_0000808_5	p3	(AAT)5	15	151	165	AGGAATTTGGGAGAATGGGGT	58.989	21	TGATGCGCTACCACTACCAA	59.101	20	177	69	245	AGGAATTTGGGAGAATGGGGT	58.989	21	CGCTACCACTACCAACGAGA	59.193	20	172	69	240	GGAATTTGGGAGAATGGGGTG	58.889	21	TGATGCGCTACCACTACCAA	59.101	20	176	70	245
scaf_0000813_3	p3	(GTG)5	15	151	165	AGCCCAAATACAAGCCCAGA	59.296	20	TGCTGCTTGTTCACTTGCAT	58.966	20	175	49	223	AGCCCAAATACAAGCCCAGA	59.296	20	TTGAGAGGAGGGTTCACCAC	58.943	20	145	49	193	AGCCCAAATACAAGCCCAGA	59.296	20	ATCCACGTTTGAGAGGAGGG	59.095	20	153	49	201
scaf_0000813_5	p3	(AAT)6	18	151	168	TTGGGATTTGGTTAGGGTTCTT	57.521	22	AGAGTTTCAAGCAACACATCGA	58.533	22	167	23	189	ATTGGGATTTGGTTAGGGTTCT	57.307	22	AGAGTTTCAAGCAACACATCGA	58.533	22	168	22	189	TCGATGTGTTGCTTGAAACTCT	58.533	22	TGGGTCAATTGTTTATGTGTCG	57.242	22	102	168	269
scaf_0000814_4	p3	(ATA)8	24	151	174	AAGACCAGCCTTTCACCTGA	58.86	20	GCACCTACATTTGAGCAGCA	58.832	20	272	13	284	AAGACCAGCCTTTCACCTGA	58.86	20	TGCACCTACATTTGAGCAGC	58.832	20	273	13	285	GCCTTTCACCTGACCAAACA	58.601	20	GCACCTACATTTGAGCAGCA	58.832	20	265	20	284
scaf_0000814_11	p3	(AAT)8	24	151	174	CAAGACCTCTAGCACAAACACA	58.533	22	TGCAGTCAATAAGAAACAGCGA	58.602	22	206	100	305	TCGGAAGTCACAAAACATCCT	57.515	21	TGCAGTCAATAAGAAACAGCGA	58.602	22	100	206	305	CAAGACCTCTAGCACAAACACA	58.533	22	AGGATGTTTTGTGACTTCCGA	57.515	21	127	100	226
scaf_0000817_15	p3	(ATT)5	15	151	165	ATTTACTGCTCCCTGCTCGT	59.095	20	TTCTTGTCTATGATGCCCACA	57.001	21	115	106	220	TCTGCCATTTACTGCTCCCT	58.711	20	TTCTTGTCTATGATGCCCACA	57.001	21	121	100	220	CATTTACTGCTCCCTGCTCG	58.706	20	TTCTTGTCTATGATGCCCACA	57.001	21	116	105	220
scaf_0000817_16	p4	(AAAT)5	20	151	170	TCGGAGTCAGCCTCTTTGAA	58.662	20	CCTCGCTTACCCCACTTCTT	59.386	20	102	121	222	TATGGTGTGATGGCAAGTGC	58.537	20	CCTCGCTTACCCCACTTCTT	59.386	20	161	62	222	ATCGGAGTCAGCCTCTTTGA	58.438	20	CCTCGCTTACCCCACTTCTT	59.386	20	103	120	222
scaf_0000818_13	p3	(TCT)5	15	151	165	CTACATAACCCCCACGTGGT	59.093	20	GGTGTGGAGATGTGTATGCC	58.332	20	237	66	302	ACTACATAACCCCCACGTGG	59.093	20	GGTGTGGAGATGTGTATGCC	58.332	20	238	65	302	CATAACCCCCACGTGGTTTG	59.115	20	GGTGTGGAGATGTGTATGCC	58.332	20	234	69	302
scaf_0000824_8	p4	(TTTA)5	20	151	170	ACTTACGGTCTTTGGTAATGACC	58.427	23	TGCTGTGGTTACTTTGCACG	59.34	20	247	24	270	ACTTACGGTCTTTGGTAATGACC	58.427	23	GTGGTTACTTTGCACGGCTA	58.485	20	243	24	266	ACTTACGGTCTTTGGTAATGACC	58.427	23	TGTGGTTACTTTGCACGGC	58.973	19	244	24	267
scaf_0000829_1	p3	(CAC)5	15	151	165	ACCATCACCACCACCATCAT	58.998	20	GCGACAGCGTTGGTGATAAT	58.993	20	189	109	297	ACCACCACCACCACCATTAT	58.919	20	GCGACAGCGTTGGTGATAAT	58.993	20	147	151	297	ACCATCACCACCACCATCAT	58.998	20	AATGGTGGTGTGGTGGTAGT	58.854	20	172	109	280
scaf_0000829_1	p3	(ACC)5	15	300	314	ACCATCACCACCACCATCAT	58.998	20	GCGACAGCGTTGGTGATAAT	58.993	20	189	109	297	ACCACCACCACCACCATTAT	58.919	20	GCGACAGCGTTGGTGATAAT	58.993	20	147	151	297	ACCATCACCACCACCATCAT	58.998	20	AATGGTGGTGTGGTGGTAGT	58.854	20	172	109	280
scaf_0000829_2	p3	(CAC)5	15	2	16	ACCACCACCACCACCATTAT	58.919	20	GCGACAGCGTTGGTGATAAT	58.993	20	147	2	148	ACCACCACCACCACCATTAT	58.919	20	ATGGTGGTGGTAGTGTTGGT	58.854	20	224	2	225	ACCACCACCACCACCATTAT	58.919	20	ATGGTGATGGTTGTGGCATG	58.812	20	185	2	186
scaf_0000829_2	p3	(ACC)6	18	151	168	ACCACCACCACCACCATTAT	58.919	20	GCGACAGCGTTGGTGATAAT	58.993	20	147	2	148	ACCACCACCACCACCATTAT	58.919	20	ATGGTGGTGGTAGTGTTGGT	58.854	20	224	2	225	ACCACCACCACCACCATTAT	58.919	20	ATGGTGATGGTTGTGGCATG	58.812	20	185	2	186
scaf_0000833_7	p3	(ATG)7	21	151	171	TGATTGTGATGGACGGTGGA	59.02	20	TCCTCCACCAATAGCCCAAA	58.622	20	264	17	280	TGATTGTGATGGACGGTGGA	59.02	20	ATCCTCCACCAATAGCCCAA	58.393	20	265	17	281	TGATTGTGATGGACGGTGGA	59.02	20	AGCTATCCTCCACCAATAGCC	59.019	21	269	17	285
scaf_0000834_1	p3	(AAG)6	18	151	168	ACTCCTACTGCAACCTGACC	59.023	20	ACTGCTCTGACAGATGCCTT	59.017	20	141	109	249	ACTCCTACTGCAACCTGACC	59.023	20	ATGACAAGCTCACTAGGGGG	58.792	20	108	109	216	CTCCTACTGCAACCTGACCT	58.729	20	ACTGCTCTGACAGATGCCTT	59.017	20	140	110	249
scaf_0000836_22	p4	(AAAT)5	20	151	170	ATGCCAATAGGTTGCCAAGC	59.174	20	TGAGTCAGTGTTTGGTCCCT	58.493	20	113	12	124	ATGCCAATAGGTTGCCAAGC	59.174	20	GTGAGTCAGTGTTTGGTCCC	58.406	20	114	12	125	GCCAATAGGTTGCCAAGCAA	59.392	20	TGAGTCAGTGTTTGGTCCCT	58.493	20	111	14	124
scaf_0000836_23	p3	(ATA)13	39	151	189	ACGTGAATGGTGTGAAAGGA	57.369	20	AGGGGCACACCATTATGAGT	58.701	20	276	48	323	ACGTGAATGGTGTGAAAGGA	57.369	20	GGGGCACACCATTATGAGTG	58.607	20	275	48	322	AACGTGAATGGTGTGAAAGGA	58.074	21	AGGGGCACACCATTATGAGT	58.701	20	277	47	323
scaf_0000838_16	p4	(TTAT)5	20	151	170	TGTGGGGTTGGAACTCTTGT	59.077	20	AATCCCCAGCATCTCTCAGG	58.861	20	101	186	286	GTGTGGGGTTGGAACTCTTG	58.681	20	AATCCCCAGCATCTCTCAGG	58.861	20	102	185	286	TGTGGGGTTGGAACTCTTGT	59.077	20	CCAAGCTCACATACGCTGTT	58.557	20	134	186	319
scaf_0000838_25	p3	(TCT)5	15	1	15	TCCTTCTACTAGTTGGACCCC	57.888	21	ACCTCGCAGCAATTTTGTGT	58.968	20	104	204	307	CCTTCTACTAGTTGGACCCCT	57.882	21	ACCTCGCAGCAATTTTGTGT	58.968	20	103	205	307	TCTACTAGTTGGACCCCTACG	57.712	21	ACCTCGCAGCAATTTTGTGT	58.968	20	100	208	307
scaf_0000841_2	p4	(CTTT)8	32	151	182	AGCAAACGGAACTAAAGCAGT	58.428	21	TGTGGGGTTCTGGTTGTCTT	59.077	20	261	6	266	AGCAAACGGAACTAAAGCAGT	58.428	21	TTGTGGGGTTCTGGTTGTCT	59.077	20	262	6	267	AGCAAACGGAACTAAAGCAGT	58.428	21	GTTTGTGGGGTTCTGGTTGT	58.519	20	264	6	269
scaf_0000841_3	p4	(TTTC)8	32	1	32	AGACAACCAGAACCCCACAA	59.077	20	AGCTTTGGTTTGCGCAGTTA	58.971	20	261	97	357	AGACAACCAGAACCCCACAA	59.077	20	TAGCTTTGGTTTGCGCAGTT	58.971	20	262	97	358	AAGACAACCAGAACCCCACA	59.077	20	AGCTTTGGTTTGCGCAGTTA	58.971	20	262	96	357
scaf_0000841_4	p3	(CTC)6	18	151	168	AACTGCGCAAACCAAAGCTA	58.971	20	TTGAGCAACGGAAAATGGCA	58.964	20	107	82	188	TAACTGCGCAAACCAAAGCT	58.971	20	TTGAGCAACGGAAAATGGCA	58.964	20	108	81	188	AACTGCGCAAACCAAAGCTA	58.971	20	CGTGGTTCGTGGATTTGTGT	59.058	20	130	82	211
scaf_0000845_1	p3	(CAT)7	21	151	171	ACATTGTTGAAAGCCTCGGG	58.752	20	CCTCCAAAACTTCAACCGGG	59.041	20	185	38	222	ACATTGTTGAAAGCCTCGGG	58.752	20	TTCAACCGGGTAGATGGCAT	59.084	20	175	38	212	ACATTGTTGAAAGCCTCGGG	58.752	20	GATGGCATCCACCAAAAGCA	59.103	20	163	38	200
scaf_0000846_16	p3	(TTC)7	21	151	171	TCTTCTTCTTCTTCCTCCCTCT	57.588	22	TCTTCTAGGGTTTGGGGTTTCA	58.942	22	107	157	263	TCTTCTTCTTCTTCCTCCCTCT	57.588	22	ACTTTCTTCTAGGGTTTGGGGT	58.939	22	111	157	267	TTCTTCTTCTTCTTCCTCCCTCT	58.242	23	TCTTCTAGGGTTTGGGGTTTCA	58.942	22	108	156	263
scaf_0000848_9	p3	(TAA)8	24	151	174	GATACCATGACCCACGTTGC	58.986	20	GTGGCCAGTCGATTGTGTTT	59.048	20	156	82	237	GATACCATGACCCACGTTGC	58.986	20	TTGTCGATTGTGGCCTGTTG	59.049	20	242	82	323	CCAATTGCGCCATGATACCA	58.969	20	GTGGCCAGTCGATTGTGTTT	59.048	20	169	69	237
scaf_0000849_1	p4	(TAGT)7	28	151	178	ACTTCGTGAGAGCGCTATGT	59.188	20	TGCTAAACAAAACATGATGCCC	58.076	22	114	191	304	CTCTACTTCGTGAGAGCGCT	59.27	20	TGCTAAACAAAACATGATGCCC	58.076	22	118	187	304	ACTTCGTGAGAGCGCTATGT	59.188	20	GCTAAACAAAACATGATGCCCT	57.808	22	113	191	303
scaf_0000849_9	p4	(TAAT)5	20	151	170	TGCAGATCTTTGTGAAAACCCT	58.435	22	TCACACAAACGCCTCATCTC	58.204	20	102	193	294	TGCAGATCTTTGTGAAAACCCT	58.435	22	CACACAAACGCCTCATCTCT	58.199	20	101	193	293	TGCAGATCTTTGTGAAAACCCT	58.435	22	ACAAATCACACAAACGCCTCA	58.979	21	107	193	299
scaf_0000849_14	p3	(TTC)5	15	151	165	CGCCAGCAACATACCTTCTC	58.99	20	CTGCAATGAGAAGAGGTCGC	58.995	20	162	98	259	TCCGGTCAACCACTAAGCTT	58.947	20	CTGCAATGAGAAGAGGTCGC	58.995	20	226	34	259	CGCCAGCAACATACCTTCTC	58.99	20	AAAGAAGACAGCACAGCAGC	59.05	20	116	98	213
scaf_0000850_6	p3	(TTC)6	18	151	168	CACCTTTTGAGACCTTGCCC	59.038	20	ATGGCTGCTCTGAAGGAGTT	59.01	20	268	20	287	CACCTTTTGAGACCTTGCCC	59.038	20	TGTGCTGCCATTCCTATCCA	59.082	20	206	20	225	CACCTTTTGAGACCTTGCCC	59.038	20	GTTGGATGGCTGCTCTGAAG	58.907	20	273	20	292
scaf_0000850_17	p3	(GGT)5	15	151	165	AGTGGTGACGGTAGGTGATG	59.104	20	TCACCATCACCCACTACCAC	59.019	20	161	70	230	AGTGGTGACGGTAGGTGATG	59.104	20	GTCACCATCACCCACTACCA	59.019	20	162	70	231	AGTGGTGACGGTAGGTGATG	59.104	20	TATCCACCACCATCACCACC	59.084	20	199	70	268
scaf_0000850_17	p3	(GGT)6	18	290	307	AGTGGTGACGGTAGGTGATG	59.104	20	TCACCATCACCCACTACCAC	59.019	20	161	70	230	AGTGGTGACGGTAGGTGATG	59.104	20	GTCACCATCACCCACTACCA	59.019	20	162	70	231	AGTGGTGACGGTAGGTGATG	59.104	20	TATCCACCACCATCACCACC	59.084	20	199	70	268
scaf_0000850_18	p3	(GGT)5	15	12	26	GTAACGAGTGGGTGGTGGT	59.25	19	TATCCACCACCATCACCACC	59.084	20	129	1	129	TAACGAGTGGGTGGTGGTG	59.25	19	TATCCACCACCATCACCACC	59.084	20	128	2	129	GTAACGAGTGGGTGGTGGT	59.25	19	CCATCGTCACCTATCCACCA	58.88	20	140	1	140
scaf_0000850_18	p3	(GGT)6	18	151	168	GTAACGAGTGGGTGGTGGT	59.25	19	TATCCACCACCATCACCACC	59.084	20	129	1	129	TAACGAGTGGGTGGTGGTG	59.25	19	TATCCACCACCATCACCACC	59.084	20	128	2	129	GTAACGAGTGGGTGGTGGT	59.25	19	CCATCGTCACCTATCCACCA	58.88	20	140	1	140
scaf_0000851_2	p4	(TTTA)7	28	151	178	AGGCCCAAAACATTGCATCT	58.352	20	CACAACAGCAGCCCTATGTT	58.462	20	268	25	292	AGAGGCCCAAAACATTGCAT	58.352	20	CACAACAGCAGCCCTATGTT	58.462	20	270	23	292	AGGCCCAAAACATTGCATCT	58.352	20	CAGCAGCCCTATGTTTGGTT	58.451	20	263	25	287
scaf_0000853_28	p3	(AAC)5	15	151	165	GTAGGAAGGGAATTGGGCCT	59.073	20	TGTTTGCACAAGCTCCACAA	58.819	20	105	49	153	GTAGGAAGGGAATTGGGCCT	59.073	20	TTGTTTGCACAAGCTCCACA	58.819	20	106	49	154	GTAGGAAGGGAATTGGGCCT	59.073	20	TGTTGTTTGCACAAGCTCCA	58.819	20	108	49	156
scaf_0000853_29	p3	(AAC)5	15	16	30	TGGAGCTTGTGCAAACAACA	58.819	20	GCTCTCTTAGTCTCCGCCAT	58.963	20	266	2	267	TGTGGAGCTTGTGCAAACAA	58.819	20	GCTCTCTTAGTCTCCGCCAT	58.963	20	268	0	267	TGGAGCTTGTGCAAACAACA	58.819	20	CATCACCACTACGGCTCTCT	58.893	20	279	2	280
scaf_0000855_19	p3	(AAG)8	24	281	304	GGTCTTCTTTGCGCAGTTCA	59.056	20	GCCTCTGGTGTGGTGACATA	59.387	20	153	66	218	GGTCTTCTTTGCGCAGTTCA	59.056	20	TTTTGGTGAGCCTCTGGTGT	59.449	20	162	66	227	AGGTCTTCTTTGCGCAGTTC	58.77	20	GCCTCTGGTGTGGTGACATA	59.387	20	154	65	218
scaf_0000859_3	p3	(GTG)6	18	151	168	ATATGTGTCGTGGTGGTGGT	59.019	20	TAACCAACGACCTCACACCA	58.879	20	134	141	274	TTCGTCTTTGACTTCGTGCC	58.786	20	ACCACCACCACGACACATAT	59.019	20	153	8	160	TAGAAGCCCCATCACTGAGC	59.167	20	AATTCTCCATTGCCGTGTCG	58.913	20	144	68	211
scaf_0000859_17	p3	(CAA)5	15	151	165	CCAACTTACCCAACACCACC	58.676	20	GGGCTTTGAAGAAGGCGAAA	59.041	20	101	208	308	AACCCATCACACCAAAACCC	58.581	20	GGTTTTGCATAATTGGCGGC	58.994	20	248	17	264	ACAACAACAACAACCACCGG	59.472	20	GGTTTTGCATAATTGGCGGC	58.994	20	113	152	264
scaf_0000859_19	p3	(ATC)10	30	151	180	TTTGTTTTGTTGCCTCCCCC	59.166	20	TGCCCGGTTTTTGTTACTGG	58.966	20	231	92	322	TTTGTTTTGTTGCCTCCCCC	59.166	20	GCCCGGTTTTTGTTACTGGT	58.966	20	230	92	321	TTTGTTTTGTTGCCTCCCCC	59.166	20	ACTCCTGGGGCAAAGAACTT	59.146	20	152	92	243
scaf_0000860_14	p3	(AAT)8	24	151	174	GTTACCTACCCTCAGGACCG	58.89	20	TCGTCCTCCTACCTAATCACA	57.343	21	197	61	257	GGCCTCTGTTACCTACCCTC	58.879	20	TCGTCCTCCTACCTAATCACA	57.343	21	204	54	257	CAGGACCGGGCTTGTTTAAG	58.835	20	TCGTCCTCCTACCTAATCACA	57.343	21	185	73	257
scaf_0000861_6	p4	(AAAT)5	20	151	170	TGCCATTTTGGGAACATGGT	58.273	20	ACTGCATTTTTGGCACTTGC	58.415	20	107	14	120	GTGCCATTTTGGGAACATGG	57.902	20	ACTGCATTTTTGGCACTTGC	58.415	20	108	13	120	TGCCATTTTGGGAACATGGT	58.273	20	AACTGCATTTTTGGCACTTGC	59.058	21	108	14	121
scaf_0000861_22	p4	(TTAT)5	20	151	170	CCAAGCCATGGCGATAATGT	58.679	20	TGCAAAACAGTGATGGCCAA	58.882	20	196	48	243	CCAAGCCATGGCGATAATGT	58.679	20	TTGCAAAACAGTGATGGCCA	58.882	20	197	48	244	CCAAGCCATGGCGATAATGT	58.679	20	GTTGCAAAACAGTGATGGCC	58.499	20	198	48	245
scaf_0000862_15	p3	(CTT)6	18	313	330	ACCCCAAAAGTCCTTCCCAA	59.062	20	CTGACTGGCAACTGCAATCA	58.759	20	142	103	244	AACCCCAAAAGTCCTTCCCA	59.062	20	CTGACTGGCAACTGCAATCA	58.759	20	143	102	244	ACCCCAAAAGTCCTTCCCAA	59.062	20	ACTGACTGGCAACTGCAATC	58.758	20	143	103	245
scaf_0000862_16	p3	(CTT)9	27	151	177	TGATTGCAGTTGCCAGTCAG	58.759	20	GAACCGGGTTTTTGGTGGAA	58.887	20	252	63	314	ATTGCAGTTGCCAGTCAGTC	58.758	20	GAACCGGGTTTTTGGTGGAA	58.887	20	250	65	314	GATTGCAGTTGCCAGTCAGT	58.758	20	GAACCGGGTTTTTGGTGGAA	58.887	20	251	64	314
scaf_0000862_26	p4	(TTTA)5	20	151	170	TGTCCATCCTTGTGCCTACA	58.643	20	ACCCCTTTCACCTACTGTGG	58.935	20	182	96	277	TGTCCATCCTTGTGCCTACA	58.643	20	GGCCATCGACTGTTTTAGCC	59.267	20	145	96	240	TGTCCATCCTTGTGCCTACA	58.643	20	GCTTGGCCATCGACTGTTTT	59.402	20	149	96	244
scaf_0000864_1	p3	(CTG)5	15	151	165	GTCCTCAGATCGACCTCCTG	58.971	20	AATGGGAGCAACGGTAGGAA	59.011	20	197	15	211	CTCAGGACGGTCCTCAGATC	58.971	20	AATGGGAGCAACGGTAGGAA	59.011	20	206	6	211	TCCTCAGATCGACCTCCTGA	59.08	20	AATGGGAGCAACGGTAGGAA	59.011	20	196	16	211
scaf_0000865_13	p4	(TAAA)5	20	151	170	TCTCCCATTGAGCATGACCT	58.412	20	TGTTTTAGACGCGTACAAGTGA	58.295	22	213	13	225	CCCATTGAGCATGACCTTGT	58.157	20	TGTTTTAGACGCGTACAAGTGA	58.295	22	210	16	225	CGTTGTGGATGAACCTGTGA	58.122	20	TGTTTTAGACGCGTACAAGTGA	58.295	22	167	59	225
scaf_0000866_17	p3	(ATT)6	18	151	168	TGTTGACGGTATGCTCCACT	59.026	20	CACATGTTCATATGCCCCATCA	58.776	22	112	200	311	TGTTGACGGTATGCTCCACT	59.026	20	TCACATGTTCATATGCCCCATC	58.511	22	113	200	312	TGTTGACGGTATGCTCCACT	59.026	20	ACATGTTCATATGCCCCATCA	57.401	21	111	200	310
scaf_0000868_5	p3	(TGG)5	15	151	165	CACAGATTTGGCCTCCATCG	58.98	20	CGCCCTTTACTCCTCTTCCA	59.097	20	210	12	221	TGGTTGTAGCAGCAGAGGAA	58.944	20	ACATCGATTTGCTTCCGGTG	58.913	20	256	42	297	TGGTTGTAGCAGCAGAGGAA	58.944	20	CGCCCTTTACTCCTCTTCCA	59.097	20	180	42	221
scaf_0000868_9	p3	(TAA)6	18	151	168	CCGGTCGGATAAAAGATCCA	57.097	20	TAGGGGTTGAGGCCTCTCTA	58.684	20	148	0	147	CCGGTCGGATAAAAGATCCA	57.097	20	ATTAGGGGTTGAGGCCTCTC	58.487	20	150	0	149	CGGTCGGATAAAAGATCCAAGG	58.869	22	TAGGGGTTGAGGCCTCTCTA	58.684	20	147	1	147
scaf_0000873_2	p3	(ATT)5	15	151	165	CAAGGCCGTTCTGTCTGATG	58.918	20	CCTCCGAGCTGATCACCTAC	59.329	20	187	36	222	CAAGGCCGTTCTGTCTGATG	58.918	20	CTCCGAGCTGATCACCTACA	58.606	20	186	36	221	TCTGTCATATGTTGGGCCCA	58.706	20	CCTCCGAGCTGATCACCTAC	59.329	20	205	18	222
scaf_0000875_3	p3	(TGT)7	21	151	171	CGTGGAGGGTTTGCTGTAAG	58.843	20	GTTGCTTGTGTTCCCCAGTT	58.889	20	101	128	228	CGTGGAGGGTTTGCTGTAAG	58.843	20	CAGAGGATGGGTTGCTTGTG	58.829	20	111	128	238	CGTGGAGGGTTTGCTGTAAG	58.843	20	CTGCACAACAGTGGAGTGAG	58.776	20	132	128	259
scaf_0000875_13	p3	(TTA)6	18	151	168	GCATGCAAATACCAGCTCTCA	58.981	21	GCAGACACAATTCATTTTGGGC	59.262	22	260	40	299	TGCATGCAAATACCAGCTCTC	58.981	21	GCAGACACAATTCATTTTGGGC	59.262	22	261	39	299	TGCATGCAAATACCAGCTCT	57.867	20	GCAGACACAATTCATTTTGGGC	59.262	22	261	39	299
scaf_0000880_1	p3	(AGA)6	18	151	168	TCCGAGCAAAGGGAGAGAAA	58.652	20	TTGGAAAAGCTGGCCAGAAC	58.96	20	104	35	138	TCCGAGCAAAGGGAGAGAAA	58.652	20	GTTGGAAAAGCTGGCCAGAA	58.96	20	105	35	139	TCCGAGCAAAGGGAGAGAAA	58.652	20	ACCCAAAATCTTCTGCGTGG	58.752	20	168	35	202
scaf_0000880_15	p4	(GAAA)5	20	151	170	GAAACGGTTGTCCTTGCTGT	58.978	20	TTTGGCCCACCCTTTCCTAT	58.911	20	179	20	198	TGTCCTTGCTGTGTCGGTAT	59.026	20	TTTGGCCCACCCTTTCCTAT	58.911	20	171	28	198	GAAACGGTTGTCCTTGCTGT	58.978	20	TCTCTTTGAAGCCTCTCCGG	59.102	20	232	20	251
scaf_0000885_9	p3	(GGT)5	15	151	165	CTCCCTTCTGTGAGCAGGAA	59.02	20	CCCAACCACAGCAGTCTAGA	59.023	20	132	181	312	CTCCCTTCTGTGAGCAGGAA	59.02	20	TCCCAACCACAGCAGTCTAG	59.023	20	133	181	313	GAAAAGGCCTTGTGACCTGG	59.038	20	CCCAACCACAGCAGTCTAGA	59.023	20	115	198	312
scaf_0000891_9	p3	(TAT)5	15	151	165	GCCACTATTTTCAAAACCACCAC	58.945	23	GCTGTTTCCGGCATTAAAGTTG	59.014	22	280	35	314	GCCACTATTTTCAAAACCACCAC	58.945	23	TGTTTCCGGCATTAAAGTTGGT	59.04	22	278	35	312	GCCACTATTTTCAAAACCACCAC	58.945	23	TCCGGCATTAAAGTTGGTTTGA	58.777	22	274	35	308
scaf_0000891_12	p3	(ACC)9	27	151	177	ACCACCACCACCACTGTTAT	58.854	20	CAATGGCATGGTGGTGGTAG	58.895	20	144	165	308	CCGCCATTACCACCACATTC	59.262	20	CAATGGCATGGTGGTGGTAG	58.895	20	101	208	308	ACCACCACCACCACTGTTAT	58.854	20	GGTGGTAGCAGTGCAATGTT	58.752	20	132	165	296
scaf_0000893_1	p4	(ATTT)8	32	151	182	GCACCCTCTTTTCTCTCCCT	59.012	20	ATTCGGCCACCTTTCCTTTC	58.454	20	251	30	280	GCACCCTCTTTTCTCTCCCT	59.012	20	GATTCGGCCACCTTTCCTTT	58.454	20	252	30	281	AGCACCCTCTTTTCTCTCCC	59.012	20	ATTCGGCCACCTTTCCTTTC	58.454	20	252	29	280
scaf_0000893_2	p4	(ATTT)7	28	1	28	AAAGGAAAGGTGGCCGAATC	58.454	20	CACATCCCAAACAACCACTAAA	57.072	22	206	108	313	GAAAGGAAAGGTGGCCGAAT	58.454	20	CACATCCCAAACAACCACTAAA	57.072	22	207	107	313	ATTGGAAAGGAAAGGTGGCC	58.355	20	CACATCCCAAACAACCACTAAA	57.072	22	211	103	313
scaf_0000893_7	p4	(TTAT)5	20	151	170	CCCTCTCCTCTCTCCCTCTT	59.066	20	GAGGCACGCATACAAACACA	59.128	20	208	32	239	CCCTCTCCTCTCTCCCTCTT	59.066	20	CAAGGAGGCACGCATACAAA	58.836	20	212	32	243	CCCTCTCCTCTCTCCCTCTT	59.066	20	AAGGAGGCACGCATACAAAC	58.835	20	211	32	242
scaf_0000893_8	p4	(TTAT)5	20	16	35	TGTGTTTGTATGCGTGCCTC	59.128	20	AGTCAGAGGATAGTAGGGAACA	57.117	22	148	85	232	TTTGTATGCGTGCCTCCTTG	58.836	20	AGTCAGAGGATAGTAGGGAACA	57.117	22	144	89	232	GTTTGTATGCGTGCCTCCTT	58.835	20	AGTCAGAGGATAGTAGGGAACA	57.117	22	145	88	232
scaf_0000893_20	p3	(ATA)7	21	151	171	ATGGAGAATCAAATGCGGGC	58.965	20	ACTTCGGCCCAATTTTTAACCT	58.764	22	246	18	263	ATGGAGAATCAAATGCGGGC	58.965	20	GCTTAAATTCTACTTCGGCCCA	58.724	22	257	18	274	GGGCCCGATATCCATACCTT	58.714	20	ACTTCGGCCCAATTTTTAACCT	58.764	22	230	34	263
scaf_0000894_1	p3	(CAA)6	18	151	168	GGGGACTAATTTGGGGACGA	59.086	20	TTACATCCACAAAGCCGCTC	58.551	20	270	40	309	AGCTTCTTGTCCCGTCTCTC	59.108	20	TTACATCCACAAAGCCGCTC	58.551	20	234	76	309	GAGCTTCTTGTCCCGTCTCT	59.108	20	TTACATCCACAAAGCCGCTC	58.551	20	235	75	309
scaf_0000894_18	p3	(GGT)5	15	151	165	TTAAGAGCTCGGTGGTGGTT	58.947	20	CACCACCTCCATCTTGGTCT	59.013	20	134	23	156	TTTAAGAGCTCGGTGGTGGT	58.947	20	CACCACCTCCATCTTGGTCT	59.013	20	135	22	156	GTTTGTGGTGTTGGCGAGAT	59.048	20	GCACCTTCTCCTTGTCTCCT	59.02	20	116	78	193
scaf_0000899_3	p3	(AAT)8	24	151	174	AGGCTAAAGGATGCAGGTGT	59.005	20	TTCACAGACTGCACTTCACA	57.31	20	204	109	312	GGATGCAGGTGTACCCTCTT	59.088	20	TTCACAGACTGCACTTCACA	57.31	20	196	117	312	AAGGATGCAGGTGTACCCTC	59.088	20	TTCACAGACTGCACTTCACA	57.31	20	198	115	312
scaf_0000899_9	p4	(AATA)5	20	151	170	ATTGGTTTGGCATTCCCTGT	57.971	20	TGTGGGGCACAATTTGAAGT	58.213	20	118	119	236	ATTGGTTTGGCATTCCCTGT	57.971	20	GTGGGGCACAATTTGAAGTCT	59.036	21	117	119	235	ATTGGTTTGGCATTCCCTGT	57.971	20	TGGGGCACAATTTGAAGTCTG	59.037	21	116	119	234
scaf_0000899_10	p4	(AATA)5	20	12	31	ACTTCAAATTGTGCCCCACA	58.213	20	CCAGTGCGATACTTGGTCAC	58.64	20	165	78	242	ACTTCAAATTGTGCCCCACA	58.213	20	ATGTGCCAGTGCGATACTTG	58.627	20	170	78	247	AGACTTCAAATTGTGCCCCAC	59.036	21	CCAGTGCGATACTTGGTCAC	58.64	20	167	76	242
scaf_0000899_15	p3	(AAT)5	15	151	165	TGCTCATCGAACACATCACA	57.546	20	TGCGCGCAAACAACAAATTT	58.998	20	185	91	275	TGCTCATCGAACACATCACA	57.546	20	TTGCGCGCAAACAACAAATT	58.998	20	186	91	276	GACCCACTGCAACAATATCCA	58.278	21	TGCGCGCAAACAACAAATTT	58.998	20	157	119	275
scaf_0000904_18	p3	(TAT)6	18	151	168	CTGAGAAACTATTCACCACTTGC	57.711	23	ACTTCCCAAACGGAGGCTAA	58.938	20	235	28	262	CTGAGAAACTATTCACCACTTGC	57.711	23	CCAATCCACTTCCCAAACGG	59.112	20	242	28	269	CTGAGAAACTATTCACCACTTGC	57.711	23	GCCAAAAAGCCAAAAAGCCA	58.612	20	259	28	286
scaf_0000905_12	p3	(GAA)11	33	151	183	TGGTTGGATGGCTGCTCTAA	59.009	20	TCTTCCTCCCCAACCTTAGC	58.714	20	126	29	154	TTGGTTGGATGGCTGCTCTA	59.009	20	TCTTCCTCCCCAACCTTAGC	58.714	20	127	28	154	TGGTTGGATGGCTGCTCTAA	59.009	20	GTAGGAACTTCGGCATCAGC	58.709	20	207	29	235
scaf_0000907_7	p3	(GGA)8	24	151	174	GGAAGTGATAGCGAGGACGA	58.977	20	CCGCAAGAACCTCAAAACCA	58.971	20	163	34	196	GGAAGTGATAGCGAGGACGA	58.977	20	AATCCCCTTCACACCTCTCG	59.095	20	108	34	141	GGAAGTGATAGCGAGGACGA	58.977	20	TTCACACCTCTCGCTACAGG	59.111	20	101	34	134
scaf_0000908_8	p3	(ATG)6	18	151	168	TGTAGCAGAGCGGAGTGATT	58.814	20	ACCACCACCACCATCATCAT	58.998	20	156	23	178	CTGTAGCAGAGCGGAGTGAT	59.256	20	ACCACCACCACCATCATCAT	58.998	20	157	22	178	TAGCAGAGCGGAGTGATTCG	59.618	20	ACCACCACCACCATCATCAT	58.998	20	154	25	178
scaf_0000908_15	p3	(TTG)5	15	151	165	CCGTGGCCATGTCAAATTCA	59.113	20	GTCAAGAAGCCTTAACAAGATGC	58.273	23	103	14	116	CCGTGGCCATGTCAAATTCA	59.113	20	CAAGAAGCCTTAACAAGATGCA	57.228	22	101	14	114	CCGTGGCCATGTCAAATTCA	59.113	20	TGTCTGTTCAACATGTATCTCCC	58.168	23	217	14	230
scaf_0000910_4	p3	(TAT)7	21	151	171	ACAGAGCATAGAGGTAACAGAGA	58.139	23	TGTGGGTGTTGGATATTGCT	57.103	20	203	46	248	ACAGAGCATAGAGGTAACAGAGA	58.139	23	TGTGGGTGTTGGATATTGCTTC	58.911	22	203	46	248	ACAGAGCATAGAGGTAACAGAGA	58.139	23	TGTGGGTGTTGGATATTGCTT	57.832	21	203	46	248
scaf_0000910_9	p3	(TAA)6	18	151	168	CGAACGCTTACTGAGTCAAGT	58.337	21	TGAGTGGGGACAAGTATGATGT	58.819	22	149	60	208	TCGAACGCTTACTGAGTCAAG	58.07	21	TGAGTGGGGACAAGTATGATGT	58.819	22	150	59	208	CGAACGCTTACTGAGTCAAGTT	58.949	22	TGAGTGGGGACAAGTATGATGT	58.819	22	149	60	208
scaf_0000911_6	p3	(TTG)11	33	151	183	GGTGGTCTGTTTACAGCAGC	59.125	20	GGTAATCACCCTCTTTTTGGTCA	58.596	23	178	127	304	CGGTGGTCTGTTTACAGCAG	58.852	20	GGTAATCACCCTCTTTTTGGTCA	58.596	23	179	126	304	GGTGGTCTGTTTACAGCAGC	59.125	20	TCACCCTCTTTTTGGTCAGATT	57.547	22	173	127	299
scaf_0000911_7	p3	(TGT)9	27	1	27	TGGAAGGTCACCAGTTGGAA	58.782	20	GACACCACAAAGTCTCACCA	57.674	20	113	200	312	TGGAAGGTCACCAGTTGGAA	58.782	20	TGACACCACAAAGTCTCACC	57.674	20	114	200	313	TTGGAAGGTCACCAGTTGGA	58.782	20	GACACCACAAAGTCTCACCA	57.674	20	114	199	312
scaf_0000913_5	p3	(CTT)5	15	151	165	TATGAAACGTTGACGCGGAC	58.938	20	GCTGAGGCCATTCCAACAAT	58.811	20	231	38	268	TATGAAACGTTGACGCGGAC	58.938	20	AGACAATTGAGCTGAGGCCA	59.305	20	241	38	278	AATGCAAAACGCGGACAAAC	58.795	20	GCTGAGGCCATTCCAACAAT	58.811	20	198	71	268
scaf_0000913_10	p3	(AAT)6	18	151	168	TGCTCTTGATGCAAGGGGTA	59.009	20	TTGAGACAGTAGGGGCAGTG	59.023	20	197	85	281	ACGCATCCACAAATGTTGCT	59.039	20	TTGAGACAGTAGGGGCAGTG	59.023	20	213	69	281	TGCTCTTGATGCAAGGGGTA	59.009	20	TCTTGTTCAGCCGCTTCAAC	59.056	20	158	85	242
scaf_0000913_23	p3	(AAG)8	24	151	174	AAGCCTTGGGTACGGATTCT	58.714	20	AGACCCATTTCTTGCACTTTCA	58.435	22	106	210	315	AAGCCTTGGGTACGGATTCT	58.714	20	TCAAAGACCCATTTCTTGCACT	58.435	22	110	210	319	GTGAGAGTGTGTGTTGTGTAGT	58.218	22	AGAATCCGTACCCAAGGCTT	58.714	20	230	0	229
scaf_0000914_20	p4	(AAAT)5	20	151	170	TTTGAGAGATCGGGGCAAGT	59.016	20	TTCTCCCTACTCTCCTGCAG	57.848	20	100	33	132	TTGAGAGATCGGGGCAAGTT	59.016	20	ATTCTCCCTACTCTCCTGCAG	58.323	21	100	34	133	TTTGAGAGATCGGGGCAAGT	59.016	20	ATTCTCCCTACTCTCCTGCAG	58.323	21	101	33	133
scaf_0000917_24	p4	(GTTT)5	20	151	170	ACAGAGTCAACTCAAGCGAGA	59.043	21	GAGAAGGAGTCACTGGCACT	59.027	20	113	2	114	ACAGAGTCAACTCAAGCGAGA	59.043	21	AGAAGGAGTCACTGGCACTG	59.316	20	112	2	113	ACAGAGTCAACTCAAGCGAGA	59.043	21	TGAGAAGGAGTCACTGGCAC	59.318	20	114	2	115
scaf_0000918_7	p3	(GTG)6	18	151	168	GTGATGGTGGTGGTAGTGGT	59.309	20	TACTACCACCACCACACCAC	58.95	20	189	105	293	TGTGATGGTGGTGGTAGTGG	59.31	20	TACTACCACCACCACACCAC	58.95	20	190	104	293	TGATGGTGGTGGTAGTGGTG	59.31	20	ACCACCACCATCACCATCTT	58.924	20	170	106	275
scaf_0000922_6	p3	(AAT)11	33	151	183	TGGTCATTTAAACGGTCGCC	58.842	20	GCCCCGATCCACTTTCATCT	59.819	20	278	34	311	TGGTCATTTAAACGGTCGCC	58.842	20	AGCCCCGATCCACTTTCATC	59.819	20	279	34	312	TGGTCATTTAAACGGTCGCC	58.842	20	GAGCCCCGATCCACTTTCAT	59.819	20	280	34	313
scaf_0000924_13	p3	(AGG)9	27	8	34	GGAGGAGGAGGAGGAGGTAA	59.065	20	CCATGGCCTTAGTGACTGGA	59.088	20	194	17	210	GGAGGAGGAGGAGGAGGTAA	59.065	20	CTTTGGGTCATGGCCAAGAC	59.109	20	226	17	242	GGAGGAGGAGGAGGAGGTAA	59.065	20	AACGATCGACCATGGCCTTA	59.172	20	203	17	219
scaf_0000924_21	p3	(GTG)5	15	151	165	GGAAAGTGGTGGCAAGTAGC	59.118	20	ATCCACCACCATCACCCAC	59.309	19	222	0	221	GGAAAGTGGTGGCAAGTAGC	59.118	20	ACCATCCACCACCATCACC	59.309	19	225	0	224	GGAAAGTGGTGGCAAGTAGC	59.118	20	CATCCACCACCATCACCCA	59.309	19	223	0	222
scaf_0000926_8	p4	(TTCT)7	28	151	178	TCTTTTTGGGGGCACAATGG	58.945	20	GGTGTTTTGGTGGCTATGCA	59.035	20	173	102	274	GGGGGCACAATGGTCTTTTT	58.944	20	GGTGTTTTGGTGGCTATGCA	59.035	20	166	109	274	TCTTTTTGGGGGCACAATGG	58.945	20	AGGTGGTGATGTTTGGAGGT	58.851	20	151	102	252
scaf_0000926_8	p3	(CAC)5	15	283	297	TCTTTTTGGGGGCACAATGG	58.945	20	GGTGTTTTGGTGGCTATGCA	59.035	20	173	102	274	GGGGGCACAATGGTCTTTTT	58.944	20	GGTGTTTTGGTGGCTATGCA	59.035	20	166	109	274	TCTTTTTGGGGGCACAATGG	58.945	20	AGGTGGTGATGTTTGGAGGT	58.851	20	151	102	252
scaf_0000926_9	p4	(TTCT)7	28	19	46	TGCATAGCCACCAAAACACC	59.035	20	GGTAGAGCGGCTTGATTTGG	58.983	20	110	123	232	TGCATAGCCACCAAAACACC	59.035	20	GGGTAGAGCGGCTTGATTTG	58.983	20	111	123	233	TGCATAGCCACCAAAACACC	59.035	20	CAAGTGGGAGGTGGGTTTTG	58.96	20	135	123	257
scaf_0000926_9	p3	(CAC)5	15	151	165	TGCATAGCCACCAAAACACC	59.035	20	GGTAGAGCGGCTTGATTTGG	58.983	20	110	123	232	TGCATAGCCACCAAAACACC	59.035	20	GGGTAGAGCGGCTTGATTTG	58.983	20	111	123	233	TGCATAGCCACCAAAACACC	59.035	20	CAAGTGGGAGGTGGGTTTTG	58.96	20	135	123	257
scaf_0000927_11	p3	(ATA)5	15	151	165	TGATTTGATGGGTGTGAGTGA	57.214	21	TTGAAGAAGTGGTGCTGTGC	58.976	20	223	52	274	CAAAACAGGACCTTGGTACCA	58.061	21	GCCCTGTATCATATCACGTGC	58.931	21	101	203	303	TGATTTGATGGGTGTGAGTGA	57.214	21	GAAGAAGTGGTGCTGTGCAT	58.758	20	221	52	272
scaf_0000927_18	p3	(AAG)11	33	151	183	TTGCAATGGATCCAAGGTGT	57.693	20	CTAGGCCTCCACCACAAGAT	58.792	20	261	59	319	TTGCAATGGATCCAAGGTGT	57.693	20	ATCTAGGCCTCCACCACAAG	58.792	20	263	59	321	ATTGCAATGGATCCAAGGTGT	58.176	21	CTAGGCCTCCACCACAAGAT	58.792	20	262	58	319
scaf_0000928_15	p3	(AAG)7	21	151	171	TCGAGAAACGAGAGGCACTT	59.04	20	AGCTGACTGAGGAATGAGCA	58.726	20	136	111	246	CGAGAAACGAGAGGCACTTG	58.936	20	AGCTGACTGAGGAATGAGCA	58.726	20	135	112	246	TTAGAGAAACCTGGGGAGCG	59.097	20	AGCTGACTGAGGAATGAGCA	58.726	20	185	62	246
scaf_0000930_5	p4	(AAAT)5	20	151	170	GGGGTCTGTAGCAGTGTTGT	59.603	20	GTCGTTCACCCAATCGATCA	57.995	20	278	42	319	GTGGGGTCTGTAGCAGTGTT	59.603	20	GTCGTTCACCCAATCGATCA	57.995	20	280	40	319	TGGGGTCTGTAGCAGTGTTG	59.604	20	GTCGTTCACCCAATCGATCA	57.995	20	279	41	319
scaf_0000930_24	p4	(ATTT)5	20	151	170	AGACTCATAACTCGCCAATGAT	57.321	22	GGGACACAAATAGCCCATGC	59.253	20	150	105	254	AGACTCATAACTCGCCAATGAT	57.321	22	GGACACAAATAGCCCATGCA	58.527	20	149	105	253	GACTCATAACTCGCCAATGATTC	57.664	23	GGGACACAAATAGCCCATGC	59.253	20	149	106	254
scaf_0000930_27	p3	(AAT)5	15	151	165	AACACGGCGTAAGGAGATCA	59.107	20	GGGACATGTGGTTTTGCTCT	58.379	20	103	19	121	AACACGGCGTAAGGAGATCA	59.107	20	AGGGACATGTGGTTTTGCTC	58.379	20	104	19	122	CACGGCGTAAGGAGATCAGA	59.261	20	GGGACATGTGGTTTTGCTCT	58.379	20	101	21	121
scaf_0000931_9	p3	(TTG)5	15	151	165	GCGTTATGCCTCAGTCTGAA	57.99	20	TCAACGACAGAGTCAAGGCT	58.959	20	142	113	254	GCGTTATGCCTCAGTCTGAAG	59.07	21	TCAACGACAGAGTCAAGGCT	58.959	20	142	113	254	GCGTTATGCCTCAGTCTGAA	57.99	20	ACAGAGTCAAGGCTAACGGT	58.661	20	136	113	248
scaf_0000937_16	p3	(AAC)5	15	151	165	ACACTGAACCAGCAGCAAAG	58.973	20	CAGGACCCAACCCTTGTTTG	58.96	20	117	179	295	ACACTGAACCAGCAGCAAAG	58.973	20	GAATGCTTCCAGGACCCAAC	58.823	20	126	179	304	ACACTGAACCAGCAGCAAAG	58.973	20	CCAACCCTTGTTTGGCACAT	59.242	20	111	179	289
scaf_0000941_16	p3	(TGG)5	15	151	165	TGGTGGAAGCAACAATGGTG	58.961	20	CACCATCTTTACACCACCGC	59.198	20	135	159	293	TGGTGGAAGCAACAATGGTG	58.961	20	CGCCGCTACCCAATTTTCAT	59.262	20	118	159	276	AATTGTTGGTGGTGGTGGTG	58.881	20	CACCATCTTTACACCACCGC	59.198	20	150	144	293
scaf_0000942_3	p3	(TTG)10	30	151	180	TTGAGGCTCAGATCTGCAGA	58.435	20	AACACAAACAGATCTGCGCC	59.407	20	136	15	150	TTGAGGCTCAGATCTGCAGA	58.435	20	CACAAACAGATCTGCGCCAA	59.407	20	134	15	148	TTGAGGCTCAGATCTGCAGA	58.435	20	ACAAACAGATCTGCGCCAAT	58.462	20	133	15	147
scaf_0000942_9	p3	(ATA)5	15	151	165	AATTCCGTCAGATCCCGTCA	58.808	20	TCCCTTTGTGATTTCGCACA	58.026	20	112	0	111	TCCCGTCACTTTTGCACATC	58.765	20	TCCCTTTGTGATTTCGCACA	58.026	20	100	12	111	GATCCCGTCACTTTTGCACA	58.765	20	TCCCTTTGTGATTTCGCACA	58.026	20	102	10	111
scaf_0000942_22	p3	(AAG)5	15	151	165	TCGATAGAAGAGATGGGAAGCT	58.161	22	GTGCATTTGGTGGAAGCTCA	59.039	20	107	106	212	GTGTAGCTTTAATGGCTTTGTCG	58.597	23	GTGCATTTGGTGGAAGCTCA	59.039	20	127	86	212	TCGATAGAAGAGATGGGAAGCT	58.161	22	TTCGTGCATTTGGTGGAAGC	59.686	20	110	106	215
scaf_0000942_23	p3	(AAT)5	15	151	165	TGAGTGGCCTTTTTCTTGCC	58.96	20	GCTTGCTTACGTTGATTGCC	58.382	20	193	95	287	GAGTGAGCAACTTGAGTGGC	59.129	20	GCTTGCTTACGTTGATTGCC	58.382	20	205	83	287	CGAGTGAGCAACTTGAGTGG	58.857	20	GCTTGCTTACGTTGATTGCC	58.382	20	206	82	287
scaf_0000944_19	p4	(TATT)5	20	151	170	CGGTAATCTAATGCCGAACGT	58.533	21	CCAGCAAATGAGTGCCCTTT	59.029	20	180	83	262	AGTCCAAAATCACATTGCCGA	58.486	21	CCAGCAAATGAGTGCCCTTT	59.029	20	250	13	262	CGGTAATCTAATGCCGAACGT	58.533	21	CTACCAGCAAATGAGTGCCC	58.902	20	183	83	265
scaf_0000945_4	p3	(TTA)6	18	151	168	TAAACATGCGGTGTCTCCCA	59.312	20	TCAAATCGAAGCTGTGGCAC	59.126	20	200	64	263	CTAAACATGCGGTGTCTCCC	58.63	20	TCAAATCGAAGCTGTGGCAC	59.126	20	201	63	263	TAAACATGCGGTGTCTCCCA	59.312	20	CTGTGGCACCCGAATTTTCT	58.752	20	189	64	252
scaf_0000945_11	p3	(TAT)16	48	151	198	TCCTGAATGAGAGCTATAGGGG	58.216	22	CTAACCACAAGTCTTGTAGGAGT	57.53	23	100	202	301	CCTGAATGAGAGCTATAGGGGA	58.216	22	TCTAACCACAAGTCTTGTAGGAG	57.276	23	100	203	302	TCCTGAATGAGAGCTATAGGGG	58.216	22	TCTAACCACAAGTCTTGTAGGAG	57.276	23	101	202	302
scaf_0000947_6	p3	(CCA)5	15	151	165	CGCTATCTCTTTATTTGCACCAC	58.162	23	ATAGTCAATTGGTGGTGGCG	58.25	20	109	92	200	GCTATCTCTTTATTTGCACCACC	57.825	23	ATAGTCAATTGGTGGTGGCG	58.25	20	108	93	200	CGCTATCTCTTTATTTGCACCAC	58.162	23	AATAGTCAATTGGTGGTGGCG	58.908	21	110	92	201
scaf_0000947_11	p3	(CCA)5	15	151	165	TCACAACCGCCACTATCACT	59.026	20	TGAAAGTGGTGGTGGTGGAT	59.15	20	103	123	225	TCACAACCGCCACTATCACT	59.026	20	ATGAAAGTGGTGGTGGTGGA	59.15	20	104	123	226	TCACAACCGCCACTATCACT	59.026	20	GATGAAAGTGGTGGTGGTGG	58.752	20	105	123	227
scaf_0000947_23	p3	(CCA)6	18	151	168	TTGGGGCCCTCCTTTGTAAG	59.592	20	GTGCCAATCACAATGGTGGT	59.032	20	100	30	129	TTGGGGCCCTCCTTTGTAAG	59.592	20	TGGAGGCAACAATGGTACCT	58.928	20	123	30	152	GGGCCCTCCTTTGTAAGTGT	59.596	20	TGGAGGCAACAATGGTACCT	58.928	20	120	33	152
scaf_0000948_8	p3	(AAT)6	18	151	168	AAAACCCTGTTTGGTCGCAG	59.256	20	CCCCACATCTCCAAAACTGC	59.109	20	100	168	267	GAACTGGGGTGTTTTGGAGG	58.672	20	CCCACATCTCCAAAACTGCC	59.109	20	206	61	266	GAACTGGGGTGTTTTGGAGG	58.672	20	CCCCACATCTCCAAAACTGC	59.109	20	207	61	267
scaf_0000949_3	p3	(ATT)5	15	151	165	TCTTCCTAGCTCATGGGCAA	58.416	20	CCTACCATCTGGAAGCCCAA	59.081	20	280	0	279	TGCCTATCATTGAGCAGTGC	58.328	20	AGGCTAAAGGTCACGGACAA	58.947	20	204	102	305	TGCCTATCATTGAGCAGTGC	58.328	20	AAGGCTAAAGGTCACGGACA	58.947	20	205	102	306
scaf_0000949_9	p3	(TTC)9	27	6	32	AGGGAAGAATCTTCAAGGAGGA	58.192	22	ACACAGCAGTTCTCTCTCTCT	58.125	21	109	66	174	ACAGGGAGAAACGAATGAAACA	58.184	22	ACACAGCAGTTCTCTCTCTCT	58.125	21	138	37	174	CGAATGAAACAAGGAACAAGGG	58.099	22	ACACAGCAGTTCTCTCTCTCT	58.125	21	127	48	174
scaf_0000952_9	p3	(TTA)18	54	151	204	TGGGCCAAAATGAGTAGAGGA	58.725	21	ACAATCCTCATGCCCCATGA	59.071	20	118	117	234	GTGGGCCAAAATGAGTAGAGG	58.631	21	ACAATCCTCATGCCCCATGA	59.071	20	119	116	234	TGTGTTTGTAGTGTGGTTGGG	58.63	21	ACAATCCTCATGCCCCATGA	59.071	20	210	25	234
scaf_0000955_7	p3	(TTA)6	18	151	168	AGTCTCGTTTGGATTGGACTT	57.228	21	GCTTGGGAAGACAGGTTTGG	59.038	20	164	42	205	AAGTCTCGTTTGGATTGGACT	57.228	21	GCTTGGGAAGACAGGTTTGG	59.038	20	165	41	205	AGTCTCGTTTGGATTGGACTT	57.228	21	ATGTGCTTGCTTGGGAAGAC	58.749	20	172	42	213
scaf_0000959_26	p3	(CCT)9	27	151	177	TTTTAGGCCCCTTCCAGTCC	59.298	20	TAGAGTAGCGATTGGGAGCC	58.671	20	149	131	279	TCCTCCTCCTCCTTCCATCT	58.676	20	TAGAGTAGCGATTGGGAGCC	58.671	20	116	164	279	TTTTAGGCCCCTTCCAGTCC	59.298	20	CCGAATGCCCCGAATTTGTA	58.615	20	114	131	244
scaf_0000960_2	p3	(GAA)5	15	151	165	ACCACCCTCCTTTAATCCCG	59.083	20	TCATAGGCCTTGGTTGGGTT	58.919	20	127	13	139	ACCCTCCTTTAATCCCGACG	59.171	20	TCATAGGCCTTGGTTGGGTT	58.919	20	124	16	139	ACCACCCTCCTTTAATCCCG	59.083	20	CATAGGCCTTGGTTGGGTTG	58.815	20	126	13	138
scaf_0000962_28	p3	(TTG)5	15	315	329	CGGCGGTGAAGGTAGTAGAA	59.187	20	AGGGAAGTGGGGAACAACAA	59.069	20	103	1	103	CGGCGGTGAAGGTAGTAGAA	59.187	20	ATTGACAGGGAAGTGGGGAA	58.544	20	109	1	109	CGGCGGTGAAGGTAGTAGAA	59.187	20	AATTGACAGGGAAGTGGGGA	58.544	20	110	1	110
scaf_0000963_1	p4	(AAAT)5	20	151	170	CCCTGCTCACGAGTTGACTA	59.111	20	TGGTCATGCCCTTTTGAACG	59.042	20	114	118	231	CCCTGCTCACGAGTTGACTA	59.111	20	GCCCTTTTGAACGCAGACAT	59.402	20	107	118	224	CCCTGCTCACGAGTTGACTA	59.111	20	ATGCCCTTTTGAACGCAGAC	59.402	20	109	118	226
scaf_0000964_2	p3	(AAG)7	21	151	171	AGAAGGAGGTTGAGCTGGTC	59.02	20	TCCTCCACCATAGCTCTCCT	59.063	20	151	166	316	AGAAGGAGGTTGAGCTGGTC	59.02	20	TCCTCCTCCACCATAGCTCT	59.063	20	154	166	319	AGAAGGAGGTTGAGCTGGTC	59.02	20	GCCATAGCTCTCCAGGAACT	58.873	20	122	166	287
scaf_0000964_14	p3	(TTC)5	15	151	165	CACGTTTAGGCGTAACTCCA	57.931	20	GTCGGGGGTGGAGACTTAAA	59.021	20	259	18	276	ACACGTTTAGGCGTAACTCC	57.93	20	GTCGGGGGTGGAGACTTAAA	59.021	20	260	17	276	CACGTTTAGGCGTAACTCCAA	58.594	21	GTCGGGGGTGGAGACTTAAA	59.021	20	259	18	276
scaf_0000965_2	p3	(AAT)5	15	151	165	CCTTGCCCTTTTCGGTTTCA	58.963	20	AGAGCTGGACGTGGTGTTAA	58.955	20	218	11	228	CCTTGCCCTTTTCGGTTTCA	58.963	20	AGTCGGCGGTATTGGTATGT	58.883	20	183	11	193	CCTTGCCCTTTTCGGTTTCA	58.963	20	TACGTGTGGCCTCGTCAATA	58.824	20	270	11	280
scaf_0000966_19	p4	(GAGT)7	28	151	178	GCAGACCCAATCAGCCAAAT	58.811	20	CTTCGTCCCCTATCGGTACA	58.316	20	180	24	203	GCAGACCCAATCAGCCAAAT	58.811	20	ACTTCGTCCCCTATCGGTAC	58.315	20	181	24	204	GCAGACCCAATCAGCCAAAT	58.811	20	CTCATGGAAGATCTCCCCGA	58.29	20	260	24	283
scaf_0000967_2	p3	(TTA)6	18	151	168	GAAACGAAGGGTTGGCTCAG	59.125	20	AAATCAGGGTCGCTACAGCA	59.387	20	115	15	129	GAAACGAAGGGTTGGCTCAG	59.125	20	AAAATCAGGGTCGCTACAGC	58.261	20	116	15	130	AGAAACGAAGGGTTGGCTCA	59.528	20	AAATCAGGGTCGCTACAGCA	59.387	20	116	14	129
scaf_0000971_9	p3	(CTT)8	24	151	174	CTTTGGAGCCATCTCGCATC	59.057	20	GGAGGAGCTTTGGGGTATGT	59.08	20	112	34	145	TTCCGCAATGTCTTTGGAGC	59.119	20	GGAGGAGCTTTGGGGTATGT	59.08	20	123	23	145	CGCAATGTCTTTGGAGCCAT	59.187	20	GGAGGAGCTTTGGGGTATGT	59.08	20	120	26	145
scaf_0000972_2	p3	(TGG)5	15	151	165	TCCAGTACTACCCCCATGGA	58.98	20	AGACTAAACAAGGTGGCGGA	58.947	20	116	105	220	GGGGACAACACACTCCAGTA	58.947	20	AGACTAAACAAGGTGGCGGA	58.947	20	129	92	220	AAGTAGAGAAGGGCCAGCAG	59.092	20	TCCATGGGGGTAGTACTGGA	58.98	20	113	12	124
scaf_0000972_3	p3	(CAC)5	15	151	165	TCCGCCACCTTGTTTAGTCT	58.947	20	AAGGATCGGCAAGGTCAAGA	59.016	20	173	23	195	TCCGCCACCTTGTTTAGTCT	58.947	20	CAAGACCCTTGTGTTGGTGG	58.968	20	158	23	180	TCCGCCACCTTGTTTAGTCT	58.947	20	TTGTACCAGGTCAGGGGAAC	58.938	20	199	23	221
scaf_0000973_10	p3	(AAG)5	15	151	165	GCCAGGCATATTGACAACAGA	58.632	21	CAGTTTGGTTCAATTTTCACCCC	58.874	23	133	60	192	AGCCAGGCATATTGACAACAG	58.628	21	CAGTTTGGTTCAATTTTCACCCC	58.874	23	134	59	192	AGCCAGGCATATTGACAACA	57.487	20	CAGTTTGGTTCAATTTTCACCCC	58.874	23	134	59	192
scaf_0000973_15	p3	(TGC)5	15	151	165	TCTGGAGGAGGAGGTTAGCT	58.988	20	TTCAGCCTGCCCTTTATGGA	59.001	20	108	175	282	CTGCTTGAGTGCTTGGTTGT	58.973	20	TTCAGCCTGCCCTTTATGGA	59.001	20	153	130	282	CTGCTTGAGTGCTTGGTTGT	58.973	20	TGGAGCAAGTCAGGGAACAT	58.933	20	137	130	266
scaf_0000975_8	p4	(AAAT)5	20	151	170	AGGGGGCTTCTGAATCTGAA	58.326	20	CCTTATGAAGCTATGCACTAGGT	57.779	23	100	0	99	AGGGGGCTTCTGAATCTGAA	58.326	20	TCCTTATGAAGCTATGCACTAGG	57.525	23	101	0	100	AGGGGGCTTCTGAATCTGAAA	59.004	21	CCTTATGAAGCTATGCACTAGGT	57.779	23	100	0	99
scaf_0000975_12	p3	(AGA)11	33	151	183	GCAGTCAGCAAGAGGGAAAT	58.168	20	TACTCTCCCAACCTCGAACG	58.829	20	111	103	213	TCAAAGCATCGTCCGAAAACT	58.51	21	TACTCTCCCAACCTCGAACG	58.829	20	152	62	213	TCAAAGCATCGTCCGAAAACT	58.51	21	ACGGCACAGGTATGTCTTCT	58.733	20	135	62	196
scaf_0000976_11	p3	(CTT)5	15	151	165	TTGCTCAAACACGTCCAGAC	58.704	20	AGACCCAGGTAGGTTGCTTC	59.015	20	171	113	283	CCCCGTCTGCTTCTTCTTCT	59.389	20	AGACCCAGGTAGGTTGCTTC	59.015	20	143	141	283	TTGCTCAAACACGTCCAGAC	58.704	20	ACCCAGGTAGGTTGCTTCAA	58.854	20	169	113	281
scaf_0000977_6	p3	(TCT)6	18	293	310	CTGCTATCGTGGCAATCGTT	58.71	20	TTTGGCATGTGTTTGGAGGG	58.953	20	137	90	226	CTGCTATCGTGGCAATCGTT	58.71	20	GGTGTCTGTTTCGAAGCGTT	59.065	20	156	90	245	CTGCTATCGTGGCAATCGTT	58.71	20	GCATGTGTTTGGAGGGAGTG	59.116	20	133	90	222
scaf_0000977_7	p3	(TCT)10	30	151	180	ATCCTTGTACCAGACGACGC	59.827	20	AGGATCGATCTGGGAATTGCT	58.947	21	105	35	139	CATCCTTGTACCAGACGACG	58.091	20	AGGATCGATCTGGGAATTGCT	58.947	21	106	34	139	ACCATCCTTGTACCAGACGA	58.067	20	AGGATCGATCTGGGAATTGCT	58.947	21	108	32	139
scaf_0000977_11	p3	(CCA)8	24	287	310	ACTCCCTTTGTATCGGTGGA	58.053	20	GGGCTAGCATGGTGAAGGTA	59.163	20	234	53	286	ACTCCCTTTGTATCGGTGGA	58.053	20	GGTATTGGTGGTGGTTGTGG	58.747	20	218	53	270	ACTCCCTTTGTATCGGTGGA	58.053	20	GTTGTGGTGGTGGTAGTGTG	58.695	20	205	53	257
scaf_0000977_12	p3	(CCA)8	24	151	174	CCACAACCACCACCAATACC	58.747	20	TAGTGGAAGTGAGGGTGGTG	58.652	20	109	115	223	CACACTACCACCACCACAAC	58.695	20	TAGTGGAAGTGAGGGTGGTG	58.652	20	122	102	223	ACCACCACCACCACCAATAT	58.919	20	TTGGCTAGGACCCTGAAACT	58.258	20	105	158	262
scaf_0000977_17	p3	(ATT)7	21	151	171	TATGGGCTTCGGAGTGATGG	59.241	20	TCCAAGAGGACCTTCAACCC	58.935	20	278	7	284	TATGGGCTTCGGAGTGATGG	59.241	20	CAAGATTGCCACCAATGCCT	59.1	20	104	7	110	TCGGAGTGATGGTTGCTTCA	59.315	20	TCCAAGAGGACCTTCAACCC	58.935	20	270	15	284
scaf_0000983_6	p4	(TTTA)5	20	268	287	TTGGGGTTATAGAGTGGGGA	57.026	20	ATCCAAATCCCCTCCCCAAG	59.063	20	107	2	108	TGGGGTTATAGAGTGGGGATTG	58.947	22	ATCCAAATCCCCTCCCCAAG	59.063	20	106	3	108	TTGGGGTTATAGAGTGGGGA	57.026	20	AGCTCATCCAAATCCCCTCC	59.151	20	112	2	113
scaf_0000985_15	p3	(TTA)5	15	151	165	GATGACTCAAATTGGTGACTCAC	57.711	23	CAGCAATTAAGGAGTAGATTGGC	57.57	23	102	11	112	112	112	112	112	112	112	112	112	112	112	112	112	112	112	112	112	112	112
scaf_0000985_16	p3	(TCA)8	24	151	174	CCAGGGCTGGCCTTAGTATT	59.153	20	TGTGGTTTTGCATTTTCCCAC	58.089	21	112	128	239	CCAGGGCTGGCCTTAGTATT	59.153	20	GTGTGGTTTTGCATTTTCCCA	58.089	21	113	128	240	CCAGGGCTGGCCTTAGTATT	59.153	20	TGTGTGGTTTTGCATTTTCCC	58.089	21	114	128	241
scaf_0000985_17	p3	(TCA)8	24	15	38	GGGAAAATGCAAAACCACACA	58.089	21	ACCCGAGTGAGACACTTCTC	58.751	20	194	85	278	TGGGAAAATGCAAAACCACAC	58.089	21	ACCCGAGTGAGACACTTCTC	58.751	20	195	84	278	GTGGGAAAATGCAAAACCACA	58.089	21	ACCCGAGTGAGACACTTCTC	58.751	20	196	83	278
scaf_0000988_33	p3	(AAT)5	15	151	165	TACAAGTGAATGAGCGGGGT	59.019	20	TCTCTACAGCATTCCGTCCA	58.153	20	111	29	139	TACAAGTGAATGAGCGGGGT	59.019	20	AGGTGAGATTTATGGCCCACA	59.078	21	186	29	214	TACAAGTGAATGAGCGGGGT	59.019	20	ACTCTCTACAGCATTCCGTCC	59.248	21	113	29	141
scaf_0000989_18	p3	(CTA)5	15	292	306	TGTCCATGGATTTTTGCACTCT	58.501	22	TTCCCAATCTTGATCCCGCT	59.081	20	113	25	137	TGTCCATGGATTTTTGCACTCT	58.501	22	TCCCGCTAAATCTCCTCACC	58.879	20	100	25	124	TGTCCATGGATTTTTGCACTC	57.06	21	TTCCCAATCTTGATCCCGCT	59.081	20	113	25	137
scaf_0000989_19	p3	(CTA)5	15	151	165	ACGACGCCAAATCTTTGAGT	58.121	20	AAGCTCGTGGAAAACCTGTG	58.691	20	103	194	296	ACGCCAAATCTTTGAGTACCG	58.926	21	AAGCTCGTGGAAAACCTGTG	58.691	20	100	197	296	ACGACGCCAAATCTTTGAGT	58.121	20	CTCGTGGAAAACCTGTGCAC	59.692	20	100	194	293
scaf_0000993_5	p3	(TTA)5	15	19	33	AGAGCGAGAGAGAGAGAGGG	59.53	20	GGAAGTGGGTTTTGCACTCA	58.601	20	117	295	411	AGAGCGAGAGAGAGAGAGGG	59.53	20	AGGAAGTGGGTTTTGCACTC	58.308	20	118	295	412	GAGAGCGAGAGAGAGAGAGG	58.129	20	GGAAGTGGGTTTTGCACTCA	58.601	20	118	294	411
scaf_0000993_7	p4	(TTTA)5	20	151	170	TGATAGTTTGGCATTGTGGGT	57.832	21	GCCAACCAAACCATCCATCA	58.735	20	125	192	316	TGATAGTTTGGCATTGTGGGT	57.832	21	TGCCAACCAAACCATCCATC	58.735	20	126	192	317	TGATAGTTTGGCATTGTGGGTT	58.495	22	GCCAACCAAACCATCCATCA	58.735	20	125	192	316
scaf_0000994_11	p3	(ATG)11	33	151	183	TGGTGGAGTGTTTATCCTTGGA	59.017	22	AGCTATCCTCCATCGATAACCC	58.899	22	267	31	297	TGGTGGAGTGTTTATCCTTGGA	59.017	22	TCCAACTCCACCATCATCATCA	59.154	22	163	31	193	TGGTGGAGTGTTTATCCTTGGA	59.017	22	GCTATCCTCCATCGATAACCCA	59.168	22	266	31	296
scaf_0000995_7	p4	(TTTA)5	20	151	170	GCCATTTGAGCATTGAACTTCT	57.816	22	CCAACGCACACTAACAGCAT	59.126	20	188	31	218	AGCCATTTGAGCATTGAACTTC	57.816	22	CCAACGCACACTAACAGCAT	59.126	20	189	30	218	GCCATTTGAGCATTGAACTTCT	57.816	22	CTACCACATCACCAACGCAC	59.204	20	199	31	229
scaf_0000995_14	p3	(TTC)5	15	151	165	TCCTCACACCTCCACCTTTT	58.482	20	AGGAAGATGCGGAACCAAGA	59.016	20	186	70	255	TCCTCACACCTCCACCTTTT	58.482	20	ATGAGGAAGATGCGGAACCA	59.088	20	189	70	258	CCTCACACCTCCACCTTTTG	58.391	20	AGGAAGATGCGGAACCAAGA	59.016	20	185	71	255
scaf_0000998_7	p3	(TCT)5	15	151	165	GCCAACTGCGTCTTCTTCTT	58.77	20	TACTCCAAAACAAACGGGCC	58.679	20	139	140	278	ACTCGCTCAGGCTAGACATG	59.256	20	TACTCCAAAACAAACGGGCC	58.679	20	104	175	278	GTACTCGCTCAGGCTAGACA	58.619	20	TACTCCAAAACAAACGGGCC	58.679	20	106	173	278
scaf_0000999_11	p4	(ATTT)7	28	151	178	CTTGGACTTGGACGGGTTTG	59.048	20	TTTTGAAGTCCGGCTTGTGG	58.971	20	167	125	291	GGACTTGGACGGGTTTGAAC	59.051	20	TTTTGAAGTCCGGCTTGTGG	58.971	20	164	128	291	TTGAGCCGACTAGTGGACTG	59.111	20	TTTTGAAGTCCGGCTTGTGG	58.971	20	232	60	291
scaf_0001002_9	p3	(ATT)6	18	151	168	CTCACTCACTCACTCCCTCC	58.818	20	TCAGAACTCTCGACCTTGAGA	57.858	21	252	3	254	TCACTCACTCACTCCCTCCT	59.219	20	TCAGAACTCTCGACCTTGAGA	57.858	21	251	4	254	CTCACTCACTCACTCCCTCC	58.818	20	TCGTATCAGAACTCTCGACCT	57.737	21	257	3	259
scaf_0001003_2	p3	(AAG)9	27	278	304	ATCTCCTGCTCGGACAACAA	59.023	20	TTATGTTGCGTTTCCTGGCC	59.115	20	154	90	243	AATCTCCTGCTCGGACAACA	59.023	20	TTATGTTGCGTTTCCTGGCC	59.115	20	155	89	243	ACAATCTCCTGCTCGGACAA	59.023	20	TTATGTTGCGTTTCCTGGCC	59.115	20	157	87	243
scaf_0001003_3	p3	(AAG)9	27	151	177	GGCCAGGAAACGCAACATAA	59.115	20	AGGACTTCAGGACTTCTGTGT	58.316	21	183	97	279	GGCCAGGAAACGCAACATAA	59.115	20	AGGACTTCAGGACTTCTGTGTT	58.958	22	183	97	279	GGCCAGGAAACGCAACATAA	59.115	20	TCGTAGGACTTCAGGACTTCTG	58.917	22	187	97	283
scaf_0001003_11	p3	(AGA)6	18	151	168	GGTGGAAGCATCTTTTCCCC	58.814	20	GAGGGGTGCTTACTCTCTCT	57.847	20	139	46	184	GGTGGAAGCATCTTTTCCCC	58.814	20	AGAGGGGTGCTTACTCTCTC	57.847	20	140	46	185	GGTGGAAGCATCTTTTCCCC	58.814	20	AGAGGGGTGCTTACTCTCTCT	59.356	21	140	46	185
scaf_0001003_12	p4	(TGAT)5	20	151	170	GAAAGAGCCCCCAAAGTGAG	58.461	20	AGGAAGCCCTAAGACACTGA	57.673	20	243	0	242	GAAAGAGCCCCCAAAGTGAG	58.461	20	AAGGAAGCCCTAAGACACTGA	58.379	21	244	0	243	AAAGAGCCCCCAAAGTGAGG	59.887	20	AGGAAGCCCTAAGACACTGA	57.673	20	242	1	242
scaf_0001008_1	p3	(TGG)5	15	151	165	AGTGGAGAAAGAGCCCTCAC	59.02	20	ATATCCACTGCACACCACCA	59.009	20	139	40	178	CAGTGGAGAAAGAGCCCTCA	59.02	20	ATATCCACTGCACACCACCA	59.009	20	140	39	178	AGTGGAGAAAGAGCCCTCAC	59.02	20	ACCACCATCGTCTTCACCAT	59.016	20	117	40	156
scaf_0001008_5	p3	(AGA)5	15	151	165	ACATGAGACACTAACGGGGG	59.097	20	CCCCTCGCTACTTGGAATGA	59.169	20	164	103	266	GGGAAGGGTTGTAGAGGAGG	58.795	20	CCCCTCGCTACTTGGAATGA	59.169	20	146	121	266	GGGGAAGGGTTGTAGAGGAG	58.795	20	CCCCTCGCTACTTGGAATGA	59.169	20	147	120	266
scaf_0001010_1	p3	(ACC)6	18	151	168	TCTGTGTTGCGGTTTGGAAG	58.979	20	ATGATGATGGTGGTGGTGGT	58.998	20	175	1	175	CCGGTTCGATGGAAATCGTC	59.072	20	ATGATGATGGTGGTGGTGGT	58.998	20	114	62	175	TCTGTGTTGCGGTTTGGAAG	58.979	20	ACGATGATGATGGTGGTGGT	59.088	20	178	1	178
scaf_0001010_7	p3	(AGA)13	39	151	189	GGATGGAAGAAGACCGGAGA	58.514	20	TGTCTTCTCCACTTCTCGTCT	58.135	21	141	107	247	GAGGATGGAAGAAGACCGGA	58.514	20	TGTCTTCTCCACTTCTCGTCT	58.135	21	143	105	247	AGGATGGAAGAAGACCGGAG	58.509	20	TGTCTTCTCCACTTCTCGTCT	58.135	21	142	106	247
scaf_0001010_7	p3	(AGA)6	18	300	317	GGATGGAAGAAGACCGGAGA	58.514	20	TGTCTTCTCCACTTCTCGTCT	58.135	21	141	107	247	GAGGATGGAAGAAGACCGGA	58.514	20	TGTCTTCTCCACTTCTCGTCT	58.135	21	143	105	247	AGGATGGAAGAAGACCGGAG	58.509	20	TGTCTTCTCCACTTCTCGTCT	58.135	21	142	106	247
scaf_0001010_8	p3	(AGA)13	39	2	40	AGACGAGAAGTGGAGAAGACA	58.135	21	TCCAATCCAGTAGCCCCAAA	58.622	20	130	78	207	TTTGGGGCTACTGGATTGGA	58.622	20	ACATTGGGCATTCAGTCTCA	57.115	20	114	188	301	AGACGAGAAGTGGAGAAGACA	58.135	21	TGCTGCTACTTGCTTTCGTT	58.407	20	151	78	228
scaf_0001010_8	p3	(AGA)6	18	151	168	AGACGAGAAGTGGAGAAGACA	58.135	21	TCCAATCCAGTAGCCCCAAA	58.622	20	130	78	207	TTTGGGGCTACTGGATTGGA	58.622	20	ACATTGGGCATTCAGTCTCA	57.115	20	114	188	301	AGACGAGAAGTGGAGAAGACA	58.135	21	TGCTGCTACTTGCTTTCGTT	58.407	20	151	78	228
scaf_0001010_17	p3	(GTG)6	18	151	168	GCGGTGCTCACAGTTATGTT	58.843	20	CATCACCGTCACCACTACCT	59.104	20	105	185	289	GTGATGGTGGTGGTAGTGGT	59.309	20	CATCACCGTCACCACTACCT	59.104	20	155	135	289	TGATGGTGGTGGTAGTGGTG	59.31	20	CATCACCGTCACCACTACCT	59.104	20	154	136	289
scaf_0001010_22	p3	(CAC)7	21	151	171	CTAACGCTACAATGACCGCC	59.072	20	TGGTTGTGGCAGTGATGTTG	58.969	20	115	117	231	CTAACGCTACAATGACCGCC	59.072	20	GGTTGTGGCAGTGATGTTGT	58.968	20	114	117	230	CTAACGCTACAATGACCGCC	59.072	20	GTGGTTGTGGCAGTGATGTT	58.968	20	116	117	232
scaf_0001010_23	p3	(CAC)5	15	151	165	CCACCGCCACCCTATTATCT	58.943	20	GCAGAGTCAGTAGTGGTGGT	59.03	20	115	62	176	CCACCGCCACCCTATTATCT	58.943	20	CTCACAATGGTGGTGGTGTG	59.046	20	182	62	243	CCACCGCCACCCTATTATCT	58.943	20	AGTCAGTAGTGGTGGTGGTG	58.951	20	111	62	172
scaf_0001010_23	p3	(ACC)5	15	301	315	CCACCGCCACCCTATTATCT	58.943	20	GCAGAGTCAGTAGTGGTGGT	59.03	20	115	62	176	CCACCGCCACCCTATTATCT	58.943	20	CTCACAATGGTGGTGGTGTG	59.046	20	182	62	243	CCACCGCCACCCTATTATCT	58.943	20	AGTCAGTAGTGGTGGTGGTG	58.951	20	111	62	172
scaf_0001010_24	p3	(CAC)5	15	1	15	ACCACCACTACTGACTCTGC	59.03	20	TGTGGCGGCAGTAGTAGTAG	58.899	20	117	7	123	CACCACCACCACTACTGACT	58.951	20	TGTGGCGGCAGTAGTAGTAG	58.899	20	121	3	123	CACACCACCACCATTGTGAG	59.046	20	CCGAGCAGGTTCTCTCAAGA	59.109	20	266	74	339
scaf_0001016_3	p3	(CAC)6	18	151	168	CCTCCTCCGTCTTCCTCATC	58.963	20	AAGCAACTGGTTGTCGTTCC	58.978	20	191	24	214	CCTCCTCCGTCTTCCTCATC	58.963	20	GGTTGTCGTTCCAGCAACAT	59.048	20	183	24	206	ATCTTCCTCCTCCTCCGTCT	59.069	20	AAGCAACTGGTTGTCGTTCC	58.978	20	199	16	214
scaf_0001016_6	p3	(ATT)10	30	151	180	TCTTTGCTCCGTCACTGAGT	58.959	20	TGTGATGTGAACCTCGCATG	58.558	20	106	101	206	TCTTTGCTCCGTCACTGAGT	58.959	20	GTGATGTGAACCTCGCATGA	58.274	20	105	101	205	TCTTTGCTCCGTCACTGAGT	58.959	20	TTTGTGATGTGAACCTCGCA	58.04	20	108	101	208
scaf_0001016_13	p4	(AAAC)5	20	151	170	ACACAGATTTCAAGGCTGCA	58.015	20	TCCTCGGATTGAACCCACTC	59.097	20	147	71	217	TGCACACAGATTTCAAGGCT	58.015	20	TCCTCGGATTGAACCCACTC	59.097	20	150	68	217	ACACAGATTTCAAGGCTGCA	58.015	20	TTATCCAAGCCCGTACCGAA	58.807	20	217	71	287
scaf_0001018_6	p3	(GGT)7	21	151	171	GCTGGGTAGAGGTGTTCAGT	59.023	20	ATCACCGTTGTTGCAGTCAC	59.056	20	151	40	190	GCTGGGTAGAGGTGTTCAGT	59.023	20	CATCACCGTTGTTGCAGTCA	59.056	20	152	40	191	TATTGGTAGCGGCTGGGTAG	58.955	20	ATCACCGTTGTTGCAGTCAC	59.056	20	162	29	190
scaf_0001022_6	p3	(ATT)5	15	151	165	CCCATTTTTCTGTCACTCCCC	58.829	21	TTGGAGTACCCGTGCTTCAT	59.019	20	271	42	312	CCCATTTTTCTGTCACTCCCC	58.829	21	TTTGGAGTACCCGTGCTTCA	59.24	20	272	42	313	ACCCGTTTCCCATTTTTCTGT	58.327	21	TTGGAGTACCCGTGCTTCAT	59.019	20	279	34	312
scaf_0001024_2	p3	(TTC)5	15	151	165	GGCTTATGTTAGATGGGCTGC	59.117	21	GCATTGCTTCATCATATCCCGA	58.923	22	107	29	135	GGCTTATGTTAGATGGGCTGC	59.117	21	TGCTTCATCATATCCCGATCCA	59.094	22	103	29	131	TGAGGCTCTACAAACTGCGA	59.034	20	CGTACAACGTACATACCCAATCA	58.577	23	163	53	215
scaf_0001025_2	p3	(GTG)6	18	1	18	GTGGTGGTGGTGGTGGTG	60.518	18	ACCCAACACTAGCCACTACC	59.018	20	147	0	146	GTGGGTGGCTGGTGAGTG	60.282	18	ATCACCCAACACTAGCCACT	58.638	20	101	49	149	GTGGTGGTGGTGGTGGTG	60.518	18	GCCACTATTTTCCACCACCG	59.191	20	126	0	125
scaf_0001025_27	p3	(CCT)11	33	151	183	ATCGCTACCTCCGTACCATG	59.04	20	GGTGCGTTGGTGAGTACATG	59.204	20	100	48	147	ATCGCTACCTCCGTACCATG	59.04	20	TCAATCGACGAGCAGAGGAG	59.265	20	150	48	197	ATCGCTACCTCCGTACCATG	59.04	20	CTCAATCGACGAGCAGAGGA	59.265	20	151	48	198
scaf_0001028_7	p3	(AAT)5	15	151	165	CACGCTCAGCCAATATGCTT	58.98	20	ATGCAATGTGTGTGTGGCAT	59.029	20	158	27	184	CACGCTCAGCCAATATGCTT	58.98	20	AGGATTGACCGGAGCATTGA	59.088	20	238	27	264	ATGCCACACACACATTGCAT	59.029	20	AGGATTGACCGGAGCATTGA	59.088	20	100	165	264
scaf_0001028_9	p3	(AAG)5	15	151	165	AGCTGCATGATGACCCTACA	58.793	20	AGAACCCTGCCATCACTCAA	58.933	20	180	55	234	AGCTGCATGATGACCCTACA	58.793	20	AAGAACCCTGCCATCACTCA	58.933	20	181	55	235	CTTGTCACACGGAGTACAGC	58.581	20	AGAACCCTGCCATCACTCAA	58.933	20	233	2	234
scaf_0001028_12	p4	(ATTT)7	28	151	178	TTGTGGTGATGATGCTTAGGT	57.281	21	TCTCTGTGTTTTGGCCAAATCA	58.705	22	127	75	201	TTGTGGTGATGATGCTTAGGT	57.281	21	CTCTGTGTTTTGGCCAAATCA	57.268	21	126	75	200	ATTGTGGTGATGATGCTTAGGT	57.759	22	TCTCTGTGTTTTGGCCAAATCA	58.705	22	128	74	201
scaf_0001029_12	p3	(GTG)6	18	151	168	GTGGTAATGGTTGCGGTTGT	59.044	20	CTACTATCGCCGTTCCCACT	58.97	20	109	129	237	GTGGTAATGGTTGCGGTTGT	59.044	20	GTTGGGGAGAGTTAGGGACC	59.09	20	184	129	312	CGTGGTGGTGGTAATGGTTG	59.122	20	CTACTATCGCCGTTCCCACT	58.97	20	116	122	237
scaf_0001029_14	p3	(GTG)5	15	151	165	TGCAAATCAGGTAGGGTCGA	58.728	20	ACCGCTATGACCATCGCTAA	58.963	20	193	36	228	TGCAAATCAGGTAGGGTCGA	58.728	20	CCTATTGCCACCACAACCAC	59.112	20	160	36	195	TGCAAATCAGGTAGGGTCGA	58.728	20	CACCCTATTGCCACCACAAC	59.112	20	163	36	198
scaf_0001030_4	p3	(ATT)5	15	151	165	GGAGGTGAGGAAGAGGCTTT	59.012	20	TCCTCCACTGGGAATGCTTT	58.924	20	232	0	231	GGAGGTGAGGAAGAGGCTTT	59.012	20	TTCCTCCACTGGGAATGCTT	58.924	20	233	0	232	GGAGGTGAGGAAGAGGCTTT	59.012	20	CCTCCACTGGGAATGCTTTG	58.82	20	231	0	230
scaf_0001030_5	p3	(ATT)5	15	31	45	AAAGCATTCCCAGTGGAGGA	58.924	20	GGACAAAATGACACCCACCC	59.034	20	105	92	196	CAAAGCATTCCCAGTGGAGG	58.82	20	GGACAAAATGACACCCACCC	59.034	20	106	91	196	AAAGCATTCCCAGTGGAGGA	58.924	20	GCCAGCCTAAGTGGAAACAG	58.831	20	184	92	275
scaf_0001032_12	p3	(ATA)7	21	151	171	GCCAAGCCAAATACCCGTAC	59.263	20	CATCGTGATCGGTTGTGGTG	59.279	20	125	25	149	AGCCAAGCCAAATACCCGTA	59.378	20	CATCGTGATCGGTTGTGGTG	59.279	20	126	24	149	GCCAAGCCAAATACCCGTAC	59.263	20	TCATCGTGATCGGTTGTGGT	59.394	20	126	25	150
scaf_0001032_18	p4	(AATA)5	20	151	170	AGCCATCATTGCAGCTTGTT	58.737	20	CATGCTGATCTACTTAACGACAG	57.12	23	141	63	203	AAGCCATCATTGCAGCTTGT	58.737	20	CATGCTGATCTACTTAACGACAG	57.12	23	142	62	203	GCCATCATTGCAGCTTGTTT	57.911	20	CATGCTGATCTACTTAACGACAG	57.12	23	140	64	203
scaf_0001033_3	p3	(GAA)13	39	151	189	TCTACCTCTCTCACAGGCCT	58.996	20	CCCCAATTCTTCAACGCCTT	58.743	20	120	113	232	GCAGAGAAAGTTTGCAGGCT	59.043	20	CCCCAATTCTTCAACGCCTT	58.743	20	145	88	232	GCAGGCTTTTGCTCTACCTC	58.909	20	CCCCAATTCTTCAACGCCTT	58.743	20	132	101	232
scaf_0001033_4	p3	(AAG)11	33	1	33	CAACGCTCGAAGAAGCTGAA	58.86	20	CATACACACGTACACGCACA	58.59	20	118	123	240	CAACGCTCGAAGAAGCTGAA	58.86	20	CACATACACACGTACACGCA	58.59	20	120	123	242	CAACGCTCGAAGAAGCTGAA	58.86	20	ACATACACACGTACACGCAC	58.589	20	119	123	241
scaf_0001035_13	p3	(GTT)5	15	151	165	GGGGCTTACCTTTGAAGACG	58.55	20	CACAGCGGGGCTCATTTTTA	58.827	20	232	8	239	GGGGCTTACCTTTGAAGACG	58.55	20	AGAGGACATGACAGGGACAC	58.729	20	269	8	276	GCGACAGGTACCCACAATCT	59.751	20	CACAGCGGGGCTCATTTTTA	58.827	20	159	81	239
scaf_0001035_34	p3	(AAT)6	18	151	168	TGGTATTGGGTGATGCTAGCT	58.873	21	TTTTCATAGTGTCCCTGCAGT	57.212	21	131	80	210	TGGTATTGGGTGATGCTAGCT	58.873	21	TTTTTCATAGTGTCCCTGCAGT	57.901	22	132	80	211	TGGTATTGGGTGATGCTAGC	57.362	20	TTTTCATAGTGTCCCTGCAGT	57.212	21	131	80	210
scaf_0001035_40	p3	(TTA)7	21	151	171	TCCCTCTCTTTCCATTTTCGTT	57.633	22	GCTATGGTCTTGGGTGATGC	58.687	20	208	53	260	TCCCTCTCTTTCCATTTTCGTT	57.633	22	GGTCTTGGGTGATGCTAGCT	59.456	20	203	53	255	ATCCCTCTCTTTCCATTTTCGT	57.424	22	GCTATGGTCTTGGGTGATGC	58.687	20	209	52	260
scaf_0001037_15	p4	(TTTA)5	20	151	170	CCCATTTTCCCAAGCGATCC	59.253	20	CACGAGTTGAAAGTGGTTAACA	57.132	22	100	200	299	CCCATTTTCCCAAGCGATCC	59.253	20	ACACGAGTTGAAAGTGGTTAAC	57.13	22	101	200	300	ACCCATTTTCCCAAGCGATC	58.526	20	CACGAGTTGAAAGTGGTTAACA	57.132	22	101	199	299
scaf_0001037_21	p3	(TGC)7	21	151	171	GTTGTTGCTGTCCCTATGCC	59.189	20	AGCTAAAAACCTGCCGATGC	59.189	20	103	32	134	CTGTCCCTATGCCCTGGAAT	58.856	20	CGACTCCTGTTACAATCGGC	58.722	20	192	39	230	CTGTCACCGTTGTTGTTGCT	59.267	20	AGCTAAAAACCTGCCGATGC	59.189	20	114	21	134
scaf_0001038_4	p4	(TTTA)5	20	151	170	AGACCACTACACCATCATGCA	59.091	21	TTGCCATGTTGGAGTGAACG	59.049	20	185	47	231	CGTTCACTCCAACATGGCAA	59.049	20	GCCTTTCGCACCACCAAAAA	60.179	20	101	212	312	AGACCACTACACCATCATGCA	59.091	21	CGACACACAATCGACAAGCT	58.86	20	167	47	213
scaf_0001038_7	p3	(TCT)10	30	151	180	ACCCCCTCACCCATTGATTT	58.907	20	CGGAGCCGAAAACGATATCC	58.862	20	102	28	129	ACCCCCTCACCCATTGATTT	58.907	20	GCAATGGTTGAAGTTTGGCG	58.861	20	120	28	147	ACCCCCTCACCCATTGATTT	58.907	20	ATGGTTGAAGTTTGGCGGAG	58.752	20	117	28	144
scaf_0001039_10	p3	(TTA)5	15	151	165	CATTGGGGACAGTTTTGGGG	59.024	20	TGGACTAACCGCAACACAAG	58.411	20	130	92	221	CATTGGGGACAGTTTTGGGG	59.024	20	GGACTAACCGCAACACAAGT	58.41	20	129	92	220	CATTGGGGACAGTTTTGGGG	59.024	20	TTGGACTAACCGCAACACAA	57.96	20	131	92	222
scaf_0001040_3	p3	(GTG)5	15	151	165	TGGTGGTGGAACAAAGGTGA	59.374	20	ATGTCACTACACCACCACCA	58.57	20	106	68	173	TGGTGGTGGAACAAAGGTGA	59.374	20	TGTCACTACACCACCACCAC	59.533	20	105	68	172	TTGGTGGTGGAACAAAGGTG	58.52	20	ATGTCACTACACCACCACCA	58.57	20	107	67	173
scaf_0001040_9	p4	(AAAC)6	24	298	321	CCCTTACTTCCGTCTTCTGC	57.988	20	AGCACAGGAAAGTCGGAAGA	58.951	20	139	9	147	CCCTTACTTCCGTCTTCTGC	57.988	20	CGCTCTCTCTCTCACACACA	59.122	20	177	9	185	CCCTTACTTCCGTCTTCTGC	57.988	20	ACACACACACACACACACAC	59.128	20	162	9	170
scaf_0001040_10	p4	(AAAC)6	24	151	174	TGTGTGTGAGAGAGAGAGCG	59.122	20	CTCAAGTCTGTGCACATGGC	59.48	20	254	19	272	GTGTGTGTGTGTGTGTGTGT	59.128	20	CTCAAGTCTGTGCACATGGC	59.48	20	267	6	272	GTGTGTGTGTGTGTGTGTGT	59.128	20	CTCAAGTCTGTGCACATGGC	59.48	20	269	4	272
scaf_0001044_4	p3	(TCC)6	18	151	168	CCTCCTCCTCCTCCCAAAAG	59.085	20	AGTGACAATGTGGAGAGGGG	59.013	20	115	154	268	CTCATCCTCCTCCTCCTCCT	59.14	20	AGTGACAATGTGGAGAGGGG	59.013	20	123	146	268	TCATCCTCCTCCTCCTCCTC	59.143	20	AGTGACAATGTGGAGAGGGG	59.013	20	122	147	268
scaf_0001044_8	p3	(AGC)8	24	151	174	CATCATCAGAAGCAGCAGCA	58.62	20	ACATTGTGGGGATGGATGGT	58.99	20	149	140	288	CATCATCAGAAGCAGCAGCA	58.62	20	GTCCAGCTTGACATTGTGGG	59.116	20	159	140	298	CATCATCAGAAGCAGCAGCA	58.62	20	TTGCTTCTTGGGTTTGGGTG	58.881	20	106	140	245
scaf_0001045_9	p4	(AAAT)5	20	151	170	ACAGCGACAAACTCTCCGTA	59.043	20	CAGTACCCTCGACTCTCTGC	59.264	20	208	69	276	ACAGCGACAAACTCTCCGTA	59.043	20	TCCAGTACCCTCGACTCTCT	58.713	20	210	69	278	TCGTCATTGCCCATCTTCCT	59.088	20	CAGTACCCTCGACTCTCTGC	59.264	20	241	36	276
scaf_0001045_19	p3	(CAT)6	18	151	168	CTGGGTCAACCTCGAACTCT	59.03	20	TGTGTATTGAGGCACACCCA	59.232	20	216	39	254	GGGTCAACCTCGAACTCTGA	59.033	20	TGTGTATTGAGGCACACCCA	59.232	20	214	41	254	TCTGGGTCAACCTCGAACTC	59.033	20	TGTGTATTGAGGCACACCCA	59.232	20	217	38	254
scaf_0001047_12	p4	(ATTT)5	20	151	170	TGTGTAACGATGCGTAACGG	58.661	20	TACCATGCATTACCCCTGCT	58.778	20	113	195	307	GTGTAACGATGCGTAACGGG	59.358	20	TACCATGCATTACCCCTGCT	58.778	20	112	196	307	TGTGTAACGATGCGTAACGG	58.661	20	GTACCATGCATTACCCCTGC	58.681	20	114	195	308
scaf_0001048_17	p3	(AAT)5	15	151	165	GCAGTCAGTACGGCTTGAAT	58.273	20	GCGGAATTCTCCAGGCATTT	58.894	20	220	65	284	GTCTAAGCAGTCAGTACGGC	58.089	20	GCGGAATTCTCCAGGCATTT	58.894	20	226	59	284	GCAGTCAGTACGGCTTGAAT	58.273	20	GGATTCTGTGGTTAGTGCGG	58.63	20	236	65	300
scaf_0001048_25	p3	(AAT)5	15	151	165	CCGTAAAACAGTGGCATCGT	58.847	20	AGCTGGATGTGACCAACCTA	58.343	20	152	99	250	ACCGTAAAACAGTGGCATCG	58.847	20	AGCTGGATGTGACCAACCTA	58.343	20	153	98	250	CCGTAAAACAGTGGCATCGT	58.847	20	GAGCTGGATGTGACCAACCT	59.674	20	153	99	251
scaf_0001049_2	p3	(AAT)5	15	151	165	CGGGAACATGCATAGCCAAA	58.898	20	ACCCAGCCTTCATGGAGAAA	58.924	20	102	25	126	GGTGAAATCGGGAACATGCA	58.827	20	ACCCAGCCTTCATGGAGAAA	58.924	20	110	17	126	TGGTGAAATCGGGAACATGC	58.827	20	ACCCAGCCTTCATGGAGAAA	58.924	20	111	16	126
scaf_0001051_11	p3	(GAA)5	15	151	165	TCGCTCCAAGGATTCAACCA	59.31	20	AGGTTTGCGGCTCAAATGTA	58.096	20	173	31	203	TCGCTCCAAGGATTCAACCA	59.31	20	TAGGTTTGCGGCTCAAATGT	58.096	20	174	31	204	TCGCTCCAAGGATTCAACCA	59.31	20	TGTTGATTAGGTTTGCGGCT	58.096	20	181	31	211
scaf_0001051_19	p4	(TAAT)5	20	151	170	CAGATGAGGCCATTGTTGGT	58.157	20	TATTGGTTGGGAGCGGATGA	58.791	20	102	3	104	CAGATGAGGCCATTGTTGGT	58.157	20	TGATATTGGTTGGGAGCGGA	58.791	20	105	3	107	ACAGATGAGGCCATTGTTGG	58.157	20	TATTGGTTGGGAGCGGATGA	58.791	20	103	2	104
scaf_0001052_14	p3	(TCT)5	15	151	165	ATGACTGGCCTAACCCACTG	59.379	20	ACGGGTGATAGGATAGGGTT	57.211	20	145	107	251	ATGACTGGCCTAACCCACTG	59.379	20	AGGATAGGGTTTTGGGACTGA	58.071	21	136	107	242	ATGACTGGCCTAACCCACTG	59.379	20	AGGGTTTTGGGACTGAAAAGTG	58.969	22	131	107	237
scaf_0001053_19	p3	(AAC)9	27	151	177	CCATTGAGTCCCAACCCAGA	59.302	20	TCAGGCTTATTTGTGCGTGT	58.109	20	178	116	293	TGTCCCATTGAGTCCCAACC	59.596	20	TCAGGCTTATTTGTGCGTGT	58.109	20	182	112	293	CCATTGTCCCATTGAGTCCC	58.232	20	TCAGGCTTATTTGTGCGTGT	58.109	20	186	108	293
scaf_0001055_3	p3	(AAT)6	18	151	168	ACACCATGTCATGTCCTATGC	58.077	21	TGGGCAAGAGTTACCAATTTGG	59.103	22	187	17	203	CACCATGTCATGTCCTATGCT	57.796	21	TGGGCAAGAGTTACCAATTTGG	59.103	22	186	18	203	ACACCATGTCATGTCCTATGC	58.077	21	AGAAGATGAGGCTCAAAGCAA	57.57	21	100	17	116
scaf_0001059_14	p3	(TCT)7	21	151	171	ACCTCACTTCCTACTTCGCC	59.104	20	ACTCCACCGATACCGAACTC	58.899	20	261	2	262	CCTCACTTCCTACTTCGCCT	58.813	20	ACTCCACCGATACCGAACTC	58.899	20	260	3	262	GGTGGTTTTGGTATGCCGAA	58.751	20	ACTCCACCGATACCGAACTC	58.899	20	205	58	262
scaf_0001059_15	p3	(GAA)5	15	151	165	CAAGTTCCATTACCGCCACC	59.191	20	CGAAACTGGTGATGGTGGTG	59.126	20	102	10	111	CCAAGTTCCATTACCGCCAC	59.191	20	CGAAACTGGTGATGGTGGTG	59.126	20	103	9	111	CAAGTTCCATTACCGCCACC	59.191	20	GAAACTGGTGATGGTGGTGG	58.752	20	101	10	110
scaf_0001060_13	p3	(ATG)5	15	151	165	TGGTGGAGTTGGATATGCATT	57.332	21	TCCTCCACTGATAGCCCAAA	58.035	20	111	169	279	AATGGTGGAGTTGGATATGCA	57.332	21	TCCTCCACTGATAGCCCAAA	58.035	20	113	167	279	ATGGTGGAGTTGGATATGCAT	57.11	21	TCCTCCACTGATAGCCCAAA	58.035	20	112	168	279
scaf_0001060_15	p3	(ATG)6	18	151	168	TGATGATGATGTTGGTGGAGTT	57.694	22	TCCTCCACTGATAGCCCAAA	58.035	20	100	157	256	TGATGATGATGATGTTGGTGGAG	58.543	23	TCCTCCACTGATAGCCCAAA	58.035	20	103	154	256	GATGATGATGATGTTGGTGGAGT	58.542	23	TCCTCCACTGATAGCCCAAA	58.035	20	102	155	256
scaf_0001061_4	p3	(CAA)5	15	151	165	TAAACCCCCATGTTTTGCCG	59.03	20	CGCATCAGCAAGATATGGGG	58.837	20	122	181	302	TCTCCACCACCAACACTCAA	58.791	20	GCTCGCATTGGCAAGACATA	58.983	20	183	70	252	TTCTCCACCACCAACACTCA	58.791	20	GCTCGCATTGGCAAGACATA	58.983	20	184	69	252
scaf_0001062_6	p4	(AGGG)5	20	151	170	AGGGTGTGTGGCCATCTAAT	58.701	20	TTGAAACCTGAGCCTGCCTA	58.936	20	134	166	299	GAGGGTGTGTGGCCATCTAA	59.382	20	TTGAAACCTGAGCCTGCCTA	58.936	20	135	165	299	AGGGTGTGTGGCCATCTAAT	58.701	20	ATTTGAAACCTGAGCCTGCC	58.739	20	136	166	301
scaf_0001063_3	p4	(AAAC)6	24	151	174	TTACAACACCAGCCCCTTCA	59.153	20	GTTGCAAATGTCCCAGAGGA	58.09	20	108	215	322	TTACAACACCAGCCCCTTCA	59.153	20	AGTTGCAAATGTCCCAGAGG	58.085	20	109	215	323	CCAGCCCCTTCAGTAGTCTC	59.173	20	GTTGCAAATGTCCCAGAGGA	58.09	20	100	223	322
scaf_0001064_18	p3	(TTA)13	39	151	189	AGAGACAGGAAGAGAACCGC	59.108	20	AGGGAAGTAGCCATCATGTATGT	59.023	23	158	111	268	AGGCTGGTCAAATAACTTTCCA	57.887	22	GCGGTTCTCTTCCTGTCTCT	59.108	20	128	3	130	GCCAACTCCCCACTCTTTTC	58.752	20	AGGGAAGTAGCCATCATGTATGT	59.023	23	140	129	268
scaf_0001065_1	p3	(TCT)6	18	151	168	TATGGCGGTAGCTGGAAGAG	58.959	20	GGGCCCCCTTGGTACTTAAT	59.069	20	122	106	227	TAGCTGGAAGAGTTGTGGCA	58.944	20	GGGCCCCCTTGGTACTTAAT	59.069	20	114	114	227	TATGGCGGTAGCTGGAAGAG	58.959	20	GCCAGTCTTTCTTTCCCAGC	59.115	20	185	106	290
scaf_0001067_16	p3	(TTC)5	15	151	165	CAATTTGGTTGCTGCCTTGC	59.13	20	ATGCAGTACTCTGGCACACT	59.02	20	193	115	307	AATTTGGTTGCTGCCTTGCT	59.239	20	ATGCAGTACTCTGGCACACT	59.02	20	192	116	307	TTTGGTTGCTGCCTTGCTAT	58.369	20	ATGCAGTACTCTGGCACACT	59.02	20	190	118	307
scaf_0001070_3	p3	(TGT)5	15	151	165	GATGGTTTAGCTGAGGGGGT	59.08	20	ATCACTGGCTCTGAACCCAA	58.933	20	272	28	299	AGTGTGCCTAGGGTTTTGGA	58.854	20	ATCACTGGCTCTGAACCCAA	58.933	20	221	79	299	GATGGTTTAGCTGAGGGGGT	59.08	20	TCACTGGCTCTGAACCCAAA	59.157	20	271	28	298
scaf_0001070_12	p3	(CCA)7	21	151	171	CCACCACCACAACCATCATG	59.11	20	CAGCAGTGGTGAAAGGTTGT	58.607	20	120	162	281	TTCACTACTGCTGCCATTGC	58.832	20	GGCAGTGGTGATTATGGTGG	58.607	20	113	122	234	TTCACTACTGCTGCCATTGC	58.832	20	CAGCAGTGGTGAAAGGTTGT	58.607	20	160	122	281
scaf_0001070_13	p3	(ACT)5	15	151	165	CTCCTGTCACTGTTGGGAGT	58.948	20	TGCCTTTAAGTGCCCTCCAT	59.296	20	227	49	275	CTCCTGTCACTGTTGGGAGT	58.948	20	ATGCCTTTAAGTGCCCTCCA	59.296	20	228	49	276	CTCCTGTCACTGTTGGGAGT	58.948	20	GCCTTTAAGTGCCCTCCATC	58.606	20	226	49	274
scaf_0001070_14	p4	(AATA)5	20	151	170	AATATCCTGTGCATGTTCCTCA	57.491	22	TTATTTCGTTGCCATGGCCG	59.546	20	100	201	300	AATATCCTGTGCATGTTCCTCA	57.491	22	TTTATTTCGTTGCCATGGCC	57.336	20	101	201	301	ATCCTGTGCATGTTCCTCATC	58.072	21	TATTTATTTCGTTGCCATGGCC	57.685	22	100	204	303
scaf_0001070_18	p3	(TTC)5	15	151	165	TGTTCCACATCACCCTGTGT	59.157	20	GAACACTGATGGATCACTCACA	58.07	22	137	131	267	GCATGTTCCACATCACCCTG	59.187	20	GAACACTGATGGATCACTCACA	58.07	22	140	128	267	TCTCCTGTGCATGTTCCACA	59.236	20	GAACACTGATGGATCACTCACA	58.07	22	148	120	267
scaf_0001071_8	p3	(TGG)7	21	151	171	TCAAGATCTGGTGGTGGTGG	59.308	20	CTCGCTGTAACGATTGGCTC	59.076	20	134	142	275	TGTCAAGATCTGGTGGTGGT	58.566	20	CTCGCTGTAACGATTGGCTC	59.076	20	136	140	275	TGGTGGTGGTGGGTAGGATA	59.582	20	CTCGCTGTAACGATTGGCTC	59.076	20	117	159	275
scaf_0001071_11	p3	(ATT)5	15	151	165	GACGGTGGGTGGATGTTTTC	59.121	20	CAAGACTCCCAAGCTCCTCA	59.02	20	105	185	289	GACGGTGGGTGGATGTTTTC	59.121	20	AGGTGTCCAAGACTCCCAAG	58.94	20	112	185	296	GACGGTGGGTGGATGTTTTC	59.121	20	AACAGGTGTCCAAGACTCCC	59.234	20	115	185	299
scaf_0001073_3	p3	(AAT)6	18	151	168	TGGTAACTTTTTGGCCGCTT	58.595	20	ATTTGTTGCGATTTGGCGTG	58.583	20	100	7	106	TTGGTAACTTTTTGGCCGCT	58.595	20	ATTTGTTGCGATTTGGCGTG	58.583	20	101	6	106	TTGGTAACTTTTTGGCCGCT	58.595	20	TTTGTTGCGATTTGGCGTGA	59.618	20	100	6	105
scaf_0001075_18	p3	(ATA)7	21	151	171	TTCCTAGTGGCACGGACATT	59.019	20	TGGTGCCTTTCTGTGTTGTG	58.898	20	202	24	225	TTCCTAGTGGCACGGACATT	59.019	20	GGTGCCTTTCTGTGTTGTGT	58.897	20	201	24	224	TTCCTAGTGGCACGGACATT	59.019	20	AGATGCGGCCGCTTTTATTC	59.337	20	235	24	258
scaf_0001076_13	p3	(TCT)9	27	298	324	TCTCTTTCTCCTTCCCCGTT	57.974	20	CGATTGTTGAAATAGCGCGC	58.895	20	108	126	233	TCTCTTTCTCCTTCCCCGTT	57.974	20	GCGATTGTTGAAATAGCGCG	58.895	20	109	126	234	TCTCTTTCTCCTTCCCCGTT	57.974	20	TGAAGAATCGGGGCAGCATA	59.163	20	142	126	267
scaf_0001076_14	p3	(TCT)9	27	151	177	CGCGCTATTTCAACAATCGC	58.895	20	TTTGCTCTGCCTCTCTCACA	58.949	20	153	68	220	GCGCGCTATTTCAACAATCG	58.895	20	TTTGCTCTGCCTCTCTCACA	58.949	20	154	67	220	CGCGCTATTTCAACAATCGC	58.895	20	GCTTTTGCTCTGCCTCTCTC	58.914	20	156	68	223
scaf_0001077_14	p3	(GAT)5	15	151	165	GGGAGTCTGCCCTAAAATCTT	57.346	21	TCCTCCACCAATAGCCCAAA	58.622	20	215	72	286	GGGAGTCTGCCCTAAAATCTT	57.346	21	ATCCTCCACCAATAGCCCAA	58.393	20	216	72	287	GGGAGTCTGCCCTAAAATCTT	57.346	21	ATCCTCCACCAATAGCCCAAA	59.071	21	216	72	287
scaf_0001078_16	p4	(TTTG)5	20	151	170	TGGGAAGTGAGGAACGACTC	59.033	20	AGCTCTGGTTTTGGGGAAGA	58.851	20	150	44	193	TGGGAAGTGAGGAACGACTC	59.033	20	CTCGTCTCTCCTTCCAGCTT	58.818	20	181	44	224	TTCAATCTCGGGTCTCCTCG	58.896	20	AGCTCTGGTTTTGGGGAAGA	58.851	20	110	84	193
scaf_0001079_8	p3	(TTA)14	42	151	192	GTTGTGCTAATTTGGCCCCA	59.027	20	GAGCCAAAGTAAAATGACACCA	57.153	22	202	34	235	GTTGTGCTAATTTGGCCCCA	59.027	20	TGAGCCAAAGTAAAATGACACC	57.153	22	203	34	236	AGTTGTGCTAATTTGGCCCC	58.734	20	GAGCCAAAGTAAAATGACACCA	57.153	22	203	33	235
scaf_0001079_9	p3	(TTA)14	42	2	43	GGTGTCATTTTACTTTGGCTCA	57.153	22	AGCCAAATACCTGCACCTCT	59.005	20	211	66	276	TGGTGTCATTTTACTTTGGCTC	57.153	22	AGCCAAATACCTGCACCTCT	59.005	20	212	65	276	GGTGTCATTTTACTTTGGCTCA	57.153	22	AATGCGAGCCAAATACCTGC	59.259	20	217	66	282
scaf_0001080_4	p3	(TGG)5	15	151	165	TGGCCTCATATGTGTGGATTT	57.332	21	GAAATTCCACCACCACCACC	59.034	20	154	17	170	ATGGCCTCATATGTGTGGATT	57.11	21	GAAATTCCACCACCACCACC	59.034	20	155	16	170	TGGCCTCATATGTGTGGATTTT	58.02	22	GAAATTCCACCACCACCACC	59.034	20	154	17	170
scaf_0001080_8	p3	(GCA)5	15	151	165	CCTGTACTGAGCACCTCCAA	59.023	20	GTGGCACAAAAACCGCAAAT	58.705	20	109	93	201	ACACCTGTACTGAGCACCTC	59.03	20	GTGGCACAAAAACCGCAAAT	58.705	20	112	90	201	GCCTGCAATTTCTCCAGCAT	59.178	20	GTGGCACAAAAACCGCAAAT	58.705	20	158	44	201
scaf_0001080_16	p3	(CCT)13	39	151	189	TTCTCAAGGCTCTCCACAGG	59.02	20	GAGGAGGAGGAGGAGGAGG	59.458	19	100	81	180	TTCTCAAGGCTCTCCACAGG	59.02	20	GGAGGAGGAGGAGGAGGAG	59.458	19	101	81	181	TTCTCAAGGCTCTCCACAGG	59.02	20	GAGGAGGAGGAGGAGGAGG	59.458	19	103	81	183
scaf_0001082_28	p3	(TTA)9	27	151	177	CTGCCCCTGGTTAGCATTTC	58.894	20	AGCATTGATCACCGAGCAAC	58.91	20	220	54	273	CCCTGGTTAGCATTTCCCCT	59.369	20	AGCATTGATCACCGAGCAAC	58.91	20	216	58	273	ACACCCTCAAACCTATGGCT	58.627	20	AGCATTGATCACCGAGCAAC	58.91	20	238	36	273
scaf_0001083_20	p3	(GAT)5	15	151	165	AGCCTAACCCTTCTTCGCTT	59.015	20	CCCTAAGAAAGAGATGGGGGA	58.223	21	138	13	150	AGCCTAACCCTTCTTCGCTT	59.015	20	TCCCTAAGAAAGAGATGGGGG	58.223	21	139	13	151	AGCCTAACCCTTCTTCGCTT	59.015	20	CCCTAAGAAAGAGATGGGGGAA	58.877	22	138	13	150
scaf_0001085_11	p3	(ATT)12	36	151	186	ATAGTGGAAAGCGAGGGGAG	58.876	20	AGGGGGTGTAGGTAATTTGCT	58.715	21	270	16	285	ATAGTGGAAAGCGAGGGGAG	58.876	20	AATCTCAAGGGGGTGTAGGT	57.639	20	277	16	292	TGGAAAGCGAGGGGAGAAAA	59.231	20	AGGGGGTGTAGGTAATTTGCT	58.715	21	266	20	285
scaf_0001088_3	p3	(AAT)6	18	272	289	CTTTATGCGTGCCGGCTAAA	59.27	20	GCCATCCCACCTAACCAGTA	58.79	20	248	0	247	CTTTATGCGTGCCGGCTAAA	59.27	20	TTTGCCATCCCACCTAACCA	59.219	20	251	0	250	TTATGCGTGCCGGCTAAATG	59.34	20	GCCATCCCACCTAACCAGTA	58.79	20	246	2	247
scaf_0001088_5	p3	(ATA)5	15	33	47	CGGTTGGAGTGAAAGAACCA	58.038	20	GTCGATCTTCAAATCAAAGTCCC	57.777	23	168	123	290	ACGGTTGGAGTGAAAGAACC	58.037	20	GTCGATCTTCAAATCAAAGTCCC	57.777	23	169	122	290	TCACGGTTGGAGTGAAAGAAC	58.443	21	TGAACTAGGGTTTTCAAGGTACG	58.366	23	100	120	219
scaf_0001088_7	p3	(GAA)5	15	151	165	GAACACGATGACGACTGACA	57.954	20	TTGTCCAGTCCAGGAGCTTC	59.313	20	123	162	284	GAACACGATGACGACTGACA	57.954	20	ACTTGTTGTCCAGTCCAGGA	58.493	20	128	162	289	GAACACGATGACGACTGACA	57.954	20	CAGTCCAGGAGCTTCGTAGG	59.542	20	118	162	279
scaf_0001089_3	p3	(GAG)6	18	151	168	CGGAGTGAGTTCTGTGCCTA	59.111	20	CTCCTCCTCCTCCTCCTCTT	59.066	20	155	13	167	CGGAGTGAGTTCTGTGCCTA	59.111	20	TCCTCCTCCTCCTCCTCTTC	59.069	20	154	13	166	CGGAGTGAGTTCTGTGCCTA	59.111	20	ATCCTCGAACTCCTCCTCCT	59.069	20	164	13	176
scaf_0001090_22	p3	(AGC)6	18	151	168	GTAAGCCACCAATAGCCAGC	58.975	20	GGTTGTTGTTGGCTGCTGTA	58.971	20	176	19	194	CAACCCATAGCAGCAACCAG	59.187	20	GGTTGTTGTTGGCTGCTGTA	58.971	20	142	53	194	GTAAGCCACCAATAGCCAGC	58.975	20	ACTGGCATGGGTTGTTGTTG	59.248	20	185	19	203
scaf_0001091_4	p3	(AGA)7	21	151	171	TTTTTGGTGGGAATGGGGGT	59.731	20	CCCTTAGGTTGTGTGGCCTT	59.888	20	217	69	285	TTTTTGGTGGGAATGGGGGT	59.731	20	CCTTAGGTTGTGTGGCCTTT	58.005	20	216	69	284	GGGTGTGAGGTCGAATGGTT	59.964	20	CCCTTAGGTTGTGTGGCCTT	59.888	20	201	85	285
scaf_0001091_13	p3	(CCG)8	24	151	174	ACCACCACTACAACCACCAT	58.854	20	CAACCTGCATGTACCTGAGC	58.91	20	209	54	262	ACCACCACTACAACCACCAT	58.854	20	TTTGCTGGTAGAGGTAGGGC	59.09	20	139	54	192	CCACTACTCCATCACCACCA	58.724	20	CAACCTGCATGTACCTGAGC	58.91	20	222	41	262
scaf_0001091_15	p3	(TTC)6	18	151	168	CTACCACCGCCCATAATCCT	58.943	20	TGTTCTTCGCCGAACACATG	59.135	20	237	30	266	ACCGCCCATAATCCTTCTCC	59.234	20	TGTTCTTCGCCGAACACATG	59.135	20	232	35	266	CCGCCCATAATCCTTCTCCA	59.235	20	TGTTCTTCGCCGAACACATG	59.135	20	231	36	266
scaf_0001093_2	p3	(GTT)6	18	151	168	CGGGTCATGTTGTGTTGGAG	59.126	20	ACAGCCACCTACTCCCAAAA	58.854	20	105	194	298	ACCTGTTTGTGACCTCAGCT	59.16	20	ACAGCCACCTACTCCCAAAA	58.854	20	128	171	298	GTACCGGGTGTGGGAATAGT	58.802	20	CTCCAACACAACATGACCCG	59.126	20	119	95	213
scaf_0001093_8	p3	(AGC)5	15	151	165	GAGTAAGCACCTTTGTGGCT	58.102	20	ACACTCGCATGCACCATAAC	58.913	20	100	215	314	AGAGTAAGCACCTTTGTGGC	58.102	20	ACACTCGCATGCACCATAAC	58.913	20	101	214	314	CAGCAACGTGAGAGAGGAAA	57.845	20	ACACTCGCATGCACCATAAC	58.913	20	154	161	314
scaf_0001094_4	p3	(ATT)5	15	151	165	TCAGTTTCTGATGTGGACATGT	57.644	22	TGTTTGGTGTAGCTGTTGGA	57.28	20	243	50	292	TCAGTTTCTGATGTGGACATGT	57.644	22	TGTTTGGTGTAGCTGTTGGAT	57.778	21	243	50	292	TCAGTTTCTGATGTGGACATGT	57.644	22	ATGTTTGGTGTAGCTGTTGGA	57.778	21	244	50	293
scaf_0001094_11	p3	(TTC)9	27	151	177	CCTCTCCAGACCCAAACCTT	58.932	20	GGGCTATGAGGGTGGTGTTA	58.79	20	274	43	316	AACCTACTAGCGTCACCACC	59.107	20	GGGCTATGAGGGTGGTGTTA	58.79	20	232	85	316	CTCTCCTCCATCACTGCCAT	58.87	20	GGGCTATGAGGGTGGTGTTA	58.79	20	213	104	316
scaf_0001095_9	p3	(TCG)5	15	151	165	GTAACGCCATTGTCCCCATC	58.978	20	GGGTACAGGTGTTAGGCCTT	59.01	20	196	65	260	GTAACGCCATTGTCCCCATC	58.978	20	ATTCACCTTCGAGGGAAGCA	59.016	20	173	65	237	CTAGGGACTCCATCGTCGTC	59.054	20	GGGTACAGGTGTTAGGCCTT	59.01	20	123	138	260
scaf_0001096_5	p3	(GTG)5	15	151	165	AAAGTAGTGGTGGTGGTGGT	58.781	20	TCCCTTTGACCTGGTACATCC	59.087	21	160	144	303	TAGTGGTGGTGGTGGTGAAG	59.238	20	TCCCTTTGACCTGGTACATCC	59.087	21	156	148	303	AAAGTAGTGGTGGTGGTGGT	58.781	20	TGACCTGGTACATCCACAACT	58.665	21	154	144	297
scaf_0001096_11	p3	(GAA)5	15	456	470	CTTCCTGAACCAGAGGCTGA	59.02	20	CTGCTGCTGCTGTTCTTCTT	58.763	20	159	48	206	TCTTCCTGAACCAGAGGCTG	59.02	20	CTGCTGCTGCTGTTCTTCTT	58.763	20	160	47	206	CCTCCCTCTTCCTGAACCAG	59.092	20	CTGCTGCTGCTGTTCTTCTT	58.763	20	166	41	206
scaf_0001099_12	p3	(ATT)5	15	151	165	AATGGTCCTACGCAATGTGC	58.905	20	CAAGTCCTCCAACAAACACAGT	58.983	22	174	57	230	TGGTCCTACGCAATGTGCTA	59.101	20	CAAGTCCTCCAACAAACACAGT	58.983	22	172	59	230	ACGCAATGTGCTAACTTGCT	58.762	20	CAAGTCCTCCAACAAACACAGT	58.983	22	165	66	230
scaf_0001099_15	p4	(TTAT)5	20	151	170	TTGAAACAAGCACCTCGTGT	58.255	20	TGCATACACTTAGCAAAACCCT	58.238	22	211	109	319	TTTGAAACAAGCACCTCGTGT	58.912	21	TGCATACACTTAGCAAAACCCT	58.238	22	212	108	319	GGTTTGAAACAAGCACCTCG	57.88	20	TGCATACACTTAGCAAAACCCT	58.238	22	214	106	319
scaf_0001100_9	p3	(ATT)15	45	151	195	AGAGGGCAATGACTGAAGGT	58.634	20	ATGCACAAGGATCACATGCG	59.263	20	101	3	103	GAGGGCAATGACTGAAGGTG	58.543	20	ATGCACAAGGATCACATGCG	59.263	20	100	4	103	AGGGCAATGACTGAAGGTGA	58.933	20	AGATGCACAAGGATCACATGC	58.978	21	101	5	105
scaf_0001104_3	p3	(AAT)5	15	151	165	GGTGATGGCACTGTTTGTCT	58.391	20	TTTATTCTACGCAGGCCGGT	59.462	20	112	30	141	AGGTGATGGCACTGTTTGTC	58.391	20	TTTATTCTACGCAGGCCGGT	59.462	20	113	29	141	GGTGATGGCACTGTTTGTCT	58.391	20	ACGCAGGCCGGTGATAAATA	59.533	20	104	30	133
scaf_0001107_5	p3	(TTA)15	45	151	195	TGGCCAAATTCGATTATGGTCT	58.103	22	ATCATCATGCCACGTCATGC	59.051	20	227	77	303	GGCCAAATTCGATTATGGTCTG	57.771	22	ATCATCATGCCACGTCATGC	59.051	20	226	78	303	GGCCAAATTCGATTATGGTCTGT	59.368	23	ATCATCATGCCACGTCATGC	59.051	20	226	78	303
scaf_0001107_7	p3	(TTA)5	15	151	165	ACAGGTATGCTGATGTGGCA	59.38	20	TGGCTCCTTGATCTCAGCAA	59.013	20	123	177	299	ACAGGTATGCTGATGTGGCA	59.38	20	TTGGCTCCTTGATCTCAGCA	59.013	20	124	177	300	ATGCTGATGTGGCATGACAG	58.61	20	TGGCTCCTTGATCTCAGCAA	59.013	20	117	183	299
scaf_0001108_6	p3	(ATA)6	18	151	168	CAGAGGCAAGGAACAATGCA	58.75	20	TCTGACAATTGTGGCTGGAC	58.104	20	184	113	296	CAGAGGCAAGGAACAATGCA	58.75	20	CTGACAATTGTGGCTGGACT	58.098	20	183	113	295	CAGAGGCAAGGAACAATGCA	58.75	20	TTCTGACAATTGTGGCTGGAC	58.77	21	185	113	297
scaf_0001110_6	p4	(AATA)6	24	151	174	TGGTTGCTCCCCACCATTAA	59.219	20	AGAGGGTGTGACTTGAACTGA	58.601	21	172	88	259	TTGGTTGCTCCCCACCATTA	59.219	20	AGAGGGTGTGACTTGAACTGA	58.601	21	173	87	259	TCTAAGTTGGTTGCTCCCCA	58.559	20	AGAGGGTGTGACTTGAACTGA	58.601	21	179	81	259
scaf_0001112_9	p3	(CAA)5	15	151	165	CACTCAACATGCCGACTACG	59.008	20	CCATCGGTAAAAGCTAGAGCC	58.515	21	150	101	250	CACTCAACATGCCGACTACG	59.008	20	CCCATCGGTAAAAGCTAGAGC	58.515	21	151	101	251	CTCCCACAGCAACAACAACA	58.898	20	CCATCGGTAAAAGCTAGAGCC	58.515	21	110	141	250
scaf_0001112_15	p3	(ACC)8	24	151	174	TATACCACCACCACCACCAC	59.014	20	GGTTGAGATGGTGTTGGTGG	58.752	20	108	147	254	CGTCTATACCACCACCACCA	58.812	20	GGTTGAGATGGTGTTGGTGG	58.752	20	112	143	254	CACCGTCTATACCACCACCA	58.812	20	GGTTGAGATGGTGTTGGTGG	58.752	20	115	140	254
scaf_0001113_2	p4	(AAAT)5	20	151	170	AGTTCCTGTGAATTGTTCGCT	58.149	21	ACCGTTCACATCAATTGCCA	58.385	20	224	63	286	CAGTTCCTGTGAATTGTTCGC	58.079	21	ACCGTTCACATCAATTGCCA	58.385	20	225	62	286	AGTTCCTGTGAATTGTTCGCT	58.149	21	TCCTCTCCTCCTAGTACCGT	58.109	20	239	63	301
scaf_0001113_3	p3	(AAT)8	24	151	174	CCAAAGCAAGGGCAGACTTT	58.957	20	AGAACTGAACTTCTCTGGCTCT	58.761	22	204	34	237	TCAGTTACCCTGCCACTTGT	58.863	20	AGAACTGAACTTCTCTGGCTCT	58.761	22	154	84	237	CTTCCAAAGCAAGGGCAGAC	59.4	20	AGAACTGAACTTCTCTGGCTCT	58.761	22	207	31	237
scaf_0001113_13	p3	(CTC)10	30	151	180	CACTGTTCCGGTTTCCAAGG	59.048	20	ACAACTGGTGTAGGGAGAGC	59.023	20	195	43	237	CACTGTTCCGGTTTCCAAGG	59.048	20	GAGGAGGAGGAGGAGGAGAA	59.069	20	125	43	167	CACTGTTCCGGTTTCCAAGG	59.048	20	ATGAGGAGGAGGAGGAGGAG	59.14	20	139	43	181
scaf_0001117_2	p3	(AAC)9	27	151	177	ACGAAGTGTTGTCCTGTGTTC	58.723	21	CGGACTGATTTTGGAACCGA	58.197	20	137	186	322	ACGAAGTGTTGTCCTGTGTTC	58.723	21	TCGGACTGATTTTGGAACCG	58.197	20	138	186	323	ACGAAGTGTTGTCCTGTGTT	57.603	20	CGGACTGATTTTGGAACCGA	58.197	20	137	186	322
scaf_0001118_8	p3	(TCT)7	21	151	171	GAGCTTGTTGAGGGTTTCGT	58.406	20	ACCCTAACCTCATCTTCATGCT	58.881	22	223	78	300	GAGCTTGTTGAGGGTTTCGT	58.406	20	AGCTCAAACCCTAACCTCATCT	58.815	22	230	78	307	AGAGCTTGTTGAGGGTTTCG	58.116	20	ACCCTAACCTCATCTTCATGCT	58.881	22	224	77	300
scaf_0001119_12	p3	(ATA)15	45	151	195	GGGCGTAGGTTTTGTTAGCC	59.193	20	TGTGTAGATGTAGCGGGTGC	59.825	20	185	30	214	GGGCGTAGGTTTTGTTAGCC	59.193	20	ACTGTGTAGATGTAGCGGGT	58.151	20	187	30	216	GCGTAGGTTTTGTTAGCCGA	58.569	20	TGTGTAGATGTAGCGGGTGC	59.825	20	183	32	214
scaf_0001119_12	p3	(ATA)7	21	313	333	GGGCGTAGGTTTTGTTAGCC	59.193	20	TGTGTAGATGTAGCGGGTGC	59.825	20	185	30	214	GGGCGTAGGTTTTGTTAGCC	59.193	20	ACTGTGTAGATGTAGCGGGT	58.151	20	187	30	216	GCGTAGGTTTTGTTAGCCGA	58.569	20	TGTGTAGATGTAGCGGGTGC	59.825	20	183	32	214
scaf_0001119_13	p3	(ATA)11	33	1	33	TCGTGAATTGAGGGAGCAGT	59.023	20	GCCACAAAGAATGCTCATGC	58.363	20	142	173	314	TCGTGAATTGAGGGAGCAGT	59.023	20	TTGGCCACAAAGAATGCTCA	58.298	20	145	173	317	GCAGTCCCCTCCTCGTAATT	59.169	20	GCCACAAAGAATGCTCATGC	58.363	20	127	188	314
scaf_0001119_13	p3	(ATA)7	21	151	171	TCGTGAATTGAGGGAGCAGT	59.023	20	GCCACAAAGAATGCTCATGC	58.363	20	142	173	314	TCGTGAATTGAGGGAGCAGT	59.023	20	TTGGCCACAAAGAATGCTCA	58.298	20	145	173	317	GCAGTCCCCTCCTCGTAATT	59.169	20	GCCACAAAGAATGCTCATGC	58.363	20	127	188	314
scaf_0001122_8	p4	(AGAC)5	20	151	170	GAACCATCTCTGCAAGTCGC	59.276	20	AAGATCGTTGCTCACCCTCA	59.023	20	266	30	295	TGCCTTGCCTCAAACTCTTG	58.679	20	AAGATCGTTGCTCACCCTCA	59.023	20	236	60	295	GAACCATCTCTGCAAGTCGC	59.276	20	ATCAAGGCCAAGATCGTTGC	58.902	20	275	30	304
scaf_0001122_14	p4	(GAAA)5	20	151	170	ACGAAGATGTATCAAACCGACAC	59.075	23	TTGGGAACACTCCATCCACA	58.855	20	211	16	226	CGAAGATGTATCAAACCGACACT	58.826	23	TTGGGAACACTCCATCCACA	58.855	20	210	17	226	ACGAAGATGTATCAAACCGACA	57.817	22	TTGGGAACACTCCATCCACA	58.855	20	211	16	226
scaf_0001124_5	p3	(ATT)5	15	151	165	ATTTTTAAAGGGTCGCGGGG	58.821	20	TCCACTTTGTCCTCCATGCT	58.933	20	146	108	253	GTCCTATGCTTGGTTCAGCC	58.616	20	TCCACTTTGTCCTCCATGCT	58.933	20	189	65	253	ATTTTTAAAGGGTCGCGGGG	58.821	20	CTCCACTTTGTCCTCCATGC	58.543	20	147	108	254
scaf_0001125_5	p4	(AATA)6	24	275	298	TAGCCACTTCCCAAACGAGG	59.676	20	TGGTGTGGGTTCCATCTTGA	58.855	20	150	57	206	TAGCCACTTCCCAAACGAGG	59.676	20	TGGTAATGGTGTGGGTTCCA	58.85	20	156	57	212	ACTTCCCAAACGAGGCCTTT	59.815	20	TGGTGTGGGTTCCATCTTGA	58.855	20	145	62	206
scaf_0001125_6	p4	(AATA)6	24	151	174	CCTTACTGAGCTGGCACCTT	59.674	20	AGAGCTCCTCTAATGAGATGGT	57.802	22	103	4	106	TTACTGAGCTGGCACCTTCC	59.675	20	AGAGCTCCTCTAATGAGATGGT	57.802	22	101	6	106	CTTACTGAGCTGGCACCTTC	58.268	20	AGAGCTCCTCTAATGAGATGGT	57.802	22	102	5	106
scaf_0001125_17	p4	(TCTA)8	32	151	182	AACTCTCCCGGACTCTCTCT	59.003	20	CCTTGGCTCTCCATACTCGT	58.885	20	187	115	301	TGTTCAACTCTCCCGGACTC	59.033	20	CCTTGGCTCTCCATACTCGT	58.885	20	192	110	301	AACTCTCCCGGACTCTCTCT	59.003	20	CGTAGCTTCTCCTTGGCTCT	59.179	20	197	115	311
scaf_0001125_41	p4	(TTAT)5	20	151	170	TCTCACAAGAGCTTATGAACCAC	58.43	23	CTGCATGAGTACGATTGCCA	58.345	20	243	27	269	TCTCACAAGAGCTTATGAACCAC	58.43	23	ACTGCATGAGTACGATTGCC	58.343	20	244	27	270	CTCACAAGAGCTTATGAACCACT	58.426	23	CTGCATGAGTACGATTGCCA	58.345	20	242	28	269
scaf_0001127_21	p3	(CGG)6	18	151	168	ACTGACCTAACCCACACTCG	59.033	20	CAACACTTGGGTTGGGTCC	58.574	19	147	115	261	ACTGACCTAACCCACACTCG	59.033	20	CAACACTTGGGTTGGGTCCC	61.113	20	147	115	261	CTGACCTAACCCACACTCGG	59.753	20	CAACACTTGGGTTGGGTCC	58.574	19	146	116	261
scaf_0001130_6	p3	(GTG)5	15	151	165	AGCCACCAATATCGTACCCA	58.497	20	CTACCACAACACCACAACCG	59.058	20	219	9	227	AGCCACCAATATCGTACCCA	58.497	20	TCGCCACTTCTCACTACAGG	59.111	20	176	9	184	AGCCACCAATATCGTACCCA	58.497	20	CACCACAACCGGTTCTGATG	59.126	20	210	9	218
scaf_0001132_5	p3	(TTA)14	42	151	192	TGTAGTTTGAATGCCGCGTT	58.769	20	TCATGCAAGTGGAAATGACACA	58.779	22	252	84	335	TTGTAGTTTGAATGCCGCGT	58.769	20	TCATGCAAGTGGAAATGACACA	58.779	22	253	83	335	TGTAGTTTGAATGCCGCGTT	58.769	20	CATGCAAGTGGAAATGACACA	57.353	21	251	84	334
scaf_0001134_7	p3	(GAG)8	24	151	174	CACTCACAACAGCCACAACA	58.906	20	CTTTGTGCTCTTCCACGTCC	59.132	20	183	105	287	ACAACAGCCACAACAAAGCA	59.106	20	CTTTGTGCTCTTCCACGTCC	59.132	20	178	110	287	TCTCCAACACCATCACCACA	58.864	20	CTTTGTGCTCTTCCACGTCC	59.132	20	236	52	287
scaf_0001134_15	p3	(AAT)6	18	151	168	GCTATGGACACTTGGGGGAT	59.153	20	ACTATCCATGGGAGATGTGCA	58.588	21	248	66	313	CCCAAACACGCTATGGACAC	59.198	20	ACTATCCATGGGAGATGTGCA	58.588	21	257	57	313	TCCCAAACACGCTATGGACA	59.312	20	ACTATCCATGGGAGATGTGCA	58.588	21	258	56	313
scaf_0001138_13	p4	(AAAG)8	32	151	182	ACTGCTGGAACGGTAATGGA	59.019	20	AGAACTTCAGGTGCCATCCA	58.933	20	239	57	295	TGCGATTTTGGCCTATCACG	58.986	20	CAGGCTGCAGTTCAATGACA	58.759	20	271	3	273	GCGATTTTGGCCTATCACGT	58.986	20	CAGGCTGCAGTTCAATGACA	58.759	20	270	4	273
scaf_0001140_18	p3	(GAA)10	30	151	180	AGGATCCACAAACCCTAGGC	59.08	20	TCTTCCCTGTCTAATCTTCCCA	57.925	22	129	26	154	GGATCCACAAACCCTAGGCA	59.376	20	TCTTCCCTGTCTAATCTTCCCA	57.925	22	128	27	154	AGGATCCACAAACCCTAGGC	59.08	20	TCTTCCCTGTCTAATCTTCCCAA	58.565	23	129	26	154
scaf_0001142_2	p3	(AGG)5	15	151	165	TTGAGACGACAAATGTGCCG	59.135	20	TAGTGTGGTTAGCCTGCTCC	59.097	20	168	15	182	TTGAGACGACAAATGTGCCG	59.135	20	CTGGCCCTCAAACCAATGAC	59.109	20	190	15	204	TTGAGACGACAAATGTGCCG	59.135	20	GGCCCTCAAACCAATGACAA	58.663	20	188	15	202
scaf_0001143_20	p3	(ATT)6	18	151	168	TACGACATGATACGCGTGGA	58.984	20	CATTCCACGGAGACAAACCC	58.835	20	243	69	311	CGACATGATACGCGTGGAAT	58.513	20	CATTCCACGGAGACAAACCC	58.835	20	241	71	311	TACGACATGATACGCGTGGA	58.984	20	GGAGACAAACCCCGTCTTGT	59.892	20	235	69	303
scaf_0001145_22	p3	(TTA)7	21	151	171	CCATGCATGCGTAGACTGAC	59.067	20	TCGAACAGAGTGACTTGTACCT	58.78	22	227	18	244	CTCACTTTCATGGGTGGTGC	59.116	20	TCGAACAGAGTGACTTGTACCT	58.78	22	183	62	244	TCCCTCACTTTCATGGGTGG	59.302	20	TCGAACAGAGTGACTTGTACCT	58.78	22	186	59	244
scaf_0001148_5	p3	(TTC)12	36	151	186	TGGCATGCTGAAAGTTGTCC	59.039	20	AGTCACAAGCTTCTCCACGA	58.959	20	278	43	320	GCATGCTGAAAGTTGTCCGA	59.126	20	AGTCACAAGCTTCTCCACGA	58.959	20	276	45	320	TGGCATGCTGAAAGTTGTCC	59.039	20	GTCACAAGCTTCTCCACGAC	58.859	20	277	43	319
scaf_0001149_5	p4	(TTTC)6	24	151	174	CCTTCTTAGAAGTGTCCGTGC	58.662	21	TGCCCTATTGAGTCAGTAATGC	58.191	22	106	21	126	CCTTCTTAGAAGTGTCCGTGC	58.662	21	GCCCTATTGAGTCAGTAATGCT	57.921	22	105	21	125	CCTTCTTAGAAGTGTCCGTGC	58.662	21	GCCCTATTGAGTCAGTAATGCTG	59.188	23	105	21	125
scaf_0001149_10	p3	(GAA)5	15	151	165	ACAGGACTTCACACCCTTTCA	59.156	21	GGAGTGTAATCCCTAGCCCC	58.943	20	171	64	234	ACAGGACTTCACACCCTTTCA	59.156	21	TGCCATTCCTACCTCCACTG	59.088	20	126	64	189	ACAGGACTTCACACCCTTTCA	59.156	21	CCATTCCTACCTCCACTGCT	58.792	20	124	64	187
scaf_0001150_6	p3	(ATG)5	15	151	165	AGCCCCATCGCTAATCACTT	59.16	20	TTGTTGTAGTGCCCAGACGA	59.246	20	180	8	187	TTGTGAGCCCCATCGCTAAT	59.454	20	TTGTTGTAGTGCCCAGACGA	59.246	20	185	3	187	ATTGTGAGCCCCATCGCTAA	59.454	20	TTGTTGTAGTGCCCAGACGA	59.246	20	186	2	187
scaf_0001150_8	p3	(AGA)5	15	151	165	CTTGACCAGATGATGCCACG	58.988	20	GCTTGGAAAATCTAGCTTCCTCT	58.478	23	154	44	197	CTTGACCAGATGATGCCACG	58.988	20	AGCTTGGAAAATCTAGCTTCCTC	58.478	23	155	44	198	CTTGACCAGATGATGCCACG	58.988	20	AGCTTGGAAAATCTAGCTTCCT	57.417	22	155	44	198
scaf_0001151_16	p3	(GGC)6	18	151	168	GTAGTGACGGTAGGTGGTGG	59.471	20	CACCCACCCACTACCACC	59.246	18	138	118	255	GTAGTGACGGTAGGTGGTGG	59.471	20	CCACCCACCCACTACCAC	59.246	18	139	118	256	GTAGTGACGGTAGGTGGTGG	59.471	20	CACCACCCACCCACTACC	59.246	18	141	118	258
scaf_0001152_9	p3	(CGG)5	15	151	165	TCCCGCTCATTCACTCACTT	59.023	20	CGTCAATGCCGTGAGAAACA	59.135	20	102	50	151	TCTCTCCCGCTCATTCACTC	58.893	20	CGTCAATGCCGTGAGAAACA	59.135	20	106	46	151	TCTCTCTCCCGCTCATTCAC	58.893	20	CGTCAATGCCGTGAGAAACA	59.135	20	108	44	151
scaf_0001159_8	p3	(TCT)5	15	151	165	CCCAGGCCTTCGTTATGACT	59.458	20	GAGAGATGCAAGAGGGGTCA	58.801	20	125	7	131	TCCCAGGCCTTCGTTATGAC	59.46	20	GAGAGATGCAAGAGGGGTCA	58.801	20	126	6	131	GTCCCAGGCCTTCGTTATGA	59.46	20	GAGAGATGCAAGAGGGGTCA	58.801	20	127	5	131
scaf_0001159_14	p3	(AGA)6	18	151	168	AGCTCACCAGATAGCAACTGA	58.817	21	CGGAGGAGTACGATACGACC	59.136	20	108	117	224	AGCTCACCAGATAGCAACTGA	58.817	21	TATTTGGCTGTGTCGGAGGA	58.728	20	121	117	237	AGCTCACCAGATAGCAACTGA	58.817	21	CTGTGTCGGAGGAGTACGAT	58.619	20	114	117	230
scaf_0001161_14	p3	(AAT)5	15	151	165	GCAGGGTTAAGCAGGGTAGA	59.09	20	AGATTGGGCATTCGGACATT	57.558	20	264	13	276	TGCAGGGTTAAGCAGGGTAG	59.382	20	AGATTGGGCATTCGGACATT	57.558	20	265	12	276	TAGGTGCAGGGTTAAGCAGG	59.382	20	AGATTGGGCATTCGGACATT	57.558	20	269	8	276
scaf_0001161_15	p3	(AAT)5	15	295	309	AGCTGCTTCCTCCTCAATCC	59.454	20	TGTATGACGCCCTTGACTGA	58.738	20	207	24	230	CCGTTTGGTGCAAGTTGTTC	58.445	20	TGTATGACGCCCTTGACTGA	58.738	20	162	69	230	GCTGCTTCCTCCTCAATCCA	59.746	20	TGTATGACGCCCTTGACTGA	58.738	20	206	25	230
scaf_0001162_16	p3	(AAT)7	21	151	171	GCATCAAGTTTGGCAATTGCT	58.58	21	TGTTGGATTTTTCCCACTGTGT	58.63	22	104	39	142	GGCATCAAGTTTGGCAATTGC	59.534	21	TGTTGGATTTTTCCCACTGTGT	58.63	22	105	38	142	TGGCATCAAGTTTGGCAATTG	58.231	21	TGTTGGATTTTTCCCACTGTGT	58.63	22	106	37	142
scaf_0001166_5	p3	(ATT)6	18	151	168	TTGAGCTGAACACAACCAGA	57.292	20	TTTTCCAAAAGTGGGTGGCC	59.166	20	163	90	252	TGAGCTGAACACAACCAGAT	57.063	20	TTTTCCAAAAGTGGGTGGCC	59.166	20	162	91	252	TGAGCTGAACACAACCAGATT	57.787	21	TTTTCCAAAAGTGGGTGGCC	59.166	20	162	91	252
scaf_0001166_12	p3	(AAT)10	30	151	180	AGTCGTTCCTGCATGTCTCA	59.031	20	AGCTGCATCTCTTCCCAAGT	59.01	20	239	87	325	AGTCGTTCCTGCATGTCTCA	59.031	20	CGAAAGCTGCATCTCTTCCC	58.987	20	243	87	329	TGTGCATGTTACCACTTCGG	58.482	20	AGCTGCATCTCTTCCCAAGT	59.01	20	203	123	325
scaf_0001173_2	p3	(CAT)9	27	151	177	ACATTCATAAGCCCTAACCCTG	57.83	22	GGGAGTTTTTGCCCGAAATT	57.168	20	250	9	258	ACATTCATAAGCCCTAACCCTGA	59.214	23	GGGAGTTTTTGCCCGAAATT	57.168	20	250	9	258	TCATAAGCCCTAACCCTGAATCT	58.693	23	GGGAGTTTTTGCCCGAAATT	57.168	20	246	13	258
scaf_0001173_10	p4	(TATT)5	20	151	170	TGTAAGCTGGTGTGCCAAAC	58.971	20	CCAAGAGGGGGTTGAATTGAG	58.55	21	180	54	233	GGGAGTGGATGTAAGCTGGT	59.088	20	CCAAGAGGGGGTTGAATTGAG	58.55	21	189	45	233	TGGGGAGTGGATGTAAGCTG	59.088	20	CCAAGAGGGGGTTGAATTGAG	58.55	21	191	43	233
scaf_0001176_4	p3	(TTA)15	45	151	195	GCGTGATTGGGTTTGGTCTT	59.041	20	ACATAAGGATCGGGTCTTAACC	57.316	22	233	20	252	TTTTGGGCTAGCGTGATTGG	58.827	20	ACATAAGGATCGGGTCTTAACC	57.316	22	243	10	252	TTCTGTTTTGGGCTAGCGTG	58.765	20	ACATAAGGATCGGGTCTTAACC	57.316	22	248	5	252
scaf_0001177_5	p3	(ACA)5	15	151	165	TGGTCTTTCCACAACAACAACA	58.842	22	TGCCATGTGAGTAAATGATGGAG	58.798	23	120	140	259	TGGTCTTTCCACAACAACAACA	58.842	22	TGCCATGTGAGTAAATGATGGA	57.766	22	120	140	259	TCATCCACACAATCCTCCATTG	58.376	22	TGTTGTTGTTGTGGAAAGACC	57.141	21	158	4	161
scaf_0001179_10	p4	(AAAT)5	20	151	170	CAGAGTGTTCTAGCAATCGAAGT	58.51	23	TGTGCCAAAAACCACTGTGT	58.739	20	131	110	240	CAGAGTGTTCTAGCAATCGAAGT	58.51	23	TGTGTGCCAAAAACCACTGT	58.739	20	133	110	242	ACAGAGTGTTCTAGCAATCGAAG	58.51	23	TGTGCCAAAAACCACTGTGT	58.739	20	132	109	240
scaf_0001183_7	p3	(TTC)5	15	295	309	CCATCAAGGCGCATAAAGCA	59.26	20	TTAAATCCCCTCTAGCCGCA	58.497	20	144	48	191	AGGAGTACGACTTGTGCACT	58.671	20	TTAAATCCCCTCTAGCCGCA	58.497	20	103	89	191	CCCCATCAAGGCGCATAAAG	59.33	20	TTAAATCCCCTCTAGCCGCA	58.497	20	146	46	191
scaf_0001183_8	p3	(TTC)5	15	151	165	TGCGGCTAGAGGGGATTTAA	58.497	20	AGAAGGAGAAGAAGATGGAGGA	57.655	22	162	28	189	ATGCGGCTAGAGGGGATTTA	58.27	20	AGAAGGAGAAGAAGATGGAGGA	57.655	22	163	27	189	TGCGGCTAGAGGGGATTTAA	58.497	20	GCACTAGAAGGAGAAGAAGATGG	58.308	23	167	28	194
scaf_0001184_7	p3	(TGG)5	15	151	165	ATCCACCACCAATCTCACCA	58.629	20	ACACTACCATCATGCCACCA	59.009	20	187	18	204	ATCCACCACCAATCTCACCA	58.629	20	CACCGTCAGCAACACACTAC	59.141	20	200	18	217	ATCCACCACCAATCTCACCA	58.629	20	ATGCCACCACCTCTACATCC	59.16	20	176	18	193
scaf_0001184_9	p4	(TTTA)5	20	151	170	TCCTTGTGTCAGAATTGGTGA	57.145	21	TCTCTTGCACAAAAGCTCGT	58.046	20	260	5	264	TCCTTGTGTCAGAATTGGTGAA	57.837	22	TCTCTTGCACAAAAGCTCGT	58.046	20	260	5	264	TCCTTGTGTCAGAATTGGTGA	57.145	21	TTCTCTTGCACAAAAGCTCGT	58.711	21	261	5	265
scaf_0001184_14	p4	(TTAA)6	24	151	174	TGGTCTTTCTCCAACGTGGT	59.165	20	ACCACCCTCTCCAAAACGAA	59.159	20	188	68	255	TGGTCTTTCTCCAACGTGGT	59.165	20	TACCACCCTCTCCAAAACGA	58.28	20	189	68	256	TGGTCTTTCTCCAACGTGGT	59.165	20	ACAAGCATCCCACACACAAA	58.226	20	130	68	197
scaf_0001185_6	p3	(AGA)6	18	151	168	TGTGGGAATAGGGAAGCAGG	59.081	20	ACGAGAGGCACTTGAAACCT	59.241	20	129	67	195	GGGAAGCAGGGATGACATCT	59.157	20	ACGAGAGGCACTTGAAACCT	59.241	20	119	77	195	AGGGAAGCAGGGATGACATC	59.157	20	ACGAGAGGCACTTGAAACCT	59.241	20	120	76	195
scaf_0001189_11	p3	(GAA)5	15	151	165	AGGGAGAATCGTGGAAGTGG	59.095	20	AGCTCTTGTGATGGTTTTCAGA	57.909	22	189	96	284	AGGGAGAATCGTGGAAGTGG	59.095	20	GTGATGGTTTTCAGATGCAACAG	58.768	23	182	96	277	AGGGAGAATCGTGGAAGTGG	59.095	20	GTGATGGTTTTCAGATGCAACA	57.758	22	182	96	277
scaf_0001190_20	p3	(TTA)5	15	151	165	GGCCACCTAAGTAGTTCCCA	58.718	20	GAGAGGTGTTGAGGGAGAGG	58.809	20	246	5	250	TGGCCACCTAAGTAGTTCCC	58.718	20	GAGAGGTGTTGAGGGAGAGG	58.809	20	247	4	250	GGCCACCTAAGTAGTTCCCA	58.718	20	AGGTGTTGAGGGAGAGGGTA	59.209	20	243	5	247
scaf_0001194_17	p3	(CTT)5	15	151	165	AGGGCAAGAGAAATTGGGGA	58.916	20	TCGGAGACAGAGAAGGAGGA	59.007	20	203	51	253	ACTCTGAGCTGCGATTAGGG	59.25	20	TCGGAGACAGAGAAGGAGGA	59.007	20	219	35	253	TCCAAACTCTGAGCTGCGAT	59.39	20	TCGGAGACAGAGAAGGAGGA	59.007	20	224	30	253
scaf_0001194_18	p3	(CTT)5	15	3	17	TCTTCTTCTTCTTCGCTGCTC	58.047	21	TCGGAGACAGAGAAGGAGGA	59.007	20	102	4	105	CTTCTTCTTCTTCGCTGCTCT	58.042	21	TCGGAGACAGAGAAGGAGGA	59.007	20	101	5	105	TGCTTCTTCTTCTTCTTCGCTG	58.937	22	TCGGAGACAGAGAAGGAGGA	59.007	20	106	0	105
scaf_0001194_18	p4	(TATT)6	24	151	174	TCTTCTTCTTCTTCGCTGCTC	58.047	21	TCGGAGACAGAGAAGGAGGA	59.007	20	102	4	105	CTTCTTCTTCTTCGCTGCTCT	58.042	21	TCGGAGACAGAGAAGGAGGA	59.007	20	101	5	105	TGCTTCTTCTTCTTCTTCGCTG	58.937	22	TCGGAGACAGAGAAGGAGGA	59.007	20	106	0	105
scaf_0001195_2	p3	(TCT)5	15	151	165	TAGACCTGGCTTCCTCTCCT	58.988	20	GCTAGTCGCGAAGAGGTTTG	59.007	20	254	45	298	CCTGGCTTCCTCTCCTTCAA	59.013	20	GCTAGTCGCGAAGAGGTTTG	59.007	20	250	49	298	TTTGCCTTCTTCAACACGGG	58.971	20	GCTAGTCGCGAAGAGGTTTG	59.007	20	201	98	298
scaf_0001195_8	p4	(TTAT)5	20	151	170	TTGTCCAAAAGTGGTGCCAC	59.179	20	GCAATACACAGACAAGGCCC	59.189	20	198	57	254	TTGTCCAAAAGTGGTGCCAC	59.179	20	GGCAATACACAGACAAGGCC	59.189	20	199	57	255	TTGTCCAAAAGTGGTGCCAC	59.179	20	ACAGACAAGGCCCAGAACAT	59.226	20	191	57	247
scaf_0001195_9	p3	(TTG)6	18	151	168	TTTTCCCCCAATCACGAGTG	58.096	20	ATGCACACACAAGCCCAAAA	59.171	20	239	58	296	TTTTCCCCCAATCACGAGTG	58.096	20	CATATGCACACACAAGCCCA	58.824	20	242	58	299	TTTCCCCCAATCACGAGTGG	59.962	20	ATGCACACACAAGCCCAAAA	59.171	20	238	59	296
scaf_0001195_11	p3	(CAT)5	15	151	165	TCCTCCTCCCACAATTAACCA	58.362	21	TACACAGGCAAGGTTCGGAT	59.019	20	226	30	255	TCCTCCTCCCACAATTAACCA	58.362	21	TTACACAGGCAAGGTTCGGA	59.24	20	227	30	256	TCCTCCTCCCACAATTAACCA	58.362	21	CACAGGCAAGGTTCGGATTT	58.752	20	224	30	253
scaf_0001196_8	p4	(TTTA)5	20	151	170	TGGAGACAAGAAGAGCACCT	58.278	20	TGATCCCCAACCTAATTGCAC	58.266	21	107	104	210	TGGAGACAAGAAGAGCACCT	58.278	20	GATCCCCAACCTAATTGCACT	57.982	21	106	104	209	TGGAGACAAGAAGAGCACCT	58.278	20	CCCAACCTAATTGCACTATGGG	59.042	22	102	104	205
scaf_0001196_13	p3	(GTG)5	15	151	165	ATGATGGTGGTGGCAGTAGT	58.711	20	TCACCAACATCACCACTCGA	58.955	20	107	132	238	AAGATGATGGTGGTGGCAGT	59.299	20	TCACCAACATCACCACTCGA	58.955	20	110	129	238	ATGATGGTGGTGGCAGTAGT	58.711	20	CCAACATCACCACTCGAACC	58.843	20	104	132	235
scaf_0001196_14	p3	(GTG)5	15	23	37	TCGAGTGGTGATGTTGGTGA	58.955	20	TGGCGGTAATGGAGTTCAGT	59.019	20	202	91	292	TCGAGTGGTGATGTTGGTGA	58.955	20	CAGTGGTGGTGAAGTTGGTG	58.976	20	186	91	276	TCGAGTGGTGATGTTGGTGA	58.955	20	GGTGGTGAAGTTGGTGGTTC	58.97	20	182	91	272
scaf_0001196_15	p3	(ACC)5	15	151	165	CCATGGGCATCAACATCACC	59.252	20	TCTAGGTGGTAACGGAGCTG	58.529	20	175	12	186	CCACCATGGGCATCAACATC	59.252	20	TCTAGGTGGTAACGGAGCTG	58.529	20	178	9	186	CCATGGGCATCAACATCACC	59.252	20	CTGGTGGTGGTGGTGGTAAT	59.596	20	155	12	166
scaf_0001197_3	p3	(GTG)6	18	151	168	GGAGGCTAATGTGGTGGAGT	59.088	20	CACCACCACCACCACTACTA	58.656	20	127	38	164	TGGAGGCTAATGTGGTGGAG	59.088	20	CACCACCACCACCACTACTA	58.656	20	128	37	164	ATGTGGTGGAGTTGCGATTG	58.832	20	CACCACCACCACCACTACTA	58.656	20	119	46	164
scaf_0001206_20	p3	(GAT)6	18	151	168	GCTTCACCAACCTGAATGCA	59.039	20	GATCACACCGGAGCATTTCC	58.983	20	106	206	311	TGCTTCACCAACCTGAATGC	59.039	20	GATCACACCGGAGCATTTCC	58.983	20	107	205	311	GCGTTCACAGGTTGGAGAAA	58.695	20	GATCACACCGGAGCATTTCC	58.983	20	243	69	311
scaf_0001213_4	p3	(TTA)14	42	151	192	AATCACCAAAGACGCTGCAG	59.123	20	CTTCTCATACCCATGGCGAC	58.129	20	110	222	331	AATCACCAAAGACGCTGCAG	59.123	20	GCTTCTCATACCCATGGCGA	59.893	20	111	222	332	AATCACCAAAGACGCTGCAG	59.123	20	TTGCTTCTCATACCCATGGC	57.943	20	113	222	334
scaf_0001214_3	p3	(AGT)5	15	151	165	GCCTGTGACTCTTTGCAACA	58.976	20	ATCTTCCAGCTGCTCTTCCT	58.418	20	210	5	214	GCCTGTGACTCTTTGCAACA	58.976	20	AGTCTCTTCCTCGTCAAGCA	58.378	20	189	5	193	GCCTGTGACTCTTTGCAACA	58.976	20	TGGCACTCTAGGCTAGGTCA	59.665	20	130	5	134
scaf_0001216_6	p3	(TAT)5	15	151	165	CTTTGGTCCTGTCCCTCCTT	58.932	20	ATTTTGCGCTAAAGCCTCGT	58.835	20	181	75	255	GGTCCTGTCCCTCCTTATGG	58.868	20	ATTTTGCGCTAAAGCCTCGT	58.835	20	177	79	255	AACTTTGGTCCTGTCCCTCC	59.228	20	ATTTTGCGCTAAAGCCTCGT	58.835	20	183	73	255
scaf_0001216_20	p3	(ACA)7	21	151	171	CAAACGCCGAGAGAGACAAC	59.215	20	GGAGGTGGAGGGTAAACGAG	59.464	20	169	135	303	CAAACGCCGAGAGAGACAAC	59.215	20	GAGGAGGTGGAGGGTAAACG	59.464	20	171	135	305	CAAACGCCGAGAGAGACAAC	59.215	20	GCCTCTTGGGATTCTCTCCT	58.494	20	131	135	265
scaf_0001220_1	p3	(TCT)5	15	151	165	TCTTCAGCATCATCACCATCA	57.082	21	TGCTCTGCCTGAATCTAGCT	58.506	20	103	162	264	TCTTCTTCAGCATCATCACCA	57.013	21	TGCTCTGCCTGAATCTAGCT	58.506	20	106	159	264	CTTCTTCAGCATCATCACCATCA	58.803	23	TGCTCTGCCTGAATCTAGCT	58.506	20	105	160	264
scaf_0001220_8	p4	(TAGA)5	20	151	170	TGGGAGAGTATTTTTGGGATGTG	58.401	23	GGAGGAGCAAGGCTTCACTT	59.963	20	227	76	302	GGGAGAGTATTTTTGGGATGTGT	58.4	23	GGAGGAGCAAGGCTTCACTT	59.963	20	226	77	302	TGGGAGAGTATTTTTGGGATGTG	58.401	23	TCATCACAGGCGATGGGAG	59.175	19	242	76	317
scaf_0001222_13	p3	(TTA)23	69	151	219	GGCAAGTCGGAAACTTTCGA	58.777	20	GGCATTGACGCAAGGTCTTA	58.551	20	280	5	284	GGCAAGTCGGAAACTTTCGA	58.777	20	GGCATTGACGCAAGGTCTTAT	58.983	21	280	5	284	GGCAAGTCGGAAACTTTCGA	58.777	20	GGCATTGACGCAAGGTCTT	58.743	19	280	5	284
scaf_0001223_7	p3	(CTC)5	15	151	165	ATGGAAATACCCGTGGCTGA	59.084	20	CCAATGCTCTTCTTTCCGCA	58.832	20	157	98	254	ATGGAAATACCCGTGGCTGA	59.084	20	TGCCAATGCTCTTCTTTCCG	58.832	20	159	98	256	ATGGAAATACCCGTGGCTGA	59.084	20	ATGCTCTTCTTTCCGCAAGC	59.193	20	154	98	251
scaf_0001225_20	p4	(AAAT)5	20	151	170	GACTTATAGCCCCAGTGCCT	58.868	20	CCCCATCTTCTTGTGTATCCC	57.785	21	196	60	255	AGACTTATAGCCCCAGTGCC	58.868	20	CCCCATCTTCTTGTGTATCCC	57.785	21	197	59	255	GACTTATAGCCCCAGTGCCT	58.868	20	ACAAACCCCATCTTCTTGTGT	57.687	21	201	60	260
scaf_0001228_5	p3	(TGC)5	15	151	165	TTGGGAGAGGATGGTGATCG	58.877	20	GGAATCACGGAAAACCCAGG	58.826	20	193	40	232	TTGGGAGAGGATGGTGATCG	58.877	20	GGGAATCACGGAAAACCCAG	58.826	20	194	40	233	TTGGGAGAGGATGGTGATCG	58.877	20	CCAGGAATGAGAGTACGGCA	59.176	20	178	40	217
scaf_0001229_2	p3	(AAT)5	15	151	165	GGACCAAAAGGTCTTCAATCCA	58.504	22	AGAGCTATTGATGGCGCAAC	58.697	20	105	183	287	TGGACCAAAAGGTCTTCAATCC	58.504	22	AGAGCTATTGATGGCGCAAC	58.697	20	106	182	287	GGACCAAAAGGTCTTCAATCCA	58.504	22	CTATTGATGGCGCAACCCTT	58.607	20	101	183	283
scaf_0001229_3	p3	(ATC)5	15	151	165	CACTATGGTTTCCACTGCTGG	58.913	21	CTCTGTGCATCATTCGGTGG	58.988	20	137	176	312	CACTATGGTTTCCACTGCTGG	58.913	21	ATCATTCGGTGGCTGACTCA	59.095	20	129	176	304	TGTTGTTGTTGCTGTTGCTCT	59.182	21	CTCTGTGCATCATTCGGTGG	58.988	20	110	203	312
scaf_0001229_7	p3	(AAT)5	15	151	165	CCCTAACAATTGTCAGTGTTCGA	58.938	23	GTGTGTGCACCGATAATAAATGG	58.403	23	115	16	130	TCCCTAACAATTGTCAGTGTTCG	58.938	23	GTGTGTGCACCGATAATAAATGG	58.403	23	116	15	130	CCCTAACAATTGTCAGTGTTCGA	58.938	23	TGTGTGCACCGATAATAAATGG	57.108	22	114	16	129
scaf_0001230_2	p3	(TAT)5	15	151	165	TTCTTGGGTCATGCTTGCTG	58.75	20	GCAAGTGCACTACTCAGAGC	58.925	20	115	80	194	ATGCTTGCTGTGGCTCTGTA	59.674	20	GCAAGTGCACTACTCAGAGC	58.925	20	105	90	194	TCGTCGTGTGTTTGGAGGTA	58.969	20	TATTTGACCATGCCACGACC	58.255	20	174	132	305
scaf_0001230_13	p4	(TTTA)5	20	151	170	GCGAGTTCGTGACTTACCAC	58.942	20	GAGCCTAATCACAGAGGGGT	58.498	20	126	23	148	GTGCGAGTTCGTGACTTACC	58.942	20	GAGCCTAATCACAGAGGGGT	58.498	20	128	21	148	TTGAATCTTCGCCTGTGTGC	59.126	20	GAGCCTAATCACAGAGGGGT	58.498	20	144	5	148
scaf_0001231_14	p3	(CGG)5	15	151	165	TTAGACCCATACCCACACCC	58.413	20	CCCAAGTTTTGTAGGAGGAGG	57.927	21	123	103	225	TTAGACCCATACCCACACCC	58.413	20	CCCAAGTTTTGTAGGAGGAGGA	59.357	22	123	103	225	TTAGACCCATACCCACACCC	58.413	20	AGGAGGAGGAGTTATGGACAA	57.508	21	111	103	213
scaf_0001232_2	p3	(TTA)6	18	1	18	AGAGAAGGAGAGCAGAGAGAGA	59.154	22	AGCCTTGTTTGGTTTGTCTCT	57.982	21	157	83	239	GAGAAGGAGAGCAGAGAGAGA	57.718	21	AGCCTTGTTTGGTTTGTCTCT	57.982	21	156	84	239	AGAGAAGGAGAGCAGAGAGAG	57.712	21	AGCCTTGTTTGGTTTGTCTCT	57.982	21	157	83	239
scaf_0001232_8	p4	(ATAA)6	24	151	174	ACACGTAAGGATGTGAGTTCAA	57.669	22	CGTCCATCCGGTGTTGAAAA	58.769	20	190	9	198	ACACGTAAGGATGTGAGTTCAA	57.669	22	TCTTTTTGAGGGTAGGGGGC	59.298	20	142	9	150	ACACGTAAGGATGTGAGTTCAA	57.669	22	GTAGGGGGCAGGGGTTAATC	59.523	20	131	9	139
scaf_0001232_9	p4	(ATAA)6	24	6	29	GACGAGATCCATTTGTGGCC	58.983	20	TGAAAGGGTCTGGTCATCCG	59.387	20	228	50	277	TTTTCAACACCGGATGGACG	58.769	20	TGAAAGGGTCTGGTCATCCG	59.387	20	244	34	277	CGAGATCCATTTGTGGCCAA	58.537	20	TGAAAGGGTCTGGTCATCCG	59.387	20	226	52	277
scaf_0001233_8	p3	(ACA)6	18	151	168	ATTGGCTTGCCCCAACATTT	58.934	20	TGTGAACCCCTCAATCCCAA	58.846	20	131	183	313	AATTGGCTTGCCCCAACATT	58.934	20	TGTGAACCCCTCAATCCCAA	58.846	20	132	182	313	TGGCTTGCCCCAACATTTTT	59.157	20	TGTGAACCCCTCAATCCCAA	58.846	20	129	185	313
scaf_0001234_1	p3	(AAT)7	21	151	171	CGGAGGCTTCACATAACCCA	59.748	20	ATTGGGTGGGTTAGGTGAGG	59	20	101	37	137	CCGGAGGCTTCACATAACCC	60.464	20	ATTGGGTGGGTTAGGTGAGG	59	20	102	36	137	GGAGGCTTCACATAACCCAT	57.263	20	ATTGGGTGGGTTAGGTGAGG	59	20	100	38	137
scaf_0001235_10	p3	(GTG)7	21	151	171	ATGATGATGGTGGTGGTGGT	58.998	20	GCCATTGCCACCACTACTAC	58.62	20	175	104	278	GTGGTGGTGGTGGTGTAGTA	58.95	20	GCCATTGCCACCACTACTAC	58.62	20	123	156	278	ATGATGATGGTGGTGGTGGT	58.998	20	ACCACTACTACCACTACCGC	58.532	20	166	104	269
scaf_0001235_23	p3	(TTC)6	18	151	168	TTCCTACTTCGTCCTACGCC	58.902	20	CACCACCACTACCATCACCT	59.016	20	226	7	232	TTCCTACTTCGTCCTACGCC	58.902	20	GACCACCACCACTACCATCA	59.019	20	229	7	235	TTCCTACTTCGTCCTACGCC	58.902	20	AACCACCCTTCACAATGTGC	58.96	20	188	7	194
scaf_0001237_13	p3	(TCT)10	30	151	180	CAGCTCCTCTCTTTCTCTCGT	58.908	21	ACGAGAACAGGAAGGAGACTG	59.11	21	145	115	259	ACAGCTCCTCTCTTTCTCTCG	58.908	21	ACGAGAACAGGAAGGAGACTG	59.11	21	146	114	259	CAGCTCCTCTCTTTCTCTCGT	58.908	21	CGAGAACAGGAAGGAGACTGA	58.836	21	144	115	258
scaf_0001239_6	p3	(GGA)6	18	151	168	AAGAATGAGTTGGAAGCGGC	58.831	20	GTCGACTCGGTTTTGACTCG	58.949	20	104	211	314	TAGGGCTTCGACTTCTTCCG	59.184	20	GTCGACTCGGTTTTGACTCG	58.949	20	225	90	314	GGCGACGCGATGATTAAGAA	58.794	20	GTCGACTCGGTTTTGACTCG	58.949	20	119	196	314
scaf_0001239_7	p3	(TGA)7	21	151	171	CCGCTGACAGGTTATTTTCCC	59.257	21	CACTTGGCACTCTTTTGTCCA	58.976	21	104	95	198	CCGCTGACAGGTTATTTTCCC	59.257	21	GCACTTGGCACTCTTTTGTC	57.875	20	105	95	199	CGCTGACAGGTTATTTTCCCA	58.568	21	CACTTGGCACTCTTTTGTCCA	58.976	21	103	96	198
scaf_0001240_5	p3	(ATA)6	18	151	168	TCTGCAGAGAGAAAGGCCAA	58.941	20	ACCAAACCCTTTCCCTCCAA	59.062	20	157	33	189	TCTGCAGAGAGAAAGGCCAA	58.941	20	AACCAAACCCTTTCCCTCCA	59.062	20	158	33	190	TTCTGCAGAGAGAAAGGCCA	58.941	20	ACCAAACCCTTTCCCTCCAA	59.062	20	158	32	189
scaf_0001240_15	p3	(GTG)8	24	151	174	GGTAGTGGTGGTAGCGATGA	58.891	20	CCACCATCACCACCACTACT	59.016	20	106	191	296	GGTAGTGGTGGTAGCGATGA	58.891	20	ACTACCACTACCACCACTGC	59.026	20	128	191	318	GTGGTAGTGGTGGTAGCGAT	59.178	20	CCACCATCACCACCACTACT	59.016	20	108	189	296
scaf_0001240_16	p3	(GTG)5	15	151	165	GGTGGTAGTAGTGGTGGCAT	59.09	20	CACCACCACCACCACTATCA	59.31	20	104	61	164	TGGTGGTGGTAGTAGTGGTG	58.656	20	CACCACCACCACCACTATCA	59.31	20	108	57	164	GTGGTGGTGGTAGTAGTGGT	58.655	20	CACCACCACCACCACTATCA	59.31	20	109	56	164
scaf_0001241_9	p3	(AAT)5	15	151	165	TGAACTCCATCATGCTCGGT	59.095	20	ACGAGCATGGGACCATTAGT	58.796	20	213	46	258	GCCTCTGAACTCCATCATGC	58.693	20	ACGAGCATGGGACCATTAGT	58.796	20	218	41	258	TGAACTCCATCATGCTCGGT	59.095	20	TTAGTGAAAAGCCGTCAGCC	58.481	20	198	46	243
scaf_0001242_15	p3	(TGG)5	15	151	165	GAGGTGGAAGTGGAAGTGGA	58.943	20	GCAAACCTAGCACCATCACC	59.189	20	107	200	306	GAAGTGGAGGTGGAAGTGGA	58.943	20	GCAAACCTAGCACCATCACC	59.189	20	113	194	306	AGTGGAGGTGGAAGTGGAAG	58.94	20	GCAAACCTAGCACCATCACC	59.189	20	111	196	306
scaf_0001246_11	p3	(ATA)17	51	151	201	AGGAGGAAGCAGGAGTAGGA	58.988	20	TGTTTTCCGTATTGTGGTGGA	57.79	21	243	21	263	AGGAGGAAGCAGGAGTAGGA	58.988	20	ACCACCACACATACTTCTCTCA	58.761	22	218	21	238	AGGAGGAAGCAGGAGTAGGA	58.988	20	TGTTTTCCGTATTGTGGTGGAT	58.243	22	243	21	263
scaf_0001248_5	p3	(TAT)6	18	151	168	TGCCAGAGAACAGAGCTTGT	59.239	20	TGCGCAAAGAGAGCCAAAAT	59.039	20	169	31	199	TGCCAGAGAACAGAGCTTGT	59.239	20	ATGCGCAAAGAGAGCCAAAA	59.039	20	170	31	200	TGCCAGAGAACAGAGCTTGT	59.239	20	AATGCGCAAAGAGAGCCAAA	59.039	20	171	31	201
scaf_0001248_19	p3	(TAT)5	15	151	165	GACTTGAGAGAAATGGAGACTCA	57.601	23	GGACCAAAGCCAGACCCTTA	59.303	20	176	112	287	GACTTGAGAGAAATGGAGACTCA	57.601	23	CGATGGAGGACTGGACCAAA	59.387	20	188	112	299	AGACTTGAGAGAAATGGAGACTC	57.341	23	GGACCAAAGCCAGACCCTTA	59.303	20	177	111	287
scaf_0001252_17	p4	(AATT)5	20	151	170	ACCTGTCACCTAAGACAATCAA	57.025	22	ACCAACCTGGACAAGACCAA	59.077	20	122	77	198	ACCTGTCACCTAAGACAATCAA	57.025	22	CCAACCTGGACAAGACCAAG	58.391	20	121	77	197	ACCTGTCACCTAAGACAATCAA	57.025	22	ACACCAACCTGGACAAGACC	59.817	20	124	77	200
scaf_0001253_5	p4	(ATTT)5	20	3	22	TTCTTTCCGCACCAGATCAC	58.192	20	TAAAAGCAGGTGTGGGAGGT	58.854	20	133	169	301	CAGATCACGCACCTGCATAT	58.125	20	TAAAAGCAGGTGTGGGAGGT	58.854	20	121	181	301	ACGCACCTGCATATAAAGCA	57.963	20	TAAAAGCAGGTGTGGGAGGT	58.854	20	115	187	301
scaf_0001254_10	p3	(AAT)5	15	151	165	CCACATTGCCTGGAAAGCTT	59.029	20	GATGGCCATTCAAAAGCCCA	59.096	20	100	10	109	CCACATTGCCTGGAAAGCTT	59.029	20	AGATGGCCATTCAAAAGCCC	58.802	20	101	10	110	GCGTTCCGAACTTAGGTTCC	58.926	20	AACTCATCCAACACGTCCCA	59.238	20	100	202	301
scaf_0001258_16	p3	(TAT)8	24	151	174	GCATGCTGGAGATGATCACC	58.763	20	AGCCAGCTTGTTACCTAAACTG	58.588	22	130	4	133	GCATGCTGGAGATGATCACC	58.763	20	GCCAGCTTGTTACCTAAACTGG	59.512	22	129	4	132	GCATGCTGGAGATGATCACC	58.763	20	AGCCAGCTTGTTACCTAAACT	57.21	21	130	4	133
scaf_0001258_19	p3	(CCA)8	24	151	174	AAAAAGTTACCGACGCCACC	59.053	20	GCTCCGTTTGTTTTGGTGGA	59.258	20	203	103	305	TAACATGACTGCCACCACCA	59.232	20	GCTCCGTTTGTTTTGGTGGA	59.258	20	167	139	305	CACCACCAATACCACACCAC	58.756	20	GCTCCGTTTGTTTTGGTGGA	59.258	20	140	166	305
scaf_0001258_22	p3	(ATT)5	15	151	165	TGCTCACCCCTTCATTCTGA	58.639	20	GTTTGTTAAACACGCTGTGAAG	57.008	22	219	29	247	AAGCTGCTCACCCCTTCATT	59.593	20	GTTTGTTAAACACGCTGTGAAG	57.008	22	223	25	247	TTCTGAGAAGCTGCTCACCC	59.677	20	GTTTGTTAAACACGCTGTGAAG	57.008	22	230	18	247
scaf_0001260_4	p3	(CTT)7	21	151	171	TTTTGTACCCATGGCTTGGC	59.027	20	AGAAGAGGCCTGCTGAGTTT	58.937	20	143	49	191	TGTTGGAATCTTGGCATGGC	59.103	20	TTTTGCTGATGGTGGTGGTG	58.961	20	118	16	133	TGTTGGAATCTTGGCATGGC	59.103	20	AGAAGAGGCCTGCTGAGTTT	58.937	20	176	16	191
scaf_0001261_3	p3	(TAA)5	15	151	165	AACCACGCTTCAGTTTCTGC	59.337	20	GGCATGCACACCTGCTAAAA	59.397	20	247	52	298	CGCTTCAGTTTCTGCGTTTG	58.611	20	GGCATGCACACCTGCTAAAA	59.397	20	242	57	298	AACCACGCTTCAGTTTCTGC	59.337	20	ATACTTGGGCATGCACACCT	59.667	20	254	52	305
scaf_0001261_4	p3	(AAG)16	48	151	198	AACCACCTGATCTTGGACCC	59.301	20	TGTTGCGTGTTTCTTGCTGA	58.909	20	110	28	137	CCTGGGTTCATCACTTGTGG	58.462	20	TGTTGCGTGTTTCTTGCTGA	58.909	20	135	3	137	CACCTGATCTTGGACCCTGG	59.746	20	TGTTGCGTGTTTCTTGCTGA	58.909	20	107	31	137
scaf_0001261_11	p3	(CAG)5	15	151	165	CATCCCTTATGTGCACAGCC	58.973	20	AGATCGCATGCCAGTCAAAC	58.91	20	201	111	311	CATCCCTTATGTGCACAGCC	58.973	20	AGCATGGGTTGATGTTGCTG	59.107	20	128	111	238	CATCCCTTATGTGCACAGCC	58.973	20	TGATGTTGCTGGTAGCGTTG	58.844	20	119	111	229
scaf_0001265_3	p3	(GAT)5	15	151	165	AAATGTGGTTGCGTTGTGGT	59.179	20	AACTCCAACTCCACCACCAT	58.851	20	175	8	182	AAATGTGGTTGCGTTGTGGT	59.179	20	ACTCCAACTCCAACTCCACC	59.234	20	180	8	187	AAATGTGGTTGCGTTGTGGT	59.179	20	CTCCAACTCCAACTCCACCA	59.235	20	179	8	186
scaf_0001266_3	p3	(CTT)12	36	151	186	GGACCAAACAGGCTTCAAGG	59.038	20	TCTATGGCCCCTGATTCTTCT	57.934	21	238	22	259	TGAGCGTGCTACTTTTGCAA	58.696	20	TCTATGGCCCCTGATTCTTCT	57.934	21	217	43	259	TTGAGCGTGCTACTTTTGCA	58.696	20	TCTATGGCCCCTGATTCTTCT	57.934	21	218	42	259
scaf_0001266_14	p3	(ATA)5	15	151	165	CTATTTGAGTGACGTGGCCG	59.001	20	ATAAAGTGGTTGCCCCGAGA	59.011	20	193	55	247	CTGTGTTTTGCCCTGGCTAG	59.116	20	ATAAAGTGGTTGCCCCGAGA	59.011	20	248	0	247	CTATTTGAGTGACGTGGCCG	59.001	20	ACCTGACCTTTGGCACAGTA	58.863	20	214	55	268
scaf_0001267_9	p3	(ATT)9	27	151	177	TGCATGTTTCTCTTGAGTGCA	58.426	21	AGGGGAAGGTATGCATACAGA	57.94	21	144	74	217	TGCATGTTTCTCTTGAGTGCA	58.426	21	GGGGAAGGTATGCATACAGAC	57.873	21	143	74	216	GCAGGTGAAATATTTGCCGC	58.44	20	AGACAAAGTAGTAGGGGAAGGT	57.857	22	103	127	229
scaf_0001270_19	p3	(ACA)5	15	151	165	GGGGTGGTCAATTTAAGCCG	59.185	20	ATGTGAACCCTTCATCCCCC	59.369	20	170	102	271	GCGATTAACAAGTGGGGTGG	59.191	20	ATGTGAACCCTTCATCCCCC	59.369	20	183	89	271	CCACATGATGTTCACTGCGA	58.558	20	ATGTGAACCCTTCATCCCCC	59.369	20	199	73	271
scaf_0001275_2	p3	(CCA)9	27	151	177	GATCATGGAGATGGCGGAGA	59.028	20	ATCGGGTCAATTCCCCCTTT	58.992	20	201	89	289	ACCTCCGCACGGTTAGATAG	58.97	20	ATCGGGTCAATTCCCCCTTT	58.992	20	233	57	289	CTACCTCCGCACGGTTAGAT	58.97	20	ATCGGGTCAATTCCCCCTTT	58.992	20	235	55	289
scaf_0001277_5	p4	(AAAT)5	20	151	170	CACCAACTGGAGCTTGGAAC	59.046	20	TGGATCGGCGAAGAAAATCT	57.309	20	107	39	145	ACCAACTGGAGCTTGGAACT	59.153	20	TGGATCGGCGAAGAAAATCT	57.309	20	106	40	145	TCACCAACTGGAGCTTGGAA	59.157	20	TGGATCGGCGAAGAAAATCT	57.309	20	108	38	145
scaf_0001280_4	p4	(GTAT)7	28	151	178	GCACGAAGCGTTACAGAGAA	58.585	20	TCCTCCGTACAAAAGAGGGG	58.727	20	219	77	295	GCACGAAGCGTTACAGAGAA	58.585	20	CCTCCGTACAAAAGAGGGGG	59.748	20	218	77	294	GCACGAAGCGTTACAGAGAA	58.585	20	AGTTCTCTCCTTCCATTGCCA	59.012	21	180	77	256
scaf_0001281_12	p4	(AAAT)5	20	151	170	TTAGGTTGGCCCAAACTTGC	58.955	20	GGGATCACTAGAGGGAGCAC	58.955	20	190	45	234	TTAGGTTGGCCCAAACTTGC	58.955	20	AGGGATCACTAGAGGGAGCA	59.063	20	191	45	235	CCCAAACTTGCACCACTTCT	58.597	20	GGGATCACTAGAGGGAGCAC	58.955	20	181	54	234
scaf_0001282_2	p4	(TTTA)5	20	151	170	TGAGGCAAGGAGTGTAGAGG	58.438	20	CCACCCTACCTCTGTAGTCC	58.222	20	247	34	280	GAGGCAAGGAGTGTAGAGGT	58.437	20	CCACCCTACCTCTGTAGTCC	58.222	20	246	35	280	AGGCAAGGAGTGTAGAGGTT	57.969	20	CCACCCTACCTCTGTAGTCC	58.222	20	245	36	280
scaf_0001285_12	p3	(AGC)5	15	151	165	TAAACAGAAGCAGCAGCAGC	59.123	20	AGGTTCCGTCACTTTGGCTA	58.947	20	133	142	274	TAAACAGAAGCAGCAGCAGC	59.123	20	TAGGTTCCGTCACTTTGGCT	58.947	20	134	142	275	GCAGCAGCAGCAAAACAATT	58.777	20	AGGTTCCGTCACTTTGGCTA	58.947	20	121	154	274
scaf_0001286_5	p3	(CTA)7	21	151	171	ATCCGCTTGCGCTACTACTA	58.684	20	ACCCAAACCTGGTACCCAAA	59.065	20	103	139	241	TATCCGCTTGCGCTACTACT	58.684	20	ACCCAAACCTGGTACCCAAA	59.065	20	104	138	241	ATCCGCTTGCGCTACTACTA	58.684	20	TTCACGACCCAAACCTGGTA	58.87	20	109	139	247
scaf_0001286_6	p3	(CTA)7	21	14	34	TTATTGTCTGGTTGCGACGC	59.206	20	TTCCCGACAACACAGGAAGA	58.875	20	181	59	239	TTATTGTCTGGTTGCGACGC	59.206	20	CCAGCCACTGTGCTCTATCT	59.171	20	231	59	289	ATCCGCTTGCGCTACTACTA	58.684	20	ACCCAAACCTGGTACCCAAA	59.065	20	103	2	104
scaf_0001286_19	p3	(GAA)7	21	151	171	ACCACCAACTTCATTGCCAC	58.96	20	CTTCTTCGTGTAATGGCCGG	58.993	20	224	53	276	CCAACTTCATTGCCACCGAA	59.042	20	CTTCTTCGTGTAATGGCCGG	58.993	20	220	57	276	ACCACCAACTTCATTGCCAC	58.96	20	GTGTAATGGCCGGTTTTGGT	59.037	20	217	53	269
scaf_0001287_16	p3	(AAT)5	15	151	165	GCCTACCGTCTGCAAAACAA	59.051	20	GAGTGACTTTTTGGGCGGAG	59.125	20	174	114	287	GCCTACCGTCTGCAAAACAA	59.051	20	CATTAGCCGCTCAATCGACC	59.138	20	135	114	248	GCGGCCAATCTCGATTATCC	58.92	20	GAGTGACTTTTTGGGCGGAG	59.125	20	195	93	287
scaf_0001288_3	p3	(CAT)6	18	345	362	GAGCTTGAATTTGGCCCGAA	59.112	20	TGGCTTGTTAGGTGGTTGATG	58.486	21	157	101	257	TTCCGAGCTTGAATTTGGCC	59.112	20	TGGCTTGTTAGGTGGTTGATG	58.486	21	161	97	257	GAGCTTGAATTTGGCCCGAA	59.112	20	GGCTTGTTAGGTGGTTGATGA	58.21	21	156	101	256
scaf_0001288_7	p3	(GGA)7	21	151	171	ACTAGTCTCCCTGTTTGGCC	59.015	20	TGCTTTGATCAGCTCTTCGC	58.918	20	164	56	219	CTAGTCTCCCTGTTTGGCCA	59.016	20	TGCTTTGATCAGCTCTTCGC	58.918	20	163	57	219	ACTAGTCTCCCTGTTTGGCC	59.015	20	CTTTGATGGTGAACGCCGAT	58.913	20	183	56	238
scaf_0001288_8	p3	(ATT)7	21	151	171	TGCTTTCTGACCACTCCCAT	58.933	20	ATTTTTACCTCCTGGCGGGA	59.003	20	112	10	121	TGCTTTCTGACCACTCCCAT	58.933	20	TTTTTACCTCCTGGCGGGAA	59.228	20	111	10	120	TGCTTTCTGACCACTCCCAT	58.933	20	GATTTTTACCTCCTGGCGGG	58.61	20	113	10	122
scaf_0001290_31	p3	(CAA)5	15	151	165	CGAACCGAGTTTCAGCTCAG	58.936	20	TTGTTGCTGCTGCTGATGTT	58.966	20	146	10	155	CGAACCGAGTTTCAGCTCAG	58.936	20	TTGTTGTTGCTGCTGCTGAT	58.966	20	149	10	158	CGAACCGAGTTTCAGCTCAG	58.936	20	TGCTGCTGATGTTGCTCTTC	58.837	20	139	10	148
scaf_0001292_8	p3	(CGG)5	15	151	165	GACAAACCCAACCCAACCTC	58.963	20	GAGTTTGCAACTTGGGGAGG	59.038	20	201	75	275	GACAAACCCAACCCAACCTC	58.963	20	AGCTAAACCCATTGGACCCA	58.919	20	130	75	204	GACAAACCCAACCCAACCTC	58.963	20	GGGCAAAGTGAGCTAAACCC	59.111	20	140	75	214
scaf_0001293_6	p3	(TTA)9	27	151	177	TGGAACAAGTAATGGGGACGA	59.021	21	GCCAAGGAGGTGAACCATTA	57.493	20	212	67	278	TGGAACAAGTAATGGGGACGA	59.021	21	GCCAAGGAGGTGAACCATTAA	58.197	21	212	67	278	TGGAACAAGTAATGGGGACGA	59.021	21	ATACAATACCGCCAAGGAGG	57.069	20	222	67	288
scaf_0001293_12	p3	(AAT)9	27	151	177	ACGACCCTTTTCTTGGTGAC	58.037	20	CCAAGGAAAGAGTGGTTTGGT	58.334	21	211	115	325	ACGACCCTTTTCTTGGTGAC	58.037	20	ACCAAGGAAAGAGTGGTTTGG	58.334	21	212	115	326	CAGACGACCCTTTTCTTGGTG	59.126	21	CCAAGGAAAGAGTGGTTTGGT	58.334	21	214	112	325
scaf_0001294_5	p3	(CAA)5	15	151	165	CTCCGCACGGCTAGATAGAA	59.048	20	TACCAGAGGCTGTCGTGTTT	58.955	20	103	92	194	CTCCGCACGGCTAGATAGAA	59.048	20	CAGAGGCTGTCGTGTTTGTT	58.7	20	100	92	191	CTCCGCACGGCTAGATAGAA	59.048	20	ATTATCTTGCACCACTGGCG	58.617	20	127	92	218
scaf_0001294_9	p4	(TTTA)5	20	151	170	TGCATCCTAGAATGAGCTCCT	58.313	21	GTGTCCTTCGAAGCATAATGGT	58.729	22	107	199	305	TGCATCCTAGAATGAGCTCCT	58.313	21	CATTACAGTGTCCTTCGAAGCA	58.674	22	114	199	312	TGCATCCTAGAATGAGCTCCT	58.313	21	ACATTACAGTGTCCTTCGAAGC	58.673	22	115	199	313
scaf_0001295_12	p3	(TTG)11	33	151	183	TGTTGTTGTTGTTGTCGTCGT	59.201	21	TCTCCTCTCTCCTCTCTCACA	58.443	21	101	169	269	TGTTGTTGTTGTTGTCGTCG	57.488	20	TCTCCTCTCTCCTCTCTCACA	58.443	21	101	169	269	GTTGTTGTTGTTGTCGTCGT	57.486	20	TCTCCTCTCTCCTCTCTCACA	58.443	21	100	170	269
scaf_0001295_19	p3	(ACC)15	45	151	195	TCTCCCAGTTTTACCCCGAC	59.021	20	TTTGGTAGAGGCGGCAAAAC	59.044	20	189	132	320	CCAGCATGAAATCAGCGGAA	58.903	20	TTTGGTAGAGGCGGCAAAAC	59.044	20	126	195	320	GCATGAAATCAGCGGAAGGT	58.902	20	TTTGGTAGAGGCGGCAAAAC	59.044	20	123	198	320
scaf_0001298_5	p3	(AAG)6	18	151	168	CCCACGTCATTTGGTCCTTC	58.835	20	TGGTTCTAGATTTGCTTGCCT	57.56	21	258	19	276	GCCTCTTTGAAAGTCGCCAT	58.831	20	TGGTTCTAGATTTGCTTGCCT	57.56	21	237	40	276	CACGTCATTTGGTCCTTCGG	59.204	20	TGGTTCTAGATTTGCTTGCCT	57.56	21	256	21	276
scaf_0001298_20	p3	(TAT)7	21	151	171	AACAAAGATGGGGAAGCCAC	58.367	20	TGGTTGGGATTGCGGTTTAC	58.751	20	104	192	295	AACAAAGATGGGGAAGCCAC	58.367	20	CATGGTTGGGATTGCGGTTT	59.392	20	106	192	297	AACAAAGATGGGGAAGCCAC	58.367	20	GTTGGGATTGCGGTTTACCC	59.471	20	102	192	293
scaf_0001304_8	p3	(TTA)7	21	151	171	TTCTGTGTCTGATGCCCTGT	58.941	20	TCTCCCTGAAGAAGCTCTCT	57.082	20	256	35	290	CACGTTCTGTGTCTGATGCC	59.207	20	TCTCCCTGAAGAAGCTCTCT	57.082	20	260	31	290	TTCTGTGTCTGATGCCCTGT	58.941	20	GATCTCCCTGAAGAAGCTCTCT	58.7	22	258	35	292
scaf_0001305_14	p3	(CAC)6	18	151	168	ACCCACGTTCTCTTCCCATC	59.386	20	AGGAGGAGGAGGAGAAGGAG	59.066	20	233	62	294	ACCCACGTTCTCTTCCCATC	59.386	20	AGGAGGAGGAGGAGGAGAAG	59.066	20	236	62	297	CCCACGTTCTCTTCCCATCA	59.387	20	AGGAGGAGGAGGAGAAGGAG	59.066	20	232	63	294
scaf_0001305_14	p3	(CTC)10	30	282	311	ACCCACGTTCTCTTCCCATC	59.386	20	AGGAGGAGGAGGAGAAGGAG	59.066	20	233	62	294	ACCCACGTTCTCTTCCCATC	59.386	20	AGGAGGAGGAGGAGGAGAAG	59.066	20	236	62	297	CCCACGTTCTCTTCCCATCA	59.387	20	AGGAGGAGGAGGAGAAGGAG	59.066	20	232	63	294
scaf_0001305_15	p3	(CAC)6	18	20	37	CTTCTCCTCCTCCTCCTCCT	59.066	20	TGTGGTTGTGGTGTTCTTGC	59.186	20	174	147	320	CTCCTTCTCCTCCTCCTCCT	59.066	20	TGTGGTTGTGGTGTTCTTGC	59.186	20	177	144	320	TTCTCCTCCTCCTCCTCCTC	59.069	20	TGTGGTTGTGGTGTTCTTGC	59.186	20	173	148	320
scaf_0001305_15	p3	(CTC)10	30	151	180	CTTCTCCTCCTCCTCCTCCT	59.066	20	TGTGGTTGTGGTGTTCTTGC	59.186	20	174	147	320	CTCCTTCTCCTCCTCCTCCT	59.066	20	TGTGGTTGTGGTGTTCTTGC	59.186	20	177	144	320	TTCTCCTCCTCCTCCTCCTC	59.069	20	TGTGGTTGTGGTGTTCTTGC	59.186	20	173	148	320
scaf_0001309_8	p3	(AAG)5	15	151	165	ACATTCACTCATTGGCTGCA	58.086	20	AGAAGGGATCAACAGACATGGA	58.815	22	243	47	289	AACATTCACTCATTGGCTGCA	58.759	21	AGAAGGGATCAACAGACATGGA	58.815	22	244	46	289	ACATTCACTCATTGGCTGCA	58.086	20	GAAGGGATCAACAGACATGGA	57.366	21	242	47	288
scaf_0001311_4	p4	(AAAT)5	20	151	170	ACCATCTCCCCTAGGCCTAT	58.819	20	GCGGGACCCACTAATGTCAT	59.82	20	113	197	309	ATACCATCTCCCCTAGGCCT	58.819	20	GCGGGACCCACTAATGTCAT	59.82	20	115	195	309	ACCATCTCCCCTAGGCCTAT	58.819	20	CGGGACCCACTAATGTCATG	58.046	20	112	197	308
scaf_0001312_7	p4	(TTTA)5	20	151	170	GGTGTAGCTGTTTGGCACAT	58.752	20	AGGTTCACCTCCACTAAGGC	59.015	20	116	109	224	CAGGTGTAGCTGTTTGGCAC	59.407	20	AGGTTCACCTCCACTAAGGC	59.015	20	118	107	224	TCAGGTGTAGCTGTTTGGCA	59.528	20	AGGTTCACCTCCACTAAGGC	59.015	20	119	106	224
scaf_0001315_1	p3	(ATG)5	15	151	165	GACGACATTTGGAGGAGTGC	58.92	20	TGCATAGGAAGCTCTCTTTCCT	58.889	22	110	79	188	GACGACATTTGGAGGAGTGC	58.92	20	AGGAAGCTCTCTTTCCTCTCA	57.817	21	105	79	183	AAAGCGACGACATTTGGAGG	58.843	20	TGCATAGGAAGCTCTCTTTCCT	58.889	22	115	74	188
scaf_0001315_4	p3	(AAT)11	33	151	183	GGGCCAAATAGATGAGCACA	57.943	20	TCCAAGGCTTCATGTTGATCT	57.273	21	104	10	113	AGATCAACATGAAGCCTTGGA	57.273	21	TGGCCTCAATGGAAAAAGGAC	58.753	21	240	93	332	AGTTTCCTTCCAATTAGGGGG	57.242	21	TGGCCTCAATGGAAAAAGGAC	58.753	21	115	218	332
scaf_0001315_7	p3	(AAT)6	18	151	168	TGACTTAAGAACCTTAGGAACCC	57.506	23	CCCCCTCCTCATTGATCTCC	58.937	20	109	117	225	GACTTAAGAACCTTAGGAACCCT	57.241	23	CCCCCTCCTCATTGATCTCC	58.937	20	108	118	225	GGAAAAGGGTTAGAGAGGAATGA	57.563	23	TGGACTTAGATGGGTAGGGC	58.197	20	116	179	294
scaf_0001316_9	p3	(TTC)5	15	151	165	GATGGCGATGAGTGAGCATG	59.134	20	AGGTGGCGTGAAGAAGAAGA	58.951	20	116	58	173	TAAGACGACATCGAGCAGCA	59.191	20	AGGTGGCGTGAAGAAGAAGA	58.951	20	139	35	173	GTAAGACGACATCGAGCAGC	58.807	20	AGGTGGCGTGAAGAAGAAGA	58.951	20	140	34	173
scaf_0001317_4	p3	(TGG)5	15	151	165	AGCGTTGATAGTGGTAGCGA	58.899	20	TCACCACCACCATCATTCCA	58.929	20	187	13	199	AGCGTTGATAGTGGTAGCGA	58.899	20	TACCACTAGCACTACCGCTG	58.899	20	222	13	234	AGCGTTGATAGTGGTAGCGA	58.899	20	ACTACCACTAGCACTACCGC	58.899	20	224	13	236
scaf_0001317_5	p3	(GGT)5	15	151	165	GTGATGGTGGCATGATGGTG	59.257	20	CCACTATCAACATGCCACCG	58.983	20	130	172	301	TGGTAGTGATGGTGGCATGA	58.716	20	CCACTATCAACATGCCACCG	58.983	20	135	167	301	AGTGGTAGTGATGGTGGCAT	58.711	20	CCACTATCAACATGCCACCG	58.983	20	137	165	301
scaf_0001321_2	p3	(AAT)6	18	151	168	GGGTTAGGATTGCCACCTCT	59.08	20	TCGTGATCCATGGGAGTTGA	58.433	20	233	80	312	GTTCGGGTTAGGATTGCCAC	58.908	20	TCGTGATCCATGGGAGTTGA	58.433	20	237	76	312	AAATTGTGGGCAGGTTTGGG	59.236	20	TCGTGATCCATGGGAGTTGA	58.433	20	260	53	312
scaf_0001322_21	p3	(TCC)5	15	151	165	AACACCACCTTCTCCACCAA	59.077	20	GAGGAGGAGGACATGGCTTT	59.085	20	122	9	130	AACACCACCTTCTCCACCAA	59.077	20	CCTTGCAACACTGGACAACA	58.898	20	279	9	287	AAAGCCATGTCCTCCTCCTC	59.085	20	CCTTGCAACACTGGACAACA	58.898	20	177	111	287
scaf_0001325_3	p3	(TTA)5	15	151	165	AATTGCCCCCATTGAAGGTG	58.721	20	CCAAAGGCATGCGTCTTAGG	59.265	20	259	30	288	AATTGCCCCCATTGAAGGTG	58.721	20	CCCAAAGGCATGCGTCTTAG	59.265	20	260	30	289	AATTGCCCCCATTGAAGGTG	58.721	20	CAACACTCCCCAAAGGCATG	59.395	20	268	30	297
scaf_0001325_10	p4	(TCCT)7	28	151	178	TGATGCTGCAGAGGACTTGA	59.021	20	AGGAAGGAAGGAAGGAGAAGC	59.087	21	149	17	165	TGGTTGTTGTTGATGCTGCA	58.89	20	AGGAAGGAAGGAAGGAGAAGC	59.087	21	159	7	165	TGATGCTGCAGAGGACTTGA	59.021	20	GGAAGGAAGGAGAAGCAGAGA	58.816	21	144	17	160
scaf_0001325_11	p4	(TTTG)6	24	151	174	TCCCCTTTTCCCCCTCATTC	58.992	20	GGGGGTGGAGAAAGAGAGAG	58.8	20	270	2	271	CCCCTTTTCCCCCTCATTCT	58.989	20	GGGGGTGGAGAAAGAGAGAG	58.8	20	269	3	271	TTCCCCTTTTCCCCCTCATT	58.522	20	GGGGGTGGAGAAAGAGAGAG	58.8	20	271	1	271
scaf_0001326_12	p3	(CCT)5	15	282	296	AGAACGGGTTGTCAATTGGC	59.041	20	GGGGTGGCAAGGAAAATCTG	59.102	20	126	28	153	ACGGGTTGTCAATTGGCATC	59.112	20	GGGGTGGCAAGGAAAATCTG	59.102	20	123	31	153	TAACCCCCTCACATCACACC	59.011	20	CTCCCACCCAATCCTCATCA	58.784	20	131	88	218
scaf_0001326_13	p3	(CCT)5	15	151	165	CAGATTTTCCTTGCCACCCC	59.102	20	CATGGATTCGTCGGACATGG	58.779	20	108	3	110	CAGATTTTCCTTGCCACCCC	59.102	20	CCATGGATTCGTCGGACATG	58.779	20	109	3	111	CAGATTTTCCTTGCCACCCC	59.102	20	TCGCGGAATCAGCTTTTTGT	58.765	20	252	3	254
scaf_0001326_14	p3	(GCC)5	15	151	165	TCCAGACCGATGATGCTCAA	58.806	20	AACCTTAGATCTCGTGGCGT	58.816	20	174	54	227	TCCAGACCGATGATGCTCAA	58.806	20	GGGACGATTCAGAGGGAGTT	58.804	20	153	54	206	ACAAAAAGCTGATTCCGCGA	58.765	20	AACCTTAGATCTCGTGGCGT	58.816	20	155	73	227
scaf_0001326_25	p4	(GCTT)8	32	151	182	CTTGCTTGCTTGCTTGCTTG	59.141	20	ACTGTCAAAGCTCTCAGGCT	58.945	20	124	159	282	CTTGCTTGCTTGCTTGCTTG	59.141	20	ACTGTCAAAGCTCTCAGGCT	58.945	20	128	155	282	CTTGCTTGCTTGCTTGCTTG	59.141	20	ACTGTCAAAGCTCTCAGGCT	58.945	20	132	151	282
scaf_0001326_27	p3	(CTT)12	36	151	186	CAAGTTCATGCACACCAGCT	59.043	20	AGACTAAAGTGTCTGCGGCT	59.03	20	118	28	145	CAAGTTCATGCACACCAGCT	59.043	20	GACTAAAGTGTCTGCGGCTG	58.928	20	117	28	144	CAAGTTCATGCACACCAGCT	59.043	20	TTTGAACCCGAAACCCCTCT	59.152	20	267	28	294
scaf_0001327_6	p3	(GAA)6	18	24	41	ATGGGAGCTGGGTTTCATCA	58.998	20	AGAGAGAGAGGGTCGATCGA	58.875	20	266	181	446	ATGGGAGCTGGGTTTCATCA	58.998	20	GAGAGGGTCGATCGATCTCC	58.838	20	261	181	441	GGGAGCTGGGTTTCATCAAC	58.823	20	AGAGAGAGAGGGTCGATCGA	58.875	20	264	183	446
scaf_0001327_9	p3	(ATC)5	15	151	165	AGGAGAGGGACCTTAGACCA	58.605	20	CGGCTAATGGGCTAGCTAGT	59.03	20	229	65	293	AGGAGAGGGACCTTAGACCA	58.605	20	GTCGGCTAATGGGCTAGCTA	59.033	20	231	65	295	AGGAGAGGGACCTTAGACCA	58.605	20	TGTTGTCGGCTAATGGGCTA	59.094	20	235	65	299
scaf_0001328_7	p3	(GCT)5	15	151	165	CCATCTGGATCGGGTTGTTC	58.332	20	CAATGATGCCTGGAGGAAGC	58.97	20	101	6	106	CCATCTGGATCGGGTTGTTC	58.332	20	AATGATGCCTGGAGGAAGCT	59.075	20	100	6	105	CCATCTGGATCGGGTTGTTC	58.332	20	AATCTGCCAATGATGCCTGG	58.59	20	108	6	113
scaf_0001329_1	p4	(AATC)5	20	151	170	TTCCTTAATCAGTGCCTTAGGG	57.496	22	AGGGTTTTGGCTCTGATACCA	59.007	21	128	184	311	TTCCTTAATCAGTGCCTTAGGG	57.496	22	ACGGTTTTAGGGTTTTGGCTC	59.041	21	136	184	319	TTCCTTAATCAGTGCCTTAGGG	57.496	22	ACGGTTTTAGGGTTTTGGCT	57.924	20	136	184	319
scaf_0001329_12	p3	(GAT)6	18	151	168	TGTGGGTGTCTTTTGCCCTA	59.153	20	GGTGCTGCAAACTGTGATGA	59.046	20	205	108	312	TTGTGTGGGTGTCTTTTGCC	59.179	20	GGTGCTGCAAACTGTGATGA	59.046	20	208	105	312	GTGGGTGTCTTTTGCCCTAA	58.01	20	GGTGCTGCAAACTGTGATGA	59.046	20	204	109	312
scaf_0001331_14	p3	(TGT)10	30	151	180	AAGGCCTGAAGCACTTTTGG	58.957	20	TCCTGAGCACCCACAAGATT	58.933	20	177	24	200	AAGGCCTGAAGCACTTTTGG	58.957	20	TTCCTGAGCACCCACAAGAT	58.933	20	178	24	201	AAGGCCTGAAGCACTTTTGG	58.957	20	TTTCCTGAGCACCCACAAGA	59.157	20	179	24	202
scaf_0001331_19	p3	(TGT)7	21	151	171	GTTGATCTTGTGGGTGCTCG	59.201	20	TGCCTTCGAGCAATTCTATGC	59.057	21	148	169	316	TGTGGGTGCTCGGGAAATAA	59.306	20	TGCCTTCGAGCAATTCTATGC	59.057	21	140	177	316	TTGTGGGTGCTCGGGAAATA	59.306	20	TGCCTTCGAGCAATTCTATGC	59.057	21	141	176	316
scaf_0001333_6	p3	(TTA)10	30	151	180	TGGGGTGTCACATTTCTCCT	58.555	20	ACGTGGGAAGTGGAAAGTCA	59.165	20	114	215	328	GGGGTGTCACATTTCTCCTC	57.885	20	ACGTGGGAAGTGGAAAGTCA	59.165	20	113	216	328	TTGGGGTGTCACATTTCTCCT	59.22	21	ACGTGGGAAGTGGAAAGTCA	59.165	20	115	214	328
scaf_0001333_10	p3	(TAT)6	18	151	168	GGTGTCACAACATACGAGGC	58.924	20	AGACAGTCACACCAAAGGGA	58.493	20	121	197	317	ACGCTATTACCTTATGGCCCA	58.948	21	GCCTCGTATGTTGTGACACC	58.924	20	196	21	216	GGTGTCACAACATACGAGGC	58.924	20	AGACAGTCACACCAAAGGGAT	58.942	21	121	197	317
scaf_0001334_10	p3	(AGA)7	21	151	171	TACTCTCTCGCAGGCATCAG	58.972	20	GTGTCTGTCGCACGATTTCA	58.863	20	161	114	274	GGAGAAAGTGAAAGGACGGC	58.842	20	CTGATGCCTGCGAGAGAGTA	58.972	20	126	8	133	CGACAGAGAGAGTTTGCAGC	58.933	20	GTGTCTGTCGCACGATTTCA	58.863	20	190	85	274
scaf_0001334_11	p3	(GAA)7	21	1	21	GAATAGTGGATTGCCGAGGC	58.77	20	CTCTCTCTCTCTCTCCGCCT	59.53	20	137	28	164	GAATAGTGGATTGCCGAGGC	58.77	20	TCTCTCTCTCTCTCCGCCTC	59.532	20	136	28	163	GAATAGTGGATTGCCGAGGC	58.77	20	TCTCTCTCTCTCTCTCCGCC	59.532	20	138	28	165
scaf_0001336_2	p3	(AAT)7	21	151	171	TCCAAAAACGCATCAAGGCA	58.964	20	AGAGTTGCGTACGAGAGAGG	58.912	20	197	4	200	TCCAAAAACGCATCAAGGCA	58.964	20	TGGTTTGGCTGGGTTTCCTA	59.146	20	231	4	234	TCCAAAAACGCATCAAGGCA	58.964	20	TTTGGTTTGGCTGGGTTTCC	59.166	20	233	4	236
scaf_0001336_11	p3	(ATA)5	15	151	165	CCCTATTCGAGCGGGTTCAA	59.823	20	TCCACCGAACATGGAGAGTT	58.652	20	121	116	236	CCCTATTCGAGCGGGTTCAA	59.823	20	TTCCACCGAACATGGAGAGT	58.652	20	122	116	237	AGATGAAGGAAGTGACCGGA	58.061	20	TCCACCGAACATGGAGAGTT	58.652	20	204	33	236
scaf_0001336_14	p3	(TGG)12	36	151	186	ATAATGGTGGTGGTGGTGGT	58.919	20	TCGTTGTCATCCACCCATCA	59.02	20	176	146	321	ATAATGGTGGTGGTGGTGGT	58.919	20	CACCATCACCACTGTCGTTG	59.132	20	190	146	335	ATAATGGTGGTGGTGGTGGT	58.919	20	CACTGTCGTTGTCATCCACC	58.852	20	181	146	326
scaf_0001337_3	p3	(GCA)5	15	151	165	GAATGAGAGCAACAGCAGGG	58.907	20	GGTGATTGACGTCATGAGCC	58.99	20	187	88	274	GGAATGAGAGCAACAGCAGG	58.907	20	GGTGATTGACGTCATGAGCC	58.99	20	188	87	274	GAATGAGAGCAACAGCAGGG	58.907	20	GTCCTCAGATCGACCTCCTG	58.971	20	222	88	309
scaf_0001338_2	p3	(TTA)5	15	295	309	AACGGGTGGGTCATGTAGTT	58.938	20	ACAGAATCTCCAGCTGCAGT	59.017	20	113	102	214	GGTCATGTAGTTATGCGGGC	58.773	20	ACAGAATCTCCAGCTGCAGT	59.017	20	105	110	214	CGGTTTGGATGACGGATTGG	59.267	20	ACAGAATCTCCAGCTGCAGT	59.017	20	202	13	214
scaf_0001338_3	p3	(TTA)5	15	151	165	ACTGCAGCTGGAGATTCTGT	59.017	20	GTGGTGTGGGTTTGCAGATT	58.96	20	217	51	267	ACTGCAGCTGGAGATTCTGT	59.017	20	GTTGTGTTGTGGTGTGGGTT	59.108	20	225	51	275	ACTGCAGCTGGAGATTCTGT	59.017	20	TGTGTTGTGGTGTGGGTTTG	59.109	20	223	51	273
scaf_0001342_5	p3	(AAT)7	21	151	171	GGGTCCCAAATGAGTTGCTC	58.823	20	CTTGCAGCCTCTTATGGTGC	59.263	20	102	207	308	GGGTCCCAAATGAGTTGCTC	58.823	20	GCTTGCAGCCTCTTATGGTG	59.263	20	103	207	309	AGGGTCCCAAATGAGTTGCT	59.22	20	CTTGCAGCCTCTTATGGTGC	59.263	20	103	206	308
scaf_0001342_10	p3	(AAT)6	18	151	168	AACCGGACCATGAGATCACA	58.724	20	ACCCCCAATGACCTTATTCATT	57.375	22	159	44	202	ACCGGACCATGAGATCACAT	58.5	20	ACCCCCAATGACCTTATTCATT	57.375	22	158	45	202	AACACCTAGTGTGACACCCA	58.497	20	ACCCCCAATGACCTTATTCATT	57.375	22	131	72	202
scaf_0001344_6	p4	(TTTA)5	20	151	170	GTATGCACTGTGACACTGTCA	58.246	21	AAATGACCTGCCAATGTGGG	58.731	20	216	82	297	GTATGCACTGTGACACTGTCA	58.246	21	GGGCCAGAATTGCATAGCAG	59.328	20	199	82	280	GTATGCACTGTGACACTGTCA	58.246	21	CAATGTGGGCCAGAATTGCA	59.391	20	205	82	286
scaf_0001345_7	p4	(AAAT)5	20	151	170	AAGGACACATAGGGGCATGA	58.405	20	AGCCACATGACGATGCAAAA	58.753	20	265	12	276	AAGGACACATAGGGGCATGA	58.405	20	AAGCCACATGACGATGCAAA	58.753	20	266	12	277	AAGGACACATAGGGGCATGA	58.405	20	AAAGCCACATGACGATGCAA	58.753	20	267	12	278
scaf_0001345_11	p3	(CAT)7	21	151	171	GCCAGTCAGCAGAATCCATC	58.693	20	TGCGGGAGATTTGGCAAATT	58.735	20	139	134	272	GCCAGTCAGCAGAATCCATC	58.693	20	TTGCGGGAGATTTGGCAAAT	58.735	20	140	134	273	GCCAGTCAGCAGAATCCATC	58.693	20	ATTTGCGGGAGATTTGGCAA	58.735	20	142	134	275
scaf_0001348_20	p3	(TTA)6	18	151	168	TGTCGTCCTCACATTGCATC	58.274	20	TGTTGGCGTGGGTTAGGTAA	59.236	20	167	125	291	TGTCGTCCTCACATTGCATC	58.274	20	TTGTTGGCGTGGGTTAGGTA	59.236	20	168	125	292	TGTCGTCCTCACATTGCATC	58.274	20	ATGAGCTTGGTGGTTGTTGG	58.669	20	181	125	305
scaf_0001348_24	p4	(AAAT)5	20	151	170	TCCCAAACGAGGCCTTAGTT	58.938	20	GGACCTCTCTCTAACATCCCC	58.678	21	209	59	267	TTCCCAAACGAGGCCTTAGT	58.938	20	GGACCTCTCTCTAACATCCCC	58.678	21	210	58	267	CCTATTCCCAAACGAGGCCT	59.453	20	GGACCTCTCTCTAACATCCCC	58.678	21	214	54	267
scaf_0001348_35	p3	(ACC)5	15	151	165	ACCTGCCACCATCACCTATC	59.16	20	GTAGGTGGTGAGTGGGTGAC	59.679	20	155	58	212	CCTGCCACCATCACCTATCA	59.161	20	GTAGGTGGTGAGTGGGTGAC	59.679	20	154	59	212	CCTATCACCACCACTCACCA	58.724	20	GTAGGTGGTGAGTGGGTGAC	59.679	20	141	72	212
scaf_0001348_36	p3	(CCA)7	21	151	171	CACCACCCACCACCTACC	59.246	18	GTGGTAATGGTGGGTGGGT	59.228	19	109	10	118	CCACCACCCACCACCTAC	59.246	18	GTGGTAATGGTGGGTGGGT	59.228	19	110	9	118	CACCACCCACCACCTACC	59.246	18	TGGTAATGGTGGGTGGGTG	59.229	19	108	10	117
scaf_0001349_2	p3	(GTG)7	21	151	171	GCGTCCATATCCTAACCCGA	59.036	20	GTCTGGTCTGGCTAGTTGGT	59.023	20	136	126	261	GCGTCCATATCCTAACCCGA	59.036	20	TCTGGTCTGGCTAGTTGGTG	59.023	20	135	126	260	ATCCTAACCCGAACCTGTGG	59.09	20	GTCTGGTCTGGCTAGTTGGT	59.023	20	128	134	261
scaf_0001350_11	p3	(ATG)5	15	151	165	GGGAGTTTGCCCTGAAATGT	58.367	20	ACTCCACCACCATCATCATCA	58.801	21	102	73	174	GGAGTTTGCCCTGAAATGTGA	58.761	21	ACTCCACCACCATCATCATCA	58.801	21	101	74	174	GGGAGTTTGCCCTGAAATGT	58.367	20	CAAGGTGGGAGTGATAATGCA	57.997	21	129	73	201
scaf_0001351_1	p4	(AAAT)7	28	151	178	AGAGAAAAGGAAGGGTCCCA	57.866	20	TGGTGACCTTTTGTTTTGTCCA	58.834	22	100	49	148	AGAGAAAAGGAAGGGTCCCAA	58.571	21	TGGTGACCTTTTGTTTTGTCCA	58.834	22	100	49	148	AGAGAAAAGGAAGGGTCCCA	57.866	20	TGGTGACCTTTTGTTTTGTCC	57.122	21	100	49	148
scaf_0001351_4	p4	(ATTT)5	20	151	170	TGAGAGGTCCGTATTTTGTGAA	57.389	22	TGAACAAAGAGCCAACGAAAG	57.309	21	115	187	301	ATGAGAGGTCCGTATTTTGTGA	57.181	22	TGAACAAAGAGCCAACGAAAG	57.309	21	116	186	301	TGAGAGGTCCGTATTTTGTGAA	57.389	22	TTGAACAAAGAGCCAACGAAAG	57.972	22	116	187	302
scaf_0001352_15	p4	(TTTA)5	20	151	170	CGAGTGGTGCCTCACAATTT	58.762	20	GCCAAGTGTGTATATAAGGCCC	58.853	22	233	46	278	TAACGAGTGGTGCCTCACAA	59.246	20	GCCAAGTGTGTATATAAGGCCC	58.853	22	236	43	278	TTAACGAGTGGTGCCTCACA	59.246	20	GCCAAGTGTGTATATAAGGCCC	58.853	22	237	42	278
scaf_0001355_9	p4	(TGTT)10	40	151	190	ATGGTGTGGGTGGATGGATT	58.99	20	CCATGCAGTAAGTTTCTCAATGC	58.582	23	213	70	282	AATGGTGTGGGTGGATGGAT	58.99	20	CCATGCAGTAAGTTTCTCAATGC	58.582	23	214	69	282	ATGGTGTGGGTGGATGGATT	58.99	20	GCAGTAAGTTTCTCAATGCACA	57.512	22	209	70	278
scaf_0001357_2	p3	(TCT)14	42	151	192	GCGCCTAAGTCTTAATGGCC	59.055	20	ATCTTTGGGGGCTGCAATTC	58.802	20	197	62	258	GCGCCTAAGTCTTAATGGCC	59.055	20	GATCTTTGGGGGCTGCAATT	58.802	20	198	62	259	GGCGCCTAAGTCTTAATGGC	59.055	20	ATCTTTGGGGGCTGCAATTC	58.802	20	198	61	258
scaf_0001358_21	p4	(AAAT)6	24	151	174	TCAGGTTCTAAGGCTTGGGG	59.008	20	GACTCGTATCGTCGGTGACT	58.995	20	172	76	247	TCAGGTTCTAAGGCTTGGGG	59.008	20	AGTGGAAACCAGTGTCGTCA	59.172	20	247	76	322	TCTAAGGCTTGGGGTACACC	58.718	20	GACTCGTATCGTCGGTGACT	58.995	20	166	82	247
scaf_0001360_4	p4	(TCCA)5	20	151	170	ACAACCTTGCGCTCATCATT	58.462	20	TGGATGGATGGATGGATGGA	57.863	20	107	63	169	AACAACCTTGCGCTCATCAT	58.462	20	TGGATGGATGGATGGATGGA	57.863	20	108	62	169	TCCCTCCCAACAATCCTACC	58.408	20	GGATGGAAGATGTACCCACCT	58.872	21	129	28	156
scaf_0001360_6	p4	(ATTG)5	20	151	170	TAAGCTCGAAACGCACCATC	58.644	20	CCCTAAGGCACTGATTAAAGCA	58.38	22	192	43	234	GATAAGCTCGAAACGCACCA	58.644	20	CCCTAAGGCACTGATTAAAGCA	58.38	22	194	41	234	AGATAAGCTCGAAACGCACC	58.358	20	CCCTAAGGCACTGATTAAAGCA	58.38	22	195	40	234
scaf_0001360_7	p3	(TTC)6	18	151	168	GCCCTTCATCGACTTCGTTC	59	20	AGTGTACCCAGGTGAAGTCG	59.033	20	189	3	191	GCCCTTCATCGACTTCGTTC	59	20	GTGTACCCAGGTGAAGTCGA	59.036	20	188	3	190	CGACATTGAAGGGCATACCG	59.063	20	AGTGTACCCAGGTGAAGTCG	59.033	20	144	48	191
scaf_0001360_9	p4	(TGAT)6	24	151	174	GGCGAACAACTTGCAGACAT	59.407	20	CCCCTTAAGTTGGTGCGAAG	58.835	20	106	1	106	ACTTGCAGACATCCTCACCA	58.941	20	AGTCCCCCTTAAGTTGGTGC	59.596	20	102	9	110	GGCGAACAACTTGCAGACAT	59.407	20	AGTCCCCCTTAAGTTGGTGC	59.596	20	110	1	110
scaf_0001360_12	p3	(TAG)9	27	151	177	GCTCGCTTTTGTACTTTTTGGT	58.298	22	AGGACTTCACCTCCCAATCA	57.955	20	253	55	307	AGCTCGCTTTTGTACTTTTTGG	58.035	22	AGGACTTCACCTCCCAATCA	57.955	20	254	54	307	GCTCGCTTTTGTACTTTTTGGT	58.298	22	AGGACTTCACCTCCCAATCAA	58.652	21	253	55	307
scaf_0001360_13	p3	(ACC)8	24	151	174	TCCCTCCTTCGGGCTTTTAA	58.636	20	TGGTTGGGGGTGTTTGGTAT	59.139	20	125	29	153	TCCCTCCTTCGGGCTTTTAA	58.636	20	TTATTGGTGGTGGTGGTGGT	59.146	20	150	29	178	TCCCTCCTTCGGGCTTTTAA	58.636	20	GGTGTTTGGTATTGAGGGGC	58.817	20	117	29	145
scaf_0001363_6	p3	(AAT)5	15	151	165	TGGTGTACTCTTTGTCATGTTCC	58.614	23	TCGTAGGGTCTTCATGCTTACA	58.906	22	169	30	198	TGGTGTACTCTTTGTCATGTTCC	58.614	23	CTCATTCGTAGGGTCTTCATGC	58.873	22	174	30	203	TGGTGTACTCTTTGTCATGTTCC	58.614	23	TCATTCGTAGGGTCTTCATGC	57.821	21	173	30	202
scaf_0001363_13	p3	(TGG)5	15	151	165	CGGTATGGAGGAGGAAGAGG	58.667	20	TCAATCAAGAGCGACGGAGA	58.826	20	164	70	233	CGGTATGGAGGAGGAAGAGG	58.667	20	TGCTATTCTTCGAGGCGTCA	59.185	20	181	70	250	CGGTATGGAGGAGGAAGAGG	58.667	20	ATTTGTCATTGAACCGCCGT	58.756	20	116	70	185
scaf_0001364_2	p3	(AAT)5	15	151	165	TGAGCCAGCTAACGAGTTGA	59.034	20	AAACTCGAATTCGGCTTGGT	58.108	20	175	51	225	TCGAGTTCAAGCTCAAACGC	59.141	20	AAACTCGAATTCGGCTTGGT	58.108	20	100	126	225	TGAGCCAGCTAACGAGTTGA	59.034	20	CAAACTCGAATTCGGCTTGG	57.753	20	176	51	226
scaf_0001365_5	p3	(ATT)6	18	151	168	CGCTTAAGGCCCCGTATTTG	59.339	20	TGATCCAAACCCGTCCCTAA	58.341	20	102	180	281	TGCACAAGCTCAATGGACAT	58.086	20	GGCCATGACCGATCTGTACT	59.247	20	123	132	254	TGCACAAGCTCAATGGACAT	58.086	20	AGGCCATGACCGATCTGTAC	59.247	20	124	132	255
scaf_0001366_3	p3	(ATT)5	15	151	165	TCGCTGCCTGTGAAATTTCT	58.104	20	GGGTTCAAGTGAGAAGCAACA	58.702	21	275	1	275	TCGCTGCCTGTGAAATTTCT	58.104	20	AGGGTTCAAGTGAGAAGCAAC	58.423	21	276	1	276	TCGCTGCCTGTGAAATTTCTC	59.193	21	GGGTTCAAGTGAGAAGCAACA	58.702	21	275	1	275
scaf_0001366_7	p3	(TCC)11	33	2	34	TCCCTTTCTGCCTCTCTTCC	58.72	20	AAAAGGGGAGGGGAGAGAAA	57.85	20	100	54	153	TCCCTTTCTGCCTCTCTTCC	58.72	20	AAAAAGGGGAGGGGAGAGAA	57.85	20	101	54	154	TCTGCCTCTCTTCCCCTTTC	58.72	20	AGGAAGGGAAAGAGACGACT	57.688	20	124	60	183
scaf_0001367_9	p3	(TTA)6	18	151	168	TGTCTCTGACTGTTTGTGGTTG	58.73	22	TTCTAGGAAGCACAGGCACA	58.944	20	133	178	310	GTCTCTGACTGTTTGTGGTTGT	58.729	22	TTCTAGGAAGCACAGGCACA	58.944	20	132	179	310	TGTCTCTGACTGTTTGTGGTTG	58.73	22	AGGCACAGGACACAGTGATT	59.233	20	120	178	297
scaf_0001368_8	p3	(TTA)12	36	151	186	ACTAGGGAGCTGGTTTCAGG	58.72	20	ATCATGCCGAATCGCAACAA	58.906	20	179	69	247	ACTAGGGAGCTGGTTTCAGG	58.72	20	TCTACCTGCATCATGCCGAA	59.17	20	188	69	256	CTAGGGAGCTGGTTTCAGGG	59.456	20	ATCATGCCGAATCGCAACAA	58.906	20	178	70	247
scaf_0001369_8	p3	(CAT)5	15	151	165	TCGCCAATAGCCCAAAACAA	58.378	20	TGATGATGATGGTGGAGTTGGA	59.154	22	117	44	160	TTCGCCAATAGCCCAAAACA	58.378	20	TGATGATGATGGTGGAGTTGGA	59.154	22	118	43	160	TCGCCAATAGCCCAAAACAA	58.378	20	TGATGATGATGGTGGAGTTGG	57.714	21	117	44	160
scaf_0001370_14	p3	(AAT)5	15	151	165	AGTTGCTGAGCAGTGTTTGT	58.245	20	GTTGTTCACCCCTTACTTCTGA	57.919	22	230	53	282	AGTTGCTGAGCAGTGTTTGT	58.245	20	AGTTGTTCACCCCTTACTTCTG	57.913	22	231	53	283	AGTTGCTGAGCAGTGTTTGT	58.245	20	AGTTGTTCACCCCTTACTTCTGA	59.285	23	231	53	283
scaf_0001371_4	p3	(ATG)5	15	151	165	GATTCTTGCTAGTCGCTGGC	59.066	20	CCCCAAGGGCACTTTGAATC	59.102	20	171	42	212	GATTCTTGCTAGTCGCTGGC	59.066	20	AATCGCCTTGAAATGGAGCC	58.894	20	155	42	196	GATTCTTGCTAGTCGCTGGC	59.066	20	GGCACTTTGAATCGCCTTGA	59.119	20	164	42	205
scaf_0001371_5	p3	(ATG)5	15	35	49	GGCTCCATTTCAAGGCGATT	58.894	20	ACGAAAAACATGGGGCATCC	59.105	20	169	61	229	GATCAAGATGAGGGGCTCCA	58.865	20	ACGAAAAACATGGGGCATCC	59.105	20	182	48	229	TGATCAAGATGAGGGGCTCC	58.865	20	ACGAAAAACATGGGGCATCC	59.105	20	183	47	229
scaf_0001371_12	p3	(TGT)6	18	151	168	TGGGGCATATGTTGTTGTTGT	58.397	21	CCAAGACATCACAACCTCACC	58.846	21	108	141	248	TGGGGCATATGTTGTTGTTGTT	59.031	22	CCAAGACATCACAACCTCACC	58.846	21	108	141	248	TTGGGGCATATGTTGTTGTTGT	59.031	22	CCAAGACATCACAACCTCACC	58.846	21	109	140	248
scaf_0001373_2	p4	(AAAG)5	20	13	32	AGTGTGTCTGAGTGTTGGCT	59.167	20	CTACATGCACCACAAAACGC	58.315	20	274	95	368	AGTGTGTCTGAGTGTTGGCT	59.167	20	TACATGCACCACAAAACGCC	59.688	20	273	95	367	AGTGTGTCTGAGTGTTGGCT	59.167	20	GCACCACAAAACGCCTCTTT	59.898	20	268	95	362
scaf_0001373_11	p3	(AAT)8	24	151	174	CCCTTTGCAAGAAAAGAGGCT	59.034	21	ACCATGCATACTTAGCTAGCAA	57.578	22	107	8	114	CCCTTTGCAAGAAAAGAGGCT	59.034	21	AACCATGCATACTTAGCTAGCA	57.578	22	108	8	115	TCCCTTTGCAAGAAAAGAGGC	59.036	21	ACCATGCATACTTAGCTAGCAA	57.578	22	108	7	114
scaf_0001374_15	p3	(ATA)5	15	151	165	ACCCATCCACCGATCATTCA	58.788	20	AGGCAGAAGTCCGTGAGAAG	59.394	20	182	125	306	TGACCCATCCACCGATCATT	58.788	20	AGGCAGAAGTCCGTGAGAAG	59.394	20	184	123	306	AATCATGACCCATCCACCGA	58.788	20	AGGCAGAAGTCCGTGAGAAG	59.394	20	189	118	306
scaf_0001378_5	p3	(TTA)8	24	151	174	GGGGACTGTGAGAGCAAAAC	58.761	20	ATGACTTAGACCCCCAGTGG	58.415	20	107	38	144	GGGGACTGTGAGAGCAAAAC	58.761	20	AATGACTTAGACCCCCAGTGG	59.084	21	108	38	145	GGGGGACTGTGAGAGCAAAA	59.89	20	ATGACTTAGACCCCCAGTGG	58.415	20	108	37	144
scaf_0001379_9	p3	(TCT)11	33	151	183	TGGTAGTAGCTGAATTGATGGGA	58.963	23	TTACATCCTGGGGGCAGAAG	59.081	20	260	41	300	TGGTAGTAGCTGAATTGATGGGA	58.963	23	CTTACATCCTGGGGGCAGAA	59.081	20	261	41	301	TGGTAGTAGCTGAATTGATGGGA	58.963	23	TTCTTACATCCTGGGGGCAG	59.081	20	263	41	303
scaf_0001381_4	p3	(GAA)6	18	151	168	CACCACCATCACCAGTTTCG	59.126	20	GGCTGTTTTGGTATGCCGAA	59.115	20	167	92	258	CACCACCATCACCAGTTTCG	59.126	20	ATGGGCTGTTTTGGTATGCC	58.806	20	170	92	261	CCACCACCATCACCAGTTTC	58.752	20	GGCTGTTTTGGTATGCCGAA	59.115	20	168	91	258
scaf_0001384_14	p3	(AAT)10	30	151	180	TAAAGTGCGGGCAGTTTTTG	57.499	20	GCAAACATAATGCGGACGGA	59.27	20	103	180	282	TTAAAGTGCGGGCAGTTTTTG	58.185	21	GCAAACATAATGCGGACGGA	59.27	20	104	179	282	TAAAGTGCGGGCAGTTTTTG	57.499	20	CCTGCATATAAATGGGCGGT	58.09	20	126	180	305
scaf_0001384_18	p3	(TCT)5	15	151	165	TTCGTTGAGCTCCCCTTTCT	58.943	20	GCTAATCACCCCACCCTCAA	59.376	20	162	103	264	TCTCCCGCTTTCCCTTTCTT	58.935	20	GCTAATCACCCCACCCTCAA	59.376	20	231	34	264	AACTCTCCCGCTTTCCCTTT	59.228	20	GCTAATCACCCCACCCTCAA	59.376	20	234	31	264
scaf_0001384_18	p4	(TTGT)7	28	280	307	TTCGTTGAGCTCCCCTTTCT	58.943	20	GCTAATCACCCCACCCTCAA	59.376	20	162	103	264	TCTCCCGCTTTCCCTTTCTT	58.935	20	GCTAATCACCCCACCCTCAA	59.376	20	231	34	264	AACTCTCCCGCTTTCCCTTT	59.228	20	GCTAATCACCCCACCCTCAA	59.376	20	234	31	264
scaf_0001384_19	p3	(TCT)5	15	22	36	TCCTCGCCTTCTCTTTCTCT	57.776	20	GCTAATCACCCCACCCTCAA	59.376	20	132	4	135	TCCTCGCCTTCTCTTTCTCTT	58.469	21	GCTAATCACCCCACCCTCAA	59.376	20	132	4	135	TTCCTCGCCTTCTCTTTCTCT	58.469	21	GCTAATCACCCCACCCTCAA	59.376	20	133	3	135
scaf_0001388_4	p3	(CAT)5	15	151	165	TCCTCCACTGATAGCCCAAA	58.035	20	AGAAGAGGGGGTTTTAGCCT	57.939	20	219	40	258	ATCCTCCACTGATAGCCCAA	57.803	20	AGAAGAGGGGGTTTTAGCCT	57.939	20	220	39	258	AATCCTCCACTGATAGCCCA	57.803	20	AGAAGAGGGGGTTTTAGCCT	57.939	20	221	38	258
scaf_0001392_8	p3	(TGT)5	15	151	165	TTTCACCCATGTCCTCGGAG	59.387	20	CATCAGTTCGCACGTGGATT	58.921	20	217	39	255	TTTCACCCATGTCCTCGGAG	59.387	20	AAGGTTCATCAGTTCGCACG	58.852	20	223	39	261	GGGCTGACAGTTTGAGGTCT	59.602	20	CATCAGTTCGCACGTGGATT	58.921	20	179	77	255
scaf_0001394_19	p3	(AAT)5	15	151	165	TGTTGGGTTGGTAGTTTGCG	58.974	20	TGCAAACTCCCTAGAAGGCA	58.936	20	136	84	219	GTTGGGTTGGTAGTTTGCGT	58.973	20	TGCAAACTCCCTAGAAGGCA	58.936	20	135	85	219	TGTTGGGTTGGTAGTTTGCG	58.974	20	CACGTCCAAGTGCACCTAAC	59.134	20	183	84	266
scaf_0001395_20	p3	(GAG)6	18	151	168	ATGAGGAGGAGGAGGAGGAG	59.14	20	TTCTTGGGCTTTCTTGGTGC	58.96	20	103	148	250	AGGATGAGGAGGAGGAGGAG	59.14	20	TTCTTGGGCTTTCTTGGTGC	58.96	20	106	145	250	GATGAGGAGGAGGAGGAGGA	59.143	20	TTCTTGGGCTTTCTTGGTGC	58.96	20	104	147	250
scaf_0001398_5	p3	(ATG)7	21	151	171	ACAGGAAGTGTGGGTTGGAA	59.077	20	TCCGCTCCTTCGTTGTCTAG	59.191	20	230	20	249	ACAGGAAGTGTGGGTTGGAA	59.077	20	TTCCGCTCCTTCGTTGTCTA	58.75	20	231	20	250	AGAGCTACAGGAAGTGTGGG	58.729	20	TCCGCTCCTTCGTTGTCTAG	59.191	20	236	14	249
scaf_0001404_12	p3	(CAC)5	15	151	165	CCACCACCACCAACAACAAA	59.102	20	TGCTACTAATTCCATGGCTCCT	58.951	22	141	155	295	CATCAACAACACCACCACCA	58.602	20	TGCTACTAATTCCATGGCTCCT	58.951	22	155	141	295	ATCAACAACACCACCACCAC	58.601	20	TGCTACTAATTCCATGGCTCCT	58.951	22	154	142	295
scaf_0001409_10	p4	(TATT)6	24	151	174	ACCGGCTTATGCTATAGGCC	59.386	20	CCCAAACGAATCCTAATATTGGC	57.879	23	169	73	241	CCGGCTTATGCTATAGGCCA	59.387	20	CCCAAACGAATCCTAATATTGGC	57.879	23	168	74	241	CGGCTTATGCTATAGGCCAA	57.527	20	CCCAAACGAATCCTAATATTGGC	57.879	23	167	75	241
scaf_0001412_5	p3	(CTT)10	30	151	180	GGTGCCACACTCAGTTCAAA	58.611	20	ATCTAGGGGGTCCGATTCCT	59.132	20	277	23	299	GGTGCCACACTCAGTTCAAA	58.611	20	TAGGGGGTCCGATTCCTGAT	59.434	20	274	23	296	GTGCCACACTCAGTTCAAAGT	58.983	21	ATCTAGGGGGTCCGATTCCT	59.132	20	276	24	299
scaf_0001412_6	p3	(AAT)9	27	151	177	CTTGGTTTGAGGCGATGACT	58.186	20	TGGCAAGCCTCATTCATTGT	58.073	20	277	0	276	CTTGGTTTGAGGCGATGACT	58.186	20	GGCAAGCCTCATTCATTGTCT	58.902	21	276	0	275	CTTGGTTTGAGGCGATGACT	58.186	20	TGGCAAGCCTCATTCATTGTC	59.179	21	277	0	276
scaf_0001412_17	p3	(TTA)7	21	151	171	ACATCCTCCACATGTAGCCC	59.16	20	CCCCAAGGCATCCTAAATGC	58.957	20	192	119	310	CATCCTCCACATGTAGCCCA	59.161	20	CCCCAAGGCATCCTAAATGC	58.957	20	191	120	310	ACATCCTCCACATGTAGCCC	59.16	20	GGTAACCCCAAGGCATCCTA	58.781	20	197	119	315
scaf_0001415_14	p3	(ATT)6	18	151	168	CAGTTCTGACAAACAAGGCTGA	59.055	22	GCCCCAAACCATCTCAAACC	59.392	20	103	200	302	TCAGTTCTGACAAACAAGGCTG	59.055	22	GCCCCAAACCATCTCAAACC	59.392	20	104	199	302	TGCGTTGAAATCAGTTCTGACA	58.798	22	GCCCCAAACCATCTCAAACC	59.392	20	114	189	302
scaf_0001419_12	p4	(ATAA)6	24	151	174	ACCTCTTGGAATCCACGTCT	58.354	20	TCCCCATTTGGTTCCTGGAT	58.608	20	249	5	253	ACCTCTTGGAATCCACGTCT	58.354	20	ATCCCCATTTGGTTCCTGGA	58.608	20	250	5	254	ACCTCTTGGAATCCACGTCT	58.354	20	CCCCATTTGGTTCCTGGATG	58.512	20	248	5	252
scaf_0001422_6	p4	(TTTA)5	20	151	170	GTCACCCAAATATGCCAATTCA	57.266	22	GGCTTTAATTGTGGGGCACA	59.027	20	135	0	134	GTCACCCAAATATGCCAATTCA	57.266	22	ACAACAACACCACCCCAAAG	58.809	20	196	0	195	GTCACCCAAATATGCCAATTCA	57.266	22	AAGGGCTTTAATTGTGGGGC	58.724	20	138	0	137
scaf_0001423_2	p3	(TTG)5	15	151	165	ACCTTCTGTGACATCCTTCGA	58.752	21	GCATCAGTCACCAAACCCTC	58.831	20	169	60	228	AGAGAGGAGAGTGCTTCACA	57.699	20	GCATCAGTCACCAAACCCTC	58.831	20	125	104	228	ACCTTCTGTGACATCCTTCGA	58.752	21	TGCATCAGTCACCAAACCCT	59.522	20	170	60	229
scaf_0001425_5	p3	(TTC)7	21	151	171	TTCGTAGCTGCTTCATGTGC	58.921	20	ATGAAGCCTCTGAAGTCCCC	59.085	20	139	70	208	TACTGCCTTCGTAGCTGCTT	59.104	20	ATGAAGCCTCTGAAGTCCCC	59.085	20	146	63	208	CCTTGGCCTGCTCCTATTCT	59.157	20	ATGAAGCCTCTGAAGTCCCC	59.085	20	165	44	208
scaf_0001426_8	p3	(ACC)5	15	151	165	ACTACCACTACCACTGCCAC	59.026	20	GGTGGTAGTAGTGGTGGCAT	59.09	20	139	94	232	CGCCACCACTACTGCTACTA	58.899	20	GTGGCAGTGGTAGTGGTAGT	59.026	20	110	4	113	CCACAACCACCACCATCATG	59.11	20	GGTGGTAGTAGTGGTGGCAT	59.09	20	114	119	232
scaf_0001429_6	p3	(CTC)8	24	419	442	AGGGTTGCGGGTGCTAATAT	59.156	20	ACCTTTCACCATCCACCTGT	58.851	20	105	217	321	ACAGGTGGATGGTGAAAGGT	58.851	20	GGAGGAGGAGGAGAGGAGAT	58.842	20	129	302	430	ACAAAGGACAGGTGGATGGT	58.851	20	GGAGGAGGAGGAGAGGAGAT	58.842	20	136	295	430
scaf_0001429_7	p3	(GGA)5	15	407	421	ACAGGTGGATGGTGAAAGGT	58.851	20	GGAGGAGGAGGAGAGGAGAT	58.842	20	129	34	162	ACAAAGGACAGGTGGATGGT	58.851	20	GGAGGAGGAGGAGAGGAGAT	58.842	20	136	27	162	GGTCACACACACACACACAA	58.839	20	GGAGGAGGAGGAGAGGAGAT	58.842	20	156	7	162
scaf_0001429_8	p3	(GGA)5	15	151	165	AGGAGCTTCGTCGAAACTGA	59.04	20	ACAGTGAGTTTAGGGGAGGC	59.015	20	117	161	277	AGGAGCTTCGTCGAAACTGA	59.04	20	CAGTGAGTTTAGGGGAGGCA	59.016	20	116	161	276	AGGAGCTTCGTCGAAACTGA	59.04	20	AGGCAAAGGGATCATCGTCA	59.088	20	101	161	261
scaf_0001429_9	p3	(GGA)5	15	2	16	GCCTCCCCTAAACTCACTGT	59.015	20	GGAGGAGGATTTGTGGGTGA	59.008	20	215	109	323	TGCCTCCCCTAAACTCACTG	59.016	20	GGAGGAGGATTTGTGGGTGA	59.008	20	216	108	323	TCACGCAGACAAACCCCTAT	59.019	20	GGAGGAGGATTTGTGGGTGA	59.008	20	251	73	323
scaf_0001429_9	p4	(CTTT)6	24	151	174	GCCTCCCCTAAACTCACTGT	59.015	20	GGAGGAGGATTTGTGGGTGA	59.008	20	215	109	323	TGCCTCCCCTAAACTCACTG	59.016	20	GGAGGAGGATTTGTGGGTGA	59.008	20	216	108	323	TCACGCAGACAAACCCCTAT	59.019	20	GGAGGAGGATTTGTGGGTGA	59.008	20	251	73	323
scaf_0001429_24	p3	(TTC)12	36	151	186	GACACAAAGCGGTCTTCTCC	58.851	20	CCGCAATTGAAGAAGGGCTT	59.109	20	203	61	263	GACACAAAGCGGTCTTCTCC	58.851	20	GACTCACTCTACCGCCTTGT	59.111	20	176	61	236	GACACAAAGCGGTCTTCTCC	58.851	20	AAGCTGGAAGACCGCAATTG	59.116	20	214	61	274
scaf_0001431_14	p3	(TAA)5	15	151	165	AGTAAGGTCACTACAGGATGGG	58.624	22	GACGCTGAGTCCCCAGAAC	60.08	19	100	184	283	AGTAAGGTCACTACAGGATGGG	58.624	22	GACGCTGAGTCCCCAGAA	58.622	18	100	184	283	AAGTAAGGTCACTACAGGATGGG	59.225	23	ACGCTGAGTCCCCAGAAC	58.939	18	100	183	282
scaf_0001432_4	p3	(GGT)8	24	151	174	ATTGGTAGTGGTGGGAGGTG	59.008	20	TAACCCTAACGTCCACACCC	59.024	20	157	117	273	GAGGGGAGGTTGAGTTGACA	58.943	20	TAACCCTAACGTCCACACCC	59.024	20	228	46	273	AGGGGAGGTTGAGTTGACAG	58.94	20	TAACCCTAACGTCCACACCC	59.024	20	227	47	273
scaf_0001433_3	p3	(ATT)7	21	151	171	TTGGGTAGGTGGTTGTTGGT	59.072	20	CCCCACCAAAAGACATACCAC	58.832	21	141	67	207	TGGTTGTTGGGTAGGTGGTT	59.072	20	CCCCACCAAAAGACATACCAC	58.832	21	147	61	207	GGGTGGGTGAATGATGGGTA	59.077	20	CCCCACCAAAAGACATACCAC	58.832	21	201	7	207
scaf_0001433_6	p4	(AAAT)5	20	151	170	TCAATCTTCCCTTGTAGTGAGGT	58.832	23	TTTATTTTTGGTGGGCCGCA	58.951	20	104	53	156	CAATCTTCCCTTGTAGTGAGGT	57.44	22	TTTATTTTTGGTGGGCCGCA	58.951	20	103	54	156	TCAATCTTCCCTTGTAGTGAGGT	58.832	23	TTATTTTTGGTGGGCCGCAC	59.681	20	103	53	155
scaf_0001434_4	p4	(AAAT)7	28	151	178	CAGTCAATTGGTGGGACGAC	58.843	20	TCACGTGGTGTTTGTTTGCA	59.118	20	109	188	296	CAGTCAATTGGTGGGACGAC	58.843	20	CACGTGGTGTTTGTTTGCAG	58.733	20	108	188	295	CAGTCAATTGGTGGGACGAC	58.843	20	TGGTTCTCACGTGGTGTTTG	58.625	20	115	188	302
scaf_0001436_19	p3	(GAA)6	18	151	168	TCGGTCATCTCAGATCGACC	58.69	20	TCCTTCTCCTAAATTCCAACCCT	58.816	23	120	32	151	CGGTCATCTCAGATCGACCT	58.686	20	TCCTTCTCCTAAATTCCAACCCT	58.816	23	119	33	151	GATGACATCAGCACGTGTCG	59.358	20	TCCTTCTCCTAAATTCCAACCCT	58.816	23	137	15	151
scaf_0001438_18	p3	(CAT)5	15	151	165	AGTTTCTATTCCACTTATGGCCC	58.207	23	ATTCACGAATCCCACCCACT	59.008	20	100	116	215	GTTTCTATTCCACTTATGGCCCA	58.467	23	TATTCACGAATCCCACCCACT	58.807	21	100	117	216	AGTTTCTATTCCACTTATGGCCC	58.207	23	TATTCACGAATCCCACCCACT	58.807	21	101	116	216
scaf_0001439_4	p3	(AAT)5	15	151	165	GTCGTGGTTGTAATGGAGCG	59.281	20	TCTGAAGCTGGTGCATGGAT	59.378	20	100	37	136	GATCCATGCACCAGCTTCAG	58.977	20	TGCTTGCCAAGTTCTTGACA	58.239	20	193	116	308	TGTCGTGGTTGTAATGGAGC	58.197	20	CTGAAGCTGGTGCATGGATC	58.977	20	100	36	135
scaf_0001441_8	p3	(TTA)11	33	151	183	TGGGAATCTGCCAAAGTGTT	57.62	20	CATCTTTCCCTTTGCTTCCCA	58.471	21	107	183	289	TGGGAATCTGCCAAAGTGTT	57.62	20	ACATCTTTCCCTTTGCTTCCC	58.47	21	108	183	290	TGTCCTATTTGGTGCAGCTT	57.415	20	CATCTTTCCCTTTGCTTCCCA	58.471	21	165	125	289
scaf_0001443_6	p3	(GTC)5	15	151	165	GCCTCTACAATTGGCTCAGC	58.98	20	ACGACCTTCCCATTGCTACA	59.019	20	142	13	154	GCCTCTACAATTGGCTCAGC	58.98	20	GGGGGTTCTTCTACTGCCAT	59.08	20	191	13	203	TACCATCCTACGGGTCCTGA	59.071	20	GGGGGTTCTTCTACTGCCAT	59.08	20	102	102	203
scaf_0001444_10	p3	(TTA)8	24	151	174	AGAAGCAAGGTGAGGTTGGT	59.153	20	GAGAGTCTTGGTGTGGGACA	58.951	20	101	33	133	AGAAGCAAGGTGAGGTTGGT	59.153	20	TGAGAGTCTTGGTGTGGGAC	58.951	20	102	33	134	TGCTCCCCACCTAAGTCAAG	59.016	20	TCCAGGAGAAGCTTCACCAA	58.566	20	149	55	203
scaf_0001444_11	p3	(TTA)8	24	18	41	TGGTGAAGCTTCTCCTGGAA	58.566	20	TTTGACGAGATCCACTCCGA	58.459	20	271	52	322	TTGGTGAAGCTTCTCCTGGA	58.566	20	TTTGACGAGATCCACTCCGA	58.459	20	272	51	322	TGGTGAAGCTTCTCCTGGAA	58.566	20	TTGACGAGATCCACTCCGAT	58.236	20	270	52	321
scaf_0001447_3	p4	(TTAT)5	20	151	170	TGTTCAATTCTCAAGTACGGGAG	58.434	23	CGGGTAAGCCAGCTACCAAA	60.036	20	230	87	316	TGTTCAATTCTCAAGTACGGGA	57.389	22	CGGGTAAGCCAGCTACCAAA	60.036	20	230	87	316	TGTTCAATTCTCAAGTACGGGAG	58.434	23	GGGTAAGCCAGCTACCAAAAC	59.183	21	229	87	315
scaf_0001447_7	p4	(AGGG)6	24	151	174	TGCTACGGTTGCTTGGGATA	59.094	20	TATGCTCAGCAATGGCAACC	58.895	20	101	22	122	TGCTACGGTTGCTTGGGATA	59.094	20	ACCACATAGATTGCTCCCCC	59.153	20	170	22	191	TGCTACGGTTGCTTGGGATA	59.094	20	CCCTCCCTTCATCCAACCAA	59.296	20	136	22	157
scaf_0001448_6	p3	(CCA)5	15	151	165	ATTAGGTGGTGCAGTTCGGT	59.309	20	TAGGTGGAAACAGTGGTGGT	58.486	20	127	51	177	TTAGGTGGTGCAGTTCGGTT	59.529	20	TAGGTGGAAACAGTGGTGGT	58.486	20	126	52	177	AGGCATGAGAAGACCGATCT	58.213	20	AGGGTGGTGCCAATCATAGT	58.701	20	138	0	137
scaf_0001448_14	p3	(ATT)6	18	151	168	TAACACCCACACCACCATCC	59.597	20	CCTAATTCCTGGCCGAATGC	59.046	20	128	112	239	CCACACCACCATCCATCACT	59.671	20	CCTAATTCCTGGCCGAATGC	59.046	20	122	118	239	TAACACCCACACCACCATCC	59.597	20	CTCCCTAATTCCTGGCCGAA	59.163	20	131	112	242
scaf_0001449_4	p3	(GAA)5	15	151	165	CACCAGCTCCATTAACCTGC	58.902	20	CGCCTTTGAATCCGCATCTT	59.265	20	209	74	282	AAGAACCAGGCTTCCAAGGA	58.851	20	CGCCTTTGAATCCGCATCTT	59.265	20	247	36	282	CAAGGAGGGATCGGAGAACA	58.805	20	CGCCTTTGAATCCGCATCTT	59.265	20	233	50	282
scaf_0001450_6	p3	(AAT)6	18	151	168	GCGTTTGGATCACTAGGATGG	58.787	21	TCCTTAAGCTCCCTTGTGGA	57.961	20	168	74	241	GCGTTTGGATCACTAGGATGG	58.787	21	AGCTCCCTTGTGGAATGATCA	59.082	21	162	74	235	GCGTTTGGATCACTAGGATGG	58.787	21	TCCTTAAGCTCCCTTGTGGAA	58.655	21	168	74	241
scaf_0001451_21	p3	(TTA)5	15	151	165	CGGTTTCTTCTTCATCTTCTCCA	58.43	23	CAAGGCAAATCCCGCAGTAT	58.607	20	246	63	308	TCGGTTTCTTCTTCATCTTCTCC	58.178	23	CAAGGCAAATCCCGCAGTAT	58.607	20	247	62	308	CGGTTTCTTCTTCATCTTCTCCA	58.43	23	AGAAGACAAGGCAAATCCCG	58.174	20	252	63	314
scaf_0001451_22	p3	(TCT)6	18	151	168	ATACTGCGGGATTTGCCTTG	58.607	20	AGGAATTTGGCCACCTTCCT	59.214	20	181	130	310	ATACTGCGGGATTTGCCTTG	58.607	20	GGCGAATCCCACAGCATTTT	59.468	20	135	130	264	ATACTGCGGGATTTGCCTTG	58.607	20	TTCTTCCCACCAAGGCGAAT	59.596	20	148	130	277
scaf_0001452_8	p3	(CAC)5	15	151	165	TGCATTCGGTGGCATAATTTC	57.565	21	GTGGTGGTGCTGGAATGAAG	59.116	20	100	59	158	TGGCATAATTTCCACTAGCCG	58.429	21	ATTTAGTGGTGGTGGTGGTG	57.714	20	102	68	169	TTGCATTCGGTGGCATAATTTC	58.22	22	GTGGTGGTGCTGGAATGAAG	59.116	20	101	58	158
scaf_0001454_3	p3	(TTG)5	15	151	165	AATGCCTAGCGGTCTAGTCG	59.331	20	AGAGAGAAGGCTAGCACGAC	58.9	20	139	75	213	TTGTGAATGCCTAGCGGTCT	59.387	20	AGAGAGAAGGCTAGCACGAC	58.9	20	144	70	213	AATGCCTAGCGGTCTAGTCG	59.331	20	GGCTAGCACGACAACATGTT	58.843	20	131	75	205
scaf_0001454_9	p3	(AAC)5	15	151	165	CAAGCCTGCAAAAGCAAAGC	59.415	20	TCGGTTAGCGTTCTTGAGGT	59.036	20	277	11	287	AGACGTTCATGCTCTGAGGA	58.45	20	TCGGTTAGCGTTCTTGAGGT	59.036	20	178	110	287	CAAGCCTGCAAAAGCAAAGC	59.415	20	AGTACCAGGAACTCAGCCAG	58.729	20	230	11	240
scaf_0001458_1	p4	(AAAT)5	20	151	170	TCGGCTTCACTTGACTTGTT	57.674	20	TGCCTCTTTTCACATCCCAAG	58.482	21	182	41	222	TCGGCTTCACTTGACTTGTT	57.674	20	CTTGCCTCTTTTCACATCCCA	58.482	21	184	41	224	TTCGGCTTCACTTGACTTGT	57.674	20	TGCCTCTTTTCACATCCCAAG	58.482	21	183	40	222
scaf_0001458_5	p3	(GGT)5	15	151	165	GCGAACTCGGCTTCAAGAAT	58.92	20	TCCCTTAACACCCGAACCAG	59.312	20	193	83	275	GCGAACTCGGCTTCAAGAAT	58.92	20	TAGCTTCAACTCGACCACCC	59.393	20	218	83	300	GCGAACTCGGCTTCAAGAAT	58.92	20	GTCCCTTAACACCCGAACCA	59.602	20	194	83	276
scaf_0001458_6	p3	(TGA)8	24	151	174	TGTGGGGAGTGTTGATTCGA	58.947	20	GCTTCACCGAAATCCTCATCT	58.089	21	138	72	209	TGTGGGGAGTGTTGATTCGA	58.947	20	AGCTTCACCGAAATCCTCATC	58.089	21	139	72	210	GGGGAGTGTTGATTCGAGGA	59.097	20	GCTTCACCGAAATCCTCATCT	58.089	21	135	75	209
scaf_0001458_7	p3	(TGA)9	27	151	177	TCGGTGAAGCTAGTGTTGGT	58.955	20	TCACTCTCCTCGTCATCATCA	57.995	21	220	74	293	TCGGTGAAGCTAGTGTTGGT	58.955	20	TCTTCACTCTCCTCGTCATCA	57.927	21	223	74	296	TCGGTGAAGCTAGTGTTGGT	58.955	20	TCATCTTCACTCTCCTCGTCA	57.927	21	226	74	299
scaf_0001458_10	p3	(TTA)5	15	151	165	CAGGTTTGTATCAAGGCCTCA	57.928	21	CCCCCTTGCTGCCTTAGTTT	60.252	20	106	28	133	CAGGTTTGTATCAAGGCCTCA	57.928	21	CCCCTTGCTGCCTTAGTTTA	57.493	20	105	28	132	TCAGGTTTGTATCAAGGCCTC	57.65	21	CCCCCTTGCTGCCTTAGTTT	60.252	20	107	27	133
scaf_0001458_15	p3	(AGC)7	21	151	171	AAGCAAGAGCAGGAGTAGCA	59.02	20	TGTTTCTCCTCCTTCGGCTT	58.943	20	122	134	255	GTCGTCAGAAGCAAGAGCAG	58.933	20	TGTTTCTCCTCCTTCGGCTT	58.943	20	130	126	255	AGATGACGTCGCTCGAGTAG	59.068	20	TGTTTCTCCTCCTTCGGCTT	58.943	20	175	81	255
scaf_0001462_5	p3	(TTA)10	30	151	180	TTCTCTCTCATTCGCTCGCT	58.901	20	CTTAAGGGGTGGTCCAGTGT	58.935	20	113	118	230	TTCTCTCTCATTCGCTCGCT	58.901	20	ACTTAAGGGGTGGTCCAGTG	58.935	20	114	118	231	CACTGGACCACCCCTTAAGT	58.935	20	GCGCATGTCTGTAACCACAA	59.128	20	100	212	311
scaf_0001465_1	p3	(TAT)10	30	151	180	CTGTCTACACTTGGGTCCGT	59.033	20	TGGTGGGTGACAAAGACTGA	58.791	20	249	28	276	ACTGTCTACACTTGGGTCCG	59.033	20	TGGTGGGTGACAAAGACTGA	58.791	20	250	27	276	TGTCTACACTTGGGTCCGTC	59.036	20	TGGTGGGTGACAAAGACTGA	58.791	20	248	29	276
scaf_0001465_8	p3	(TTA)5	15	11	25	TGTTGGTGCAAAAAGCCGAT	59.25	20	TCCGTCTAGGTGAATAAAACGT	57.211	22	163	39	201	TTTGTTGGTGCAAAAAGCCG	58.636	20	TCCGTCTAGGTGAATAAAACGT	57.211	22	165	37	201	ACGTTTTATTCACCTAGACGGA	57.211	22	GAATCGCCGAGTGACCTTTT	58.56	20	216	180	395
scaf_0001465_11	p4	(TTAT)5	20	151	170	TGTTCCCATTGTGAAATTGGCT	59.029	22	ACCAGCCAATCAATTTCCCTC	58.539	21	123	28	150	TGTTCCCATTGTGAAATTGGCT	59.029	22	CCCTCTCTATCCGTTAGCAGT	58.411	21	107	28	134	TGTTCCCATTGTGAAATTGGCT	59.029	22	ACCAGCCAATCAATTTCCCT	57.371	20	123	28	150
scaf_0001466_1	p3	(CAA)5	15	151	165	AGAAGAGTCAAGTACCGCCC	59.104	20	GTGCGGTCACTAGCTTGATG	58.998	20	147	80	226	GCCCGACTAGACAGAATGGA	58.888	20	GTGCGGTCACTAGCTTGATG	58.998	20	131	96	226	AGAAGAGTCAAGTACCGCCC	59.104	20	GTATTGGCATTGGCGAAGGT	58.897	20	113	80	192
scaf_0001467_1	p4	(AAAT)5	20	151	170	TGTCCAAATCCTAGGGGTGA	57.647	20	GTGGATGGTTTGGTTGGCAT	59.024	20	160	58	217	TGTCCAAATCCTAGGGGTGAA	58.362	21	GTGGATGGTTTGGTTGGCAT	59.024	20	160	58	217	TTGTCCAAATCCTAGGGGTGA	58.362	21	GTGGATGGTTTGGTTGGCAT	59.024	20	161	57	217
scaf_0001468_15	p3	(AAG)5	15	151	165	GCTAACCAAGATTAGAGGGGGA	58.954	22	CAGACTGCAGCAATCTTGAGT	58.575	21	150	63	212	GCTAACCAAGATTAGAGGGGGA	58.954	22	ACAGACTGCAGCAATCTTGAG	58.575	21	151	63	213	AGCTAACCAAGATTAGAGGGGG	58.951	22	CAGACTGCAGCAATCTTGAGT	58.575	21	151	62	212
scaf_0001472_9	p3	(TCT)5	15	151	165	TACTCGGCTTGGTTGTTTGC	59.051	20	ACCACCTACATTTCACTTGGC	58.485	21	197	4	200	TACTCGGCTTGGTTGTTTGC	59.051	20	CCACCTACATTTCACTTGGCT	58.205	21	196	4	199	TACTCGGCTTGGTTGTTTGC	59.051	20	CAGAAATAGGTTGCATCACGC	57.943	21	143	4	146
scaf_0001472_14	p4	(TTTG)5	20	325	344	CGTTCCCACTTCCTCTCTGT	59.03	20	ACACATGCAGAGAGACACCA	58.949	20	235	55	289	GGTTGGGTTGTGCTCCATTT	58.952	20	ACACATGCAGAGAGACACCA	58.949	20	265	25	289	TAGGTTGGGTTGTGCTCCAT	58.928	20	ACACATGCAGAGAGACACCA	58.949	20	267	23	289
scaf_0001472_15	p4	(TTTG)5	20	151	170	TGGTGTCTCTCTGCATGTGT	58.949	20	AGGACGTTTCATTTCCTCGT	57.166	20	224	96	319	TGGTGTCTCTCTGCATGTGT	58.949	20	AGGACGTTTCATTTCCTCGTT	57.878	21	224	96	319	TGGTGTCTCTCTGCATGTGT	58.949	20	TGCGAAAGGGAACTACTGAATG	58.665	22	198	96	293
scaf_0001473_5	p3	(TTC)5	15	294	308	GCGATGGACACGTGTTAGAC	59.01	20	CGCCTAGGGTTTCAGAGTGA	59.104	20	169	20	188	GCGATGGACACGTGTTAGAC	59.01	20	TCGCCTAGGGTTTCAGAGTG	59.104	20	170	20	189	ACACGTGATGGATAGGCGAT	58.959	20	CGCCTAGGGTTTCAGAGTGA	59.104	20	184	5	188
scaf_0001474_3	p3	(TTA)11	33	151	183	TGTGTTGTAAGCTAACCGGT	57.085	20	CAACTAGGCCGACCAAAACC	59.121	20	104	219	322	TGTGTTGTAAGCTAACCGGT	57.085	20	CCAACTAGGCCGACCAAAAC	59.121	20	105	219	323	TGTGTTGTAAGCTAACCGGT	57.085	20	AACTAGGCCGACCAAAACCT	59.231	20	103	219	321
scaf_0001475_2	p3	(AAT)12	36	151	186	TCCCAAAAAGGCATGGTAAGT	57.747	21	TCTCGTCCATTTTGGGAGTTTC	58.591	22	224	64	287	TCCCAAAAAGGCATGGTAAGT	57.747	21	CTCGTCCATTTTGGGAGTTTCT	58.588	22	223	64	286	TCCCAAAAAGGCATGGTAAGT	57.747	21	CTTTCTCGTCCATTTTGGGAGT	58.588	22	227	64	290
scaf_0001475_8	p3	(TAT)5	15	151	165	ATCACCCCTACTTGCACCAG	59.379	20	AGGAATTGGAACTTCATCAGCA	57.962	22	185	37	221	GCACCAGGCACATGTTTCAA	59.611	20	AGGAATTGGAACTTCATCAGCA	57.962	22	172	50	221	ATCACCCCTACTTGCACCAG	59.379	20	GCTACTCGAAGACTCTAGCAAT	57.438	22	278	37	314
scaf_0001475_18	p4	(TTTC)5	20	151	170	TGTCATCCCTGCTGTGACAT	59.013	20	CCATGTGTTGAGTACCAAGGG	58.564	21	228	69	296	CTTGTGTCATCCCTGCTGTG	58.837	20	CCATGTGTTGAGTACCAAGGG	58.564	21	232	65	296	GCTGTATGTGTTGGTGTCCC	58.835	20	CCATGTGTTGAGTACCAAGGG	58.564	21	170	127	296
scaf_0001477_6	p4	(AAGA)5	20	151	170	AGATGCATTTGAAGTGAGGCA	58.201	21	GCTTCACTCATGGGTTGTGT	58.391	20	145	47	191	AGATGCATTTGAAGTGAGGCA	58.201	21	GCTTCACTCATGGGTTGTGT	58.391	20	240	47	286	AGATGCATTTGAAGTGAGGCA	58.201	21	AGCTTCACTCATGGGTTGTG	58.098	20	146	47	192
scaf_0001478_3	p3	(TCC)5	15	151	165	CGAGCTTCTTGGTTCTGCAA	58.771	20	AGGAGGAGGAAGAAAACGCA	58.943	20	121	39	159	TTGCGAGCTTCTTGGTTCTG	58.771	20	AGGAGGAGGAAGAAAACGCA	58.943	20	124	36	159	GTTGCGAGCTTCTTGGTTCT	58.77	20	AGGAGGAGGAAGAAAACGCA	58.943	20	125	35	159
scaf_0001478_4	p3	(TCC)5	15	4	18	TCCTCCTCCTCCTCCTTCTG	59.366	20	CACATCTGGTGGGATTTTCTGT	58.575	22	205	3	207	TCCTCCTCCTCCTCCTTCTG	59.366	20	AATGTTAGTGCCACATCTGGT	57.56	21	216	3	218	TTCCTCCTCCTCCTCCTTCT	58.601	20	CACATCTGGTGGGATTTTCTGT	58.575	22	206	2	207
scaf_0001478_18	p3	(AAT)6	18	151	168	TGTTGGAGGGTTCATAGCATT	57.262	21	TGTGAAAGCTTCCAAAGTGGA	57.988	21	155	90	244	TTGTTGGAGGGTTCATAGCAT	57.262	21	TGTGAAAGCTTCCAAAGTGGA	57.988	21	156	89	244	ATTGTTGGAGGGTTCATAGCA	57.262	21	TGTGAAAGCTTCCAAAGTGGA	57.988	21	157	88	244
scaf_0001483_1	p3	(TTA)8	24	151	174	GCCAACTGATGAAACATAGACCA	58.99	23	TGTGAGAGAATGTGAGAGGAGAG	58.984	23	217	4	220	TGCCAACTGATGAAACATAGACC	58.99	23	TGTGAGAGAATGTGAGAGGAGAG	58.984	23	218	3	220	GCCAACTGATGAAACATAGACCA	58.99	23	TGTGAGAGAATGTGAGAGGAGA	57.96	22	217	4	220
scaf_0001483_21	p3	(GAA)5	15	151	165	GGACCACCTTCTATCGTCCC	59.249	20	GAAGCGACTTTGGCTCGAAT	58.92	20	168	29	196	GGACCACCTTCTATCGTCCC	59.249	20	GAGAGGGTGAGAAGCGACTT	59.108	20	178	29	206	GGACCACCTTCTATCGTCCC	59.249	20	TCGTCCAAGTTGACTCACCA	58.884	20	112	29	140
scaf_0001486_8	p3	(AAG)6	18	151	168	CGAACTGAACCGTAATTCAACA	57.281	22	GTGGAGGAGAAGGAAGAACGA	59.106	21	150	83	232	CGAACTGAACCGTAATTCAACA	57.281	22	TCCACCCATCGGAGTAATGA	57.832	20	173	83	255	CGAACTGAACCGTAATTCAACA	57.281	22	TGGAGGAGAAGGAAGAACGA	57.696	20	149	83	231
scaf_0001489_2	p3	(ATT)5	15	151	165	GCTCACCTTTTGCGCTCTAA	58.843	20	TATCCTTGAGAGGCTCGCTG	58.964	20	235	30	264	GCTCACCTTTTGCGCTCTAA	58.843	20	GGCCAAAAACCTAGAAGGGC	59.104	20	215	30	244	ATAGGTTGGGCTCACTTGGG	59.374	20	TATCCTTGAGAGGCTCGCTG	58.964	20	262	3	264
scaf_0001491_2	p3	(ACC)5	15	151	165	CCCGGTTCTCCATCTCTCTC	58.963	20	GTGGTGGAAAATCTTGCGGT	59.041	20	241	68	308	CCCGGTTCTCCATCTCTCTC	58.963	20	ACGGTGGTGGAAAATCTTGC	59.041	20	244	68	311	CTCCCGGTTCTCCATCTCTC	58.963	20	GTGGTGGAAAATCTTGCGGT	59.041	20	243	66	308
scaf_0001491_13	p4	(TTTA)5	20	151	170	ACATGCTCTCCTGTTTCAACG	58.854	21	CCTGCGTTTGAATGGTAGGG	58.905	20	108	25	132	ACATGCTCTCCTGTTTCAACG	58.854	21	CCCTGCGTTTGAATGGTAGG	58.905	20	109	25	133	TGCTCTCCTGTTTCAACGAG	57.845	20	CCTGCGTTTGAATGGTAGGG	58.905	20	105	28	132
scaf_0001491_23	p3	(AAG)10	30	151	180	GCCAGTGGAATTGGTATGGC	59.253	20	TTTTTCATCCGCTGCGTCAT	58.836	20	143	104	246	GCCAGTGGAATTGGTATGGC	59.253	20	ATTTTTCATCCGCTGCGTCA	58.836	20	144	104	247	GGTATGGCTTCTGCGTCAAA	58.551	20	TTTTTCATCCGCTGCGTCAT	58.836	20	131	116	246
scaf_0001492_5	p3	(CAC)6	18	151	168	ACCATCATCACCACCACTGT	58.933	20	GATACTGGTGGTGGTAGCGA	58.891	20	107	172	278	ACCATCATCACCACCACTGT	58.933	20	TACTGGTGGTGGTAGCGATG	59.178	20	105	172	276	ACCATCATCACCACCACTGT	58.933	20	TGATACTGGTGGTGGTAGCG	59.178	20	108	172	279
scaf_0001497_7	p3	(TCC)8	24	151	174	TCATCAATGGGTCAGCCAGT	59.006	20	AAGAGGAGGAGGAGGAGGAG	59.066	20	129	49	177	AGCCCTGACATTGGAGTTCA	58.933	20	AAGAGGAGGAGGAGGAGGAG	59.066	20	146	32	177	TCAGCCCTGACATTGGAGTT	58.933	20	AAGAGGAGGAGGAGGAGGAG	59.066	20	148	30	177
scaf_0001498_5	p3	(AGA)5	15	151	165	GCCGTCTCCTATTGTTACTGC	58.797	21	TGTGTTAGGGCTGACTCTCC	58.733	20	101	37	137	GCCGTCTCCTATTGTTACTGC	58.797	21	CCCCTCTTTTGTGTTAGGGC	58.454	20	110	37	146	GCCGTCTCCTATTGTTACTGC	58.797	21	GTGTTAGGGCTGACTCTCCT	58.437	20	100	37	136
scaf_0001499_5	p3	(AAT)11	33	151	183	GCTTACTGCCACACTCCATG	58.91	20	GGAGGCTGAATAGTGCTCCT	58.873	20	233	0	232	GCTTACTGCCACACTCCATG	58.91	20	TGGAGGCTGAATAGTGCTCC	59.167	20	234	0	233	GCTTACTGCCACACTCCATG	58.91	20	CGTGTGTGTGTAATGGAGGC	59.204	20	247	0	246
scaf_0001499_9	p3	(AAT)10	30	151	180	CAGCCTGCAAACCAACTGTA	58.682	20	TCCCTCTTGCTTTCTCTCCC	58.72	20	230	70	299	CAGCCTGCAAACCAACTGTA	58.682	20	CCCTCTTGCTTTCTCTCCCT	58.716	20	229	70	298	CAGCCTGCAAACCAACTGTA	58.682	20	CCGTTCTTCCCCTCTCTTCT	58.437	20	256	70	325
scaf_0001501_15	p3	(TGG)5	15	151	165	TGTGTGCAAATAGAAGCTCCC	58.564	21	CCAACCACACCCATCTCTCT	59.013	20	112	1	112	TGTGTGCAAATAGAAGCTCCC	58.564	21	CTATTGCGACCACCACCAAC	59.198	20	127	1	127	GTGTGCAAATAGAAGCTCCCT	58.284	21	CCAACCACACCCATCTCTCT	59.013	20	111	2	112
scaf_0001501_18	p3	(CCA)9	27	151	177	TATTCTCCACCACCACCACC	59.011	20	GGAGGAGGAGGAGAGGGTTA	59.065	20	156	144	299	TATTCTCCACCACCACCACC	59.011	20	GTGAGAGAGGAGGAGGAGGA	59.077	20	176	144	319	TATTCTCCACCACCACCACC	59.011	20	GGAGGAGAGGGTTATGGTGG	58.868	20	150	144	293
scaf_0001501_18	p3	(CTC)9	27	288	314	TATTCTCCACCACCACCACC	59.011	20	GGAGGAGGAGGAGAGGGTTA	59.065	20	156	144	299	TATTCTCCACCACCACCACC	59.011	20	GTGAGAGAGGAGGAGGAGGA	59.077	20	176	144	319	TATTCTCCACCACCACCACC	59.011	20	GGAGGAGAGGGTTATGGTGG	58.868	20	150	144	293
scaf_0001501_19	p3	(CCA)9	27	14	40	TATTCTCCACCACCACCACC	59.011	20	GTGATCGATGGGAGGAGGAG	59.035	20	225	7	231	TATTCTCCACCACCACCACC	59.011	20	GGAGGAGGAGGAGAGGGTTA	59.065	20	156	7	162	TATTCTCCACCACCACCACC	59.011	20	GTGAGAGAGGAGGAGGAGGA	59.077	20	176	7	182
scaf_0001504_20	p4	(AAAT)5	20	151	170	ACAAGACCTAAAAAGCCCGA	57.057	20	CCAGTCCGGTCTGATGTTTG	58.557	20	188	122	309	ACAAGACCTAAAAAGCCCGAA	57.782	21	CCAGTCCGGTCTGATGTTTG	58.557	20	188	122	309	AACAAGACCTAAAAAGCCCGA	57.782	21	CCAGTCCGGTCTGATGTTTG	58.557	20	189	121	309
scaf_0001505_3	p3	(TTG)5	15	151	165	AGTCCCAAAAATGGAGGGGT	58.833	20	ACCACCAAGCCTATGAGGAC	59.088	20	205	77	281	AGTCCCAAAAATGGAGGGGT	58.833	20	CACCAAGCCTATGAGGACCA	59.088	20	203	77	279	AGTCCCAAAAATGGAGGGGT	58.833	20	AACCACCAAGCCTATGAGGA	58.331	20	206	77	282
scaf_0001508_2	p4	(TTAT)6	24	151	174	TTTTAGCCCATAGGACCGGT	58.413	20	GCTGGCCGAGTTGGATTG	58.809	18	100	39	138	GGTTGTTTTAGCCCATAGGACC	58.978	22	GCCGAGTTGGATTGGGTTAA	58.171	20	101	34	134	TGCTGGTAAGGTTGTTTTAGCC	59.112	22	GCCGAGTTGGATTGGGTTAA	58.171	20	110	25	134
scaf_0001508_17	p3	(TCT)15	45	151	195	TCCCATTTCTTTCTGCCTAGTT	57.342	22	GACATGATGAGCCTTGAATTTGC	58.89	23	210	115	324	TCCCATTTCTTTCTGCCTAGTT	57.342	22	CATGATGAGCCTTGAATTTGCA	57.882	22	208	115	322	TCCCATTTCTTTCTGCCTAGTT	57.342	22	ACATGATGAGCCTTGAATTTGC	57.881	22	209	115	323
scaf_0001510_16	p4	(ATAC)8	32	151	182	TTTATCAAATCGCCACCGCC	59.264	20	CGTGGCCCTTGGAATCAATT	58.815	20	177	79	255	GCCGCTGCTTCTAACTTCAT	58.626	20	CGTGGCCCTTGGAATCAATT	58.815	20	160	96	255	TTTATCAAATCGCCACCGCC	59.264	20	ATTGAACGTGGGTTGGGTCT	59.523	20	197	79	275
scaf_0001511_7	p3	(GAA)6	18	151	168	CACCTCCGATTGATCTCCAGA	58.965	21	TCCTCTAAACCCTATGAACCCT	57.636	22	120	32	151	TCACCTCCGATTGATCTCCAG	58.965	21	TCCTCTAAACCCTATGAACCCT	57.636	22	121	31	151	TCACCTCCGATTGATCTCCA	57.841	20	TCCTCTAAACCCTATGAACCCT	57.636	22	121	31	151
scaf_0001512_18	p3	(AAT)6	18	151	168	TCGAAATCCATATCCTGTCCCT	58.413	22	ACACGCAACCACATGTGATT	58.682	20	110	1	110	TCGAAATCCATATCCTGTCCCT	58.413	22	CACACGCAACCACATGTGAT	59.407	20	111	1	111	AATCACATGTGGTTGCGTGT	58.682	20	GGATCCTTTAGCTGTGATTGGT	58.109	22	116	91	206
scaf_0001515_12	p3	(TTA)5	15	151	165	GGCATCATGAGCACCACATT	58.891	20	CGTTGGTTGACTCATTACCCG	59.27	21	104	170	273	TTTGGCATCATGAGCACCAC	59.11	20	CGTTGGTTGACTCATTACCCG	59.27	21	107	167	273	GGCATCATGAGCACCACATT	58.891	20	TTTGGTCGTTGGTTGACTCA	57.595	20	110	170	279
scaf_0001518_6	p3	(TAT)5	15	151	165	AGTGGGCTCCTATTGACACC	59.088	20	ACCATGCAAGATCGCTAACT	57.301	20	130	113	242	AGTGGGCTCCTATTGACACC	59.088	20	TTCTACCATGCAAGATCGCT	57.012	20	134	113	246	AGTGGGCTCCTATTGACACC	59.088	20	ACCATGCAAGATCGCTAACTT	58.009	21	130	113	242
scaf_0001518_8	p3	(TTA)5	15	151	165	TGTTTGTGGGTGTAAGTCGT	57.305	20	AACCAAATACTCGCGTCGTG	58.935	20	176	122	297	TGTTTGTGGGTGTAAGTCGT	57.305	20	CAAATACTCGCGTCGTGGAG	59.085	20	173	122	294	TGTTTGTGGGTGTAAGTCGT	57.305	20	CGCAGCCACAAAATTGAACC	58.861	20	192	122	313
scaf_0001519_13	p3	(CTT)6	18	151	168	GGGTGTGGGCGTATATCAGA	58.955	20	GGAGAGAAGAGGGAAGGACG	58.892	20	189	63	251	GGGTGTGGGCGTATATCAGA	58.955	20	TTGGCGGAGGTGAAGAAGAA	59.238	20	117	63	179	GGGTGTGGGCGTATATCAGA	58.955	20	TTTGGCGGAGGTGAAGAAGA	59.238	20	118	63	180
scaf_0001522_1	p3	(GAA)5	15	151	165	TGAGAGCCCATACCATTGCA	59.082	20	TGTCAAAACGCAAATCCAATGG	58.612	22	138	98	235	TGAGAGCCCATACCATTGCA	59.082	20	GTCAAAACGCAAATCCAATGGT	58.611	22	137	98	234	CTCTTGTCTTTTCACTCTGGCA	58.529	22	TGCAATGGTATGGGCTCTCA	59.082	20	110	8	117
scaf_0001522_11	p3	(TTA)6	18	373	390	GGTTTGGGGGAAGAGAGAGA	58.342	20	CTGTAAGAGCCTGTTCCCCA	59.016	20	100	0	99	TGGGGAACAGGCTCTTACAG	59.016	20	ACGCCCTTCATTCTTCCAATG	58.905	21	156	80	235	TGGGGAACAGGCTCTTACAG	59.016	20	AGCATCCTAAGGTCATGTGCT	59.157	21	124	80	203
scaf_0001523_9	p3	(ATA)6	18	151	168	ACCTGGCTCCCACATAAACA	58.928	20	ATTCTGTGACGGAGGTGTGT	58.951	20	153	73	225	GGCTCCTTCACCTGTCAGAT	59.092	20	ATTCTGTGACGGAGGTGTGT	58.951	20	193	33	225	AAAGGCTCCTTCACCTGTCA	58.86	20	ATTCTGTGACGGAGGTGTGT	58.951	20	196	30	225
scaf_0001524_3	p4	(TTAT)5	20	151	170	TTCCTTGTTTTGGGGTGTGC	59.173	20	AATCCCCTCAAATCCACCCC	59.363	20	119	25	143	CCTTGTTTTGGGGTGTGCAA	59.461	20	AATCCCCTCAAATCCACCCC	59.363	20	117	27	143	GGTTCCTTGTTTTGGGGTGT	58.508	20	AATCCCCTCAAATCCACCCC	59.363	20	121	23	143
scaf_0001524_5	p4	(AATA)5	20	151	170	ACAAGAAAATGGGTCGGGTC	58.094	20	ACAAAACTCCGACGCACTTC	59.065	20	220	96	315	ACAAGAAAATGGGTCGGGTC	58.094	20	CAAAACTCCGACGCACTTCA	59.066	20	219	96	314	ACAAGAAAATGGGTCGGGTC	58.094	20	TTTCATTTGGGCCTCCCTCT	58.916	20	151	96	246
scaf_0001525_9	p3	(GGT)6	18	457	474	AATGGTGGCTTGAATGGCTC	58.811	20	AATGGGATGAGAGGGGGAGA	59.35	20	100	8	107	AAATGGTGGCTTGAATGGCT	58.352	20	ATGGGATGAGAGGGGGAGAA	59.35	20	100	7	106	AAATGGTGGCTTGAATGGCT	58.352	20	AATGGGATGAGAGGGGGAGA	59.35	20	101	7	107
scaf_0001525_10	p3	(GGT)6	18	151	168	TGGTGGTGGTGGATTTGGAT	59.217	20	AGGTGAGGCCTCGATAATGA	57.912	20	144	158	301	TAGAGACTTCGGTGGTGGTG	58.746	20	AGGTGAGGCCTCGATAATGA	57.912	20	162	140	301	TGGTGGTGGTGGATTTGGAT	59.217	20	AGGTGAGGCCTCGATAATGAT	58.386	21	144	158	301
scaf_0001525_37	p3	(GGT)6	18	287	304	TCGGGGTTTTGGCACTTTTT	58.804	20	CACCACCACCGAAGTCTCTA	58.746	20	161	135	295	CTCGGGGTTTTGGCACTTTT	59.25	20	CACCACCACCGAAGTCTCTA	58.746	20	162	134	295	AAAATGGTGGCTTGAACGGC	59.967	20	CACCACCACCGAAGTCTCTA	58.746	20	181	115	295
scaf_0001525_45	p4	(AAAG)5	20	151	170	TGTGGGGTTTGTGGAGTAGA	58.191	20	CGAGAGGATTTCCGCATGTG	59.067	20	186	52	237	TGTGGGGTTTGTGGAGTAGA	58.191	20	CACATGCGAGAGGATTTCCG	59.067	20	192	52	243	TGTGGGGTTTGTGGAGTAGA	58.191	20	TACGAGCAAGTGGACTGAGG	59.111	20	250	52	301
scaf_0001526_18	p3	(ATG)5	15	151	165	TGCATGTATAGCATTGCGGA	57.747	20	TGAGACTGAGGTGGAACTCAC	59.036	21	171	79	249	TGCATGTATAGCATTGCGGA	57.747	20	GTGCCACCAATAACACCATCA	58.833	21	102	79	180	TGCATGTATAGCATTGCGGAA	58.43	21	TGAGACTGAGGTGGAACTCAC	59.036	21	171	79	249
scaf_0001526_18	p3	(ATT)5	15	286	300	TGCATGTATAGCATTGCGGA	57.747	20	TGAGACTGAGGTGGAACTCAC	59.036	21	171	79	249	TGCATGTATAGCATTGCGGA	57.747	20	GTGCCACCAATAACACCATCA	58.833	21	102	79	180	TGCATGTATAGCATTGCGGAA	58.43	21	TGAGACTGAGGTGGAACTCAC	59.036	21	171	79	249
scaf_0001526_19	p3	(ATG)5	15	16	30	GGCACTCACTACTCCTCCAG	59.179	20	AGCAGTAGTTGTTGTGGGGA	58.863	20	141	207	347	GCACTCACTACTCCTCCAGT	58.449	20	AGCAGTAGTTGTTGTGGGGA	58.863	20	140	208	347	GGCACTCACTACTCCTCCAG	59.179	20	GCAGTAGTTGTTGTGGGGAG	58.476	20	140	207	346
scaf_0001526_21	p3	(AAC)5	15	151	165	TGAGCATGATCCTCCTTTCCA	58.801	21	GTGTGAGTTGTTGGGACCAC	58.978	20	113	104	216	TGAGCATGATCCTCCTTTCCA	58.801	21	TGTGAGTTGTTGGGACCACT	59.084	20	112	104	215	TGAGCATGATCCTCCTTTCCA	58.801	21	GGACCACTCTGCGCAAAAAT	59.402	20	100	104	203
scaf_0001527_3	p3	(ATT)14	42	151	192	CTGCCTAGTTCTCGAAACACG	59.014	21	GCTGGCCTTGAGGTCTCC	59.729	18	100	226	325	CTGCCTAGTTCTCGAAACACG	59.014	21	CGCTGGCCTTGAGGTCTC	60.125	18	101	226	326	TGCCTAGTTCTCGAAACACG	57.94	20	CGCTGGCCTTGAGGTCTC	60.125	18	100	227	326
scaf_0001527_11	p3	(TCT)5	15	151	165	AGAAGAGAGGAGGCACACAC	59.027	20	AGCACAAACCTCCTTGGGTA	58.854	20	279	35	313	GAGAGAGGAGACACACACCC	59.108	20	AGCACAAACCTCCTTGGGTA	58.854	20	208	106	313	AGAAGAGAGGAGGCACACAC	59.027	20	GCACAAACCTCCTTGGGTAC	58.755	20	278	35	312
scaf_0001527_21	p3	(GTG)5	15	151	165	TTGGGGAATTACGTCGACCA	59.025	20	AGCTGAGAAAACTTTGCGCA	58.976	20	252	1	252	TTGGGGAATTACGTCGACCA	59.025	20	TTCCTCTTCTTCGACCCACC	59.026	20	180	1	180	GTGCATATTACCCTGTGCCG	59.056	20	AGCTGAGAAAACTTTGCGCA	58.976	20	226	27	252
scaf_0001528_2	p4	(TTTA)5	20	151	170	GATTGGACCGGTTGGACGAA	60.321	20	AAACTTTAACCCAGCTGGCC	58.662	20	100	192	291	GATTGGACCGGTTGGACGA	59.706	19	AAACTTTAACCCAGCTGGCC	58.662	20	100	192	291	ATTGGACCGGTTGGACGAAT	59.673	20	TAAACTTTAACCCAGCTGGCC	58.479	21	100	193	292
scaf_0001529_17	p4	(AAAT)5	20	151	170	GTTGGTCAAAGTTCGGGGAC	59.051	20	GGGTTTTCACAGGTCGGTTG	59.334	20	108	20	127	GTTGGTCAAAGTTCGGGGAC	59.051	20	ATGGGTTTTCACAGGTCGGT	59.523	20	110	20	129	GTTGGTCAAAGTTCGGGGAC	59.051	20	GGTTTTCACAGGTCGGTTGA	58.329	20	107	20	126
[truncated: 47,511 more rows]
